# Supplementary material
Source: publisher site journal article supplement (https://www.spandidos-publications.com/3368/downloadSupplementary)
Supplement: Supplementary file 1 [file downloadSupplementary]

## Sheet: Biological Process
Term	Database	ID	Input number	Background number	All input number	All background number	Input frequency	Background frequency	P-Value	Corrected P-Value	Input	Hyperlink
keratinization	Biological Process	GO:0031424	14	49	1438	17840	0.00973574408901252	0.00274663677130045	2.102070e-05	0.1495261	hsa:353132,LCE1B,353132:down|hsa:353141,LCE2D,353141:down|hsa:353140,LCE2C,353140:down|hsa:3849,KRT2,3849:down|hsa:353143,LCE3B,353143:down|hsa:353135,LCE1E,353135:down|hsa:448835,LCE6A,448835:down|hsa:353133,LCE1C,353133:down|hsa:2125,EVPL,2125:down|hsa:353139,LCE2A,353139:down|hsa:254910,LCE5A,254910:down|hsa:353134,LCE1D,353134:down|hsa:353131,LCE1A,353131:down|hsa:26239,LCE2B,26239:down	http://amigo.geneontology.org/cgi-bin/amigo/term_details?term=GO:0031424
epidermis development	Biological Process	GO:0008544	44	295	1438	17840	0.0305980528511822	0.0165358744394619	5.178588e-05	0.1495261	hsa:23086,EXPH5,23086:down|hsa:353132,LCE1B,353132:down|hsa:6662,SOX9,6662:up|hsa:3891,KRT85,3891:up|hsa:26160,IFT172,26160:up|hsa:353139,LCE2A,353139:down|hsa:2125,EVPL,2125:down|hsa:353131,LCE1A,353131:down|hsa:7474,WNT5A,7474:up|hsa:9355,LHX2,9355:up|hsa:4610,MYCL,4610:down|hsa:100129271,C1orf68,100129271:down|hsa:10628,TXNIP,10628:down|hsa:353143,LCE3B,353143:down|hsa:9475,ROCK2,9475:up|hsa:2…	http://amigo.geneontology.org/cgi-bin/amigo/term_details?term=GO:0008544
peptide cross-linking	Biological Process	GO:0018149	14	55	1438	17840	0.00973574408901252	0.00308295964125561	8.571948e-05	0.1495261	hsa:353132,LCE1B,353132:down|hsa:353141,LCE2D,353141:down|hsa:353140,LCE2C,353140:down|hsa:100129271,C1orf68,100129271:down|hsa:353135,LCE1E,353135:down|hsa:353143,LCE3B,353143:down|hsa:353133,LCE1C,353133:down|hsa:353139,LCE2A,353139:down|hsa:2125,EVPL,2125:down|hsa:254910,LCE5A,254910:down|hsa:353134,LCE1D,353134:down|hsa:353131,LCE1A,353131:down|hsa:26239,LCE2B,26239:down|hsa:9333,TGM5,9333:do…	http://amigo.geneontology.org/cgi-bin/amigo/term_details?term=GO:0018149
skin development	Biological Process	GO:0043588	37	239	1438	17840	0.0257301808066759	0.0133968609865471	9.108189e-05	0.1495261	hsa:23086,EXPH5,23086:down|hsa:10058,ABCB6,10058:up|hsa:353132,LCE1B,353132:down|hsa:3728,JUP,3728:down|hsa:6662,SOX9,6662:up|hsa:353139,LCE2A,353139:down|hsa:2125,EVPL,2125:down|hsa:121549,ASCL4,121549:up|hsa:353131,LCE1A,353131:down|hsa:7474,WNT5A,7474:up|hsa:9355,LHX2,9355:up|hsa:100129271,C1orf68,100129271:down|hsa:10628,TXNIP,10628:down|hsa:353143,LCE3B,353143:down|hsa:9475,ROCK2,9475:up|hsa…	http://amigo.geneontology.org/cgi-bin/amigo/term_details?term=GO:0043588
keratinocyte differentiation	Biological Process	GO:0030216	23	124	1438	17840	0.0159944367176634	0.00695067264573991	1.310426e-04	0.1678643	hsa:23086,EXPH5,23086:down|hsa:353132,LCE1B,353132:down|hsa:448835,LCE6A,448835:down|hsa:353139,LCE2A,353139:down|hsa:2125,EVPL,2125:down|hsa:353131,LCE1A,353131:down|hsa:7474,WNT5A,7474:up|hsa:7421,VDR,7421:up|hsa:353141,LCE2D,353141:down|hsa:353140,LCE2C,353140:down|hsa:100129271,C1orf68,100129271:down|hsa:204219,CERS3,204219:down|hsa:10628,TXNIP,10628:down|hsa:2069,EREG,2069:down|hsa:353143,LC…	http://amigo.geneontology.org/cgi-bin/amigo/term_details?term=GO:0030216
epidermal cell differentiation	Biological Process	GO:0009913	29	176	1438	17840	0.0201668984700974	0.00986547085201794	1.704206e-04	0.1678643	hsa:23086,EXPH5,23086:down|hsa:353132,LCE1B,353132:down|hsa:448835,LCE6A,448835:down|hsa:353139,LCE2A,353139:down|hsa:2125,EVPL,2125:down|hsa:353131,LCE1A,353131:down|hsa:7474,WNT5A,7474:up|hsa:7421,VDR,7421:up|hsa:353141,LCE2D,353141:down|hsa:353140,LCE2C,353140:down|hsa:9314,KLF4,9314:down|hsa:4610,MYCL,4610:down|hsa:100129271,C1orf68,100129271:down|hsa:204219,CERS3,204219:down|hsa:10628,TXNIP,…	http://amigo.geneontology.org/cgi-bin/amigo/term_details?term=GO:0009913
tube formation	Biological Process	GO:0035148	23	131	1438	17840	0.0159944367176634	0.00734304932735426	3.041537e-04	0.2496595	hsa:26585,GREM1,26585:down|hsa:57167,SALL4,57167:down|hsa:57545,CC2D2A,57545:up|hsa:7976,FZD3,7976:up|hsa:6662,SOX9,6662:up|hsa:26160,IFT172,26160:up|hsa:9585,KIF20B,9585:up|hsa:25902,MTHFD1L,25902:up|hsa:2535,FZD2,2535:up|hsa:57216,VANGL2,57216:up|hsa:6491,STIL,6491:up|hsa:7474,WNT5A,7474:up|hsa:10913,EDAR,10913:up|hsa:6788,STK3,6788:up|hsa:9355,LHX2,9355:up|hsa:3091,HIF1A,3091:up|hsa:8543,LMO4,…	http://amigo.geneontology.org/cgi-bin/amigo/term_details?term=GO:0035148
centromere complex assembly	Biological Process	GO:0034508	12	50	1438	17840	0.00834492350486787	0.00280269058295964	4.877673e-04	0.3695775	hsa:3070,HELLS,3070:up|hsa:1063,CENPF,1063:up|hsa:54069,MIS18A,54069:up|hsa:4869,NPM1,4869:up|hsa:64105,CENPK,64105:up|hsa:51773,RSF1,51773:up|hsa:1062,CENPE,1062:up|hsa:26054,SENP6,26054:up|hsa:8467,SMARCA5,8467:up|hsa:5928,RBBP4,5928:up|hsa:378708,APITD1,378708:up|hsa:55320,MIS18BP1,55320:up	http://amigo.geneontology.org/cgi-bin/amigo/term_details?term=GO:0034508
regulation of receptor biosynthetic process	Biological Process	GO:0010869	7	20	1438	17840	0.00486787204450626	0.00112107623318386	6.609849e-04	0.4291801	hsa:10802,SEC24A,10802:up|hsa:81573,ANKRD13C,81573:up|hsa:10330,CNPY2,10330:up|hsa:3091,HIF1A,3091:up|hsa:9572,NR1D1,9572:down|hsa:3066,HDAC2,3066:up|hsa:3202,HOXA5,3202:down	http://amigo.geneontology.org/cgi-bin/amigo/term_details?term=GO:0010869
cell division	Biological Process	GO:0051301	73	623	1438	17840	0.0507649513212796	0.0349215246636771	7.553011e-04	0.4291801	hsa:9134,CCNE2,9134:up|hsa:685,BTC,685:down|hsa:546,ATRX,546:up|hsa:1950,EGF,1950:up|hsa:85444,LRRCC1,85444:up|hsa:10403,NDC80,10403:up|hsa:891,CCNB1,891:up|hsa:3925,STMN1,3925:up|hsa:5218,CDK14,5218:up|hsa:7474,WNT5A,7474:up|hsa:23607,CD2AP,23607:up|hsa:11064,CNTRL,11064:up|hsa:10628,TXNIP,10628:down|hsa:3479,IGF1,3479:down|hsa:55752,SEPT11,55752:up|hsa:5008,OSM,5008:up|hsa:6787,NEK4,6787:up|hsa…	http://amigo.geneontology.org/cgi-bin/amigo/term_details?term=GO:0051301
nuclear division	Biological Process	GO:0000280	65	541	1438	17840	0.045201668984701	0.0303251121076233	7.557329e-04	0.4291801	hsa:685,BTC,685:down|hsa:546,ATRX,546:up|hsa:1950,EGF,1950:up|hsa:85444,LRRCC1,85444:up|hsa:10403,NDC80,10403:up|hsa:891,CCNB1,891:up|hsa:84690,SPATA22,84690:down|hsa:7474,WNT5A,7474:up|hsa:23607,CD2AP,23607:up|hsa:676,BRDT,676:down|hsa:3479,IGF1,3479:down|hsa:3306,HSPA2,3306:down|hsa:5008,OSM,5008:up|hsa:6787,NEK4,6787:up|hsa:90417,KNSTRN,90417:up|hsa:55726,ASUN,55726:up|hsa:56992,KIF15,56992:up…	http://amigo.geneontology.org/cgi-bin/amigo/term_details?term=GO:0000280
morphogenesis of embryonic epithelium	Biological Process	GO:0016331	23	140	1438	17840	0.0159944367176634	0.007847533632287	8.015794e-04	0.4291801	hsa:57669,EPB41L5,57669:up|hsa:26585,GREM1,26585:down|hsa:57167,SALL4,57167:down|hsa:57545,CC2D2A,57545:up|hsa:7976,FZD3,7976:up|hsa:6662,SOX9,6662:up|hsa:26160,IFT172,26160:up|hsa:9585,KIF20B,9585:up|hsa:25902,MTHFD1L,25902:up|hsa:2535,FZD2,2535:up|hsa:6491,STIL,6491:up|hsa:57216,VANGL2,57216:up|hsa:7474,WNT5A,7474:up|hsa:7482,WNT2B,7482:down|hsa:6788,STK3,6788:up|hsa:3091,HIF1A,3091:up|hsa:9355…	http://amigo.geneontology.org/cgi-bin/amigo/term_details?term=GO:0016331
embryonic epithelial tube formation	Biological Process	GO:0001838	20	115	1438	17840	0.0139082058414465	0.00644618834080718	8.278601e-04	0.4291801	hsa:26585,GREM1,26585:down|hsa:57167,SALL4,57167:down|hsa:57545,CC2D2A,57545:up|hsa:7976,FZD3,7976:up|hsa:6662,SOX9,6662:up|hsa:26160,IFT172,26160:up|hsa:9585,KIF20B,9585:up|hsa:25902,MTHFD1L,25902:up|hsa:2535,FZD2,2535:up|hsa:57216,VANGL2,57216:up|hsa:6491,STIL,6491:up|hsa:7474,WNT5A,7474:up|hsa:6788,STK3,6788:up|hsa:9355,LHX2,9355:up|hsa:3091,HIF1A,3091:up|hsa:8543,LMO4,8543:up|hsa:4040,LRP6,40…	http://amigo.geneontology.org/cgi-bin/amigo/term_details?term=GO:0001838
epithelial tube formation	Biological Process	GO:0072175	20	116	1438	17840	0.0139082058414465	0.00650224215246637	9.260913e-04	0.4560999	hsa:26585,GREM1,26585:down|hsa:57167,SALL4,57167:down|hsa:57545,CC2D2A,57545:up|hsa:7976,FZD3,7976:up|hsa:6662,SOX9,6662:up|hsa:26160,IFT172,26160:up|hsa:9585,KIF20B,9585:up|hsa:25902,MTHFD1L,25902:up|hsa:2535,FZD2,2535:up|hsa:57216,VANGL2,57216:up|hsa:6491,STIL,6491:up|hsa:7474,WNT5A,7474:up|hsa:6788,STK3,6788:up|hsa:9355,LHX2,9355:up|hsa:3091,HIF1A,3091:up|hsa:8543,LMO4,8543:up|hsa:4040,LRP6,40…	http://amigo.geneontology.org/cgi-bin/amigo/term_details?term=GO:0072175
negative regulation of mesenchymal cell proliferation	Biological Process	GO:0072201	4	7	1438	17840	0.00278164116828929	0.00039237668161435	1.206405e-03	0.4970028	hsa:56998,CTNNBIP1,56998:down|hsa:652,BMP4,652:down|hsa:9678,PHF14,9678:up|hsa:7474,WNT5A,7474:up	http://amigo.geneontology.org/cgi-bin/amigo/term_details?term=GO:0072201
positive regulation of protein localization to nucleus	Biological Process	GO:1900182	21	127	1438	17840	0.0146036161335188	0.00711883408071749	1.217865e-03	0.4970028	hsa:10576,CCT2,10576:up|hsa:26585,GREM1,26585:down|hsa:3728,JUP,3728:down|hsa:1950,EGF,1950:up|hsa:3843,IPO5,3843:up|hsa:9451,EIF2AK3,9451:up|hsa:5532,PPP3CB,5532:up|hsa:672,BRCA1,672:up|hsa:22948,CCT5,22948:up|hsa:7097,TLR2,7097:up|hsa:7175,TPR,7175:up|hsa:6950,TCP1,6950:up|hsa:10913,EDAR,10913:up|hsa:23607,CD2AP,23607:up|hsa:3479,IGF1,3479:down|hsa:6548,SLC9A1,6548:down|hsa:3717,JAK2,3717:up|hs…	http://amigo.geneontology.org/cgi-bin/amigo/term_details?term=GO:1900182
primary neural tube formation	Biological Process	GO:0014020	16	86	1438	17840	0.0111265646731572	0.00482062780269058	1.275394e-03	0.4970028	hsa:57167,SALL4,57167:down|hsa:57545,CC2D2A,57545:up|hsa:7976,FZD3,7976:up|hsa:26160,IFT172,26160:up|hsa:9585,KIF20B,9585:up|hsa:25902,MTHFD1L,25902:up|hsa:2535,FZD2,2535:up|hsa:57216,VANGL2,57216:up|hsa:6491,STIL,6491:up|hsa:7474,WNT5A,7474:up|hsa:9355,LHX2,9355:up|hsa:3091,HIF1A,3091:up|hsa:8543,LMO4,8543:up|hsa:4040,LRP6,4040:up|hsa:652,BMP4,652:down|hsa:23242,COBL,23242:down	http://amigo.geneontology.org/cgi-bin/amigo/term_details?term=GO:0014020
neural tube formation	Biological Process	GO:0001841	17	95	1438	17840	0.0118219749652295	0.00532511210762332	1.429357e-03	0.4970028	hsa:57167,SALL4,57167:down|hsa:57545,CC2D2A,57545:up|hsa:7976,FZD3,7976:up|hsa:26160,IFT172,26160:up|hsa:9585,KIF20B,9585:up|hsa:25902,MTHFD1L,25902:up|hsa:2535,FZD2,2535:up|hsa:57216,VANGL2,57216:up|hsa:6491,STIL,6491:up|hsa:7474,WNT5A,7474:up|hsa:6788,STK3,6788:up|hsa:9355,LHX2,9355:up|hsa:3091,HIF1A,3091:up|hsa:8543,LMO4,8543:up|hsa:4040,LRP6,4040:up|hsa:652,BMP4,652:down|hsa:23242,COBL,23242:…	http://amigo.geneontology.org/cgi-bin/amigo/term_details?term=GO:0001841
mitotic cell cycle	Biological Process	GO:0000278	101	936	1438	17840	0.0702364394993046	0.0524663677130045	1.463257e-03	0.4970028	hsa:9134,CCNE2,9134:up|hsa:10142,AKAP9,10142:up|hsa:685,BTC,685:down|hsa:11116,FGFR1OP,11116:up|hsa:90,ACVR1,90:up|hsa:80321,CEP70,80321:up|hsa:10383,TUBB4B,10383:down|hsa:546,ATRX,546:up|hsa:5721,PSME2,5721:up|hsa:1950,EGF,1950:up|hsa:85444,LRRCC1,85444:up|hsa:10403,NDC80,10403:up|hsa:4869,NPM1,4869:up|hsa:891,CCNB1,891:up|hsa:3925,STMN1,3925:up|hsa:637,BID,637:up|hsa:6491,STIL,6491:up|hsa:5218,…	http://amigo.geneontology.org/cgi-bin/amigo/term_details?term=GO:0000278
mitotic cell cycle process	Biological Process	GO:1903047	94	867	1438	17840	0.0653685674547983	0.0485986547085202	1.827489e-03	0.5272540	hsa:9134,CCNE2,9134:up|hsa:10142,AKAP9,10142:up|hsa:685,BTC,685:down|hsa:11116,FGFR1OP,11116:up|hsa:90,ACVR1,90:up|hsa:80321,CEP70,80321:up|hsa:10383,TUBB4B,10383:down|hsa:546,ATRX,546:up|hsa:5721,PSME2,5721:up|hsa:1950,EGF,1950:up|hsa:85444,LRRCC1,85444:up|hsa:10403,NDC80,10403:up|hsa:4869,NPM1,4869:up|hsa:891,CCNB1,891:up|hsa:3925,STMN1,3925:up|hsa:637,BID,637:up|hsa:6491,STIL,6491:up|hsa:5218,…	http://amigo.geneontology.org/cgi-bin/amigo/term_details?term=GO:1903047
neural tube closure	Biological Process	GO:0001843	15	82	1438	17840	0.0104311543810848	0.00459641255605381	2.124926e-03	0.5475009	hsa:57167,SALL4,57167:down|hsa:9355,LHX2,9355:up|hsa:57545,CC2D2A,57545:up|hsa:8543,LMO4,8543:up|hsa:7976,FZD3,7976:up|hsa:4040,LRP6,4040:up|hsa:26160,IFT172,26160:up|hsa:9585,KIF20B,9585:up|hsa:652,BMP4,652:down|hsa:25902,MTHFD1L,25902:up|hsa:2535,FZD2,2535:up|hsa:57216,VANGL2,57216:up|hsa:6491,STIL,6491:up|hsa:23242,COBL,23242:down|hsa:7474,WNT5A,7474:up	http://amigo.geneontology.org/cgi-bin/amigo/term_details?term=GO:0001843
protein complex subunit organization	Biological Process	GO:0071822	179	1816	1438	17840	0.124478442280946	0.101793721973094	2.170714e-03	0.5475009	hsa:6712,SPTBN2,6712:down|hsa:8936,WASF1,8936:up|hsa:10157,AASS,10157:up|hsa:1410,CRYAB,1410:down|hsa:546,ATRX,546:up|hsa:7381,UQCRB,7381:up|hsa:57505,AARS2,57505:up|hsa:1950,EGF,1950:up|hsa:25802,LMOD1,25802:down|hsa:10403,NDC80,10403:up|hsa:140803,TRPM6,140803:up|hsa:50810,HDGFRP3,50810:up|hsa:1798,DPAGT1,1798:up|hsa:26160,IFT172,26160:up|hsa:4869,NPM1,4869:up|hsa:2266,FGG,2266:down|hsa:90167,F…	http://amigo.geneontology.org/cgi-bin/amigo/term_details?term=GO:0071822
receptor biosynthetic process	Biological Process	GO:0032800	7	24	1438	17840	0.00486787204450626	0.00134529147982063	2.217761e-03	0.5475009	hsa:10802,SEC24A,10802:up|hsa:81573,ANKRD13C,81573:up|hsa:10330,CNPY2,10330:up|hsa:3091,HIF1A,3091:up|hsa:9572,NR1D1,9572:down|hsa:3066,HDAC2,3066:up|hsa:3202,HOXA5,3202:down	http://amigo.geneontology.org/cgi-bin/amigo/term_details?term=GO:0032800
regulation of Golgi to plasma membrane protein transport	Biological Process	GO:0042996	4	8	1438	17840	0.00278164116828929	0.000448430493273543	2.258952e-03	0.5475009	hsa:163882,CNST,163882:down|hsa:91461,PKDCC,91461:down|hsa:57120,GOPC,57120:up|hsa:2181,ACSL3,2181:up	http://amigo.geneontology.org/cgi-bin/amigo/term_details?term=GO:0042996
cell cycle process	Biological Process	GO:0022402	132	1290	1438	17840	0.0917941585535466	0.0723094170403587	2.278938e-03	0.5475009	hsa:11116,FGFR1OP,11116:up|hsa:90,ACVR1,90:up|hsa:546,ATRX,546:up|hsa:1950,EGF,1950:up|hsa:10403,NDC80,10403:up|hsa:4869,NPM1,4869:up|hsa:891,CCNB1,891:up|hsa:23225,NUP210,23225:up|hsa:23607,CD2AP,23607:up|hsa:11064,CNTRL,11064:up|hsa:84131,CEP78,84131:up|hsa:3479,IGF1,3479:down|hsa:1977,EIF4E,1977:up|hsa:7277,TUBA4A,7277:down|hsa:5008,OSM,5008:up|hsa:6787,NEK4,6787:up|hsa:51065,RPS27L,51065:up|h…	http://amigo.geneontology.org/cgi-bin/amigo/term_details?term=GO:0022402
tube closure	Biological Process	GO:0060606	15	83	1438	17840	0.0104311543810848	0.004652466367713	2.404506e-03	0.5612720	hsa:57167,SALL4,57167:down|hsa:9355,LHX2,9355:up|hsa:57545,CC2D2A,57545:up|hsa:8543,LMO4,8543:up|hsa:7976,FZD3,7976:up|hsa:4040,LRP6,4040:up|hsa:26160,IFT172,26160:up|hsa:9585,KIF20B,9585:up|hsa:652,BMP4,652:down|hsa:25902,MTHFD1L,25902:up|hsa:2535,FZD2,2535:up|hsa:57216,VANGL2,57216:up|hsa:6491,STIL,6491:up|hsa:23242,COBL,23242:down|hsa:7474,WNT5A,7474:up	http://amigo.geneontology.org/cgi-bin/amigo/term_details?term=GO:0060606
cell cycle	Biological Process	GO:0007049	164	1652	1438	17840	0.114047287899861	0.0926008968609865	2.497776e-03	0.5612720	hsa:892,CCNC,892:up|hsa:11116,FGFR1OP,11116:up|hsa:90,ACVR1,90:up|hsa:546,ATRX,546:up|hsa:1950,EGF,1950:up|hsa:10403,NDC80,10403:up|hsa:4869,NPM1,4869:up|hsa:891,CCNB1,891:up|hsa:23225,NUP210,23225:up|hsa:23607,CD2AP,23607:up|hsa:11064,CNTRL,11064:up|hsa:84131,CEP78,84131:up|hsa:3479,IGF1,3479:down|hsa:1977,EIF4E,1977:up|hsa:55749,CCAR1,55749:up|hsa:7277,TUBA4A,7277:down|hsa:5008,OSM,5008:up|hsa:…	http://amigo.geneontology.org/cgi-bin/amigo/term_details?term=GO:0007049
organelle fission	Biological Process	GO:0048285	66	578	1438	17840	0.0458970792767733	0.0323991031390135	2.507205e-03	0.5612720	hsa:685,BTC,685:down|hsa:546,ATRX,546:up|hsa:1950,EGF,1950:up|hsa:85444,LRRCC1,85444:up|hsa:10403,NDC80,10403:up|hsa:891,CCNB1,891:up|hsa:84690,SPATA22,84690:down|hsa:7474,WNT5A,7474:up|hsa:23607,CD2AP,23607:up|hsa:676,BRDT,676:down|hsa:3479,IGF1,3479:down|hsa:3306,HSPA2,3306:down|hsa:5008,OSM,5008:up|hsa:6787,NEK4,6787:up|hsa:90417,KNSTRN,90417:up|hsa:55726,ASUN,55726:up|hsa:56992,KIF15,56992:up…	http://amigo.geneontology.org/cgi-bin/amigo/term_details?term=GO:0048285
protein sumoylation	Biological Process	GO:0016925	20	127	1438	17840	0.0139082058414465	0.00711883408071749	2.851861e-03	0.6242408	hsa:10735,STAG2,10735:up|hsa:6612,SUMO3,6612:up|hsa:79677,SMC6,79677:up|hsa:7155,TOP2B,7155:up|hsa:57691,-,57691:up|hsa:672,BRCA1,672:up|hsa:641,BLM,641:up|hsa:1959,EGR2,1959:up|hsa:7153,TOP2A,7153:up|hsa:7175,TPR,7175:up|hsa:23225,NUP210,23225:up|hsa:7158,TP53BP1,7158:up|hsa:84733,CBX2,84733:up|hsa:26054,SENP6,26054:up|hsa:648,BMI1,648:up|hsa:64135,IFIH1,64135:up|hsa:7518,XRCC4,7518:up|hsa:9818,…	http://amigo.geneontology.org/cgi-bin/amigo/term_details?term=GO:0016925
positive regulation of DNA replication	Biological Process	GO:0045740	15	86	1438	17840	0.0104311543810848	0.00482062780269058	3.431380e-03	0.6337289	hsa:22948,CCT5,22948:up|hsa:811,CALR,811:up|hsa:10576,CCT2,10576:up|hsa:466,ATF1,466:up|hsa:26585,GREM1,26585:down|hsa:6950,TCP1,6950:up|hsa:546,ATRX,546:up|hsa:9314,KLF4,9314:down|hsa:4142,MAS1,4142:down|hsa:2069,EREG,2069:down|hsa:4751,NEK2,4751:down|hsa:3479,IGF1,3479:down|hsa:545,ATR,545:up|hsa:652,BMP4,652:down|hsa:2735,GLI1,2735:up	http://amigo.geneontology.org/cgi-bin/amigo/term_details?term=GO:0045740
regulation of protein complex disassembly	Biological Process	GO:0043244	15	86	1438	17840	0.0104311543810848	0.00482062780269058	3.431380e-03	0.6337289	hsa:5756,TWF1,5756:up|hsa:29765,TMOD4,29765:up|hsa:6712,SPTBN2,6712:down|hsa:10247,RIDA,10247:up|hsa:57026,PDXP,57026:up|hsa:57159,TRIM54,57159:up|hsa:10677,AVIL,10677:up|hsa:9617,MTRF1,9617:up|hsa:56648,EIF5A2,56648:up|hsa:25802,LMOD1,25802:down|hsa:50810,HDGFRP3,50810:up|hsa:830,CAPZA2,830:up|hsa:4281,MID1,4281:down|hsa:23064,SETX,23064:up|hsa:85477,SCIN,85477:down	http://amigo.geneontology.org/cgi-bin/amigo/term_details?term=GO:0043244
cell cycle G2/M phase transition	Biological Process	GO:0044839	27	193	1438	17840	0.0187760778859527	0.0108183856502242	3.449873e-03	0.6337289	hsa:3161,HMMR,3161:up|hsa:22995,CEP152,22995:up|hsa:10142,AKAP9,10142:up|hsa:11116,FGFR1OP,11116:up|hsa:152110,NEK10,152110:up|hsa:80321,CEP70,80321:up|hsa:4659,PPP1R12A,4659:up|hsa:10383,TUBB4B,10383:down|hsa:1112,FOXN3,1112:down|hsa:1063,CENPF,1063:up|hsa:4869,NPM1,4869:up|hsa:891,CCNB1,891:up|hsa:641,BLM,641:up|hsa:5218,CDK14,5218:up|hsa:9738,CCP110,9738:up|hsa:80184,CEP290,80184:up|hsa:11064,…	http://amigo.geneontology.org/cgi-bin/amigo/term_details?term=GO:0044839
kinetochore organization	Biological Process	GO:0051383	5	14	1438	17840	0.00347705146036161	0.0007847533632287	3.647090e-03	0.6337289	hsa:1062,CENPE,1062:up|hsa:10592,SMC2,10592:up|hsa:26054,SENP6,26054:up|hsa:1063,CENPF,1063:up|hsa:10051,SMC4,10051:up	http://amigo.geneontology.org/cgi-bin/amigo/term_details?term=GO:0051383
DNA replication	Biological Process	GO:0006260	42	340	1438	17840	0.0292072322670376	0.0190582959641256	3.681249e-03	0.6337289	hsa:9134,CCNE2,9134:up|hsa:114799,ESCO1,114799:up|hsa:4175,MCM6,4175:up|hsa:546,ATRX,546:up|hsa:4142,MAS1,4142:down|hsa:54962,TIPIN,54962:up|hsa:1602,DACH1,1602:up|hsa:1950,EGF,1950:up|hsa:22944,KIN,22944:up|hsa:157570,ESCO2,157570:up|hsa:7155,TOP2B,7155:up|hsa:641,BLM,641:up|hsa:254394,MCM9,254394:down|hsa:22948,CCT5,22948:up|hsa:811,CALR,811:up|hsa:7153,TOP2A,7153:up|hsa:466,ATF1,466:up|hsa:475…	http://amigo.geneontology.org/cgi-bin/amigo/term_details?term=GO:0006260
positive regulation of calcineurin-NFAT signaling cascade	Biological Process	GO:0070886	4	9	1438	17840	0.00278164116828929	0.000504484304932735	3.807598e-03	0.6337289	hsa:6548,SLC9A1,6548:down|hsa:2065,ERBB3,2065:down|hsa:63928,CHP2,63928:down|hsa:3479,IGF1,3479:down	http://amigo.geneontology.org/cgi-bin/amigo/term_details?term=GO:0070886
cardiac muscle cell differentiation	Biological Process	GO:0055007	15	87	1438	17840	0.0104311543810848	0.00487668161434978	3.844543e-03	0.6337289	hsa:811,CALR,811:up|hsa:9150,CTDP1,9150:down|hsa:26585,GREM1,26585:down|hsa:90,ACVR1,90:up|hsa:23363,OBSL1,23363:up|hsa:70,ACTC1,70:down|hsa:10529,NEBL,10529:down|hsa:4878,NPPA,4878:up|hsa:6548,SLC9A1,6548:down|hsa:652,BMP4,652:down|hsa:891,CCNB1,891:up|hsa:9474,ATG5,9474:up|hsa:91624,NEXN,91624:up|hsa:55553,SOX6,55553:down|hsa:4629,MYH11,4629:down	http://amigo.geneontology.org/cgi-bin/amigo/term_details?term=GO:0055007
regulation of protein tyrosine kinase activity	Biological Process	GO:0061097	12	63	1438	17840	0.00834492350486787	0.00353139013452915	4.055059e-03	0.6337289	hsa:5771,PTPN2,5771:up|hsa:10808,HSPH1,10808:up|hsa:11116,FGFR1OP,11116:up|hsa:26585,GREM1,26585:down|hsa:100133941,CD24,100133941:up|hsa:25998,IBTK,25998:up|hsa:1950,EGF,1950:up|hsa:2069,EREG,2069:down|hsa:122809,SOCS4,122809:up|hsa:55294,FBXW7,55294:down|hsa:2065,ERBB3,2065:down|hsa:9148,NEURL1,9148:down	http://amigo.geneontology.org/cgi-bin/amigo/term_details?term=GO:0061097
peptidyl-tryptophan modification	Biological Process	GO:0018211	3	5	1438	17840	0.00208623087621697	0.000280269058295964	4.616576e-03	0.6337289	hsa:23333,DPY19L1,23333:up|hsa:286148,DPY19L4,286148:up|hsa:147991,DPY19L3,147991:up	http://amigo.geneontology.org/cgi-bin/amigo/term_details?term=GO:0018211
protein C-linked glycosylation	Biological Process	GO:0018103	3	5	1438	17840	0.00208623087621697	0.000280269058295964	4.616576e-03	0.6337289	hsa:23333,DPY19L1,23333:up|hsa:286148,DPY19L4,286148:up|hsa:147991,DPY19L3,147991:up	http://amigo.geneontology.org/cgi-bin/amigo/term_details?term=GO:0018103
protein C-linked glycosylation via 2'-alpha-mannosyl-L-tryptophan	Biological Process	GO:0018406	3	5	1438	17840	0.00208623087621697	0.000280269058295964	4.616576e-03	0.6337289	hsa:23333,DPY19L1,23333:up|hsa:286148,DPY19L4,286148:up|hsa:147991,DPY19L3,147991:up	http://amigo.geneontology.org/cgi-bin/amigo/term_details?term=GO:0018406
protein C-linked glycosylation via tryptophan	Biological Process	GO:0018317	3	5	1438	17840	0.00208623087621697	0.000280269058295964	4.616576e-03	0.6337289	hsa:23333,DPY19L1,23333:up|hsa:286148,DPY19L4,286148:up|hsa:147991,DPY19L3,147991:up	http://amigo.geneontology.org/cgi-bin/amigo/term_details?term=GO:0018317
regulation of histone H4-K16 acetylation	Biological Process	GO:2000618	3	5	1438	17840	0.00208623087621697	0.000280269058295964	4.616576e-03	0.6337289	hsa:672,BRCA1,672:up|hsa:9474,ATG5,9474:up|hsa:26053,AUTS2,26053:up	http://amigo.geneontology.org/cgi-bin/amigo/term_details?term=GO:2000618
interleukin-2-mediated signaling pathway	Biological Process	GO:0038110	3	5	1438	17840	0.00208623087621697	0.000280269058295964	4.616576e-03	0.6337289	hsa:5771,PTPN2,5771:up|hsa:3559,IL2RA,3559:up|hsa:3561,IL2RG,3561:up	http://amigo.geneontology.org/cgi-bin/amigo/term_details?term=GO:0038110
positive regulation of ATPase activity	Biological Process	GO:0032781	9	41	1438	17840	0.0062586926286509	0.00229820627802691	4.627726e-03	0.6337289	hsa:54431,DNAJC10,54431:up|hsa:5359,PLSCR1,5359:up|hsa:64215,DNAJC1,64215:up|hsa:130872,AHSA2,130872:up|hsa:154,ADRB2,154:down|hsa:7168,TPM1,7168:up|hsa:229,ALDOB,229:down|hsa:29128,UHRF1,29128:up|hsa:3306,HSPA2,3306:down	http://amigo.geneontology.org/cgi-bin/amigo/term_details?term=GO:0032781
regulation of DNA replication	Biological Process	GO:0006275	23	161	1438	17840	0.0159944367176634	0.00902466367713005	5.113544e-03	0.6337289	hsa:10576,CCT2,10576:up|hsa:26585,GREM1,26585:down|hsa:114799,ESCO1,114799:up|hsa:546,ATRX,546:up|hsa:4142,MAS1,4142:down|hsa:54962,TIPIN,54962:up|hsa:1602,DACH1,1602:up|hsa:10735,STAG2,10735:up|hsa:157570,ESCO2,157570:up|hsa:641,BLM,641:up|hsa:811,CALR,811:up|hsa:22948,CCT5,22948:up|hsa:466,ATF1,466:up|hsa:675,BRCA2,675:up|hsa:6950,TCP1,6950:up|hsa:9314,KLF4,9314:down|hsa:3479,IGF1,3479:down|hsa…	http://amigo.geneontology.org/cgi-bin/amigo/term_details?term=GO:0006275
negative regulation of cytoskeleton organization	Biological Process	GO:0051494	18	116	1438	17840	0.0125173852573018	0.00650224215246637	5.281100e-03	0.6337289	hsa:6712,SPTBN2,6712:down|hsa:25802,LMOD1,25802:down|hsa:50810,HDGFRP3,50810:up|hsa:4869,NPM1,4869:up|hsa:672,BRCA1,672:up|hsa:90167,FRMD7,90167:down|hsa:830,CAPZA2,830:up|hsa:899,CCNF,899:up|hsa:27124,INPP5J,27124:down|hsa:3925,STMN1,3925:up|hsa:85477,SCIN,85477:down|hsa:5756,TWF1,5756:up|hsa:29765,TMOD4,29765:up|hsa:10677,AVIL,10677:up|hsa:57159,TRIM54,57159:up|hsa:4751,NEK2,4751:down|hsa:83715…	http://amigo.geneontology.org/cgi-bin/amigo/term_details?term=GO:0051494
negative regulation of organelle organization	Biological Process	GO:0010639	37	298	1438	17840	0.0257301808066759	0.0167040358744395	5.655953e-03	0.6337289	hsa:6712,SPTBN2,6712:down|hsa:9637,FEZ2,9637:up|hsa:546,ATRX,546:up|hsa:79142,PHF23,79142:up|hsa:1063,CENPF,1063:up|hsa:25802,LMOD1,25802:down|hsa:50810,HDGFRP3,50810:up|hsa:4869,NPM1,4869:up|hsa:90167,FRMD7,90167:down|hsa:891,CCNB1,891:up|hsa:3925,STMN1,3925:up|hsa:85477,SCIN,85477:down|hsa:5756,TWF1,5756:up|hsa:9738,CCP110,9738:up|hsa:57103,TIGAR,57103:up|hsa:10449,ACAA2,10449:up|hsa:4751,NEK2,…	http://amigo.geneontology.org/cgi-bin/amigo/term_details?term=GO:0010639
positive regulation of release of cytochrome c from mitochondria	Biological Process	GO:0090200	7	28	1438	17840	0.00486787204450626	0.0015695067264574	5.711521e-03	0.6337289	hsa:8743,TNFSF10,8743:up|hsa:10018,BCL2L11,10018:up|hsa:5366,PMAIP1,5366:up|hsa:9141,PDCD5,9141:up|hsa:637,BID,637:up|hsa:10962,MLLT11,10962:up|hsa:638,BIK,638:up	http://amigo.geneontology.org/cgi-bin/amigo/term_details?term=GO:0090200
regulation of RNA export from nucleus	Biological Process	GO:0046831	4	10	1438	17840	0.00278164116828929	0.000560538116591928	5.943749e-03	0.6337289	hsa:22916,NCBP2,22916:up|hsa:7175,TPR,7175:up|hsa:11163,NUDT4,11163:up|hsa:55677,IWS1,55677:up	http://amigo.geneontology.org/cgi-bin/amigo/term_details?term=GO:0046831
positive regulation of protein import into nucleus	Biological Process	GO:0042307	16	100	1438	17840	0.0111265646731572	0.00560538116591928	6.135663e-03	0.6337289	hsa:26585,GREM1,26585:down|hsa:3728,JUP,3728:down|hsa:1950,EGF,1950:up|hsa:3843,IPO5,3843:up|hsa:5532,PPP3CB,5532:up|hsa:672,BRCA1,672:up|hsa:7175,TPR,7175:up|hsa:7097,TLR2,7097:up|hsa:10913,EDAR,10913:up|hsa:3479,IGF1,3479:down|hsa:6548,SLC9A1,6548:down|hsa:3717,JAK2,3717:up|hsa:3320,HSP90AA1,3320:up|hsa:652,BMP4,652:down|hsa:56892,C8orf4,56892:up|hsa:63928,CHP2,63928:down	http://amigo.geneontology.org/cgi-bin/amigo/term_details?term=GO:0042307
mitotic nuclear division	Biological Process	GO:0007067	49	422	1438	17840	0.0340751043115438	0.0236547085201794	6.162596e-03	0.6337289	hsa:685,BTC,685:down|hsa:9150,CTDP1,9150:down|hsa:4659,PPP1R12A,4659:up|hsa:546,ATRX,546:up|hsa:11113,CIT,11113:up|hsa:54962,TIPIN,54962:up|hsa:1063,CENPF,1063:up|hsa:1950,EGF,1950:up|hsa:54069,MIS18A,54069:up|hsa:85444,LRRCC1,85444:up|hsa:10403,NDC80,10403:up|hsa:891,CCNB1,891:up|hsa:55055,ZWILCH,55055:up|hsa:55320,MIS18BP1,55320:up|hsa:57026,PDXP,57026:up|hsa:23363,OBSL1,23363:up|hsa:23607,CD2A…	http://amigo.geneontology.org/cgi-bin/amigo/term_details?term=GO:0007067
microtubule anchoring	Biological Process	GO:0034453	9	43	1438	17840	0.0062586926286509	0.00241031390134529	6.442324e-03	0.6337289	hsa:90417,KNSTRN,90417:up|hsa:11116,FGFR1OP,11116:up|hsa:9648,GCC2,9648:up|hsa:57662,CAMSAP3,57662:down|hsa:675,BRCA2,675:up|hsa:4751,NEK2,4751:down|hsa:10403,NDC80,10403:up|hsa:1062,CENPE,1062:up|hsa:891,CCNB1,891:up	http://amigo.geneontology.org/cgi-bin/amigo/term_details?term=GO:0034453
chromatin remodeling at centromere	Biological Process	GO:0031055	9	43	1438	17840	0.0062586926286509	0.00241031390134529	6.442324e-03	0.6337289	hsa:3070,HELLS,3070:up|hsa:54069,MIS18A,54069:up|hsa:4869,NPM1,4869:up|hsa:64105,CENPK,64105:up|hsa:51773,RSF1,51773:up|hsa:5928,RBBP4,5928:up|hsa:8467,SMARCA5,8467:up|hsa:378708,APITD1,378708:up|hsa:55320,MIS18BP1,55320:up	http://amigo.geneontology.org/cgi-bin/amigo/term_details?term=GO:0031055
positive regulation of histone H4-K16 acetylation	Biological Process	GO:2000620	2	2	1438	17840	0.00139082058414465	0.000112107623318386	6.493073e-03	0.6337289	hsa:672,BRCA1,672:up|hsa:26053,AUTS2,26053:up	http://amigo.geneontology.org/cgi-bin/amigo/term_details?term=GO:2000620
non-canonical Wnt signaling pathway involved in heart development	Biological Process	GO:0061341	2	2	1438	17840	0.00139082058414465	0.000112107623318386	6.493073e-03	0.6337289	hsa:57216,VANGL2,57216:up|hsa:7474,WNT5A,7474:up	http://amigo.geneontology.org/cgi-bin/amigo/term_details?term=GO:0061341
regulation of phosphatidylcholine biosynthetic process	Biological Process	GO:2001245	2	2	1438	17840	0.00139082058414465	0.000112107623318386	6.493073e-03	0.6337289	hsa:79888,LPCAT1,79888:up|hsa:2181,ACSL3,2181:up	http://amigo.geneontology.org/cgi-bin/amigo/term_details?term=GO:2001245
menaquinone catabolic process	Biological Process	GO:0042361	2	2	1438	17840	0.00139082058414465	0.000112107623318386	6.493073e-03	0.6337289	hsa:8529,CYP4F2,8529:up|hsa:57834,CYP4F11,57834:up	http://amigo.geneontology.org/cgi-bin/amigo/term_details?term=GO:0042361
positive regulation of high-density lipoprotein particle clearance	Biological Process	GO:0010983	2	2	1438	17840	0.00139082058414465	0.000112107623318386	6.493073e-03	0.6337289	hsa:9388,LIPG,9388:up|hsa:2822,GPLD1,2822:down	http://amigo.geneontology.org/cgi-bin/amigo/term_details?term=GO:0010983
vitamin K catabolic process	Biological Process	GO:0042377	2	2	1438	17840	0.00139082058414465	0.000112107623318386	6.493073e-03	0.6337289	hsa:8529,CYP4F2,8529:up|hsa:57834,CYP4F11,57834:up	http://amigo.geneontology.org/cgi-bin/amigo/term_details?term=GO:0042377
detection of triacyl bacterial lipopeptide	Biological Process	GO:0042495	2	2	1438	17840	0.00139082058414465	0.000112107623318386	6.493073e-03	0.6337289	hsa:7097,TLR2,7097:up|hsa:7096,TLR1,7096:up	http://amigo.geneontology.org/cgi-bin/amigo/term_details?term=GO:0042495
planar cell polarity pathway involved in heart morphogenesis	Biological Process	GO:0061346	2	2	1438	17840	0.00139082058414465	0.000112107623318386	6.493073e-03	0.6337289	hsa:57216,VANGL2,57216:up|hsa:7474,WNT5A,7474:up	http://amigo.geneontology.org/cgi-bin/amigo/term_details?term=GO:0061346
relaxation of skeletal muscle	Biological Process	GO:0090076	2	2	1438	17840	0.00139082058414465	0.000112107623318386	6.493073e-03	0.6337289	hsa:3759,KCNJ2,3759:down|hsa:487,ATP2A1,487:up	http://amigo.geneontology.org/cgi-bin/amigo/term_details?term=GO:0090076
actin rod assembly	Biological Process	GO:0031247	2	2	1438	17840	0.00139082058414465	0.000112107623318386	6.493073e-03	0.6337289	hsa:57026,PDXP,57026:up|hsa:7184,HSP90B1,7184:up	http://amigo.geneontology.org/cgi-bin/amigo/term_details?term=GO:0031247
regulation of nuclear division	Biological Process	GO:0051783	22	155	1438	17840	0.0152990264255911	0.00868834080717489	6.567404e-03	0.6337289	hsa:685,BTC,685:down|hsa:546,ATRX,546:up|hsa:1063,CENPF,1063:up|hsa:1950,EGF,1950:up|hsa:9585,KIF20B,9585:up|hsa:891,CCNB1,891:up|hsa:7474,WNT5A,7474:up|hsa:811,CALR,811:up|hsa:7175,TPR,7175:up|hsa:57026,PDXP,57026:up|hsa:23363,OBSL1,23363:up|hsa:146691,TOM1L2,146691:down|hsa:1104,RCC1,1104:up|hsa:113130,CDCA5,113130:up|hsa:3479,IGF1,3479:down|hsa:4751,NEK2,4751:down|hsa:2069,EREG,2069:down|hsa:6…	http://amigo.geneontology.org/cgi-bin/amigo/term_details?term=GO:0051783
positive regulation of interleukin-6 production	Biological Process	GO:0032755	12	67	1438	17840	0.00834492350486787	0.00375560538116592	6.770114e-03	0.6337289	hsa:27177,IL36B,27177:down|hsa:7097,TLR2,7097:up|hsa:1535,CYBA,1535:up|hsa:64170,CARD9,64170:up|hsa:2069,EREG,2069:down|hsa:2277,FIGF,2277:up|hsa:148022,TICAM1,148022:down|hsa:5603,MAPK13,5603:down|hsa:116,ADCYAP1,116:up|hsa:338322,NLRP10,338322:down|hsa:7096,TLR1,7096:up|hsa:7474,WNT5A,7474:up	http://amigo.geneontology.org/cgi-bin/amigo/term_details?term=GO:0032755
negative regulation of DNA-dependent DNA replication	Biological Process	GO:2000104	5	16	1438	17840	0.00347705146036161	0.000896860986547085	6.947526e-03	0.6337289	hsa:55294,FBXW7,55294:down|hsa:675,BRCA2,675:up|hsa:641,BLM,641:up|hsa:54962,TIPIN,54962:up|hsa:10735,STAG2,10735:up	http://amigo.geneontology.org/cgi-bin/amigo/term_details?term=GO:2000104
regulation of cell division	Biological Process	GO:0051302	33	262	1438	17840	0.0229485396383866	0.0146860986547085	6.983842e-03	0.6337289	hsa:685,BTC,685:down|hsa:546,ATRX,546:up|hsa:11113,CIT,11113:up|hsa:1063,CENPF,1063:up|hsa:1950,EGF,1950:up|hsa:891,CCNB1,891:up|hsa:641,BLM,641:up|hsa:7474,WNT5A,7474:up|hsa:5586,PKN2,5586:up|hsa:811,CALR,811:up|hsa:57026,PDXP,57026:up|hsa:9738,CCP110,9738:up|hsa:23363,OBSL1,23363:up|hsa:10628,TXNIP,10628:down|hsa:3479,IGF1,3479:down|hsa:4751,NEK2,4751:down|hsa:699,BUB1,699:up|hsa:5008,OSM,5008:…	http://amigo.geneontology.org/cgi-bin/amigo/term_details?term=GO:0051302
positive regulation of cartilage development	Biological Process	GO:0061036	7	29	1438	17840	0.00486787204450626	0.00162556053811659	7.014841e-03	0.6337289	hsa:860,RUNX2,860:up|hsa:652,BMP4,652:down|hsa:91461,PKDCC,91461:down|hsa:659,BMPR2,659:up|hsa:55553,SOX6,55553:down|hsa:6662,SOX9,6662:up|hsa:7474,WNT5A,7474:up	http://amigo.geneontology.org/cgi-bin/amigo/term_details?term=GO:0061036
cellular component assembly	Biological Process	GO:0022607	227	2425	1438	17840	0.157858136300417	0.135930493273543	7.126377e-03	0.6337289	hsa:6712,SPTBN2,6712:down|hsa:8936,WASF1,8936:up|hsa:10157,AASS,10157:up|hsa:1410,CRYAB,1410:down|hsa:546,ATRX,546:up|hsa:54869,EPS8L1,54869:down|hsa:7381,UQCRB,7381:up|hsa:57545,CC2D2A,57545:up|hsa:57505,AARS2,57505:up|hsa:1950,EGF,1950:up|hsa:25802,LMOD1,25802:down|hsa:140803,TRPM6,140803:up|hsa:50810,HDGFRP3,50810:up|hsa:1798,DPAGT1,1798:up|hsa:3646,EIF3E,3646:up|hsa:26160,IFT172,26160:up|hsa:…	http://amigo.geneontology.org/cgi-bin/amigo/term_details?term=GO:0022607
chromatin remodeling	Biological Process	GO:0006338	21	147	1438	17840	0.0146036161335188	0.00823991031390135	7.246257e-03	0.6337289	hsa:546,ATRX,546:up|hsa:6662,SOX9,6662:up|hsa:54069,MIS18A,54069:up|hsa:4869,NPM1,4869:up|hsa:64105,CENPK,64105:up|hsa:51773,RSF1,51773:up|hsa:55320,MIS18BP1,55320:up|hsa:11335,CBX3,11335:up|hsa:7175,TPR,7175:up|hsa:3070,HELLS,3070:up|hsa:676,BRDT,676:down|hsa:23198,PSME4,23198:up|hsa:9031,BAZ1B,9031:up|hsa:22890,ZBTB1,22890:up|hsa:10943,MSL3,10943:up|hsa:8467,SMARCA5,8467:up|hsa:5928,RBBP4,5928:…	http://amigo.geneontology.org/cgi-bin/amigo/term_details?term=GO:0006338
microtubule-based process	Biological Process	GO:0007017	65	595	1438	17840	0.045201668984701	0.0333520179372197	7.344324e-03	0.6337289	hsa:10142,AKAP9,10142:up|hsa:11116,FGFR1OP,11116:up|hsa:3797,KIF3C,3797:up|hsa:152110,NEK10,152110:up|hsa:10383,TUBB4B,10383:down|hsa:1410,CRYAB,1410:down|hsa:57545,CC2D2A,57545:up|hsa:10403,NDC80,10403:up|hsa:50810,HDGFRP3,50810:up|hsa:4869,NPM1,4869:up|hsa:26160,IFT172,26160:up|hsa:891,CCNB1,891:up|hsa:3925,STMN1,3925:up|hsa:6491,STIL,6491:up|hsa:3895,KTN1,3895:up|hsa:26054,SENP6,26054:up|hsa:7…	http://amigo.geneontology.org/cgi-bin/amigo/term_details?term=GO:0007017
G2/M transition of mitotic cell cycle	Biological Process	GO:0000086	25	185	1438	17840	0.0173852573018081	0.0103699551569507	7.417343e-03	0.6337289	hsa:3161,HMMR,3161:up|hsa:22995,CEP152,22995:up|hsa:10142,AKAP9,10142:up|hsa:11116,FGFR1OP,11116:up|hsa:80321,CEP70,80321:up|hsa:4659,PPP1R12A,4659:up|hsa:10383,TUBB4B,10383:down|hsa:1112,FOXN3,1112:down|hsa:1063,CENPF,1063:up|hsa:891,CCNB1,891:up|hsa:641,BLM,641:up|hsa:5218,CDK14,5218:up|hsa:9738,CCP110,9738:up|hsa:80184,CEP290,80184:up|hsa:11064,CNTRL,11064:up|hsa:22981,NINL,22981:up|hsa:10806,…	http://amigo.geneontology.org/cgi-bin/amigo/term_details?term=GO:0000086
cytoskeleton organization	Biological Process	GO:0007010	107	1058	1438	17840	0.0744089012517385	0.059304932735426	8.081924e-03	0.6337289	hsa:6712,SPTBN2,6712:down|hsa:10602,CDC42EP3,10602:up|hsa:10142,AKAP9,10142:up|hsa:11116,FGFR1OP,11116:up|hsa:8936,WASF1,8936:up|hsa:1410,CRYAB,1410:down|hsa:57545,CC2D2A,57545:up|hsa:25802,LMOD1,25802:down|hsa:10403,NDC80,10403:up|hsa:50810,HDGFRP3,50810:up|hsa:26160,IFT172,26160:up|hsa:4869,NPM1,4869:up|hsa:90167,FRMD7,90167:down|hsa:891,CCNB1,891:up|hsa:9378,NRXN1,9378:down|hsa:3925,STMN1,3925…	http://amigo.geneontology.org/cgi-bin/amigo/term_details?term=GO:0007010
keratinocyte proliferation	Biological Process	GO:0043616	8	37	1438	17840	0.00556328233657858	0.00207399103139013	8.171397e-03	0.6337289	hsa:7421,VDR,7421:up|hsa:195814,SDR16C5,195814:down|hsa:8573,CASK,8573:up|hsa:1515,CTSV,1515:up|hsa:2069,EREG,2069:down|hsa:3849,KRT2,3849:down|hsa:57152,SLURP1,57152:down|hsa:252983,STXBP4,252983:up	http://amigo.geneontology.org/cgi-bin/amigo/term_details?term=GO:0043616
regulation of heart rate by cardiac conduction	Biological Process	GO:0086091	7	30	1438	17840	0.00486787204450626	0.00168161434977578	8.526127e-03	0.6337289	hsa:10142,AKAP9,10142:up|hsa:3728,JUP,3728:down|hsa:1824,DSC2,1824:up|hsa:10021,HCN4,10021:up|hsa:3757,KCNH2,3757:up|hsa:3759,KCNJ2,3759:down|hsa:1829,DSG2,1829:up	http://amigo.geneontology.org/cgi-bin/amigo/term_details?term=GO:0086091
regulation of heart rate by chemical signal	Biological Process	GO:0003062	3	6	1438	17840	0.00208623087621697	0.000336322869955157	8.680796e-03	0.6337289	hsa:5144,PDE4D,5144:down|hsa:7168,TPM1,7168:up|hsa:3757,KCNH2,3757:up	http://amigo.geneontology.org/cgi-bin/amigo/term_details?term=GO:0003062
maintenance of DNA methylation	Biological Process	GO:0010216	3	6	1438	17840	0.00208623087621697	0.000336322869955157	8.680796e-03	0.6337289	hsa:3070,HELLS,3070:up|hsa:1786,DNMT1,1786:up|hsa:29128,UHRF1,29128:up	http://amigo.geneontology.org/cgi-bin/amigo/term_details?term=GO:0010216
replication fork protection	Biological Process	GO:0048478	3	6	1438	17840	0.00208623087621697	0.000336322869955157	8.680796e-03	0.6337289	hsa:675,BRCA2,675:up|hsa:641,BLM,641:up|hsa:54962,TIPIN,54962:up	http://amigo.geneontology.org/cgi-bin/amigo/term_details?term=GO:0048478
cellular response to interleukin-2	Biological Process	GO:0071352	3	6	1438	17840	0.00208623087621697	0.000336322869955157	8.680796e-03	0.6337289	hsa:5771,PTPN2,5771:up|hsa:3559,IL2RA,3559:up|hsa:3561,IL2RG,3561:up	http://amigo.geneontology.org/cgi-bin/amigo/term_details?term=GO:0071352
regulation of branching involved in lung morphogenesis	Biological Process	GO:0061046	3	6	1438	17840	0.00208623087621697	0.000336322869955157	8.680796e-03	0.6337289	hsa:652,BMP4,652:down|hsa:6662,SOX9,6662:up|hsa:7482,WNT2B,7482:down	http://amigo.geneontology.org/cgi-bin/amigo/term_details?term=GO:0061046
bundle of His cell-Purkinje myocyte adhesion involved in cell communication	Biological Process	GO:0086073	3	6	1438	17840	0.00208623087621697	0.000336322869955157	8.680796e-03	0.6337289	hsa:3728,JUP,3728:down|hsa:1824,DSC2,1824:up|hsa:1829,DSG2,1829:up	http://amigo.geneontology.org/cgi-bin/amigo/term_details?term=GO:0086073
fructose 1,6-bisphosphate metabolic process	Biological Process	GO:0030388	3	6	1438	17840	0.00208623087621697	0.000336322869955157	8.680796e-03	0.6337289	hsa:57103,TIGAR,57103:up|hsa:229,ALDOB,229:down|hsa:230,ALDOC,230:down	http://amigo.geneontology.org/cgi-bin/amigo/term_details?term=GO:0030388
cardiac muscle cell-cardiac muscle cell adhesion	Biological Process	GO:0086042	3	6	1438	17840	0.00208623087621697	0.000336322869955157	8.680796e-03	0.6337289	hsa:3728,JUP,3728:down|hsa:1824,DSC2,1824:up|hsa:1829,DSG2,1829:up	http://amigo.geneontology.org/cgi-bin/amigo/term_details?term=GO:0086042
membranous septum morphogenesis	Biological Process	GO:0003149	3	6	1438	17840	0.00208623087621697	0.000336322869955157	8.680796e-03	0.6337289	hsa:7468,WHSC1,7468:up|hsa:2535,FZD2,2535:up|hsa:57216,VANGL2,57216:up	http://amigo.geneontology.org/cgi-bin/amigo/term_details?term=GO:0003149
regulation of histone H4 acetylation	Biological Process	GO:0090239	4	11	1438	17840	0.00278164116828929	0.000616591928251121	8.749962e-03	0.6337289	hsa:672,BRCA1,672:up|hsa:9474,ATG5,9474:up|hsa:55677,IWS1,55677:up|hsa:26053,AUTS2,26053:up	http://amigo.geneontology.org/cgi-bin/amigo/term_details?term=GO:0090239
regulation of endothelial cell development	Biological Process	GO:1901550	4	11	1438	17840	0.00278164116828929	0.000616591928251121	8.749962e-03	0.6337289	hsa:7122,CLDN5,7122:down|hsa:6093,ROCK1,6093:up|hsa:9475,ROCK2,9475:up|hsa:1903,S1PR3,1903:up	http://amigo.geneontology.org/cgi-bin/amigo/term_details?term=GO:1901550
positive regulation of receptor biosynthetic process	Biological Process	GO:0010870	4	11	1438	17840	0.00278164116828929	0.000616591928251121	8.749962e-03	0.6337289	hsa:10330,CNPY2,10330:up|hsa:3091,HIF1A,3091:up|hsa:3066,HDAC2,3066:up|hsa:3202,HOXA5,3202:down	http://amigo.geneontology.org/cgi-bin/amigo/term_details?term=GO:0010870
regulation of establishment of endothelial barrier	Biological Process	GO:1903140	4	11	1438	17840	0.00278164116828929	0.000616591928251121	8.749962e-03	0.6337289	hsa:7122,CLDN5,7122:down|hsa:6093,ROCK1,6093:up|hsa:9475,ROCK2,9475:up|hsa:1903,S1PR3,1903:up	http://amigo.geneontology.org/cgi-bin/amigo/term_details?term=GO:1903140
intestinal epithelial cell development	Biological Process	GO:0060576	4	11	1438	17840	0.00278164116828929	0.000616591928251121	8.749962e-03	0.6337289	hsa:688,KLF5,688:down|hsa:57103,TIGAR,57103:up|hsa:3091,HIF1A,3091:up|hsa:3202,HOXA5,3202:down	http://amigo.geneontology.org/cgi-bin/amigo/term_details?term=GO:0060576
positive regulation of epidermal growth factor-activated receptor activity	Biological Process	GO:0045741	4	11	1438	17840	0.00278164116828929	0.000616591928251121	8.749962e-03	0.6337289	hsa:55294,FBXW7,55294:down|hsa:1950,EGF,1950:up|hsa:9148,NEURL1,9148:down|hsa:2069,EREG,2069:down	http://amigo.geneontology.org/cgi-bin/amigo/term_details?term=GO:0045741
protein folding	Biological Process	GO:0006457	27	208	1438	17840	0.0187760778859527	0.0116591928251121	9.400094e-03	0.6731420	hsa:10576,CCT2,10576:up|hsa:10808,HSPH1,10808:up|hsa:7184,HSP90B1,7184:up|hsa:1410,CRYAB,1410:down|hsa:150274,HSCB,150274:up|hsa:5082,PDCL,5082:up|hsa:3301,DNAJA1,3301:up|hsa:9141,PDCD5,9141:up|hsa:9403,SEP15,9403:up|hsa:2287,FKBP3,2287:up|hsa:51303,FKBP11,51303:up|hsa:2770,GNAI1,2770:down|hsa:9601,PDIA4,9601:up|hsa:811,CALR,811:up|hsa:22948,CCT5,22948:up|hsa:8787,RGS9,8787:down|hsa:54431,DNAJC10…	http://amigo.geneontology.org/cgi-bin/amigo/term_details?term=GO:0006457
regulation of mitotic nuclear division	Biological Process	GO:0007088	19	132	1438	17840	0.0132127955493741	0.00739910313901345	9.524554e-03	0.6731420	hsa:685,BTC,685:down|hsa:546,ATRX,546:up|hsa:1063,CENPF,1063:up|hsa:1950,EGF,1950:up|hsa:9585,KIF20B,9585:up|hsa:891,CCNB1,891:up|hsa:7175,TPR,7175:up|hsa:57026,PDXP,57026:up|hsa:23363,OBSL1,23363:up|hsa:146691,TOM1L2,146691:down|hsa:1104,RCC1,1104:up|hsa:113130,CDCA5,113130:up|hsa:3479,IGF1,3479:down|hsa:4751,NEK2,4751:down|hsa:2069,EREG,2069:down|hsa:699,BUB1,699:up|hsa:1062,CENPE,1062:up|hsa:6…	http://amigo.geneontology.org/cgi-bin/amigo/term_details?term=GO:0007088
striated muscle contraction	Biological Process	GO:0006941	21	151	1438	17840	0.0146036161335188	0.00846412556053812	9.774910e-03	0.6731420	hsa:3728,JUP,3728:down|hsa:70,ACTC1,70:down|hsa:3759,KCNJ2,3759:down|hsa:4878,NPPA,4878:up|hsa:7135,TNNI1,7135:up|hsa:154,ADRB2,154:down|hsa:10021,HCN4,10021:up|hsa:3757,KCNH2,3757:up|hsa:1134,CHRNA1,1134:up|hsa:487,ATP2A1,487:up|hsa:1113,CHGA,1113:up|hsa:9456,HOMER1,9456:up|hsa:7852,CXCR4,7852:up|hsa:1824,DSC2,1824:up|hsa:1829,DSG2,1829:up|hsa:6548,SLC9A1,6548:down|hsa:51086,TNNI3K,51086:down|hs…	http://amigo.geneontology.org/cgi-bin/amigo/term_details?term=GO:0006941
regulation of chondrocyte differentiation	Biological Process	GO:0032330	9	46	1438	17840	0.0062586926286509	0.00257847533632287	1.012977e-02	0.6731420	hsa:26585,GREM1,26585:down|hsa:860,RUNX2,860:up|hsa:6662,SOX9,6662:up|hsa:91461,PKDCC,91461:down|hsa:652,BMP4,652:down|hsa:359845,FAM101B,359845:up|hsa:4094,MAF,4094:down|hsa:55553,SOX6,55553:down|hsa:85477,SCIN,85477:down	http://amigo.geneontology.org/cgi-bin/amigo/term_details?term=GO:0032330
cardiac muscle cell development	Biological Process	GO:0055013	10	54	1438	17840	0.00695410292072323	0.00302690582959641	1.020260e-02	0.6731420	hsa:9150,CTDP1,9150:down|hsa:23363,OBSL1,23363:up|hsa:70,ACTC1,70:down|hsa:10529,NEBL,10529:down|hsa:4878,NPPA,4878:up|hsa:652,BMP4,652:down|hsa:891,CCNB1,891:up|hsa:9474,ATG5,9474:up|hsa:91624,NEXN,91624:up|hsa:4629,MYH11,4629:down	http://amigo.geneontology.org/cgi-bin/amigo/term_details?term=GO:0055013
ventricular septum development	Biological Process	GO:0003281	10	54	1438	17840	0.00695410292072323	0.00302690582959641	1.020260e-02	0.6731420	hsa:4052,LTBP1,4052:up|hsa:57167,SALL4,57167:down|hsa:8543,LMO4,8543:up|hsa:199699,DAND5,199699:up|hsa:7468,WHSC1,7468:up|hsa:64220,STRA6,64220:up|hsa:9321,TRIP11,9321:up|hsa:2535,FZD2,2535:up|hsa:57216,VANGL2,57216:up|hsa:7474,WNT5A,7474:up	http://amigo.geneontology.org/cgi-bin/amigo/term_details?term=GO:0003281
DNA-dependent DNA replication maintenance of fidelity	Biological Process	GO:0045005	6	24	1438	17840	0.00417246175243394	0.00134529147982063	1.031589e-02	0.6731420	hsa:259282,BOD1L1,259282:up|hsa:675,BRCA2,675:up|hsa:641,BLM,641:up|hsa:378708,APITD1,378708:up|hsa:546,ATRX,546:up|hsa:54962,TIPIN,54962:up	http://amigo.geneontology.org/cgi-bin/amigo/term_details?term=GO:0045005
cardiac ventricle development	Biological Process	GO:0003231	16	106	1438	17840	0.0111265646731572	0.00594170403587444	1.068854e-02	0.6731420	hsa:4052,LTBP1,4052:up|hsa:57167,SALL4,57167:down|hsa:157378,TMEM65,157378:up|hsa:7468,WHSC1,7468:up|hsa:7135,TNNI1,7135:up|hsa:9321,TRIP11,9321:up|hsa:2535,FZD2,2535:up|hsa:57216,VANGL2,57216:up|hsa:2296,FOXC1,2296:up|hsa:7474,WNT5A,7474:up|hsa:3091,HIF1A,3091:up|hsa:8543,LMO4,8543:up|hsa:199699,DAND5,199699:up|hsa:3776,KCNK2,3776:up|hsa:64220,STRA6,64220:up|hsa:7168,TPM1,7168:up	http://amigo.geneontology.org/cgi-bin/amigo/term_details?term=GO:0003231
cellular response to mechanical stimulus	Biological Process	GO:0071260	13	80	1438	17840	0.0090403337969402	0.00448430493273543	1.124392e-02	0.6731420	hsa:1535,CYBA,1535:up|hsa:3759,KCNJ2,3759:down|hsa:3091,HIF1A,3091:up|hsa:1508,CTSB,1508:up|hsa:4878,NPPA,4878:up|hsa:6662,SOX9,6662:up|hsa:5734,PTGER4,5734:up|hsa:835,CASP2,835:up|hsa:6548,SLC9A1,6548:down|hsa:1265,CNN2,1265:up|hsa:652,BMP4,652:down|hsa:841,CASP8,841:up|hsa:9994,CASP8AP2,9994:up	http://amigo.geneontology.org/cgi-bin/amigo/term_details?term=GO:0071260
regulation of cartilage development	Biological Process	GO:0061035	11	63	1438	17840	0.00764951321279555	0.00353139013452915	1.125518e-02	0.6731420	hsa:26585,GREM1,26585:down|hsa:860,RUNX2,860:up|hsa:659,BMPR2,659:up|hsa:6662,SOX9,6662:up|hsa:652,BMP4,652:down|hsa:91461,PKDCC,91461:down|hsa:4094,MAF,4094:down|hsa:359845,FAM101B,359845:up|hsa:55553,SOX6,55553:down|hsa:85477,SCIN,85477:down|hsa:7474,WNT5A,7474:up	http://amigo.geneontology.org/cgi-bin/amigo/term_details?term=GO:0061035
positive regulation of protein tyrosine kinase activity	Biological Process	GO:0061098	8	39	1438	17840	0.00556328233657858	0.00218609865470852	1.128730e-02	0.6731420	hsa:10808,HSPH1,10808:up|hsa:26585,GREM1,26585:down|hsa:100133941,CD24,100133941:up|hsa:1950,EGF,1950:up|hsa:2069,EREG,2069:down|hsa:55294,FBXW7,55294:down|hsa:2065,ERBB3,2065:down|hsa:9148,NEURL1,9148:down	http://amigo.geneontology.org/cgi-bin/amigo/term_details?term=GO:0061098
positive regulation of hormone secretion	Biological Process	GO:0046887	17	116	1438	17840	0.0118219749652295	0.00650224215246637	1.155010e-02	0.6731420	hsa:114899,C1QTNF3,114899:down|hsa:222546,RFX6,222546:down|hsa:5734,PTGER4,5734:up|hsa:7447,VSNL1,7447:up|hsa:2266,FGG,2266:down|hsa:5532,PPP3CB,5532:up|hsa:116,ADCYAP1,116:up|hsa:18,ABAT,18:up|hsa:4925,NUCB2,4925:up|hsa:5213,PFKM,5213:up|hsa:2822,GPLD1,2822:down|hsa:8723,SNX4,8723:up|hsa:3091,HIF1A,3091:up|hsa:668,FOXL2,668:up|hsa:3717,JAK2,3717:up|hsa:2244,FGB,2244:down|hsa:169026,SLC30A8,16902…	http://amigo.geneontology.org/cgi-bin/amigo/term_details?term=GO:0046887
cardiac muscle contraction	Biological Process	GO:0060048	17	116	1438	17840	0.0118219749652295	0.00650224215246637	1.155010e-02	0.6731420	hsa:3728,JUP,3728:down|hsa:70,ACTC1,70:down|hsa:3759,KCNJ2,3759:down|hsa:4878,NPPA,4878:up|hsa:7135,TNNI1,7135:up|hsa:3757,KCNH2,3757:up|hsa:10021,HCN4,10021:up|hsa:1113,CHGA,1113:up|hsa:7852,CXCR4,7852:up|hsa:1824,DSC2,1824:up|hsa:1829,DSG2,1829:up|hsa:6548,SLC9A1,6548:down|hsa:51086,TNNI3K,51086:down|hsa:3320,HSP90AA1,3320:up|hsa:5144,PDE4D,5144:down|hsa:7168,TPM1,7168:up|hsa:6781,STC1,6781:up	http://amigo.geneontology.org/cgi-bin/amigo/term_details?term=GO:0060048
T cell apoptotic process	Biological Process	GO:0070231	9	47	1438	17840	0.0062586926286509	0.00263452914798206	1.165627e-02	0.6731420	hsa:5133,PDCD1,5133:up|hsa:57864,SLC46A2,57864:down|hsa:3958,LGALS3,3958:down|hsa:3091,HIF1A,3091:up|hsa:9093,DNAJA3,9093:up|hsa:3559,IL2RA,3559:up|hsa:652,BMP4,652:down|hsa:10018,BCL2L11,10018:up|hsa:7474,WNT5A,7474:up	http://amigo.geneontology.org/cgi-bin/amigo/term_details?term=GO:0070231
regulation of striated muscle contraction	Biological Process	GO:0006942	15	98	1438	17840	0.0104311543810848	0.0054932735426009	1.166017e-02	0.6731420	hsa:3728,JUP,3728:down|hsa:1824,DSC2,1824:up|hsa:3759,KCNJ2,3759:down|hsa:4878,NPPA,4878:up|hsa:1829,DSG2,1829:up|hsa:6548,SLC9A1,6548:down|hsa:51086,TNNI3K,51086:down|hsa:7135,TNNI1,7135:up|hsa:5144,PDE4D,5144:down|hsa:3320,HSP90AA1,3320:up|hsa:3757,KCNH2,3757:up|hsa:10021,HCN4,10021:up|hsa:487,ATP2A1,487:up|hsa:6781,STC1,6781:up|hsa:1113,CHGA,1113:up	http://amigo.geneontology.org/cgi-bin/amigo/term_details?term=GO:0006942
regulation of cellular component biogenesis	Biological Process	GO:0044087	77	739	1438	17840	0.0535465924895688	0.0414237668161435	1.168334e-02	0.6731420	hsa:6712,SPTBN2,6712:down|hsa:10602,CDC42EP3,10602:up|hsa:9637,FEZ2,9637:up|hsa:64284,RAB17,64284:up|hsa:8936,WASF1,8936:up|hsa:54869,EPS8L1,54869:down|hsa:25802,LMOD1,25802:down|hsa:4869,NPM1,4869:up|hsa:90167,FRMD7,90167:down|hsa:112755,STX1B,112755:up|hsa:9378,NRXN1,9378:down|hsa:3925,STMN1,3925:up|hsa:637,BID,637:up|hsa:55329,MNS1,55329:up|hsa:7474,WNT5A,7474:up|hsa:85477,SCIN,85477:down|hsa:…	http://amigo.geneontology.org/cgi-bin/amigo/term_details?term=GO:0044087
uterus development	Biological Process	GO:0060065	5	18	1438	17840	0.00347705146036161	0.00100896860986547	1.190638e-02	0.6731420	hsa:64220,STRA6,64220:up|hsa:3205,HOXA9,3205:down|hsa:668,FOXL2,668:up|hsa:7474,WNT5A,7474:up|hsa:3206,HOXA10,3206:down	http://amigo.geneontology.org/cgi-bin/amigo/term_details?term=GO:0060065
blastocyst growth	Biological Process	GO:0001832	5	18	1438	17840	0.00347705146036161	0.00100896860986547	1.190638e-02	0.6731420	hsa:9837,GINS1,9837:up|hsa:675,BRCA2,675:up|hsa:57167,SALL4,57167:down|hsa:642623,UBTFL1,642623:down|hsa:3479,IGF1,3479:down	http://amigo.geneontology.org/cgi-bin/amigo/term_details?term=GO:0001832
notochord development	Biological Process	GO:0030903	5	18	1438	17840	0.00347705146036161	0.00100896860986547	1.190638e-02	0.6731420	hsa:6491,STIL,6491:up|hsa:23242,COBL,23242:down|hsa:6662,SOX9,6662:up|hsa:2735,GLI1,2735:up|hsa:7474,WNT5A,7474:up	http://amigo.geneontology.org/cgi-bin/amigo/term_details?term=GO:0030903
microvillus assembly	Biological Process	GO:0030033	5	18	1438	17840	0.00347705146036161	0.00100896860986547	1.190638e-02	0.6731420	hsa:2054,STX2,2054:up|hsa:688,KLF5,688:down|hsa:5337,PLD1,5337:down|hsa:6624,FSCN1,6624:up|hsa:5911,RAP2A,5911:up	http://amigo.geneontology.org/cgi-bin/amigo/term_details?term=GO:0030033
epithelial cell differentiation	Biological Process	GO:0030855	61	566	1438	17840	0.0424200278164117	0.0317264573991031	1.205999e-02	0.6731420	hsa:23086,EXPH5,23086:down|hsa:2054,STX2,2054:up|hsa:56647,BCCIP,56647:up|hsa:7122,CLDN5,7122:down|hsa:90,ACVR1,90:up|hsa:353132,LCE1B,353132:down|hsa:3958,LGALS3,3958:down|hsa:659,BMPR2,659:up|hsa:546,ATRX,546:up|hsa:1508,CTSB,1508:up|hsa:83605,CCM2,83605:up|hsa:6662,SOX9,6662:up|hsa:353139,LCE2A,353139:down|hsa:2125,EVPL,2125:down|hsa:2535,FZD2,2535:up|hsa:353131,LCE1A,353131:down|hsa:7474,WNT5…	http://amigo.geneontology.org/cgi-bin/amigo/term_details?term=GO:0030855
response to X-ray	Biological Process	GO:0010165	7	32	1438	17840	0.00486787204450626	0.00179372197309417	1.224463e-02	0.6731420	hsa:675,BRCA2,675:up|hsa:641,BLM,641:up|hsa:121457,IKBIP,121457:up|hsa:5366,PMAIP1,5366:up|hsa:7518,XRCC4,7518:up|hsa:3091,HIF1A,3091:up|hsa:7158,TP53BP1,7158:up	http://amigo.geneontology.org/cgi-bin/amigo/term_details?term=GO:0010165
endoplasmic reticulum tubular network organization	Biological Process	GO:0071786	4	12	1438	17840	0.00278164116828929	0.000672645739910314	1.229816e-02	0.6731420	hsa:51308,REEP2,51308:up|hsa:65055,REEP1,65055:up|hsa:23204,ARL6IP1,23204:up|hsa:55161,TMEM33,55161:up	http://amigo.geneontology.org/cgi-bin/amigo/term_details?term=GO:0071786
regulation of nucleobase-containing compound transport	Biological Process	GO:0032239	4	12	1438	17840	0.00278164116828929	0.000672645739910314	1.229816e-02	0.6731420	hsa:22916,NCBP2,22916:up|hsa:7175,TPR,7175:up|hsa:11163,NUDT4,11163:up|hsa:55677,IWS1,55677:up	http://amigo.geneontology.org/cgi-bin/amigo/term_details?term=GO:0032239
bundle of His cell to Purkinje myocyte communication	Biological Process	GO:0086069	4	12	1438	17840	0.00278164116828929	0.000672645739910314	1.229816e-02	0.6731420	hsa:51086,TNNI3K,51086:down|hsa:3728,JUP,3728:down|hsa:1824,DSC2,1824:up|hsa:1829,DSG2,1829:up	http://amigo.geneontology.org/cgi-bin/amigo/term_details?term=GO:0086069
attachment of spindle microtubules to kinetochore	Biological Process	GO:0008608	6	25	1438	17840	0.00417246175243394	0.00140134529147982	1.266765e-02	0.6731420	hsa:90417,KNSTRN,90417:up|hsa:1062,CENPE,1062:up|hsa:675,BRCA2,675:up|hsa:891,CCNB1,891:up|hsa:4751,NEK2,4751:down|hsa:10403,NDC80,10403:up	http://amigo.geneontology.org/cgi-bin/amigo/term_details?term=GO:0008608
regulation of DNA metabolic process	Biological Process	GO:0051052	40	345	1438	17840	0.0278164116828929	0.0193385650224215	1.270860e-02	0.6731420	hsa:114799,ESCO1,114799:up|hsa:659,BMPR2,659:up|hsa:54737,MPHOSPH8,54737:up|hsa:546,ATRX,546:up|hsa:4142,MAS1,4142:down|hsa:54962,TIPIN,54962:up|hsa:1602,DACH1,1602:up|hsa:54069,MIS18A,54069:up|hsa:157570,ESCO2,157570:up|hsa:4869,NPM1,4869:up|hsa:641,BLM,641:up|hsa:22948,CCT5,22948:up|hsa:811,CALR,811:up|hsa:401720,FIGNL2,401720:up|hsa:7153,TOP2A,7153:up|hsa:466,ATF1,466:up|hsa:57103,TIGAR,57103:…	http://amigo.geneontology.org/cgi-bin/amigo/term_details?term=GO:0051052
cardiac cell development	Biological Process	GO:0055006	10	56	1438	17840	0.00695410292072323	0.0031390134529148	1.312304e-02	0.6731420	hsa:9150,CTDP1,9150:down|hsa:23363,OBSL1,23363:up|hsa:70,ACTC1,70:down|hsa:10529,NEBL,10529:down|hsa:4878,NPPA,4878:up|hsa:652,BMP4,652:down|hsa:891,CCNB1,891:up|hsa:9474,ATG5,9474:up|hsa:91624,NEXN,91624:up|hsa:4629,MYH11,4629:down	http://amigo.geneontology.org/cgi-bin/amigo/term_details?term=GO:0055006
positive regulation of protein transport	Biological Process	GO:0051222	50	452	1438	17840	0.0347705146036161	0.0253363228699552	1.380458e-02	0.6731420	hsa:23086,EXPH5,23086:down|hsa:26253,CLEC4E,26253:down|hsa:3728,JUP,3728:down|hsa:114899,C1QTNF3,114899:down|hsa:1950,EGF,1950:up|hsa:54069,MIS18A,54069:up|hsa:3843,IPO5,3843:up|hsa:2266,FGG,2266:down|hsa:5532,PPP3CB,5532:up|hsa:18,ABAT,18:up|hsa:9141,PDCD5,9141:up|hsa:338322,NLRP10,338322:down|hsa:24145,PANX1,24145:up|hsa:7474,WNT5A,7474:up|hsa:55540,IL17RB,55540:up|hsa:163882,CNST,163882:down|h…	http://amigo.geneontology.org/cgi-bin/amigo/term_details?term=GO:0051222
meiotic cell cycle	Biological Process	GO:0051321	26	205	1438	17840	0.0180806675938804	0.0114910313901345	1.413685e-02	0.6731420	hsa:84501,SPIRE2,84501:up|hsa:259266,ASPM,259266:up|hsa:4882,NPR2,4882:down|hsa:10735,STAG2,10735:up|hsa:7155,TOP2B,7155:up|hsa:54456,MOV10L1,54456:up|hsa:10592,SMC2,10592:up|hsa:84690,SPATA22,84690:down|hsa:2175,FANCA,2175:up|hsa:55329,MNS1,55329:up|hsa:7474,WNT5A,7474:up|hsa:136991,ASZ1,136991:down|hsa:811,CALR,811:up|hsa:7153,TOP2A,7153:up|hsa:675,BRCA2,675:up|hsa:151246,SGO2,151246:up|hsa:676…	http://amigo.geneontology.org/cgi-bin/amigo/term_details?term=GO:0051321
regulation of muscle contraction	Biological Process	GO:0006937	22	166	1438	17840	0.0152990264255911	0.00930493273542601	1.423963e-02	0.6731420	hsa:3728,JUP,3728:down|hsa:3759,KCNJ2,3759:down|hsa:4878,NPPA,4878:up|hsa:5734,PTGER4,5734:up|hsa:7135,TNNI1,7135:up|hsa:154,ADRB2,154:down|hsa:18,ABAT,18:up|hsa:10021,HCN4,10021:up|hsa:3757,KCNH2,3757:up|hsa:487,ATP2A1,487:up|hsa:1113,CHGA,1113:up|hsa:1824,DSC2,1824:up|hsa:1829,DSG2,1829:up|hsa:6548,SLC9A1,6548:down|hsa:4660,PPP1R12B,4660:down|hsa:5742,PTGS1,5742:down|hsa:51086,TNNI3K,51086:down…	http://amigo.geneontology.org/cgi-bin/amigo/term_details?term=GO:0006937
positive regulation of cellular protein localization	Biological Process	GO:1903829	41	358	1438	17840	0.0285118219749652	0.020067264573991	1.424991e-02	0.6731420	hsa:3728,JUP,3728:down|hsa:1950,EGF,1950:up|hsa:54069,MIS18A,54069:up|hsa:3843,IPO5,3843:up|hsa:9451,EIF2AK3,9451:up|hsa:5532,PPP3CB,5532:up|hsa:891,CCNB1,891:up|hsa:9141,PDCD5,9141:up|hsa:637,BID,637:up|hsa:22948,CCT5,22948:up|hsa:3799,KIF5B,3799:up|hsa:163882,CNST,163882:down|hsa:23607,CD2AP,23607:up|hsa:5366,PMAIP1,5366:up|hsa:80184,CEP290,80184:up|hsa:5584,PRKCI,5584:up|hsa:3479,IGF1,3479:dow…	http://amigo.geneontology.org/cgi-bin/amigo/term_details?term=GO:1903829
positive regulation of mucus secretion	Biological Process	GO:0070257	3	7	1438	17840	0.00208623087621697	0.00039237668161435	1.428659e-02	0.6731420	hsa:9474,ATG5,9474:up|hsa:1535,CYBA,1535:up|hsa:5734,PTGER4,5734:up	http://amigo.geneontology.org/cgi-bin/amigo/term_details?term=GO:0070257
regulation of microvillus assembly	Biological Process	GO:0032534	3	7	1438	17840	0.00208623087621697	0.00039237668161435	1.428659e-02	0.6731420	hsa:688,KLF5,688:down|hsa:5337,PLD1,5337:down|hsa:6624,FSCN1,6624:up	http://amigo.geneontology.org/cgi-bin/amigo/term_details?term=GO:0032534
C-terminal protein lipidation	Biological Process	GO:0006501	3	7	1438	17840	0.00208623087621697	0.00039237668161435	1.428659e-02	0.6731420	hsa:9140,ATG12,9140:up|hsa:84938,ATG4C,84938:up|hsa:9474,ATG5,9474:up	http://amigo.geneontology.org/cgi-bin/amigo/term_details?term=GO:0006501
regulation of myosin-light-chain-phosphatase activity	Biological Process	GO:0035507	3	7	1438	17840	0.00208623087621697	0.00039237668161435	1.428659e-02	0.6731420	hsa:6093,ROCK1,6093:up|hsa:4659,PPP1R12A,4659:up|hsa:9475,ROCK2,9475:up	http://amigo.geneontology.org/cgi-bin/amigo/term_details?term=GO:0035507
pyridine-containing compound catabolic process	Biological Process	GO:0072526	3	7	1438	17840	0.00208623087621697	0.00039237668161435	1.428659e-02	0.6731420	hsa:57026,PDXP,57026:up|hsa:57103,TIGAR,57103:up|hsa:83594,NUDT12,83594:up	http://amigo.geneontology.org/cgi-bin/amigo/term_details?term=GO:0072526
circadian regulation of gene expression	Biological Process	GO:0032922	10	57	1438	17840	0.00695410292072323	0.00319506726457399	1.479912e-02	0.6731420	hsa:5187,PER1,5187:down|hsa:79365,BHLHE41,79365:up|hsa:148523,CIART,148523:down|hsa:1408,CRY2,1408:down|hsa:10743,RAI1,10743:down|hsa:9572,NR1D1,9572:down|hsa:6095,RORA,6095:down|hsa:3066,HDAC2,3066:up|hsa:1390,CREM,1390:up|hsa:7150,TOP1,7150:up	http://amigo.geneontology.org/cgi-bin/amigo/term_details?term=GO:0032922
corticosteroid receptor signaling pathway	Biological Process	GO:0031958	5	19	1438	17840	0.00347705146036161	0.00106502242152466	1.510749e-02	0.6731420	hsa:811,CALR,811:up|hsa:3717,JAK2,3717:up|hsa:1408,CRY2,1408:down|hsa:55885,LMO3,55885:up|hsa:5187,PER1,5187:down	http://amigo.geneontology.org/cgi-bin/amigo/term_details?term=GO:0031958
asymmetric protein localization	Biological Process	GO:0008105	5	19	1438	17840	0.00347705146036161	0.00106502242152466	1.510749e-02	0.6731420	hsa:79659,DYNC2H1,79659:up|hsa:57216,VANGL2,57216:up|hsa:8292,COLQ,8292:up|hsa:57120,GOPC,57120:up|hsa:378,ARF4,378:up	http://amigo.geneontology.org/cgi-bin/amigo/term_details?term=GO:0008105
cofactor catabolic process	Biological Process	GO:0051187	5	19	1438	17840	0.00347705146036161	0.00106502242152466	1.510749e-02	0.6731420	hsa:57026,PDXP,57026:up|hsa:57103,TIGAR,57103:up|hsa:8529,CYP4F2,8529:up|hsa:57834,CYP4F11,57834:up|hsa:83594,NUDT12,83594:up	http://amigo.geneontology.org/cgi-bin/amigo/term_details?term=GO:0051187
ER-nucleus signaling pathway	Biological Process	GO:0006984	8	41	1438	17840	0.00556328233657858	0.00229820627802691	1.520116e-02	0.6731420	hsa:5771,PTPN2,5771:up|hsa:811,CALR,811:up|hsa:51141,INSIG2,51141:up|hsa:7184,HSP90B1,7184:up|hsa:11160,ERLIN2,11160:up|hsa:9451,EIF2AK3,9451:up|hsa:55294,FBXW7,55294:down|hsa:55161,TMEM33,55161:up	http://amigo.geneontology.org/cgi-bin/amigo/term_details?term=GO:0006984
CENP-A containing chromatin organization	Biological Process	GO:0061641	8	41	1438	17840	0.00556328233657858	0.00229820627802691	1.520116e-02	0.6731420	hsa:54069,MIS18A,54069:up|hsa:4869,NPM1,4869:up|hsa:64105,CENPK,64105:up|hsa:51773,RSF1,51773:up|hsa:5928,RBBP4,5928:up|hsa:8467,SMARCA5,8467:up|hsa:378708,APITD1,378708:up|hsa:55320,MIS18BP1,55320:up	http://amigo.geneontology.org/cgi-bin/amigo/term_details?term=GO:0061641
CENP-A containing nucleosome assembly	Biological Process	GO:0034080	8	41	1438	17840	0.00556328233657858	0.00229820627802691	1.520116e-02	0.6731420	hsa:54069,MIS18A,54069:up|hsa:4869,NPM1,4869:up|hsa:64105,CENPK,64105:up|hsa:51773,RSF1,51773:up|hsa:5928,RBBP4,5928:up|hsa:8467,SMARCA5,8467:up|hsa:378708,APITD1,378708:up|hsa:55320,MIS18BP1,55320:up	http://amigo.geneontology.org/cgi-bin/amigo/term_details?term=GO:0034080
lung alveolus development	Biological Process	GO:0048286	8	41	1438	17840	0.00556328233657858	0.00229820627802691	1.520116e-02	0.6731420	hsa:659,BMPR2,659:up|hsa:3202,HOXA5,3202:down|hsa:9678,PHF14,9678:up|hsa:64220,STRA6,64220:up|hsa:91461,PKDCC,91461:down|hsa:652,BMP4,652:down|hsa:7474,WNT5A,7474:up|hsa:84525,HOPX,84525:down	http://amigo.geneontology.org/cgi-bin/amigo/term_details?term=GO:0048286
cellular protein localization	Biological Process	GO:0034613	148	1551	1438	17840	0.102920723226704	0.0869394618834081	1.558373e-02	0.6731420	hsa:23086,EXPH5,23086:down|hsa:11116,FGFR1OP,11116:up|hsa:10527,IPO7,10527:up|hsa:546,ATRX,546:up|hsa:1950,EGF,1950:up|hsa:10403,NDC80,10403:up|hsa:112609,MRAP2,112609:up|hsa:4869,NPM1,4869:up|hsa:891,CCNB1,891:up|hsa:23607,CD2AP,23607:up|hsa:5366,PMAIP1,5366:up|hsa:5911,RAP2A,5911:up|hsa:3479,IGF1,3479:down|hsa:1408,CRY2,1408:down|hsa:23471,TRAM1,23471:up|hsa:23409,SIRT4,23409:up|hsa:10026,PIGK,…	http://amigo.geneontology.org/cgi-bin/amigo/term_details?term=GO:0034613
negative regulation of cell division	Biological Process	GO:0051782	11	66	1438	17840	0.00764951321279555	0.00369955156950673	1.575617e-02	0.6731420	hsa:7175,TPR,7175:up|hsa:146691,TOM1L2,146691:down|hsa:546,ATRX,546:up|hsa:259266,ASPM,259266:up|hsa:1063,CENPF,1063:up|hsa:10628,TXNIP,10628:down|hsa:699,BUB1,699:up|hsa:652,BMP4,652:down|hsa:891,CCNB1,891:up|hsa:641,BLM,641:up|hsa:5008,OSM,5008:up	http://amigo.geneontology.org/cgi-bin/amigo/term_details?term=GO:0051782
positive regulation of nucleocytoplasmic transport	Biological Process	GO:0046824	17	120	1438	17840	0.0118219749652295	0.00672645739910314	1.586757e-02	0.6731420	hsa:26585,GREM1,26585:down|hsa:3728,JUP,3728:down|hsa:1950,EGF,1950:up|hsa:3843,IPO5,3843:up|hsa:5532,PPP3CB,5532:up|hsa:672,BRCA1,672:up|hsa:7175,TPR,7175:up|hsa:7097,TLR2,7097:up|hsa:10913,EDAR,10913:up|hsa:3479,IGF1,3479:down|hsa:6548,SLC9A1,6548:down|hsa:3717,JAK2,3717:up|hsa:22916,NCBP2,22916:up|hsa:3320,HSP90AA1,3320:up|hsa:652,BMP4,652:down|hsa:56892,C8orf4,56892:up|hsa:63928,CHP2,63928:do…	http://amigo.geneontology.org/cgi-bin/amigo/term_details?term=GO:0046824
regulation of establishment of protein localization	Biological Process	GO:0070201	84	828	1438	17840	0.0584144645340751	0.0464125560538117	1.639378e-02	0.6731420	hsa:23086,EXPH5,23086:down|hsa:26253,CLEC4E,26253:down|hsa:27242,TNFRSF21,27242:up|hsa:1950,EGF,1950:up|hsa:2266,FGG,2266:down|hsa:18,ABAT,18:up|hsa:9378,NRXN1,9378:down|hsa:637,BID,637:up|hsa:338322,NLRP10,338322:down|hsa:7474,WNT5A,7474:up|hsa:22948,CCT5,22948:up|hsa:8651,SOCS1,8651:up|hsa:5366,PMAIP1,5366:up|hsa:3479,IGF1,3479:down|hsa:7984,ARHGEF5,7984:down|hsa:55294,FBXW7,55294:down|hsa:8157…	http://amigo.geneontology.org/cgi-bin/amigo/term_details?term=GO:0070201
cartilage development	Biological Process	GO:0051216	23	178	1438	17840	0.0159944367176634	0.00997757847533632	1.644074e-02	0.6731420	hsa:26585,GREM1,26585:down|hsa:860,RUNX2,860:up|hsa:659,BMPR2,659:up|hsa:1302,COL11A2,1302:up|hsa:6662,SOX9,6662:up|hsa:9451,EIF2AK3,9451:up|hsa:91461,PKDCC,91461:down|hsa:359845,FAM101B,359845:up|hsa:2822,GPLD1,2822:down|hsa:7474,WNT5A,7474:up|hsa:85477,SCIN,85477:down|hsa:7482,WNT2B,7482:down|hsa:3696,ITGB8,3696:up|hsa:3091,HIF1A,3091:up|hsa:3202,HOXA5,3202:down|hsa:5307,PITX1,5307:up|hsa:4040,…	http://amigo.geneontology.org/cgi-bin/amigo/term_details?term=GO:0051216
response to cobalt ion	Biological Process	GO:0032025	4	13	1438	17840	0.00278164116828929	0.000728699551569507	1.664856e-02	0.6731420	hsa:466,ATF1,466:up|hsa:57103,TIGAR,57103:up|hsa:841,CASP8,841:up|hsa:3091,HIF1A,3091:up	http://amigo.geneontology.org/cgi-bin/amigo/term_details?term=GO:0032025
positive regulation of protein import into nucleus, translocation	Biological Process	GO:0033160	4	13	1438	17840	0.00278164116828929	0.000728699551569507	1.664856e-02	0.6731420	hsa:3717,JAK2,3717:up|hsa:672,BRCA1,672:up|hsa:3320,HSP90AA1,3320:up|hsa:3479,IGF1,3479:down	http://amigo.geneontology.org/cgi-bin/amigo/term_details?term=GO:0033160
negative regulation of keratinocyte proliferation	Biological Process	GO:0010839	4	13	1438	17840	0.00278164116828929	0.000728699551569507	1.664856e-02	0.6731420	hsa:7421,VDR,7421:up|hsa:8573,CASK,8573:up|hsa:57152,SLURP1,57152:down|hsa:1515,CTSV,1515:up	http://amigo.geneontology.org/cgi-bin/amigo/term_details?term=GO:0010839
left/right axis specification	Biological Process	GO:0070986	4	13	1438	17840	0.00278164116828929	0.000728699551569507	1.664856e-02	0.6731420	hsa:57669,EPB41L5,57669:up|hsa:26160,IFT172,26160:up|hsa:55329,MNS1,55329:up|hsa:200894,ARL13B,200894:up	http://amigo.geneontology.org/cgi-bin/amigo/term_details?term=GO:0070986
regulation of DNA-dependent DNA replication	Biological Process	GO:0090329	8	42	1438	17840	0.00556328233657858	0.0023542600896861	1.748914e-02	0.6731420	hsa:675,BRCA2,675:up|hsa:546,ATRX,546:up|hsa:54962,TIPIN,54962:up|hsa:1602,DACH1,1602:up|hsa:10735,STAG2,10735:up|hsa:55294,FBXW7,55294:down|hsa:652,BMP4,652:down|hsa:641,BLM,641:up	http://amigo.geneontology.org/cgi-bin/amigo/term_details?term=GO:0090329
cellular component biogenesis	Biological Process	GO:0044085	245	2689	1438	17840	0.170375521557719	0.15072869955157	1.750474e-02	0.6731420	hsa:6712,SPTBN2,6712:down|hsa:8936,WASF1,8936:up|hsa:10157,AASS,10157:up|hsa:1410,CRYAB,1410:down|hsa:546,ATRX,546:up|hsa:54869,EPS8L1,54869:down|hsa:7381,UQCRB,7381:up|hsa:57545,CC2D2A,57545:up|hsa:57505,AARS2,57505:up|hsa:1950,EGF,1950:up|hsa:25802,LMOD1,25802:down|hsa:140803,TRPM6,140803:up|hsa:50810,HDGFRP3,50810:up|hsa:1798,DPAGT1,1798:up|hsa:3646,EIF3E,3646:up|hsa:26160,IFT172,26160:up|hsa:…	http://amigo.geneontology.org/cgi-bin/amigo/term_details?term=GO:0044085
positive regulation of carbohydrate metabolic process	Biological Process	GO:0045913	12	76	1438	17840	0.00834492350486787	0.00426008968609865	1.801017e-02	0.6731420	hsa:5771,PTPN2,5771:up|hsa:9852,EPM2AIP1,9852:up|hsa:57103,TIGAR,57103:up|hsa:5366,PMAIP1,5366:up|hsa:3091,HIF1A,3091:up|hsa:4142,MAS1,4142:down|hsa:1950,EGF,1950:up|hsa:5734,PTGER4,5734:up|hsa:3479,IGF1,3479:down|hsa:10267,RAMP1,10267:up|hsa:10776,ARPP19,10776:up|hsa:2822,GPLD1,2822:down	http://amigo.geneontology.org/cgi-bin/amigo/term_details?term=GO:0045913
chondrocyte differentiation	Biological Process	GO:0002062	14	94	1438	17840	0.00973574408901252	0.00526905829596413	1.814254e-02	0.6731420	hsa:26585,GREM1,26585:down|hsa:860,RUNX2,860:up|hsa:659,BMPR2,659:up|hsa:6662,SOX9,6662:up|hsa:9451,EIF2AK3,9451:up|hsa:861,RUNX1,861:up|hsa:652,BMP4,652:down|hsa:91461,PKDCC,91461:down|hsa:4094,MAF,4094:down|hsa:359845,FAM101B,359845:up|hsa:55553,SOX6,55553:down|hsa:7482,WNT2B,7482:down|hsa:85477,SCIN,85477:down|hsa:2822,GPLD1,2822:down	http://amigo.geneontology.org/cgi-bin/amigo/term_details?term=GO:0002062
positive regulation of peptide hormone secretion	Biological Process	GO:0090277	13	85	1438	17840	0.0090403337969402	0.00476457399103139	1.819224e-02	0.6731420	hsa:222546,RFX6,222546:down|hsa:3091,HIF1A,3091:up|hsa:5734,PTGER4,5734:up|hsa:7447,VSNL1,7447:up|hsa:169026,SLC30A8,169026:down|hsa:3717,JAK2,3717:up|hsa:2266,FGG,2266:down|hsa:2244,FGB,2244:down|hsa:5532,PPP3CB,5532:up|hsa:116,ADCYAP1,116:up|hsa:18,ABAT,18:up|hsa:5213,PFKM,5213:up|hsa:2822,GPLD1,2822:down	http://amigo.geneontology.org/cgi-bin/amigo/term_details?term=GO:0090277
regulation of cardiac muscle contraction	Biological Process	GO:0055117	13	85	1438	17840	0.0090403337969402	0.00476457399103139	1.819224e-02	0.6731420	hsa:3728,JUP,3728:down|hsa:1824,DSC2,1824:up|hsa:3759,KCNJ2,3759:down|hsa:4878,NPPA,4878:up|hsa:1829,DSG2,1829:up|hsa:6548,SLC9A1,6548:down|hsa:51086,TNNI3K,51086:down|hsa:5144,PDE4D,5144:down|hsa:3320,HSP90AA1,3320:up|hsa:3757,KCNH2,3757:up|hsa:10021,HCN4,10021:up|hsa:6781,STC1,6781:up|hsa:1113,CHGA,1113:up	http://amigo.geneontology.org/cgi-bin/amigo/term_details?term=GO:0055117
cellular macromolecule localization	Biological Process	GO:0070727	148	1559	1438	17840	0.102920723226704	0.0873878923766816	1.830334e-02	0.6731420	hsa:23086,EXPH5,23086:down|hsa:11116,FGFR1OP,11116:up|hsa:10527,IPO7,10527:up|hsa:546,ATRX,546:up|hsa:1950,EGF,1950:up|hsa:10403,NDC80,10403:up|hsa:112609,MRAP2,112609:up|hsa:4869,NPM1,4869:up|hsa:891,CCNB1,891:up|hsa:23607,CD2AP,23607:up|hsa:5366,PMAIP1,5366:up|hsa:5911,RAP2A,5911:up|hsa:3479,IGF1,3479:down|hsa:1408,CRY2,1408:down|hsa:23471,TRAM1,23471:up|hsa:23409,SIRT4,23409:up|hsa:10026,PIGK,…	http://amigo.geneontology.org/cgi-bin/amigo/term_details?term=GO:0070727
mesodermal cell fate determination	Biological Process	GO:0007500	2	3	1438	17840	0.00139082058414465	0.000168161434977578	1.843380e-02	0.6731420	hsa:652,BMP4,652:down|hsa:9314,KLF4,9314:down	http://amigo.geneontology.org/cgi-bin/amigo/term_details?term=GO:0007500
apical constriction	Biological Process	GO:0003383	2	3	1438	17840	0.00139082058414465	0.000168161434977578	1.843380e-02	0.6731420	hsa:57669,EPB41L5,57669:up|hsa:6093,ROCK1,6093:up	http://amigo.geneontology.org/cgi-bin/amigo/term_details?term=GO:0003383
ureter morphogenesis	Biological Process	GO:0072197	2	3	1438	17840	0.00139082058414465	0.000168161434977578	1.843380e-02	0.6731420	hsa:652,BMP4,652:down|hsa:6662,SOX9,6662:up	http://amigo.geneontology.org/cgi-bin/amigo/term_details?term=GO:0072197
menaquinone metabolic process	Biological Process	GO:0009233	2	3	1438	17840	0.00139082058414465	0.000168161434977578	1.843380e-02	0.6731420	hsa:8529,CYP4F2,8529:up|hsa:57834,CYP4F11,57834:up	http://amigo.geneontology.org/cgi-bin/amigo/term_details?term=GO:0009233
NAD catabolic process	Biological Process	GO:0019677	2	3	1438	17840	0.00139082058414465	0.000168161434977578	1.843380e-02	0.6731420	hsa:57103,TIGAR,57103:up|hsa:83594,NUDT12,83594:up	http://amigo.geneontology.org/cgi-bin/amigo/term_details?term=GO:0019677
quinone catabolic process	Biological Process	GO:1901662	2	3	1438	17840	0.00139082058414465	0.000168161434977578	1.843380e-02	0.6731420	hsa:8529,CYP4F2,8529:up|hsa:57834,CYP4F11,57834:up	http://amigo.geneontology.org/cgi-bin/amigo/term_details?term=GO:1901662
toll-like receptor TLR1:TLR2 signaling pathway	Biological Process	GO:0038123	2	3	1438	17840	0.00139082058414465	0.000168161434977578	1.843380e-02	0.6731420	hsa:7097,TLR2,7097:up|hsa:7096,TLR1,7096:up	http://amigo.geneontology.org/cgi-bin/amigo/term_details?term=GO:0038123
phylloquinone metabolic process	Biological Process	GO:0042374	2	3	1438	17840	0.00139082058414465	0.000168161434977578	1.843380e-02	0.6731420	hsa:8529,CYP4F2,8529:up|hsa:57834,CYP4F11,57834:up	http://amigo.geneontology.org/cgi-bin/amigo/term_details?term=GO:0042374
ureter urothelium development	Biological Process	GO:0072190	2	3	1438	17840	0.00139082058414465	0.000168161434977578	1.843380e-02	0.6731420	hsa:652,BMP4,652:down|hsa:6662,SOX9,6662:up	http://amigo.geneontology.org/cgi-bin/amigo/term_details?term=GO:0072190
rhombomere 3 development	Biological Process	GO:0021569	2	3	1438	17840	0.00139082058414465	0.000168161434977578	1.843380e-02	0.6731420	hsa:3212,HOXB2,3212:down|hsa:1959,EGR2,1959:up	http://amigo.geneontology.org/cgi-bin/amigo/term_details?term=GO:0021569
positive regulation of PERK-mediated unfolded protein response	Biological Process	GO:1903899	2	3	1438	17840	0.00139082058414465	0.000168161434977578	1.843380e-02	0.6731420	hsa:5771,PTPN2,5771:up|hsa:55161,TMEM33,55161:up	http://amigo.geneontology.org/cgi-bin/amigo/term_details?term=GO:1903899
phylloquinone catabolic process	Biological Process	GO:0042376	2	3	1438	17840	0.00139082058414465	0.000168161434977578	1.843380e-02	0.6731420	hsa:8529,CYP4F2,8529:up|hsa:57834,CYP4F11,57834:up	http://amigo.geneontology.org/cgi-bin/amigo/term_details?term=GO:0042376
positive regulation of lipoprotein particle clearance	Biological Process	GO:0010986	2	3	1438	17840	0.00139082058414465	0.000168161434977578	1.843380e-02	0.6731420	hsa:9388,LIPG,9388:up|hsa:2822,GPLD1,2822:down	http://amigo.geneontology.org/cgi-bin/amigo/term_details?term=GO:0010986
response to triacyl bacterial lipopeptide	Biological Process	GO:0071725	2	3	1438	17840	0.00139082058414465	0.000168161434977578	1.843380e-02	0.6731420	hsa:7097,TLR2,7097:up|hsa:7096,TLR1,7096:up	http://amigo.geneontology.org/cgi-bin/amigo/term_details?term=GO:0071725
regulation of potassium ion export	Biological Process	GO:1902302	2	3	1438	17840	0.00139082058414465	0.000168161434977578	1.843380e-02	0.6731420	hsa:3757,KCNH2,3757:up|hsa:4878,NPPA,4878:up	http://amigo.geneontology.org/cgi-bin/amigo/term_details?term=GO:1902302
potassium ion export across plasma membrane	Biological Process	GO:0097623	2	3	1438	17840	0.00139082058414465	0.000168161434977578	1.843380e-02	0.6731420	hsa:3757,KCNH2,3757:up|hsa:4878,NPPA,4878:up	http://amigo.geneontology.org/cgi-bin/amigo/term_details?term=GO:0097623
post-translational protein acetylation	Biological Process	GO:0034421	2	3	1438	17840	0.00139082058414465	0.000168161434977578	1.843380e-02	0.6731420	hsa:157570,ESCO2,157570:up|hsa:114799,ESCO1,114799:up	http://amigo.geneontology.org/cgi-bin/amigo/term_details?term=GO:0034421
detection of bacterial lipopeptide	Biological Process	GO:0070340	2	3	1438	17840	0.00139082058414465	0.000168161434977578	1.843380e-02	0.6731420	hsa:7097,TLR2,7097:up|hsa:7096,TLR1,7096:up	http://amigo.geneontology.org/cgi-bin/amigo/term_details?term=GO:0070340
regulation of macromitophagy	Biological Process	GO:1901524	2	3	1438	17840	0.00139082058414465	0.000168161434977578	1.843380e-02	0.6731420	hsa:154,ADRB2,154:down|hsa:57103,TIGAR,57103:up	http://amigo.geneontology.org/cgi-bin/amigo/term_details?term=GO:1901524
cellular response to triacyl bacterial lipopeptide	Biological Process	GO:0071727	2	3	1438	17840	0.00139082058414465	0.000168161434977578	1.843380e-02	0.6731420	hsa:7097,TLR2,7097:up|hsa:7096,TLR1,7096:up	http://amigo.geneontology.org/cgi-bin/amigo/term_details?term=GO:0071727
regulation of high-density lipoprotein particle clearance	Biological Process	GO:0010982	2	3	1438	17840	0.00139082058414465	0.000168161434977578	1.843380e-02	0.6731420	hsa:9388,LIPG,9388:up|hsa:2822,GPLD1,2822:down	http://amigo.geneontology.org/cgi-bin/amigo/term_details?term=GO:0010982
response to human chorionic gonadotropin	Biological Process	GO:0044752	2	3	1438	17840	0.00139082058414465	0.000168161434977578	1.843380e-02	0.6731420	hsa:4925,NUCB2,4925:up|hsa:2706,GJB2,2706:up	http://amigo.geneontology.org/cgi-bin/amigo/term_details?term=GO:0044752
chemorepulsion of axon	Biological Process	GO:0061643	2	3	1438	17840	0.00139082058414465	0.000168161434977578	1.843380e-02	0.6731420	hsa:91584,PLXNA4,91584:down|hsa:7474,WNT5A,7474:up	http://amigo.geneontology.org/cgi-bin/amigo/term_details?term=GO:0061643
protein localization to chromosome, telomeric region	Biological Process	GO:0070198	6	27	1438	17840	0.00417246175243394	0.00151345291479821	1.844905e-02	0.6731420	hsa:22948,CCT5,22948:up|hsa:10576,CCT2,10576:up|hsa:545,ATR,545:up|hsa:6950,TCP1,6950:up|hsa:675,BRCA2,675:up|hsa:546,ATRX,546:up	http://amigo.geneontology.org/cgi-bin/amigo/term_details?term=GO:0070198
protein complex assembly	Biological Process	GO:0006461	135	1410	1438	17840	0.0938803894297636	0.0790358744394619	1.847297e-02	0.6731420	hsa:6712,SPTBN2,6712:down|hsa:8936,WASF1,8936:up|hsa:10157,AASS,10157:up|hsa:1410,CRYAB,1410:down|hsa:546,ATRX,546:up|hsa:7381,UQCRB,7381:up|hsa:57505,AARS2,57505:up|hsa:1950,EGF,1950:up|hsa:25802,LMOD1,25802:down|hsa:140803,TRPM6,140803:up|hsa:50810,HDGFRP3,50810:up|hsa:1798,DPAGT1,1798:up|hsa:4869,NPM1,4869:up|hsa:2266,FGG,2266:down|hsa:891,CCNB1,891:up|hsa:440689,HIST2H2BF,440689:up|hsa:23607,…	http://amigo.geneontology.org/cgi-bin/amigo/term_details?term=GO:0006461
negative regulation of protein depolymerization	Biological Process	GO:1901880	10	59	1438	17840	0.00695410292072323	0.00330717488789238	1.862236e-02	0.6731420	hsa:5756,TWF1,5756:up|hsa:29765,TMOD4,29765:up|hsa:6712,SPTBN2,6712:down|hsa:57159,TRIM54,57159:up|hsa:10677,AVIL,10677:up|hsa:25802,LMOD1,25802:down|hsa:50810,HDGFRP3,50810:up|hsa:830,CAPZA2,830:up|hsa:4281,MID1,4281:down|hsa:85477,SCIN,85477:down	http://amigo.geneontology.org/cgi-bin/amigo/term_details?term=GO:1901880
negative regulation of biomineral tissue development	Biological Process	GO:0070168	5	20	1438	17840	0.00347705146036161	0.00112107623318386	1.883618e-02	0.6731420	hsa:26585,GREM1,26585:down|hsa:54829,ASPN,54829:up|hsa:3091,HIF1A,3091:up|hsa:359845,FAM101B,359845:up|hsa:6662,SOX9,6662:up	http://amigo.geneontology.org/cgi-bin/amigo/term_details?term=GO:0070168
protein complex biogenesis	Biological Process	GO:0070271	135	1411	1438	17840	0.0938803894297636	0.0790919282511211	1.886014e-02	0.6731420	hsa:6712,SPTBN2,6712:down|hsa:8936,WASF1,8936:up|hsa:10157,AASS,10157:up|hsa:1410,CRYAB,1410:down|hsa:546,ATRX,546:up|hsa:7381,UQCRB,7381:up|hsa:57505,AARS2,57505:up|hsa:1950,EGF,1950:up|hsa:25802,LMOD1,25802:down|hsa:140803,TRPM6,140803:up|hsa:50810,HDGFRP3,50810:up|hsa:1798,DPAGT1,1798:up|hsa:4869,NPM1,4869:up|hsa:2266,FGG,2266:down|hsa:891,CCNB1,891:up|hsa:440689,HIST2H2BF,440689:up|hsa:23607,…	http://amigo.geneontology.org/cgi-bin/amigo/term_details?term=GO:0070271
neural tube development	Biological Process	GO:0021915	20	151	1438	17840	0.0139082058414465	0.00846412556053812	1.890733e-02	0.6731420	hsa:57167,SALL4,57167:down|hsa:57545,CC2D2A,57545:up|hsa:7976,FZD3,7976:up|hsa:26160,IFT172,26160:up|hsa:9585,KIF20B,9585:up|hsa:25902,MTHFD1L,25902:up|hsa:2535,FZD2,2535:up|hsa:57216,VANGL2,57216:up|hsa:6491,STIL,6491:up|hsa:7474,WNT5A,7474:up|hsa:2019,EN1,2019:down|hsa:6788,STK3,6788:up|hsa:9355,LHX2,9355:up|hsa:3091,HIF1A,3091:up|hsa:8543,LMO4,8543:up|hsa:200894,ARL13B,200894:up|hsa:4040,LRP6,…	http://amigo.geneontology.org/cgi-bin/amigo/term_details?term=GO:0021915
meiotic nuclear division	Biological Process	GO:0007126	21	161	1438	17840	0.0146036161335188	0.00902466367713005	1.926267e-02	0.6731420	hsa:84501,SPIRE2,84501:up|hsa:259266,ASPM,259266:up|hsa:7155,TOP2B,7155:up|hsa:54456,MOV10L1,54456:up|hsa:10592,SMC2,10592:up|hsa:84690,SPATA22,84690:down|hsa:2175,FANCA,2175:up|hsa:7474,WNT5A,7474:up|hsa:136991,ASZ1,136991:down|hsa:811,CALR,811:up|hsa:7153,TOP2A,7153:up|hsa:675,BRCA2,675:up|hsa:151246,SGO2,151246:up|hsa:676,BRDT,676:down|hsa:10111,RAD50,10111:up|hsa:642636,RAD21L1,642636:down|hs…	http://amigo.geneontology.org/cgi-bin/amigo/term_details?term=GO:0007126
DNA replication-independent nucleosome assembly	Biological Process	GO:0006336	9	51	1438	17840	0.0062586926286509	0.00285874439461883	1.951456e-02	0.6731420	hsa:546,ATRX,546:up|hsa:54069,MIS18A,54069:up|hsa:4869,NPM1,4869:up|hsa:64105,CENPK,64105:up|hsa:51773,RSF1,51773:up|hsa:5928,RBBP4,5928:up|hsa:8467,SMARCA5,8467:up|hsa:378708,APITD1,378708:up|hsa:55320,MIS18BP1,55320:up	http://amigo.geneontology.org/cgi-bin/amigo/term_details?term=GO:0006336
DNA replication-independent nucleosome organization	Biological Process	GO:0034724	9	51	1438	17840	0.0062586926286509	0.00285874439461883	1.951456e-02	0.6731420	hsa:546,ATRX,546:up|hsa:54069,MIS18A,54069:up|hsa:4869,NPM1,4869:up|hsa:64105,CENPK,64105:up|hsa:51773,RSF1,51773:up|hsa:5928,RBBP4,5928:up|hsa:8467,SMARCA5,8467:up|hsa:378708,APITD1,378708:up|hsa:55320,MIS18BP1,55320:up	http://amigo.geneontology.org/cgi-bin/amigo/term_details?term=GO:0034724
development of primary sexual characteristics	Biological Process	GO:0045137	27	221	1438	17840	0.0187760778859527	0.0123878923766816	1.974240e-02	0.6731420	hsa:546,ATRX,546:up|hsa:4142,MAS1,4142:down|hsa:259266,ASPM,259266:up|hsa:638,BIK,638:up|hsa:1602,DACH1,1602:up|hsa:6662,SOX9,6662:up|hsa:5734,PTGER4,5734:up|hsa:51742,ARID4B,51742:up|hsa:116,ADCYAP1,116:up|hsa:2175,FANCA,2175:up|hsa:2296,FOXC1,2296:up|hsa:7474,WNT5A,7474:up|hsa:7482,WNT2B,7482:down|hsa:3206,HOXA10,3206:down|hsa:675,BRCA2,675:up|hsa:56956,LHX9,56956:up|hsa:283,ANG,283:down|hsa:32…	http://amigo.geneontology.org/cgi-bin/amigo/term_details?term=GO:0045137
actin-mediated cell contraction	Biological Process	GO:0070252	14	95	1438	17840	0.00973574408901252	0.00532511210762332	1.975328e-02	0.6731420	hsa:4622,MYH4,4622:down|hsa:57669,EPB41L5,57669:up|hsa:3728,JUP,3728:down|hsa:1824,DSC2,1824:up|hsa:70,ACTC1,70:down|hsa:3759,KCNJ2,3759:down|hsa:1829,DSG2,1829:up|hsa:6548,SLC9A1,6548:down|hsa:7135,TNNI1,7135:up|hsa:5144,PDE4D,5144:down|hsa:6093,ROCK1,6093:up|hsa:3757,KCNH2,3757:up|hsa:7168,TPM1,7168:up|hsa:6781,STC1,6781:up	http://amigo.geneontology.org/cgi-bin/amigo/term_details?term=GO:0070252
microtubule cytoskeleton organization	Biological Process	GO:0000226	46	419	1438	17840	0.0319888734353268	0.0234865470852018	1.987517e-02	0.6731420	hsa:22995,CEP152,22995:up|hsa:10142,AKAP9,10142:up|hsa:11116,FGFR1OP,11116:up|hsa:4659,PPP1R12A,4659:up|hsa:1410,CRYAB,1410:down|hsa:57545,CC2D2A,57545:up|hsa:10403,NDC80,10403:up|hsa:50810,HDGFRP3,50810:up|hsa:4869,NPM1,4869:up|hsa:26160,IFT172,26160:up|hsa:891,CCNB1,891:up|hsa:161582,DYX1C1,161582:up|hsa:3925,STMN1,3925:up|hsa:6491,STIL,6491:up|hsa:51673,TPPP3,51673:down|hsa:401720,FIGNL2,40172…	http://amigo.geneontology.org/cgi-bin/amigo/term_details?term=GO:0000226
regulation of ATPase activity	Biological Process	GO:0043462	10	60	1438	17840	0.00695410292072323	0.00336322869955157	2.078494e-02	0.6731420	hsa:1266,CNN3,1266:up|hsa:54431,DNAJC10,54431:up|hsa:5359,PLSCR1,5359:up|hsa:64215,DNAJC1,64215:up|hsa:130872,AHSA2,130872:up|hsa:154,ADRB2,154:down|hsa:7168,TPM1,7168:up|hsa:229,ALDOB,229:down|hsa:3306,HSPA2,3306:down|hsa:29128,UHRF1,29128:up	http://amigo.geneontology.org/cgi-bin/amigo/term_details?term=GO:0043462
centrosome duplication	Biological Process	GO:0051298	10	60	1438	17840	0.00695410292072323	0.00336322869955157	2.078494e-02	0.6731420	hsa:22995,CEP152,22995:up|hsa:7514,XPO1,7514:up|hsa:675,BRCA2,675:up|hsa:9738,CCP110,9738:up|hsa:4869,NPM1,4869:up|hsa:672,BRCA1,672:up|hsa:899,CCNF,899:up|hsa:6491,STIL,6491:up|hsa:163786,SASS6,163786:up|hsa:9475,ROCK2,9475:up	http://amigo.geneontology.org/cgi-bin/amigo/term_details?term=GO:0051298
cellular response to sterol depletion	Biological Process	GO:0071501	3	8	1438	17840	0.00208623087621697	0.000448430493273543	2.150317e-02	0.6731420	hsa:55294,FBXW7,55294:down|hsa:51141,INSIG2,51141:up|hsa:11160,ERLIN2,11160:up	http://amigo.geneontology.org/cgi-bin/amigo/term_details?term=GO:0071501
very-low-density lipoprotein particle assembly	Biological Process	GO:0034379	3	8	1438	17840	0.00208623087621697	0.000448430493273543	2.150317e-02	0.6731420	hsa:8435,SOAT2,8435:up|hsa:338,APOB,338:down|hsa:2181,ACSL3,2181:up	http://amigo.geneontology.org/cgi-bin/amigo/term_details?term=GO:0034379
trachea cartilage development	Biological Process	GO:0060534	3	8	1438	17840	0.00208623087621697	0.000448430493273543	2.150317e-02	0.6731420	hsa:4040,LRP6,4040:up|hsa:3202,HOXA5,3202:down|hsa:6662,SOX9,6662:up	http://amigo.geneontology.org/cgi-bin/amigo/term_details?term=GO:0060534
mesenchymal-epithelial cell signaling	Biological Process	GO:0060638	3	8	1438	17840	0.00208623087621697	0.000448430493273543	2.150317e-02	0.6731420	hsa:3202,HOXA5,3202:down|hsa:7474,WNT5A,7474:up|hsa:7482,WNT2B,7482:down	http://amigo.geneontology.org/cgi-bin/amigo/term_details?term=GO:0060638
positive regulation of blood pressure by epinephrine-norepinephrine	Biological Process	GO:0003321	3	8	1438	17840	0.00208623087621697	0.000448430493273543	2.150317e-02	0.6731420	hsa:154,ADRB2,154:down|hsa:5144,PDE4D,5144:down|hsa:7168,TPM1,7168:up	http://amigo.geneontology.org/cgi-bin/amigo/term_details?term=GO:0003321
SREBP signaling pathway	Biological Process	GO:0032933	3	8	1438	17840	0.00208623087621697	0.000448430493273543	2.150317e-02	0.6731420	hsa:55294,FBXW7,55294:down|hsa:51141,INSIG2,51141:up|hsa:11160,ERLIN2,11160:up	http://amigo.geneontology.org/cgi-bin/amigo/term_details?term=GO:0032933
negative regulation of triglyceride metabolic process	Biological Process	GO:0090209	3	8	1438	17840	0.00208623087621697	0.000448430493273543	2.150317e-02	0.6731420	hsa:892,CCNC,892:up|hsa:55294,FBXW7,55294:down|hsa:2822,GPLD1,2822:down	http://amigo.geneontology.org/cgi-bin/amigo/term_details?term=GO:0090209
vitamin transmembrane transport	Biological Process	GO:0035461	3	8	1438	17840	0.00208623087621697	0.000448430493273543	2.150317e-02	0.6731420	hsa:8884,SLC5A6,8884:up|hsa:9962,SLC23A2,9962:up|hsa:4363,ABCC1,4363:up	http://amigo.geneontology.org/cgi-bin/amigo/term_details?term=GO:0035461
positive regulation of cell size	Biological Process	GO:0045793	4	14	1438	17840	0.00278164116828929	0.0007847533632287	2.184914e-02	0.6731420	hsa:3320,HSP90AA1,3320:up|hsa:9821,RB1CC1,9821:up|hsa:3091,HIF1A,3091:up|hsa:154796,AMOT,154796:down	http://amigo.geneontology.org/cgi-bin/amigo/term_details?term=GO:0045793
negative regulation of fatty acid biosynthetic process	Biological Process	GO:0045717	4	14	1438	17840	0.00278164116828929	0.0007847533632287	2.184914e-02	0.6731420	hsa:33,ACADL,33:down|hsa:51141,INSIG2,51141:up|hsa:672,BRCA1,672:up|hsa:11160,ERLIN2,11160:up	http://amigo.geneontology.org/cgi-bin/amigo/term_details?term=GO:0045717
coenzyme catabolic process	Biological Process	GO:0009109	4	14	1438	17840	0.00278164116828929	0.0007847533632287	2.184914e-02	0.6731420	hsa:57103,TIGAR,57103:up|hsa:8529,CYP4F2,8529:up|hsa:57834,CYP4F11,57834:up|hsa:83594,NUDT12,83594:up	http://amigo.geneontology.org/cgi-bin/amigo/term_details?term=GO:0009109
protein localization to microtubule cytoskeleton	Biological Process	GO:0072698	6	28	1438	17840	0.00417246175243394	0.0015695067264574	2.192293e-02	0.6731420	hsa:11043,MID2,11043:down|hsa:9585,KIF20B,9585:up|hsa:27185,DISC1,27185:down|hsa:64770,CCDC14,64770:up|hsa:6491,STIL,6491:up|hsa:4281,MID1,4281:down	http://amigo.geneontology.org/cgi-bin/amigo/term_details?term=GO:0072698
histone exchange	Biological Process	GO:0043486	9	52	1438	17840	0.0062586926286509	0.00291479820627803	2.196545e-02	0.6731420	hsa:54069,MIS18A,54069:up|hsa:23198,PSME4,23198:up|hsa:4869,NPM1,4869:up|hsa:64105,CENPK,64105:up|hsa:51773,RSF1,51773:up|hsa:5928,RBBP4,5928:up|hsa:8467,SMARCA5,8467:up|hsa:378708,APITD1,378708:up|hsa:55320,MIS18BP1,55320:up	http://amigo.geneontology.org/cgi-bin/amigo/term_details?term=GO:0043486
regulation of release of cytochrome c from mitochondria	Biological Process	GO:0090199	8	44	1438	17840	0.00556328233657858	0.00246636771300448	2.278775e-02	0.6731420	hsa:5366,PMAIP1,5366:up|hsa:10962,MLLT11,10962:up|hsa:638,BIK,638:up|hsa:3479,IGF1,3479:down|hsa:8743,TNFSF10,8743:up|hsa:10018,BCL2L11,10018:up|hsa:637,BID,637:up|hsa:9141,PDCD5,9141:up	http://amigo.geneontology.org/cgi-bin/amigo/term_details?term=GO:0090199
actin filament capping	Biological Process	GO:0051693	7	36	1438	17840	0.00486787204450626	0.00201793721973094	2.294615e-02	0.6731420	hsa:5756,TWF1,5756:up|hsa:29765,TMOD4,29765:up|hsa:6712,SPTBN2,6712:down|hsa:10677,AVIL,10677:up|hsa:830,CAPZA2,830:up|hsa:25802,LMOD1,25802:down|hsa:85477,SCIN,85477:down	http://amigo.geneontology.org/cgi-bin/amigo/term_details?term=GO:0051693
replication fork processing	Biological Process	GO:0031297	5	21	1438	17840	0.00347705146036161	0.00117713004484305	2.312223e-02	0.6731420	hsa:259282,BOD1L1,259282:up|hsa:675,BRCA2,675:up|hsa:641,BLM,641:up|hsa:378708,APITD1,378708:up|hsa:546,ATRX,546:up	http://amigo.geneontology.org/cgi-bin/amigo/term_details?term=GO:0031297
decidualization	Biological Process	GO:0046697	5	21	1438	17840	0.00347705146036161	0.00117713004484305	2.312223e-02	0.6731420	hsa:7421,VDR,7421:up|hsa:1508,CTSB,1508:up|hsa:2706,GJB2,2706:up|hsa:6781,STC1,6781:up|hsa:1515,CTSV,1515:up	http://amigo.geneontology.org/cgi-bin/amigo/term_details?term=GO:0046697
positive regulation of excitatory postsynaptic membrane potential	Biological Process	GO:2000463	5	21	1438	17840	0.00347705146036161	0.00117713004484305	2.312223e-02	0.6731420	hsa:112755,STX1B,112755:up|hsa:9378,NRXN1,9378:down|hsa:6804,STX1A,6804:up|hsa:23316,CUX2,23316:up|hsa:9699,RIMS2,9699:up	http://amigo.geneontology.org/cgi-bin/amigo/term_details?term=GO:2000463
cell-cell junction assembly	Biological Process	GO:0007043	13	88	1438	17840	0.0090403337969402	0.00493273542600897	2.368429e-02	0.6731420	hsa:5586,PKN2,5586:up|hsa:7122,CLDN5,7122:down|hsa:3728,JUP,3728:down|hsa:7094,TLN1,7094:up|hsa:143098,MPP7,143098:down|hsa:6624,FSCN1,6624:up|hsa:2706,GJB2,2706:up|hsa:5584,PRKCI,5584:up|hsa:6093,ROCK1,6093:up|hsa:154796,AMOT,154796:down|hsa:9475,ROCK2,9475:up|hsa:91862,MARVELD3,91862:up|hsa:100506658,OCLN,100506658:down	http://amigo.geneontology.org/cgi-bin/amigo/term_details?term=GO:0007043
chromosome segregation	Biological Process	GO:0007059	35	308	1438	17840	0.0243393602225313	0.0172645739910314	2.461098e-02	0.6731420	hsa:152110,NEK10,152110:up|hsa:114799,ESCO1,114799:up|hsa:546,ATRX,546:up|hsa:1063,CENPF,1063:up|hsa:54069,MIS18A,54069:up|hsa:10403,NDC80,10403:up|hsa:157570,ESCO2,157570:up|hsa:79677,SMC6,79677:up|hsa:7155,TOP2B,7155:up|hsa:891,CCNB1,891:up|hsa:55055,ZWILCH,55055:up|hsa:84690,SPATA22,84690:down|hsa:7153,TOP2A,7153:up|hsa:151246,SGO2,151246:up|hsa:4751,NEK2,4751:down|hsa:55294,FBXW7,55294:down|h…	http://amigo.geneontology.org/cgi-bin/amigo/term_details?term=GO:0007059
macromolecular complex subunit organization	Biological Process	GO:0043933	230	2535	1438	17840	0.159944367176634	0.142096412556054	2.496475e-02	0.6731420	hsa:6712,SPTBN2,6712:down|hsa:8936,WASF1,8936:up|hsa:10157,AASS,10157:up|hsa:1410,CRYAB,1410:down|hsa:546,ATRX,546:up|hsa:7381,UQCRB,7381:up|hsa:57505,AARS2,57505:up|hsa:1950,EGF,1950:up|hsa:25802,LMOD1,25802:down|hsa:10403,NDC80,10403:up|hsa:140803,TRPM6,140803:up|hsa:50810,HDGFRP3,50810:up|hsa:1798,DPAGT1,1798:up|hsa:3646,EIF3E,3646:up|hsa:26160,IFT172,26160:up|hsa:4869,NPM1,4869:up|hsa:9388,LI…	http://amigo.geneontology.org/cgi-bin/amigo/term_details?term=GO:0043933
actomyosin structure organization	Biological Process	GO:0031032	19	146	1438	17840	0.0132127955493741	0.00818385650224215	2.563432e-02	0.6731420	hsa:57669,EPB41L5,57669:up|hsa:1266,CNN3,1266:up|hsa:70,ACTC1,70:down|hsa:25802,LMOD1,25802:down|hsa:5734,PTGER4,5734:up|hsa:58529,MYOZ1,58529:up|hsa:90167,FRMD7,90167:down|hsa:4629,MYH11,4629:down|hsa:29765,TMOD4,29765:up|hsa:10529,NEBL,10529:down|hsa:23363,OBSL1,23363:up|hsa:7984,ARHGEF5,7984:down|hsa:6548,SLC9A1,6548:down|hsa:1265,CNN2,1265:up|hsa:6093,ROCK1,6093:up|hsa:7168,TPM1,7168:up|hsa:1…	http://amigo.geneontology.org/cgi-bin/amigo/term_details?term=GO:0031032
negative regulation of protein complex disassembly	Biological Process	GO:0043242	10	62	1438	17840	0.00695410292072323	0.00347533632286996	2.564919e-02	0.6731420	hsa:5756,TWF1,5756:up|hsa:29765,TMOD4,29765:up|hsa:6712,SPTBN2,6712:down|hsa:57159,TRIM54,57159:up|hsa:10677,AVIL,10677:up|hsa:25802,LMOD1,25802:down|hsa:50810,HDGFRP3,50810:up|hsa:830,CAPZA2,830:up|hsa:4281,MID1,4281:down|hsa:85477,SCIN,85477:down	http://amigo.geneontology.org/cgi-bin/amigo/term_details?term=GO:0043242
positive regulation of peptide secretion	Biological Process	GO:0002793	13	89	1438	17840	0.0090403337969402	0.00498878923766816	2.576258e-02	0.6731420	hsa:222546,RFX6,222546:down|hsa:3091,HIF1A,3091:up|hsa:5734,PTGER4,5734:up|hsa:7447,VSNL1,7447:up|hsa:169026,SLC30A8,169026:down|hsa:3717,JAK2,3717:up|hsa:2266,FGG,2266:down|hsa:2244,FGB,2244:down|hsa:5532,PPP3CB,5532:up|hsa:116,ADCYAP1,116:up|hsa:18,ABAT,18:up|hsa:5213,PFKM,5213:up|hsa:2822,GPLD1,2822:down	http://amigo.geneontology.org/cgi-bin/amigo/term_details?term=GO:0002793
negative regulation of vasculature development	Biological Process	GO:1901343	12	80	1438	17840	0.00834492350486787	0.00448430493273543	2.607215e-02	0.6731420	hsa:79812,MMRN2,79812:down|hsa:7060,THBS4,7060:up|hsa:9314,KLF4,9314:down|hsa:3202,HOXA5,3202:down|hsa:5734,PTGER4,5734:up|hsa:5054,SERPINE1,5054:up|hsa:154,ADRB2,154:down|hsa:6093,ROCK1,6093:up|hsa:652,BMP4,652:down|hsa:154796,AMOT,154796:down|hsa:9475,ROCK2,9475:up|hsa:2296,FOXC1,2296:up	http://amigo.geneontology.org/cgi-bin/amigo/term_details?term=GO:1901343
regulation of microtubule cytoskeleton organization	Biological Process	GO:0070507	17	127	1438	17840	0.0118219749652295	0.00711883408071749	2.631698e-02	0.6731420	hsa:90417,KNSTRN,90417:up|hsa:57662,CAMSAP3,57662:down|hsa:50810,HDGFRP3,50810:up|hsa:4869,NPM1,4869:up|hsa:672,BRCA1,672:up|hsa:891,CCNB1,891:up|hsa:899,CCNF,899:up|hsa:27124,INPP5J,27124:down|hsa:3925,STMN1,3925:up|hsa:7175,TPR,7175:up|hsa:57159,TRIM54,57159:up|hsa:7514,XPO1,7514:up|hsa:4751,NEK2,4751:down|hsa:26054,SENP6,26054:up|hsa:9475,ROCK2,9475:up|hsa:4281,MID1,4281:down|hsa:4137,MAPT,413…	http://amigo.geneontology.org/cgi-bin/amigo/term_details?term=GO:0070507
cardiocyte differentiation	Biological Process	GO:0035051	15	108	1438	17840	0.0104311543810848	0.00605381165919283	2.646725e-02	0.6731420	hsa:811,CALR,811:up|hsa:9150,CTDP1,9150:down|hsa:26585,GREM1,26585:down|hsa:90,ACVR1,90:up|hsa:23363,OBSL1,23363:up|hsa:70,ACTC1,70:down|hsa:10529,NEBL,10529:down|hsa:4878,NPPA,4878:up|hsa:6548,SLC9A1,6548:down|hsa:652,BMP4,652:down|hsa:891,CCNB1,891:up|hsa:9474,ATG5,9474:up|hsa:91624,NEXN,91624:up|hsa:55553,SOX6,55553:down|hsa:4629,MYH11,4629:down	http://amigo.geneontology.org/cgi-bin/amigo/term_details?term=GO:0035051
positive regulation of DNA metabolic process	Biological Process	GO:0051054	23	187	1438	17840	0.0159944367176634	0.0104820627802691	2.769523e-02	0.6731420	hsa:10576,CCT2,10576:up|hsa:26585,GREM1,26585:down|hsa:546,ATRX,546:up|hsa:4142,MAS1,4142:down|hsa:7468,WHSC1,7468:up|hsa:672,BRCA1,672:up|hsa:811,CALR,811:up|hsa:7153,TOP2A,7153:up|hsa:22948,CCT5,22948:up|hsa:466,ATF1,466:up|hsa:7175,TPR,7175:up|hsa:6950,TCP1,6950:up|hsa:57103,TIGAR,57103:up|hsa:9314,KLF4,9314:down|hsa:10111,RAD50,10111:up|hsa:3479,IGF1,3479:down|hsa:4751,NEK2,4751:down|hsa:2069…	http://amigo.geneontology.org/cgi-bin/amigo/term_details?term=GO:0051054
meiotic cell cycle process	Biological Process	GO:1903046	21	167	1438	17840	0.0146036161335188	0.0093609865470852	2.770554e-02	0.6731420	hsa:84501,SPIRE2,84501:up|hsa:259266,ASPM,259266:up|hsa:7155,TOP2B,7155:up|hsa:54456,MOV10L1,54456:up|hsa:10592,SMC2,10592:up|hsa:84690,SPATA22,84690:down|hsa:2175,FANCA,2175:up|hsa:7474,WNT5A,7474:up|hsa:136991,ASZ1,136991:down|hsa:811,CALR,811:up|hsa:7153,TOP2A,7153:up|hsa:675,BRCA2,675:up|hsa:151246,SGO2,151246:up|hsa:676,BRDT,676:down|hsa:10111,RAD50,10111:up|hsa:642636,RAD21L1,642636:down|hs…	http://amigo.geneontology.org/cgi-bin/amigo/term_details?term=GO:1903046
fructose metabolic process	Biological Process	GO:0006000	4	15	1438	17840	0.00278164116828929	0.000840807174887892	2.793561e-02	0.6731420	hsa:5210,PFKFB4,5210:up|hsa:229,ALDOB,229:down|hsa:230,ALDOC,230:down|hsa:3795,KHK,3795:up	http://amigo.geneontology.org/cgi-bin/amigo/term_details?term=GO:0006000
DNA damage response, signal transduction by p53 class mediator resulting in transcription of p21 class mediator	Biological Process	GO:0006978	4	15	1438	17840	0.00278164116828929	0.000840807174887892	2.793561e-02	0.6731420	hsa:672,BRCA1,672:up|hsa:675,BRCA2,675:up|hsa:28996,HIPK2,28996:up|hsa:55544,RBM38,55544:up	http://amigo.geneontology.org/cgi-bin/amigo/term_details?term=GO:0006978
establishment of protein localization to telomere	Biological Process	GO:0070200	4	15	1438	17840	0.00278164116828929	0.000840807174887892	2.793561e-02	0.6731420	hsa:22948,CCT5,22948:up|hsa:10576,CCT2,10576:up|hsa:6950,TCP1,6950:up|hsa:675,BRCA2,675:up	http://amigo.geneontology.org/cgi-bin/amigo/term_details?term=GO:0070200
cellular response to sterol	Biological Process	GO:0036315	4	15	1438	17840	0.00278164116828929	0.000840807174887892	2.793561e-02	0.6731420	hsa:4040,LRP6,4040:up|hsa:114881,OSBPL7,114881:up|hsa:6095,RORA,6095:down|hsa:2822,GPLD1,2822:down	http://amigo.geneontology.org/cgi-bin/amigo/term_details?term=GO:0036315
positive regulation of striated muscle contraction	Biological Process	GO:0045989	4	15	1438	17840	0.00278164116828929	0.000840807174887892	2.793561e-02	0.6731420	hsa:3320,HSP90AA1,3320:up|hsa:487,ATP2A1,487:up|hsa:4878,NPPA,4878:up|hsa:1113,CHGA,1113:up	http://amigo.geneontology.org/cgi-bin/amigo/term_details?term=GO:0045989
positive regulation of protein oligomerization	Biological Process	GO:0032461	5	22	1438	17840	0.00347705146036161	0.00123318385650224	2.799099e-02	0.6731420	hsa:3416,IDE,3416:down|hsa:10018,BCL2L11,10018:up|hsa:5366,PMAIP1,5366:up|hsa:637,BID,637:up|hsa:638,BIK,638:up	http://amigo.geneontology.org/cgi-bin/amigo/term_details?term=GO:0032461
regulation of response to interferon-gamma	Biological Process	GO:0060330	5	22	1438	17840	0.00347705146036161	0.00123318385650224	2.799099e-02	0.6731420	hsa:5771,PTPN2,5771:up|hsa:3717,JAK2,3717:up|hsa:8651,SOCS1,8651:up|hsa:9093,DNAJA3,9093:up|hsa:83666,PARP9,83666:up	http://amigo.geneontology.org/cgi-bin/amigo/term_details?term=GO:0060330
interleukin-6 production	Biological Process	GO:0032635	15	109	1438	17840	0.0104311543810848	0.00610986547085202	2.848917e-02	0.6731420	hsa:27177,IL36B,27177:down|hsa:7097,TLR2,7097:up|hsa:114899,C1QTNF3,114899:down|hsa:1535,CYBA,1535:up|hsa:64170,CARD9,64170:up|hsa:2069,EREG,2069:down|hsa:2277,FIGF,2277:up|hsa:148022,TICAM1,148022:down|hsa:197358,NLRC3,197358:up|hsa:5603,MAPK13,5603:down|hsa:116,ADCYAP1,116:up|hsa:64343,AZI2,64343:up|hsa:338322,NLRP10,338322:down|hsa:7096,TLR1,7096:up|hsa:7474,WNT5A,7474:up	http://amigo.geneontology.org/cgi-bin/amigo/term_details?term=GO:0032635
regulation of cytoskeleton organization	Biological Process	GO:0051493	44	408	1438	17840	0.0305980528511822	0.0228699551569507	2.916688e-02	0.6731420	hsa:6712,SPTBN2,6712:down|hsa:10602,CDC42EP3,10602:up|hsa:8936,WASF1,8936:up|hsa:25802,LMOD1,25802:down|hsa:50810,HDGFRP3,50810:up|hsa:4869,NPM1,4869:up|hsa:90167,FRMD7,90167:down|hsa:891,CCNB1,891:up|hsa:3925,STMN1,3925:up|hsa:85477,SCIN,85477:down|hsa:5756,TWF1,5756:up|hsa:57026,PDXP,57026:up|hsa:23607,CD2AP,23607:up|hsa:4751,NEK2,4751:down|hsa:7984,ARHGEF5,7984:down|hsa:6548,SLC9A1,6548:down|h…	http://amigo.geneontology.org/cgi-bin/amigo/term_details?term=GO:0051493
cardiac muscle tissue development	Biological Process	GO:0048738	21	168	1438	17840	0.0146036161335188	0.0094170403587444	2.934971e-02	0.6731420	hsa:9150,CTDP1,9150:down|hsa:26585,GREM1,26585:down|hsa:90,ACVR1,90:up|hsa:70,ACTC1,70:down|hsa:4878,NPPA,4878:up|hsa:7135,TNNI1,7135:up|hsa:891,CCNB1,891:up|hsa:2296,FOXC1,2296:up|hsa:91624,NEXN,91624:up|hsa:4629,MYH11,4629:down|hsa:7474,WNT5A,7474:up|hsa:811,CALR,811:up|hsa:23363,OBSL1,23363:up|hsa:10529,NEBL,10529:down|hsa:1829,DSG2,1829:up|hsa:6548,SLC9A1,6548:down|hsa:3776,KCNK2,3776:up|hsa:…	http://amigo.geneontology.org/cgi-bin/amigo/term_details?term=GO:0048738
zymogen activation	Biological Process	GO:0031638	16	119	1438	17840	0.0111265646731572	0.00667040358744395	2.940620e-02	0.6731420	hsa:51065,RPS27L,51065:up|hsa:9451,EIF2AK3,9451:up|hsa:8743,TNFSF10,8743:up|hsa:2266,FGG,2266:down|hsa:26999,CYFIP2,26999:up|hsa:637,BID,637:up|hsa:5366,PMAIP1,5366:up|hsa:9093,DNAJA3,9093:up|hsa:835,CASP2,835:up|hsa:3717,JAK2,3717:up|hsa:2244,FGB,2244:down|hsa:5054,SERPINE1,5054:up|hsa:841,CASP8,841:up|hsa:112399,EGLN3,112399:down|hsa:10018,BCL2L11,10018:up|hsa:9994,CASP8AP2,9994:up	http://amigo.geneontology.org/cgi-bin/amigo/term_details?term=GO:0031638
protein localization to organelle	Biological Process	GO:0033365	85	862	1438	17840	0.0591098748261474	0.0483183856502242	2.960761e-02	0.6731420	hsa:10527,IPO7,10527:up|hsa:546,ATRX,546:up|hsa:6235,RPS29,6235:up|hsa:1950,EGF,1950:up|hsa:9451,EIF2AK3,9451:up|hsa:157570,ESCO2,157570:up|hsa:637,BID,637:up|hsa:6491,STIL,6491:up|hsa:22948,CCT5,22948:up|hsa:23607,CD2AP,23607:up|hsa:5366,PMAIP1,5366:up|hsa:10628,TXNIP,10628:down|hsa:3479,IGF1,3479:down|hsa:55294,FBXW7,55294:down|hsa:81573,ANKRD13C,81573:up|hsa:1408,CRY2,1408:down|hsa:51706,CYB5R…	http://amigo.geneontology.org/cgi-bin/amigo/term_details?term=GO:0033365
muscle contraction	Biological Process	GO:0006936	36	323	1438	17840	0.0250347705146036	0.0181053811659193	2.963394e-02	0.6731420	hsa:4622,MYH4,4622:down|hsa:3728,JUP,3728:down|hsa:70,ACTC1,70:down|hsa:1410,CRYAB,1410:down|hsa:7094,TLN1,7094:up|hsa:25802,LMOD1,25802:down|hsa:8082,SSPN,8082:up|hsa:7135,TNNI1,7135:up|hsa:18,ABAT,18:up|hsa:10021,HCN4,10021:up|hsa:1113,CHGA,1113:up|hsa:9456,HOMER1,9456:up|hsa:1829,DSG2,1829:up|hsa:6548,SLC9A1,6548:down|hsa:5742,PTGS1,5742:down|hsa:5144,PDE4D,5144:down|hsa:3320,HSP90AA1,3320:up|…	http://amigo.geneontology.org/cgi-bin/amigo/term_details?term=GO:0006936
DNA topological change	Biological Process	GO:0006265	3	9	1438	17840	0.00208623087621697	0.000504484304932735	3.035096e-02	0.6731420	hsa:7153,TOP2A,7153:up|hsa:7155,TOP2B,7155:up|hsa:7150,TOP1,7150:up	http://amigo.geneontology.org/cgi-bin/amigo/term_details?term=GO:0006265
heterochromatin assembly	Biological Process	GO:0031507	3	9	1438	17840	0.00208623087621697	0.000504484304932735	3.035096e-02	0.6731420	hsa:3070,HELLS,3070:up|hsa:7175,TPR,7175:up|hsa:1029,CDKN2A,1029:up	http://amigo.geneontology.org/cgi-bin/amigo/term_details?term=GO:0031507
cardiac muscle fiber development	Biological Process	GO:0048739	3	9	1438	17840	0.00208623087621697	0.000504484304932735	3.035096e-02	0.6731420	hsa:652,BMP4,652:down|hsa:91624,NEXN,91624:up|hsa:4629,MYH11,4629:down	http://amigo.geneontology.org/cgi-bin/amigo/term_details?term=GO:0048739
facial nerve structural organization	Biological Process	GO:0021612	3	9	1438	17840	0.00208623087621697	0.000504484304932735	3.035096e-02	0.6731420	hsa:91584,PLXNA4,91584:down|hsa:3212,HOXB2,3212:down|hsa:1959,EGR2,1959:up	http://amigo.geneontology.org/cgi-bin/amigo/term_details?term=GO:0021612
protein localization to nuclear body	Biological Process	GO:1903405	3	9	1438	17840	0.00208623087621697	0.000504484304932735	3.035096e-02	0.6731420	hsa:22948,CCT5,22948:up|hsa:10576,CCT2,10576:up|hsa:6950,TCP1,6950:up	http://amigo.geneontology.org/cgi-bin/amigo/term_details?term=GO:1903405
regulation of systemic arterial blood pressure by norepinephrine-epinephrine	Biological Process	GO:0001993	3	9	1438	17840	0.00208623087621697	0.000504484304932735	3.035096e-02	0.6731420	hsa:154,ADRB2,154:down|hsa:5144,PDE4D,5144:down|hsa:7168,TPM1,7168:up	http://amigo.geneontology.org/cgi-bin/amigo/term_details?term=GO:0001993
regulation of translational termination	Biological Process	GO:0006449	3	9	1438	17840	0.00208623087621697	0.000504484304932735	3.035096e-02	0.6731420	hsa:10247,RIDA,10247:up|hsa:9617,MTRF1,9617:up|hsa:56648,EIF5A2,56648:up	http://amigo.geneontology.org/cgi-bin/amigo/term_details?term=GO:0006449
response to sterol depletion	Biological Process	GO:0006991	3	9	1438	17840	0.00208623087621697	0.000504484304932735	3.035096e-02	0.6731420	hsa:55294,FBXW7,55294:down|hsa:51141,INSIG2,51141:up|hsa:11160,ERLIN2,11160:up	http://amigo.geneontology.org/cgi-bin/amigo/term_details?term=GO:0006991
protein localization to microtubule	Biological Process	GO:0035372	3	9	1438	17840	0.00208623087621697	0.000504484304932735	3.035096e-02	0.6731420	hsa:11043,MID2,11043:down|hsa:9585,KIF20B,9585:up|hsa:4281,MID1,4281:down	http://amigo.geneontology.org/cgi-bin/amigo/term_details?term=GO:0035372
iris morphogenesis	Biological Process	GO:0061072	3	9	1438	17840	0.00208623087621697	0.000504484304932735	3.035096e-02	0.6731420	hsa:3091,HIF1A,3091:up|hsa:28996,HIPK2,28996:up|hsa:7482,WNT2B,7482:down	http://amigo.geneontology.org/cgi-bin/amigo/term_details?term=GO:0061072
response to interleukin-2	Biological Process	GO:0070669	3	9	1438	17840	0.00208623087621697	0.000504484304932735	3.035096e-02	0.6731420	hsa:5771,PTPN2,5771:up|hsa:3559,IL2RA,3559:up|hsa:3561,IL2RG,3561:up	http://amigo.geneontology.org/cgi-bin/amigo/term_details?term=GO:0070669
positive regulation of podosome assembly	Biological Process	GO:0071803	3	9	1438	17840	0.00208623087621697	0.000504484304932735	3.035096e-02	0.6731420	hsa:6624,FSCN1,6624:up|hsa:3567,IL5,3567:down|hsa:7984,ARHGEF5,7984:down	http://amigo.geneontology.org/cgi-bin/amigo/term_details?term=GO:0071803
positive regulation of protein homooligomerization	Biological Process	GO:0032464	3	9	1438	17840	0.00208623087621697	0.000504484304932735	3.035096e-02	0.6731420	hsa:10018,BCL2L11,10018:up|hsa:637,BID,637:up|hsa:638,BIK,638:up	http://amigo.geneontology.org/cgi-bin/amigo/term_details?term=GO:0032464
positive regulation of endoplasmic reticulum stress-induced intrinsic apoptotic signaling pathway	Biological Process	GO:1902237	3	9	1438	17840	0.00208623087621697	0.000504484304932735	3.035096e-02	0.6731420	hsa:5771,PTPN2,5771:up|hsa:10018,BCL2L11,10018:up|hsa:5366,PMAIP1,5366:up	http://amigo.geneontology.org/cgi-bin/amigo/term_details?term=GO:1902237
regulation of glucocorticoid receptor signaling pathway	Biological Process	GO:2000322	3	9	1438	17840	0.00208623087621697	0.000504484304932735	3.035096e-02	0.6731420	hsa:1408,CRY2,1408:down|hsa:55885,LMO3,55885:up|hsa:5187,PER1,5187:down	http://amigo.geneontology.org/cgi-bin/amigo/term_details?term=GO:2000322
histone H4-K20 methylation	Biological Process	GO:0034770	3	9	1438	17840	0.00208623087621697	0.000504484304932735	3.035096e-02	0.6731420	hsa:7468,WHSC1,7468:up|hsa:51742,ARID4B,51742:up|hsa:672,BRCA1,672:up	http://amigo.geneontology.org/cgi-bin/amigo/term_details?term=GO:0034770
protein localization to nucleoplasm	Biological Process	GO:1990173	3	9	1438	17840	0.00208623087621697	0.000504484304932735	3.035096e-02	0.6731420	hsa:22948,CCT5,22948:up|hsa:10576,CCT2,10576:up|hsa:6950,TCP1,6950:up	http://amigo.geneontology.org/cgi-bin/amigo/term_details?term=GO:1990173
positive regulation of cellular component biogenesis	Biological Process	GO:0044089	45	420	1438	17840	0.0312934631432545	0.023542600896861	3.045284e-02	0.6731420	hsa:10602,CDC42EP3,10602:up|hsa:8936,WASF1,8936:up|hsa:54869,EPS8L1,54869:down|hsa:638,BIK,638:up|hsa:6662,SOX9,6662:up|hsa:90167,FRMD7,90167:down|hsa:2047,EPHB1,2047:down|hsa:9378,NRXN1,9378:down|hsa:637,BID,637:up|hsa:55329,MNS1,55329:up|hsa:1113,CHGA,1113:up|hsa:85477,SCIN,85477:down|hsa:9738,CCP110,9738:up|hsa:5366,PMAIP1,5366:up|hsa:3038,HAS3,3038:up|hsa:23316,CUX2,23316:up|hsa:7984,ARHGEF5,…	http://amigo.geneontology.org/cgi-bin/amigo/term_details?term=GO:0044089
regulation of extrinsic apoptotic signaling pathway via death domain receptors	Biological Process	GO:1902041	9	55	1438	17840	0.0062586926286509	0.00308295964125561	3.062961e-02	0.6731420	hsa:3958,LGALS3,3958:down|hsa:6788,STK3,6788:up|hsa:5366,PMAIP1,5366:up|hsa:8743,TNFSF10,8743:up|hsa:2266,FGG,2266:down|hsa:2244,FGB,2244:down|hsa:5054,SERPINE1,5054:up|hsa:672,BRCA1,672:up|hsa:841,CASP8,841:up	http://amigo.geneontology.org/cgi-bin/amigo/term_details?term=GO:1902041
regulation of protein depolymerization	Biological Process	GO:1901879	11	73	1438	17840	0.00764951321279555	0.00409192825112108	3.133147e-02	0.6731420	hsa:5756,TWF1,5756:up|hsa:29765,TMOD4,29765:up|hsa:6712,SPTBN2,6712:down|hsa:57026,PDXP,57026:up|hsa:57159,TRIM54,57159:up|hsa:10677,AVIL,10677:up|hsa:25802,LMOD1,25802:down|hsa:50810,HDGFRP3,50810:up|hsa:830,CAPZA2,830:up|hsa:4281,MID1,4281:down|hsa:85477,SCIN,85477:down	http://amigo.geneontology.org/cgi-bin/amigo/term_details?term=GO:1901879
actin filament bundle organization	Biological Process	GO:0061572	16	120	1438	17840	0.0111265646731572	0.00672645739910314	3.148907e-02	0.6731420	hsa:84501,SPIRE2,84501:up|hsa:7184,HSP90B1,7184:up|hsa:5734,PTGER4,5734:up|hsa:87,ACTN1,87:up|hsa:90167,FRMD7,90167:down|hsa:359845,FAM101B,359845:up|hsa:57026,PDXP,57026:up|hsa:6624,FSCN1,6624:up|hsa:7984,ARHGEF5,7984:down|hsa:6548,SLC9A1,6548:down|hsa:83715,ESPN,83715:down|hsa:6093,ROCK1,6093:up|hsa:7168,TPM1,7168:up|hsa:154796,AMOT,154796:down|hsa:11346,SYNPO,11346:up|hsa:9475,ROCK2,9475:up	http://amigo.geneontology.org/cgi-bin/amigo/term_details?term=GO:0061572
regulation of epidermal growth factor-activated receptor activity	Biological Process	GO:0007176	5	23	1438	17840	0.00347705146036161	0.00128923766816143	3.346310e-02	0.6731420	hsa:55294,FBXW7,55294:down|hsa:1950,EGF,1950:up|hsa:9148,NEURL1,9148:down|hsa:2069,EREG,2069:down|hsa:122809,SOCS4,122809:up	http://amigo.geneontology.org/cgi-bin/amigo/term_details?term=GO:0007176
sister chromatid segregation	Biological Process	GO:0000819	25	211	1438	17840	0.0173852573018081	0.0118273542600897	3.352288e-02	0.6731420	hsa:90417,KNSTRN,90417:up|hsa:114799,ESCO1,114799:up|hsa:546,ATRX,546:up|hsa:1063,CENPF,1063:up|hsa:10735,STAG2,10735:up|hsa:10403,NDC80,10403:up|hsa:7155,TOP2B,7155:up|hsa:6232,RPS27,6232:down|hsa:64105,CENPK,64105:up|hsa:10592,SMC2,10592:up|hsa:891,CCNB1,891:up|hsa:55055,ZWILCH,55055:up|hsa:7153,TOP2A,7153:up|hsa:7175,TPR,7175:up|hsa:7514,XPO1,7514:up|hsa:151246,SGO2,151246:up|hsa:113130,CDCA5,…	http://amigo.geneontology.org/cgi-bin/amigo/term_details?term=GO:0000819
release of cytochrome c from mitochondria	Biological Process	GO:0001836	9	56	1438	17840	0.0062586926286509	0.0031390134529148	3.398193e-02	0.6731420	hsa:5366,PMAIP1,5366:up|hsa:597,BCL2A1,597:up|hsa:10962,MLLT11,10962:up|hsa:638,BIK,638:up|hsa:3479,IGF1,3479:down|hsa:8743,TNFSF10,8743:up|hsa:10018,BCL2L11,10018:up|hsa:637,BID,637:up|hsa:9141,PDCD5,9141:up	http://amigo.geneontology.org/cgi-bin/amigo/term_details?term=GO:0001836
regulation of action potential	Biological Process	GO:0098900	7	39	1438	17840	0.00486787204450626	0.00218609865470852	3.430978e-02	0.6731420	hsa:6548,SLC9A1,6548:down|hsa:5774,PTPN3,5774:down|hsa:3745,KCNB1,3745:down|hsa:3728,JUP,3728:down|hsa:1824,DSC2,1824:up|hsa:3759,KCNJ2,3759:down|hsa:1829,DSG2,1829:up	http://amigo.geneontology.org/cgi-bin/amigo/term_details?term=GO:0098900
Wnt signaling pathway, calcium modulating pathway	Biological Process	GO:0007223	7	39	1438	17840	0.00486787204450626	0.00218609865470852	3.430978e-02	0.6731420	hsa:51701,NLK,51701:up|hsa:5532,PPP3CB,5532:up|hsa:5158,PDE6B,5158:up|hsa:2535,FZD2,2535:up|hsa:5145,PDE6A,5145:up|hsa:7976,FZD3,7976:up|hsa:7474,WNT5A,7474:up	http://amigo.geneontology.org/cgi-bin/amigo/term_details?term=GO:0007223
negative regulation of actin filament depolymerization	Biological Process	GO:0030835	7	39	1438	17840	0.00486787204450626	0.00218609865470852	3.430978e-02	0.6731420	hsa:5756,TWF1,5756:up|hsa:29765,TMOD4,29765:up|hsa:6712,SPTBN2,6712:down|hsa:10677,AVIL,10677:up|hsa:830,CAPZA2,830:up|hsa:25802,LMOD1,25802:down|hsa:85477,SCIN,85477:down	http://amigo.geneontology.org/cgi-bin/amigo/term_details?term=GO:0030835
endoplasmic reticulum organization	Biological Process	GO:0007029	7	39	1438	17840	0.00486787204450626	0.00218609865470852	3.430978e-02	0.6731420	hsa:3998,LMAN1,3998:up|hsa:51308,REEP2,51308:up|hsa:81671,VMP1,81671:up|hsa:65055,REEP1,65055:up|hsa:23204,ARL6IP1,23204:up|hsa:55161,TMEM33,55161:up|hsa:9451,EIF2AK3,9451:up	http://amigo.geneontology.org/cgi-bin/amigo/term_details?term=GO:0007029
response to testosterone	Biological Process	GO:0033574	7	39	1438	17840	0.00486787204450626	0.00218609865470852	3.430978e-02	0.6731420	hsa:811,CALR,811:up|hsa:154,ADRB2,154:down|hsa:652,BMP4,652:down|hsa:9475,ROCK2,9475:up|hsa:1786,DNMT1,1786:up|hsa:5723,PSPH,5723:up|hsa:7474,WNT5A,7474:up	http://amigo.geneontology.org/cgi-bin/amigo/term_details?term=GO:0033574
regulation of protein localization	Biological Process	GO:0032880	93	959	1438	17840	0.064673157162726	0.0537556053811659	3.439075e-02	0.6731420	hsa:23086,EXPH5,23086:down|hsa:26253,CLEC4E,26253:down|hsa:27242,TNFRSF21,27242:up|hsa:1950,EGF,1950:up|hsa:9451,EIF2AK3,9451:up|hsa:2266,FGG,2266:down|hsa:18,ABAT,18:up|hsa:891,CCNB1,891:up|hsa:9378,NRXN1,9378:down|hsa:637,BID,637:up|hsa:338322,NLRP10,338322:down|hsa:7474,WNT5A,7474:up|hsa:22948,CCT5,22948:up|hsa:8651,SOCS1,8651:up|hsa:23607,CD2AP,23607:up|hsa:5366,PMAIP1,5366:up|hsa:3479,IGF1,3…	http://amigo.geneontology.org/cgi-bin/amigo/term_details?term=GO:0032880
maintenance of location in cell	Biological Process	GO:0051651	18	141	1438	17840	0.0125173852573018	0.00790358744394619	3.459263e-02	0.6731420	hsa:90417,KNSTRN,90417:up|hsa:11116,FGFR1OP,11116:up|hsa:9648,GCC2,9648:up|hsa:57662,CAMSAP3,57662:down|hsa:3728,JUP,3728:down|hsa:7094,TLN1,7094:up|hsa:57120,GOPC,57120:up|hsa:259266,ASPM,259266:up|hsa:10403,NDC80,10403:up|hsa:891,CCNB1,891:up|hsa:487,ATP2A1,487:up|hsa:85477,SCIN,85477:down|hsa:5756,TWF1,5756:up|hsa:675,BRCA2,675:up|hsa:4751,NEK2,4751:down|hsa:23345,SYNE1,23345:down|hsa:81573,AN…	http://amigo.geneontology.org/cgi-bin/amigo/term_details?term=GO:0051651
cell cycle DNA replication	Biological Process	GO:0044786	6	31	1438	17840	0.00417246175243394	0.00173766816143498	3.490226e-02	0.6731420	hsa:9837,GINS1,9837:up|hsa:55294,FBXW7,55294:down|hsa:546,ATRX,546:up|hsa:54962,TIPIN,54962:up|hsa:1602,DACH1,1602:up|hsa:10735,STAG2,10735:up	http://amigo.geneontology.org/cgi-bin/amigo/term_details?term=GO:0044786
maternal placenta development	Biological Process	GO:0001893	6	31	1438	17840	0.00417246175243394	0.00173766816143498	3.490226e-02	0.6731420	hsa:7421,VDR,7421:up|hsa:659,BMPR2,659:up|hsa:1508,CTSB,1508:up|hsa:2706,GJB2,2706:up|hsa:6781,STC1,6781:up|hsa:1515,CTSV,1515:up	http://amigo.geneontology.org/cgi-bin/amigo/term_details?term=GO:0001893
ureter smooth muscle cell differentiation	Biological Process	GO:0072193	2	4	1438	17840	0.00139082058414465	0.000224215246636771	3.490294e-02	0.6731420	hsa:652,BMP4,652:down|hsa:6662,SOX9,6662:up	http://amigo.geneontology.org/cgi-bin/amigo/term_details?term=GO:0072193
muscular septum morphogenesis	Biological Process	GO:0003150	2	4	1438	17840	0.00139082058414465	0.000224215246636771	3.490294e-02	0.6731420	hsa:2535,FZD2,2535:up|hsa:57216,VANGL2,57216:up	http://amigo.geneontology.org/cgi-bin/amigo/term_details?term=GO:0003150
negative regulation of bicellular tight junction assembly	Biological Process	GO:1903347	2	4	1438	17840	0.00139082058414465	0.000224215246636771	3.490294e-02	0.6731420	hsa:6093,ROCK1,6093:up|hsa:9475,ROCK2,9475:up	http://amigo.geneontology.org/cgi-bin/amigo/term_details?term=GO:1903347
programmed DNA elimination	Biological Process	GO:0031049	2	4	1438	17840	0.00139082058414465	0.000224215246636771	3.490294e-02	0.6731420	hsa:672,BRCA1,672:up|hsa:675,BRCA2,675:up	http://amigo.geneontology.org/cgi-bin/amigo/term_details?term=GO:0031049
ureter smooth muscle development	Biological Process	GO:0072191	2	4	1438	17840	0.00139082058414465	0.000224215246636771	3.490294e-02	0.6731420	hsa:652,BMP4,652:down|hsa:6662,SOX9,6662:up	http://amigo.geneontology.org/cgi-bin/amigo/term_details?term=GO:0072191
spontaneous neurotransmitter secretion	Biological Process	GO:0061669	2	4	1438	17840	0.00139082058414465	0.000224215246636771	3.490294e-02	0.6731420	hsa:112755,STX1B,112755:up|hsa:9699,RIMS2,9699:up	http://amigo.geneontology.org/cgi-bin/amigo/term_details?term=GO:0061669
negative regulation of prostatic bud formation	Biological Process	GO:0060686	2	4	1438	17840	0.00139082058414465	0.000224215246636771	3.490294e-02	0.6731420	hsa:652,BMP4,652:down|hsa:7474,WNT5A,7474:up	http://amigo.geneontology.org/cgi-bin/amigo/term_details?term=GO:0060686
negative regulation of odontogenesis	Biological Process	GO:0042483	2	4	1438	17840	0.00139082058414465	0.000224215246636771	3.490294e-02	0.6731420	hsa:4982,TNFRSF11B,4982:up|hsa:54829,ASPN,54829:up	http://amigo.geneontology.org/cgi-bin/amigo/term_details?term=GO:0042483
pyridine nucleotide catabolic process	Biological Process	GO:0019364	2	4	1438	17840	0.00139082058414465	0.000224215246636771	3.490294e-02	0.6731420	hsa:57103,TIGAR,57103:up|hsa:83594,NUDT12,83594:up	http://amigo.geneontology.org/cgi-bin/amigo/term_details?term=GO:0019364
positive regulation of branching involved in lung morphogenesis	Biological Process	GO:0061047	2	4	1438	17840	0.00139082058414465	0.000224215246636771	3.490294e-02	0.6731420	hsa:652,BMP4,652:down|hsa:7482,WNT2B,7482:down	http://amigo.geneontology.org/cgi-bin/amigo/term_details?term=GO:0061047
anterior commissure morphogenesis	Biological Process	GO:0021960	2	4	1438	17840	0.00139082058414465	0.000224215246636771	3.490294e-02	0.6731420	hsa:91584,PLXNA4,91584:down|hsa:25987,TSKU,25987:up	http://amigo.geneontology.org/cgi-bin/amigo/term_details?term=GO:0021960
chromosome breakage	Biological Process	GO:0031052	2	4	1438	17840	0.00139082058414465	0.000224215246636771	3.490294e-02	0.6731420	hsa:672,BRCA1,672:up|hsa:675,BRCA2,675:up	http://amigo.geneontology.org/cgi-bin/amigo/term_details?term=GO:0031052
regulation of DNA topoisomerase (ATP-hydrolyzing) activity	Biological Process	GO:2000371	2	4	1438	17840	0.00139082058414465	0.000224215246636771	3.490294e-02	0.6731420	hsa:5359,PLSCR1,5359:up|hsa:29128,UHRF1,29128:up	http://amigo.geneontology.org/cgi-bin/amigo/term_details?term=GO:2000371
negative regulation of oocyte development	Biological Process	GO:0060283	2	4	1438	17840	0.00139082058414465	0.000224215246636771	3.490294e-02	0.6731420	hsa:4882,NPR2,4882:down|hsa:3479,IGF1,3479:down	http://amigo.geneontology.org/cgi-bin/amigo/term_details?term=GO:0060283
regulation of interleukin-1 alpha secretion	Biological Process	GO:0050705	2	4	1438	17840	0.00139082058414465	0.000224215246636771	3.490294e-02	0.6731420	hsa:24145,PANX1,24145:up|hsa:5734,PTGER4,5734:up	http://amigo.geneontology.org/cgi-bin/amigo/term_details?term=GO:0050705
histone H3-S10 phosphorylation	Biological Process	GO:0043987	2	4	1438	17840	0.00139082058414465	0.000224215246636771	3.490294e-02	0.6731420	hsa:891,CCNB1,891:up|hsa:7443,VRK1,7443:up	http://amigo.geneontology.org/cgi-bin/amigo/term_details?term=GO:0043987
negative regulation of bone mineralization involved in bone maturation	Biological Process	GO:1900158	2	4	1438	17840	0.00139082058414465	0.000224215246636771	3.490294e-02	0.6731420	hsa:26585,GREM1,26585:down|hsa:359845,FAM101B,359845:up	http://amigo.geneontology.org/cgi-bin/amigo/term_details?term=GO:1900158
positive regulation of Golgi to plasma membrane protein transport	Biological Process	GO:0042998	2	4	1438	17840	0.00139082058414465	0.000224215246636771	3.490294e-02	0.6731420	hsa:163882,CNST,163882:down|hsa:2181,ACSL3,2181:up	http://amigo.geneontology.org/cgi-bin/amigo/term_details?term=GO:0042998
positive regulation of DNA topoisomerase (ATP-hydrolyzing) activity	Biological Process	GO:2000373	2	4	1438	17840	0.00139082058414465	0.000224215246636771	3.490294e-02	0.6731420	hsa:5359,PLSCR1,5359:up|hsa:29128,UHRF1,29128:up	http://amigo.geneontology.org/cgi-bin/amigo/term_details?term=GO:2000373
endothelial cell-cell adhesion	Biological Process	GO:0071603	2	4	1438	17840	0.00139082058414465	0.000224215246636771	3.490294e-02	0.6731420	hsa:3728,JUP,3728:down|hsa:7060,THBS4,7060:up	http://amigo.geneontology.org/cgi-bin/amigo/term_details?term=GO:0071603
atrial septum primum morphogenesis	Biological Process	GO:0003289	2	4	1438	17840	0.00139082058414465	0.000224215246636771	3.490294e-02	0.6731420	hsa:7468,WHSC1,7468:up|hsa:90,ACVR1,90:up	http://amigo.geneontology.org/cgi-bin/amigo/term_details?term=GO:0003289
negative regulation of mitochondrial membrane potential	Biological Process	GO:0010917	2	4	1438	17840	0.00139082058414465	0.000224215246636771	3.490294e-02	0.6731420	hsa:5366,PMAIP1,5366:up|hsa:10550,ARL6IP5,10550:up	http://amigo.geneontology.org/cgi-bin/amigo/term_details?term=GO:0010917
positive regulation of norepinephrine secretion	Biological Process	GO:0010701	2	4	1438	17840	0.00139082058414465	0.000224215246636771	3.490294e-02	0.6731420	hsa:3745,KCNB1,3745:down|hsa:6804,STX1A,6804:up	http://amigo.geneontology.org/cgi-bin/amigo/term_details?term=GO:0010701
positive regulation of heart rate by epinephrine-norepinephrine	Biological Process	GO:0001996	2	4	1438	17840	0.00139082058414465	0.000224215246636771	3.490294e-02	0.6731420	hsa:5144,PDE4D,5144:down|hsa:7168,TPM1,7168:up	http://amigo.geneontology.org/cgi-bin/amigo/term_details?term=GO:0001996
trachea cartilage morphogenesis	Biological Process	GO:0060535	2	4	1438	17840	0.00139082058414465	0.000224215246636771	3.490294e-02	0.6731420	hsa:4040,LRP6,4040:up|hsa:3202,HOXA5,3202:down	http://amigo.geneontology.org/cgi-bin/amigo/term_details?term=GO:0060535
parallel actin filament bundle assembly	Biological Process	GO:0030046	2	4	1438	17840	0.00139082058414465	0.000224215246636771	3.490294e-02	0.6731420	hsa:83715,ESPN,83715:down|hsa:84501,SPIRE2,84501:up	http://amigo.geneontology.org/cgi-bin/amigo/term_details?term=GO:0030046
lens induction in camera-type eye	Biological Process	GO:0060235	2	4	1438	17840	0.00139082058414465	0.000224215246636771	3.490294e-02	0.6731420	hsa:652,BMP4,652:down|hsa:28996,HIPK2,28996:up	http://amigo.geneontology.org/cgi-bin/amigo/term_details?term=GO:0060235
mitotic chromosome movement towards spindle pole	Biological Process	GO:0007079	2	4	1438	17840	0.00139082058414465	0.000224215246636771	3.490294e-02	0.6731420	hsa:1062,CENPE,1062:up|hsa:3837,KPNB1,3837:up	http://amigo.geneontology.org/cgi-bin/amigo/term_details?term=GO:0007079
intestinal epithelial cell maturation	Biological Process	GO:0060574	2	4	1438	17840	0.00139082058414465	0.000224215246636771	3.490294e-02	0.6731420	hsa:3091,HIF1A,3091:up|hsa:3202,HOXA5,3202:down	http://amigo.geneontology.org/cgi-bin/amigo/term_details?term=GO:0060574
detection of bacterial lipoprotein	Biological Process	GO:0042494	2	4	1438	17840	0.00139082058414465	0.000224215246636771	3.490294e-02	0.6731420	hsa:7097,TLR2,7097:up|hsa:7096,TLR1,7096:up	http://amigo.geneontology.org/cgi-bin/amigo/term_details?term=GO:0042494
negative regulation of branching involved in ureteric bud morphogenesis	Biological Process	GO:0090191	2	4	1438	17840	0.00139082058414465	0.000224215246636771	3.490294e-02	0.6731420	hsa:26585,GREM1,26585:down|hsa:652,BMP4,652:down	http://amigo.geneontology.org/cgi-bin/amigo/term_details?term=GO:0090191
positive regulation of mesenchymal stem cell differentiation	Biological Process	GO:2000741	2	4	1438	17840	0.00139082058414465	0.000224215246636771	3.490294e-02	0.6731420	hsa:55553,SOX6,55553:down|hsa:6662,SOX9,6662:up	http://amigo.geneontology.org/cgi-bin/amigo/term_details?term=GO:2000741
preganglionic parasympathetic fiber development	Biological Process	GO:0021783	4	16	1438	17840	0.00278164116828929	0.000896860986547085	3.493164e-02	0.6731420	hsa:401,PHOX2A,401:up|hsa:91584,PLXNA4,91584:down|hsa:3212,HOXB2,3212:down|hsa:1959,EGR2,1959:up	http://amigo.geneontology.org/cgi-bin/amigo/term_details?term=GO:0021783
DNA damage response, signal transduction resulting in transcription	Biological Process	GO:0042772	4	16	1438	17840	0.00278164116828929	0.000896860986547085	3.493164e-02	0.6731420	hsa:672,BRCA1,672:up|hsa:675,BRCA2,675:up|hsa:28996,HIPK2,28996:up|hsa:55544,RBM38,55544:up	http://amigo.geneontology.org/cgi-bin/amigo/term_details?term=GO:0042772
microtubule organizing center organization	Biological Process	GO:0031023	15	112	1438	17840	0.0104311543810848	0.0062780269058296	3.523817e-02	0.6731420	hsa:22995,CEP152,22995:up|hsa:9648,GCC2,9648:up|hsa:7514,XPO1,7514:up|hsa:675,BRCA2,675:up|hsa:9738,CCP110,9738:up|hsa:4659,PPP1R12A,4659:up|hsa:10806,SDCCAG8,10806:up|hsa:4751,NEK2,4751:down|hsa:4869,NPM1,4869:up|hsa:672,BRCA1,672:up|hsa:899,CCNF,899:up|hsa:6491,STIL,6491:up|hsa:163786,SASS6,163786:up|hsa:9475,ROCK2,9475:up|hsa:54875,CNTLN,54875:up	http://amigo.geneontology.org/cgi-bin/amigo/term_details?term=GO:0031023
cell cycle phase transition	Biological Process	GO:0044770	54	523	1438	17840	0.0375521557719054	0.0293161434977578	3.563070e-02	0.6731420	hsa:22995,CEP152,22995:up|hsa:9134,CCNE2,9134:up|hsa:10142,AKAP9,10142:up|hsa:11116,FGFR1OP,11116:up|hsa:9150,CTDP1,9150:down|hsa:152110,NEK10,152110:up|hsa:90,ACVR1,90:up|hsa:4175,MCM6,4175:up|hsa:80321,CEP70,80321:up|hsa:4659,PPP1R12A,4659:up|hsa:10383,TUBB4B,10383:down|hsa:5721,PSME2,5721:up|hsa:54962,TIPIN,54962:up|hsa:1063,CENPF,1063:up|hsa:4869,NPM1,4869:up|hsa:891,CCNB1,891:up|hsa:641,BLM,…	http://amigo.geneontology.org/cgi-bin/amigo/term_details?term=GO:0044770
cardiac muscle cell contraction	Biological Process	GO:0086003	8	48	1438	17840	0.00556328233657858	0.00269058295964126	3.657965e-02	0.6731420	hsa:3728,JUP,3728:down|hsa:1824,DSC2,1824:up|hsa:3759,KCNJ2,3759:down|hsa:1829,DSG2,1829:up|hsa:6548,SLC9A1,6548:down|hsa:5144,PDE4D,5144:down|hsa:3757,KCNH2,3757:up|hsa:6781,STC1,6781:up	http://amigo.geneontology.org/cgi-bin/amigo/term_details?term=GO:0086003
regulation of actin filament depolymerization	Biological Process	GO:0030834	8	48	1438	17840	0.00556328233657858	0.00269058295964126	3.657965e-02	0.6731420	hsa:5756,TWF1,5756:up|hsa:29765,TMOD4,29765:up|hsa:6712,SPTBN2,6712:down|hsa:57026,PDXP,57026:up|hsa:10677,AVIL,10677:up|hsa:25802,LMOD1,25802:down|hsa:830,CAPZA2,830:up|hsa:85477,SCIN,85477:down	http://amigo.geneontology.org/cgi-bin/amigo/term_details?term=GO:0030834
positive regulation of endopeptidase activity	Biological Process	GO:0010950	18	142	1438	17840	0.0125173852573018	0.00795964125560538	3.674896e-02	0.6731420	hsa:51065,RPS27L,51065:up|hsa:5721,PSME2,5721:up|hsa:9451,EIF2AK3,9451:up|hsa:8743,TNFSF10,8743:up|hsa:26999,CYFIP2,26999:up|hsa:9141,PDCD5,9141:up|hsa:637,BID,637:up|hsa:5366,PMAIP1,5366:up|hsa:9093,DNAJA3,9093:up|hsa:10550,ARL6IP5,10550:up|hsa:6407,SEMG2,6407:down|hsa:835,CASP2,835:up|hsa:668,FOXL2,668:up|hsa:3717,JAK2,3717:up|hsa:841,CASP8,841:up|hsa:112399,EGLN3,112399:down|hsa:10018,BCL2L11,…	http://amigo.geneontology.org/cgi-bin/amigo/term_details?term=GO:0010950
regulation of interleukin-6 production	Biological Process	GO:0032675	14	103	1438	17840	0.00973574408901252	0.00577354260089686	3.676048e-02	0.6731420	hsa:27177,IL36B,27177:down|hsa:7097,TLR2,7097:up|hsa:114899,C1QTNF3,114899:down|hsa:1535,CYBA,1535:up|hsa:64170,CARD9,64170:up|hsa:2069,EREG,2069:down|hsa:2277,FIGF,2277:up|hsa:148022,TICAM1,148022:down|hsa:197358,NLRC3,197358:up|hsa:5603,MAPK13,5603:down|hsa:116,ADCYAP1,116:up|hsa:338322,NLRP10,338322:down|hsa:7096,TLR1,7096:up|hsa:7474,WNT5A,7474:up	http://amigo.geneontology.org/cgi-bin/amigo/term_details?term=GO:0032675
negative regulation of blood vessel morphogenesis	Biological Process	GO:2000181	11	75	1438	17840	0.00764951321279555	0.00420403587443946	3.730099e-02	0.6731420	hsa:79812,MMRN2,79812:down|hsa:7060,THBS4,7060:up|hsa:9314,KLF4,9314:down|hsa:3202,HOXA5,3202:down|hsa:5734,PTGER4,5734:up|hsa:5054,SERPINE1,5054:up|hsa:154,ADRB2,154:down|hsa:6093,ROCK1,6093:up|hsa:154796,AMOT,154796:down|hsa:9475,ROCK2,9475:up|hsa:2296,FOXC1,2296:up	http://amigo.geneontology.org/cgi-bin/amigo/term_details?term=GO:2000181
regulation of chromosome segregation	Biological Process	GO:0051983	11	75	1438	17840	0.00764951321279555	0.00420403587443946	3.730099e-02	0.6731420	hsa:90417,KNSTRN,90417:up|hsa:7175,TPR,7175:up|hsa:546,ATRX,546:up|hsa:1063,CENPF,1063:up|hsa:113130,CDCA5,113130:up|hsa:4751,NEK2,4751:down|hsa:79677,SMC6,79677:up|hsa:699,BUB1,699:up|hsa:1062,CENPE,1062:up|hsa:891,CCNB1,891:up|hsa:55719,SLF2,55719:up	http://amigo.geneontology.org/cgi-bin/amigo/term_details?term=GO:0051983
centrosome cycle	Biological Process	GO:0007098	11	75	1438	17840	0.00764951321279555	0.00420403587443946	3.730099e-02	0.6731420	hsa:22995,CEP152,22995:up|hsa:7514,XPO1,7514:up|hsa:675,BRCA2,675:up|hsa:9738,CCP110,9738:up|hsa:4751,NEK2,4751:down|hsa:4869,NPM1,4869:up|hsa:672,BRCA1,672:up|hsa:899,CCNF,899:up|hsa:6491,STIL,6491:up|hsa:163786,SASS6,163786:up|hsa:9475,ROCK2,9475:up	http://amigo.geneontology.org/cgi-bin/amigo/term_details?term=GO:0007098
activation of cysteine-type endopeptidase activity	Biological Process	GO:0097202	13	94	1438	17840	0.0090403337969402	0.00526905829596413	3.820165e-02	0.6731420	hsa:51065,RPS27L,51065:up|hsa:5366,PMAIP1,5366:up|hsa:9093,DNAJA3,9093:up|hsa:9451,EIF2AK3,9451:up|hsa:835,CASP2,835:up|hsa:8743,TNFSF10,8743:up|hsa:3717,JAK2,3717:up|hsa:10018,BCL2L11,10018:up|hsa:112399,EGLN3,112399:down|hsa:841,CASP8,841:up|hsa:26999,CYFIP2,26999:up|hsa:637,BID,637:up|hsa:9994,CASP8AP2,9994:up	http://amigo.geneontology.org/cgi-bin/amigo/term_details?term=GO:0097202
positive regulation of transport	Biological Process	GO:0051050	90	930	1438	17840	0.062586926286509	0.0521300448430493	3.860021e-02	0.6731420	hsa:23086,EXPH5,23086:down|hsa:10142,AKAP9,10142:up|hsa:26253,CLEC4E,26253:down|hsa:1950,EGF,1950:up|hsa:9388,LIPG,9388:up|hsa:2266,FGG,2266:down|hsa:18,ABAT,18:up|hsa:112755,STX1B,112755:up|hsa:151056,PLB1,151056:up|hsa:637,BID,637:up|hsa:338322,NLRP10,338322:down|hsa:7474,WNT5A,7474:up|hsa:85477,SCIN,85477:down|hsa:8723,SNX4,8723:up|hsa:5366,PMAIP1,5366:up|hsa:154043,CNKSR3,154043:up|hsa:3479,I…	http://amigo.geneontology.org/cgi-bin/amigo/term_details?term=GO:0051050
regulation of muscle system process	Biological Process	GO:0090257	25	214	1438	17840	0.0173852573018081	0.0119955156950673	3.877103e-02	0.6731420	hsa:9150,CTDP1,9150:down|hsa:3728,JUP,3728:down|hsa:3759,KCNJ2,3759:down|hsa:4878,NPPA,4878:up|hsa:5734,PTGER4,5734:up|hsa:7135,TNNI1,7135:up|hsa:154,ADRB2,154:down|hsa:18,ABAT,18:up|hsa:10021,HCN4,10021:up|hsa:3757,KCNH2,3757:up|hsa:487,ATP2A1,487:up|hsa:1113,CHGA,1113:up|hsa:1824,DSC2,1824:up|hsa:9314,KLF4,9314:down|hsa:1829,DSG2,1829:up|hsa:3479,IGF1,3479:down|hsa:6548,SLC9A1,6548:down|hsa:466…	http://amigo.geneontology.org/cgi-bin/amigo/term_details?term=GO:0090257
cell-cell junction organization	Biological Process	GO:0045216	25	214	1438	17840	0.0173852573018081	0.0119955156950673	3.877103e-02	0.6731420	hsa:81607,NECTIN4,81607:down|hsa:57669,EPB41L5,57669:up|hsa:7122,CLDN5,7122:down|hsa:57662,CAMSAP3,57662:down|hsa:26585,GREM1,26585:down|hsa:3728,JUP,3728:down|hsa:5817,PVR,5817:up|hsa:7094,TLN1,7094:up|hsa:2706,GJB2,2706:up|hsa:83605,CCM2,83605:up|hsa:87,ACTN1,87:up|hsa:1009,CDH11,1009:up|hsa:5586,PKN2,5586:up|hsa:5795,PTPRJ,5795:up|hsa:283,ANG,283:down|hsa:6624,FSCN1,6624:up|hsa:143098,MPP7,143…	http://amigo.geneontology.org/cgi-bin/amigo/term_details?term=GO:0045216
embryonic morphogenesis	Biological Process	GO:0048598	57	559	1438	17840	0.0396383866481224	0.0313340807174888	3.878907e-02	0.6731420	hsa:860,RUNX2,860:up|hsa:90,ACVR1,90:up|hsa:51141,INSIG2,51141:up|hsa:659,BMPR2,659:up|hsa:1848,DUSP6,1848:up|hsa:57545,CC2D2A,57545:up|hsa:6662,SOX9,6662:up|hsa:26160,IFT172,26160:up|hsa:2535,FZD2,2535:up|hsa:6491,STIL,6491:up|hsa:3212,HOXB2,3212:down|hsa:7474,WNT5A,7474:up|hsa:3206,HOXA10,3206:down|hsa:7482,WNT2B,7482:down|hsa:2019,EN1,2019:down|hsa:6788,STK3,6788:up|hsa:80184,CEP290,80184:up|h…	http://amigo.geneontology.org/cgi-bin/amigo/term_details?term=GO:0048598
nucleus organization	Biological Process	GO:0006997	17	133	1438	17840	0.0118219749652295	0.00745515695067265	3.879862e-02	0.6731420	hsa:55726,ASUN,55726:up|hsa:26108,PYGO1,26108:up|hsa:891,CCNB1,891:up|hsa:10269,ZMPSTE24,10269:up|hsa:7175,TPR,7175:up|hsa:54700,RRN3,54700:up|hsa:23225,NUP210,23225:up|hsa:6940,ZNF354A,6940:up|hsa:10208,USPL1,10208:up|hsa:28996,HIPK2,28996:up|hsa:57097,PARP11,57097:up|hsa:23198,PSME4,23198:up|hsa:23345,SYNE1,23345:down|hsa:7443,VRK1,7443:up|hsa:9133,CCNB2,9133:up|hsa:9818,NUP58,9818:up|hsa:55161…	http://amigo.geneontology.org/cgi-bin/amigo/term_details?term=GO:0006997
skeletal muscle contraction	Biological Process	GO:0003009	7	40	1438	17840	0.00486787204450626	0.00224215246636771	3.880075e-02	0.6731420	hsa:9456,HOMER1,9456:up|hsa:7135,TNNI1,7135:up|hsa:154,ADRB2,154:down|hsa:3320,HSP90AA1,3320:up|hsa:3759,KCNJ2,3759:down|hsa:487,ATP2A1,487:up|hsa:1134,CHRNA1,1134:up	http://amigo.geneontology.org/cgi-bin/amigo/term_details?term=GO:0003009
negative regulation of mitotic nuclear division	Biological Process	GO:0045839	7	40	1438	17840	0.00486787204450626	0.00224215246636771	3.880075e-02	0.6731420	hsa:7175,TPR,7175:up|hsa:699,BUB1,699:up|hsa:652,BMP4,652:down|hsa:891,CCNB1,891:up|hsa:146691,TOM1L2,146691:down|hsa:546,ATRX,546:up|hsa:1063,CENPF,1063:up	http://amigo.geneontology.org/cgi-bin/amigo/term_details?term=GO:0045839
positive regulation of peptidase activity	Biological Process	GO:0010952	19	153	1438	17840	0.0132127955493741	0.0085762331838565	3.903345e-02	0.6731420	hsa:51065,RPS27L,51065:up|hsa:5721,PSME2,5721:up|hsa:9451,EIF2AK3,9451:up|hsa:8743,TNFSF10,8743:up|hsa:26999,CYFIP2,26999:up|hsa:9141,PDCD5,9141:up|hsa:637,BID,637:up|hsa:5366,PMAIP1,5366:up|hsa:9093,DNAJA3,9093:up|hsa:10550,ARL6IP5,10550:up|hsa:6407,SEMG2,6407:down|hsa:668,FOXL2,668:up|hsa:835,CASP2,835:up|hsa:23198,PSME4,23198:up|hsa:3717,JAK2,3717:up|hsa:841,CASP8,841:up|hsa:112399,EGLN3,11239…	http://amigo.geneontology.org/cgi-bin/amigo/term_details?term=GO:0010952
centrosome organization	Biological Process	GO:0051297	14	104	1438	17840	0.00973574408901252	0.00582959641255605	3.945604e-02	0.6731420	hsa:22995,CEP152,22995:up|hsa:7514,XPO1,7514:up|hsa:675,BRCA2,675:up|hsa:9738,CCP110,9738:up|hsa:4659,PPP1R12A,4659:up|hsa:10806,SDCCAG8,10806:up|hsa:4751,NEK2,4751:down|hsa:4869,NPM1,4869:up|hsa:672,BRCA1,672:up|hsa:899,CCNF,899:up|hsa:6491,STIL,6491:up|hsa:163786,SASS6,163786:up|hsa:9475,ROCK2,9475:up|hsa:54875,CNTLN,54875:up	http://amigo.geneontology.org/cgi-bin/amigo/term_details?term=GO:0051297
cardiac septum development	Biological Process	GO:0003279	12	85	1438	17840	0.00834492350486787	0.00476457399103139	3.949963e-02	0.6731420	hsa:4052,LTBP1,4052:up|hsa:90,ACVR1,90:up|hsa:57167,SALL4,57167:down|hsa:8543,LMO4,8543:up|hsa:199699,DAND5,199699:up|hsa:7468,WHSC1,7468:up|hsa:64220,STRA6,64220:up|hsa:652,BMP4,652:down|hsa:9321,TRIP11,9321:up|hsa:2535,FZD2,2535:up|hsa:57216,VANGL2,57216:up|hsa:7474,WNT5A,7474:up	http://amigo.geneontology.org/cgi-bin/amigo/term_details?term=GO:0003279
oocyte maturation	Biological Process	GO:0001556	5	24	1438	17840	0.00347705146036161	0.00134529147982063	3.955447e-02	0.6731420	hsa:675,BRCA2,675:up|hsa:891,CCNB1,891:up|hsa:283,ANG,283:down|hsa:4882,NPR2,4882:down|hsa:2069,EREG,2069:down	http://amigo.geneontology.org/cgi-bin/amigo/term_details?term=GO:0001556
negative regulation of fatty acid metabolic process	Biological Process	GO:0045922	5	24	1438	17840	0.00347705146036161	0.00134529147982063	3.955447e-02	0.6731420	hsa:33,ACADL,33:down|hsa:51141,INSIG2,51141:up|hsa:672,BRCA1,672:up|hsa:23409,SIRT4,23409:up|hsa:11160,ERLIN2,11160:up	http://amigo.geneontology.org/cgi-bin/amigo/term_details?term=GO:0045922
calcineurin-NFAT signaling cascade	Biological Process	GO:0033173	5	24	1438	17840	0.00347705146036161	0.00134529147982063	3.955447e-02	0.6731420	hsa:6548,SLC9A1,6548:down|hsa:5532,PPP3CB,5532:up|hsa:2065,ERBB3,2065:down|hsa:63928,CHP2,63928:down|hsa:3479,IGF1,3479:down	http://amigo.geneontology.org/cgi-bin/amigo/term_details?term=GO:0033173
histone mRNA metabolic process	Biological Process	GO:0008334	5	24	1438	17840	0.00347705146036161	0.00134529147982063	3.955447e-02	0.6731420	hsa:22916,NCBP2,22916:up|hsa:6635,SNRPE,6635:up|hsa:25888,ZNF473,25888:up|hsa:6741,SSB,6741:up|hsa:6637,SNRPG,6637:up	http://amigo.geneontology.org/cgi-bin/amigo/term_details?term=GO:0008334
cranial nerve morphogenesis	Biological Process	GO:0021602	5	24	1438	17840	0.00347705146036161	0.00134529147982063	3.955447e-02	0.6731420	hsa:401,PHOX2A,401:up|hsa:91584,PLXNA4,91584:down|hsa:2047,EPHB1,2047:down|hsa:3212,HOXB2,3212:down|hsa:1959,EGR2,1959:up	http://amigo.geneontology.org/cgi-bin/amigo/term_details?term=GO:0021602
proximal/distal pattern formation	Biological Process	GO:0009954	6	32	1438	17840	0.00417246175243394	0.00179372197309417	4.013094e-02	0.6731420	hsa:388585,HES5,388585:down|hsa:2019,EN1,2019:down|hsa:26585,GREM1,26585:down|hsa:3205,HOXA9,3205:down|hsa:2735,GLI1,2735:up|hsa:3206,HOXA10,3206:down	http://amigo.geneontology.org/cgi-bin/amigo/term_details?term=GO:0009954
regulation of T cell apoptotic process	Biological Process	GO:0070232	6	32	1438	17840	0.00417246175243394	0.00179372197309417	4.013094e-02	0.6731420	hsa:5133,PDCD1,5133:up|hsa:652,BMP4,652:down|hsa:57864,SLC46A2,57864:down|hsa:3958,LGALS3,3958:down|hsa:3091,HIF1A,3091:up|hsa:7474,WNT5A,7474:up	http://amigo.geneontology.org/cgi-bin/amigo/term_details?term=GO:0070232
protein localization to cytoskeleton	Biological Process	GO:0044380	6	32	1438	17840	0.00417246175243394	0.00179372197309417	4.013094e-02	0.6731420	hsa:11043,MID2,11043:down|hsa:9585,KIF20B,9585:up|hsa:27185,DISC1,27185:down|hsa:64770,CCDC14,64770:up|hsa:6491,STIL,6491:up|hsa:4281,MID1,4281:down	http://amigo.geneontology.org/cgi-bin/amigo/term_details?term=GO:0044380
actin filament-based movement	Biological Process	GO:0030048	15	114	1438	17840	0.0104311543810848	0.00639013452914798	4.033731e-02	0.6731420	hsa:4622,MYH4,4622:down|hsa:57669,EPB41L5,57669:up|hsa:3728,JUP,3728:down|hsa:1824,DSC2,1824:up|hsa:70,ACTC1,70:down|hsa:3759,KCNJ2,3759:down|hsa:1829,DSG2,1829:up|hsa:6548,SLC9A1,6548:down|hsa:7135,TNNI1,7135:up|hsa:5144,PDE4D,5144:down|hsa:6093,ROCK1,6093:up|hsa:3757,KCNH2,3757:up|hsa:7168,TPM1,7168:up|hsa:54874,FNBP1L,54874:up|hsa:6781,STC1,6781:up	http://amigo.geneontology.org/cgi-bin/amigo/term_details?term=GO:0030048
regulation of insulin secretion involved in cellular response to glucose stimulus	Biological Process	GO:0061178	8	49	1438	17840	0.00556328233657858	0.00274663677130045	4.074830e-02	0.6731420	hsa:222546,RFX6,222546:down|hsa:3091,HIF1A,3091:up|hsa:7447,VSNL1,7447:up|hsa:5532,PPP3CB,5532:up|hsa:9378,NRXN1,9378:down|hsa:9572,NR1D1,9572:down|hsa:252983,STXBP4,252983:up|hsa:2822,GPLD1,2822:down	http://amigo.geneontology.org/cgi-bin/amigo/term_details?term=GO:0061178
digestive tract morphogenesis	Biological Process	GO:0048546	8	49	1438	17840	0.00556328233657858	0.00274663677130045	4.074830e-02	0.6731420	hsa:2054,STX2,2054:up|hsa:57669,EPB41L5,57669:up|hsa:3091,HIF1A,3091:up|hsa:64220,STRA6,64220:up|hsa:652,BMP4,652:down|hsa:57216,VANGL2,57216:up|hsa:7474,WNT5A,7474:up|hsa:2735,GLI1,2735:up	http://amigo.geneontology.org/cgi-bin/amigo/term_details?term=GO:0048546
muscle cell apoptotic process	Biological Process	GO:0010657	8	49	1438	17840	0.00556328233657858	0.00274663677130045	4.074830e-02	0.6731420	hsa:57103,TIGAR,57103:up|hsa:23409,SIRT4,23409:up|hsa:3479,IGF1,3479:down|hsa:4040,LRP6,4040:up|hsa:3717,JAK2,3717:up|hsa:3320,HSP90AA1,3320:up|hsa:116,ADCYAP1,116:up|hsa:1029,CDKN2A,1029:up	http://amigo.geneontology.org/cgi-bin/amigo/term_details?term=GO:0010657
negative regulation of platelet-derived growth factor receptor signaling pathway	Biological Process	GO:0010642	3	10	1438	17840	0.00208623087621697	0.000560538116591928	4.081119e-02	0.6731420	hsa:5771,PTPN2,5771:up|hsa:5795,PTPRJ,5795:up|hsa:9678,PHF14,9678:up	http://amigo.geneontology.org/cgi-bin/amigo/term_details?term=GO:0010642
regulation of establishment of protein localization to telomere	Biological Process	GO:0070203	3	10	1438	17840	0.00208623087621697	0.000560538116591928	4.081119e-02	0.6731420	hsa:22948,CCT5,22948:up|hsa:10576,CCT2,10576:up|hsa:6950,TCP1,6950:up	http://amigo.geneontology.org/cgi-bin/amigo/term_details?term=GO:0070203
regulation of mucus secretion	Biological Process	GO:0070255	3	10	1438	17840	0.00208623087621697	0.000560538116591928	4.081119e-02	0.6731420	hsa:9474,ATG5,9474:up|hsa:1535,CYBA,1535:up|hsa:5734,PTGER4,5734:up	http://amigo.geneontology.org/cgi-bin/amigo/term_details?term=GO:0070255
positive regulation of hematopoietic progenitor cell differentiation	Biological Process	GO:1901534	3	10	1438	17840	0.00208623087621697	0.000560538116591928	4.081119e-02	0.6731420	hsa:22890,ZBTB1,22890:up|hsa:2296,FOXC1,2296:up|hsa:85477,SCIN,85477:down	http://amigo.geneontology.org/cgi-bin/amigo/term_details?term=GO:1901534
histone H3-K36 methylation	Biological Process	GO:0010452	3	10	1438	17840	0.00208623087621697	0.000560538116591928	4.081119e-02	0.6731420	hsa:7468,WHSC1,7468:up|hsa:84193,SETD3,84193:up|hsa:55677,IWS1,55677:up	http://amigo.geneontology.org/cgi-bin/amigo/term_details?term=GO:0010452
bone mineralization involved in bone maturation	Biological Process	GO:0035630	3	10	1438	17840	0.00208623087621697	0.000560538116591928	4.081119e-02	0.6731420	hsa:26585,GREM1,26585:down|hsa:359845,FAM101B,359845:up|hsa:3479,IGF1,3479:down	http://amigo.geneontology.org/cgi-bin/amigo/term_details?term=GO:0035630
facial nerve morphogenesis	Biological Process	GO:0021610	3	10	1438	17840	0.00208623087621697	0.000560538116591928	4.081119e-02	0.6731420	hsa:91584,PLXNA4,91584:down|hsa:3212,HOXB2,3212:down|hsa:1959,EGR2,1959:up	http://amigo.geneontology.org/cgi-bin/amigo/term_details?term=GO:0021610
resolution of meiotic recombination intermediates	Biological Process	GO:0000712	3	10	1438	17840	0.00208623087621697	0.000560538116591928	4.081119e-02	0.6731420	hsa:7153,TOP2A,7153:up|hsa:7155,TOP2B,7155:up|hsa:378708,APITD1,378708:up	http://amigo.geneontology.org/cgi-bin/amigo/term_details?term=GO:0000712
protein folding in endoplasmic reticulum	Biological Process	GO:0034975	3	10	1438	17840	0.00208623087621697	0.000560538116591928	4.081119e-02	0.6731420	hsa:811,CALR,811:up|hsa:54431,DNAJC10,54431:up|hsa:7184,HSP90B1,7184:up	http://amigo.geneontology.org/cgi-bin/amigo/term_details?term=GO:0034975
DNA unwinding involved in DNA replication	Biological Process	GO:0006268	3	10	1438	17840	0.00208623087621697	0.000560538116591928	4.081119e-02	0.6731420	hsa:7153,TOP2A,7153:up|hsa:7155,TOP2B,7155:up|hsa:4175,MCM6,4175:up	http://amigo.geneontology.org/cgi-bin/amigo/term_details?term=GO:0006268
facial nerve development	Biological Process	GO:0021561	3	10	1438	17840	0.00208623087621697	0.000560538116591928	4.081119e-02	0.6731420	hsa:91584,PLXNA4,91584:down|hsa:3212,HOXB2,3212:down|hsa:1959,EGR2,1959:up	http://amigo.geneontology.org/cgi-bin/amigo/term_details?term=GO:0021561
sister chromatid cohesion	Biological Process	GO:0007062	16	124	1438	17840	0.0111265646731572	0.00695067264573991	4.091263e-02	0.6731420	hsa:114799,ESCO1,114799:up|hsa:546,ATRX,546:up|hsa:1063,CENPF,1063:up|hsa:10735,STAG2,10735:up|hsa:10403,NDC80,10403:up|hsa:6232,RPS27,6232:down|hsa:64105,CENPK,64105:up|hsa:55055,ZWILCH,55055:up|hsa:7514,XPO1,7514:up|hsa:151246,SGO2,151246:up|hsa:113130,CDCA5,113130:up|hsa:699,BUB1,699:up|hsa:55294,FBXW7,55294:down|hsa:1062,CENPE,1062:up|hsa:378708,APITD1,378708:up|hsa:55719,SLF2,55719:up	http://amigo.geneontology.org/cgi-bin/amigo/term_details?term=GO:0007062
positive regulation of intracellular protein transport	Biological Process	GO:0090316	29	257	1438	17840	0.0201668984700974	0.0144058295964126	4.106259e-02	0.6731420	hsa:26585,GREM1,26585:down|hsa:3728,JUP,3728:down|hsa:2181,ACSL3,2181:up|hsa:1950,EGF,1950:up|hsa:54069,MIS18A,54069:up|hsa:3843,IPO5,3843:up|hsa:55531,ELMOD1,55531:down|hsa:9585,KIF20B,9585:up|hsa:5532,PPP3CB,5532:up|hsa:672,BRCA1,672:up|hsa:9141,PDCD5,9141:up|hsa:7097,TLR2,7097:up|hsa:7175,TPR,7175:up|hsa:163882,CNST,163882:down|hsa:3745,KCNB1,3745:down|hsa:10913,EDAR,10913:up|hsa:80184,CEP290,…	http://amigo.geneontology.org/cgi-bin/amigo/term_details?term=GO:0090316
cardiac chamber development	Biological Process	GO:0003205	18	144	1438	17840	0.0125173852573018	0.00807174887892377	4.135387e-02	0.6731420	hsa:4052,LTBP1,4052:up|hsa:90,ACVR1,90:up|hsa:57167,SALL4,57167:down|hsa:157378,TMEM65,157378:up|hsa:7468,WHSC1,7468:up|hsa:7135,TNNI1,7135:up|hsa:9321,TRIP11,9321:up|hsa:2535,FZD2,2535:up|hsa:57216,VANGL2,57216:up|hsa:2296,FOXC1,2296:up|hsa:7474,WNT5A,7474:up|hsa:3091,HIF1A,3091:up|hsa:8543,LMO4,8543:up|hsa:199699,DAND5,199699:up|hsa:3776,KCNK2,3776:up|hsa:64220,STRA6,64220:up|hsa:652,BMP4,652:d…	http://amigo.geneontology.org/cgi-bin/amigo/term_details?term=GO:0003205
gonad development	Biological Process	GO:0008406	25	216	1438	17840	0.0173852573018081	0.0121076233183857	4.259428e-02	0.6731420	hsa:546,ATRX,546:up|hsa:4142,MAS1,4142:down|hsa:259266,ASPM,259266:up|hsa:638,BIK,638:up|hsa:6662,SOX9,6662:up|hsa:5734,PTGER4,5734:up|hsa:51742,ARID4B,51742:up|hsa:116,ADCYAP1,116:up|hsa:2175,FANCA,2175:up|hsa:2296,FOXC1,2296:up|hsa:7474,WNT5A,7474:up|hsa:7482,WNT2B,7482:down|hsa:3206,HOXA10,3206:down|hsa:675,BRCA2,675:up|hsa:56956,LHX9,56956:up|hsa:283,ANG,283:down|hsa:3205,HOXA9,3205:down|hsa:…	http://amigo.geneontology.org/cgi-bin/amigo/term_details?term=GO:0008406
negative regulation of stem cell proliferation	Biological Process	GO:2000647	4	17	1438	17840	0.00278164116828929	0.000952914798206278	4.284940e-02	0.6731420	hsa:56998,CTNNBIP1,56998:down|hsa:652,BMP4,652:down|hsa:9678,PHF14,9678:up|hsa:7474,WNT5A,7474:up	http://amigo.geneontology.org/cgi-bin/amigo/term_details?term=GO:2000647
glucocorticoid receptor signaling pathway	Biological Process	GO:0042921	4	17	1438	17840	0.00278164116828929	0.000952914798206278	4.284940e-02	0.6731420	hsa:811,CALR,811:up|hsa:1408,CRY2,1408:down|hsa:55885,LMO3,55885:up|hsa:5187,PER1,5187:down	http://amigo.geneontology.org/cgi-bin/amigo/term_details?term=GO:0042921
intestinal epithelial cell differentiation	Biological Process	GO:0060575	4	17	1438	17840	0.00278164116828929	0.000952914798206278	4.284940e-02	0.6731420	hsa:688,KLF5,688:down|hsa:57103,TIGAR,57103:up|hsa:3091,HIF1A,3091:up|hsa:3202,HOXA5,3202:down	http://amigo.geneontology.org/cgi-bin/amigo/term_details?term=GO:0060575
regulation of calcineurin-NFAT signaling cascade	Biological Process	GO:0070884	4	17	1438	17840	0.00278164116828929	0.000952914798206278	4.284940e-02	0.6731420	hsa:6548,SLC9A1,6548:down|hsa:2065,ERBB3,2065:down|hsa:63928,CHP2,63928:down|hsa:3479,IGF1,3479:down	http://amigo.geneontology.org/cgi-bin/amigo/term_details?term=GO:0070884
segment specification	Biological Process	GO:0007379	4	17	1438	17840	0.00278164116828929	0.000952914798206278	4.284940e-02	0.6731420	hsa:388585,HES5,388585:down|hsa:4222,MEOX1,4222:up|hsa:648,BMI1,648:up|hsa:23242,COBL,23242:down	http://amigo.geneontology.org/cgi-bin/amigo/term_details?term=GO:0007379
regulation of DNA methylation	Biological Process	GO:0044030	4	17	1438	17840	0.00278164116828929	0.000952914798206278	4.284940e-02	0.6731420	hsa:672,BRCA1,672:up|hsa:54737,MPHOSPH8,54737:up|hsa:1786,DNMT1,1786:up|hsa:54069,MIS18A,54069:up	http://amigo.geneontology.org/cgi-bin/amigo/term_details?term=GO:0044030
thymocyte apoptotic process	Biological Process	GO:0070242	4	17	1438	17840	0.00278164116828929	0.000952914798206278	4.284940e-02	0.6731420	hsa:652,BMP4,652:down|hsa:10018,BCL2L11,10018:up|hsa:3091,HIF1A,3091:up|hsa:7474,WNT5A,7474:up	http://amigo.geneontology.org/cgi-bin/amigo/term_details?term=GO:0070242
regulation of sister chromatid cohesion	Biological Process	GO:0007063	4	17	1438	17840	0.00278164116828929	0.000952914798206278	4.284940e-02	0.6731420	hsa:699,BUB1,699:up|hsa:546,ATRX,546:up|hsa:55719,SLF2,55719:up|hsa:113130,CDCA5,113130:up	http://amigo.geneontology.org/cgi-bin/amigo/term_details?term=GO:0007063
male meiosis I	Biological Process	GO:0007141	4	17	1438	17840	0.00278164116828929	0.000952914798206278	4.284940e-02	0.6731420	hsa:54456,MOV10L1,54456:up|hsa:675,BRCA2,675:up|hsa:676,BRDT,676:down|hsa:3306,HSPA2,3306:down	http://amigo.geneontology.org/cgi-bin/amigo/term_details?term=GO:0007141
T cell homeostasis	Biological Process	GO:0043029	7	41	1438	17840	0.00486787204450626	0.00229820627802691	4.365949e-02	0.6731420	hsa:5532,PPP3CB,5532:up|hsa:3559,IL2RA,3559:up|hsa:57864,SLC46A2,57864:down|hsa:10018,BCL2L11,10018:up|hsa:5366,PMAIP1,5366:up|hsa:9133,CCNB2,9133:up|hsa:9093,DNAJA3,9093:up	http://amigo.geneontology.org/cgi-bin/amigo/term_details?term=GO:0043029
actin filament organization	Biological Process	GO:0007015	34	312	1438	17840	0.023643949930459	0.0174887892376682	4.433639e-02	0.6731420	hsa:6712,SPTBN2,6712:down|hsa:10602,CDC42EP3,10602:up|hsa:3636,INPPL1,3636:up|hsa:7184,HSP90B1,7184:up|hsa:70,ACTC1,70:down|hsa:8936,WASF1,8936:up|hsa:25802,LMOD1,25802:down|hsa:90167,FRMD7,90167:down|hsa:359845,FAM101B,359845:up|hsa:85477,SCIN,85477:down|hsa:5756,TWF1,5756:up|hsa:57026,PDXP,57026:up|hsa:283,ANG,283:down|hsa:10529,NEBL,10529:down|hsa:9168,TMSB10,9168:up|hsa:5584,PRKCI,5584:up|hsa…	http://amigo.geneontology.org/cgi-bin/amigo/term_details?term=GO:0007015
lymphocyte apoptotic process	Biological Process	GO:0070227	10	68	1438	17840	0.00695410292072323	0.00381165919282511	4.503671e-02	0.6731420	hsa:5133,PDCD1,5133:up|hsa:57864,SLC46A2,57864:down|hsa:3958,LGALS3,3958:down|hsa:3091,HIF1A,3091:up|hsa:9093,DNAJA3,9093:up|hsa:27242,TNFRSF21,27242:up|hsa:3559,IL2RA,3559:up|hsa:652,BMP4,652:down|hsa:10018,BCL2L11,10018:up|hsa:7474,WNT5A,7474:up	http://amigo.geneontology.org/cgi-bin/amigo/term_details?term=GO:0070227
musculoskeletal movement	Biological Process	GO:0050881	8	50	1438	17840	0.00556328233657858	0.00280269058295964	4.522081e-02	0.6731420	hsa:9456,HOMER1,9456:up|hsa:3759,KCNJ2,3759:down|hsa:28996,HIPK2,28996:up|hsa:3320,HSP90AA1,3320:up|hsa:154,ADRB2,154:down|hsa:7135,TNNI1,7135:up|hsa:1134,CHRNA1,1134:up|hsa:487,ATP2A1,487:up	http://amigo.geneontology.org/cgi-bin/amigo/term_details?term=GO:0050881
multicellular organismal movement	Biological Process	GO:0050879	8	50	1438	17840	0.00556328233657858	0.00280269058295964	4.522081e-02	0.6731420	hsa:9456,HOMER1,9456:up|hsa:3759,KCNJ2,3759:down|hsa:28996,HIPK2,28996:up|hsa:3320,HSP90AA1,3320:up|hsa:154,ADRB2,154:down|hsa:7135,TNNI1,7135:up|hsa:1134,CHRNA1,1134:up|hsa:487,ATP2A1,487:up	http://amigo.geneontology.org/cgi-bin/amigo/term_details?term=GO:0050879
sex differentiation	Biological Process	GO:0007548	30	270	1438	17840	0.0208623087621697	0.0151345291479821	4.545468e-02	0.6731420	hsa:546,ATRX,546:up|hsa:4142,MAS1,4142:down|hsa:259266,ASPM,259266:up|hsa:2706,GJB2,2706:up|hsa:638,BIK,638:up|hsa:1602,DACH1,1602:up|hsa:6662,SOX9,6662:up|hsa:5734,PTGER4,5734:up|hsa:51742,ARID4B,51742:up|hsa:116,ADCYAP1,116:up|hsa:2175,FANCA,2175:up|hsa:2296,FOXC1,2296:up|hsa:7474,WNT5A,7474:up|hsa:3206,HOXA10,3206:down|hsa:7482,WNT2B,7482:down|hsa:675,BRCA2,675:up|hsa:56956,LHX9,56956:up|hsa:2…	http://amigo.geneontology.org/cgi-bin/amigo/term_details?term=GO:0007548
negative regulation of protein polymerization	Biological Process	GO:0032272	9	59	1438	17840	0.0062586926286509	0.00330717488789238	4.553124e-02	0.6731420	hsa:5756,TWF1,5756:up|hsa:29765,TMOD4,29765:up|hsa:6712,SPTBN2,6712:down|hsa:10677,AVIL,10677:up|hsa:25802,LMOD1,25802:down|hsa:830,CAPZA2,830:up|hsa:3925,STMN1,3925:up|hsa:27124,INPP5J,27124:down|hsa:85477,SCIN,85477:down	http://amigo.geneontology.org/cgi-bin/amigo/term_details?term=GO:0032272
establishment or maintenance of bipolar cell polarity	Biological Process	GO:0061245	6	33	1438	17840	0.00417246175243394	0.00184977578475336	4.582958e-02	0.6731420	hsa:9355,LHX2,9355:up|hsa:57216,VANGL2,57216:up|hsa:6624,FSCN1,6624:up|hsa:378,ARF4,378:up|hsa:5584,PRKCI,5584:up|hsa:7474,WNT5A,7474:up	http://amigo.geneontology.org/cgi-bin/amigo/term_details?term=GO:0061245
dopaminergic neuron differentiation	Biological Process	GO:0071542	6	33	1438	17840	0.00417246175243394	0.00184977578475336	4.582958e-02	0.6731420	hsa:4040,LRP6,4040:up|hsa:401,PHOX2A,401:up|hsa:2277,FIGF,2277:up|hsa:2019,EN1,2019:down|hsa:3091,HIF1A,3091:up|hsa:7474,WNT5A,7474:up	http://amigo.geneontology.org/cgi-bin/amigo/term_details?term=GO:0071542
establishment or maintenance of apical/basal cell polarity	Biological Process	GO:0035088	6	33	1438	17840	0.00417246175243394	0.00184977578475336	4.582958e-02	0.6731420	hsa:9355,LHX2,9355:up|hsa:57216,VANGL2,57216:up|hsa:6624,FSCN1,6624:up|hsa:378,ARF4,378:up|hsa:5584,PRKCI,5584:up|hsa:7474,WNT5A,7474:up	http://amigo.geneontology.org/cgi-bin/amigo/term_details?term=GO:0035088
actin filament bundle assembly	Biological Process	GO:0051017	15	116	1438	17840	0.0104311543810848	0.00650224215246637	4.594279e-02	0.6731420	hsa:57026,PDXP,57026:up|hsa:84501,SPIRE2,84501:up|hsa:7184,HSP90B1,7184:up|hsa:6624,FSCN1,6624:up|hsa:5734,PTGER4,5734:up|hsa:7984,ARHGEF5,7984:down|hsa:6548,SLC9A1,6548:down|hsa:87,ACTN1,87:up|hsa:83715,ESPN,83715:down|hsa:90167,FRMD7,90167:down|hsa:6093,ROCK1,6093:up|hsa:7168,TPM1,7168:up|hsa:154796,AMOT,154796:down|hsa:9475,ROCK2,9475:up|hsa:11346,SYNPO,11346:up	http://amigo.geneontology.org/cgi-bin/amigo/term_details?term=GO:0051017
activation of cysteine-type endopeptidase activity involved in apoptotic process	Biological Process	GO:0006919	12	87	1438	17840	0.00834492350486787	0.00487668161434978	4.602851e-02	0.6731420	hsa:51065,RPS27L,51065:up|hsa:5366,PMAIP1,5366:up|hsa:9093,DNAJA3,9093:up|hsa:9451,EIF2AK3,9451:up|hsa:835,CASP2,835:up|hsa:8743,TNFSF10,8743:up|hsa:3717,JAK2,3717:up|hsa:10018,BCL2L11,10018:up|hsa:112399,EGLN3,112399:down|hsa:841,CASP8,841:up|hsa:637,BID,637:up|hsa:9994,CASP8AP2,9994:up	http://amigo.geneontology.org/cgi-bin/amigo/term_details?term=GO:0006919
regulation of protein complex assembly	Biological Process	GO:0043254	39	367	1438	17840	0.0271210013908206	0.0205717488789238	4.613327e-02	0.6731420	hsa:6712,SPTBN2,6712:down|hsa:10602,CDC42EP3,10602:up|hsa:8936,WASF1,8936:up|hsa:29091,STXBP6,29091:down|hsa:638,BIK,638:up|hsa:25802,LMOD1,25802:down|hsa:112755,STX1B,112755:up|hsa:3925,STMN1,3925:up|hsa:637,BID,637:up|hsa:85477,SCIN,85477:down|hsa:5756,TWF1,5756:up|hsa:56998,CTNNBIP1,56998:down|hsa:54700,RRN3,54700:up|hsa:5366,PMAIP1,5366:up|hsa:8543,LMO4,8543:up|hsa:7984,ARHGEF5,7984:down|hsa:…	http://amigo.geneontology.org/cgi-bin/amigo/term_details?term=GO:0043254
chondrocyte development	Biological Process	GO:0002063	5	25	1438	17840	0.00347705146036161	0.00140134529147982	4.627618e-02	0.6731420	hsa:860,RUNX2,860:up|hsa:659,BMPR2,659:up|hsa:359845,FAM101B,359845:up|hsa:6662,SOX9,6662:up|hsa:9451,EIF2AK3,9451:up	http://amigo.geneontology.org/cgi-bin/amigo/term_details?term=GO:0002063
positive regulation of insulin secretion involved in cellular response to glucose stimulus	Biological Process	GO:0035774	5	25	1438	17840	0.00347705146036161	0.00140134529147982	4.627618e-02	0.6731420	hsa:5532,PPP3CB,5532:up|hsa:222546,RFX6,222546:down|hsa:3091,HIF1A,3091:up|hsa:7447,VSNL1,7447:up|hsa:2822,GPLD1,2822:down	http://amigo.geneontology.org/cgi-bin/amigo/term_details?term=GO:0035774
homophilic cell adhesion via plasma membrane adhesion molecules	Biological Process	GO:0007156	18	146	1438	17840	0.0125173852573018	0.00818385650224215	4.636203e-02	0.6731420	hsa:81607,NECTIN4,81607:down|hsa:57717,PCDHB16,57717:up|hsa:1825,DSC3,1825:down|hsa:9746,CLSTN3,9746:up|hsa:5817,PVR,5817:up|hsa:10205,MPZL2,10205:up|hsa:56133,PCDHB2,56133:up|hsa:4345,CD200,4345:up|hsa:1009,CDH11,1009:up|hsa:10666,CD226,10666:up|hsa:92211,CDHR1,92211:down|hsa:56097,PCDHGC5,56097:up|hsa:1824,DSC2,1824:up|hsa:26167,PCDHB5,26167:up|hsa:56127,PCDHB9,56127:up|hsa:1829,DSG2,1829:up|hs…	http://amigo.geneontology.org/cgi-bin/amigo/term_details?term=GO:0007156
maintenance of protein location	Biological Process	GO:0045185	17	136	1438	17840	0.0118219749652295	0.00762331838565022	4.643996e-02	0.6731420	hsa:4052,LTBP1,4052:up|hsa:90417,KNSTRN,90417:up|hsa:11116,FGFR1OP,11116:up|hsa:9648,GCC2,9648:up|hsa:57662,CAMSAP3,57662:down|hsa:3728,JUP,3728:down|hsa:7094,TLN1,7094:up|hsa:57120,GOPC,57120:up|hsa:10403,NDC80,10403:up|hsa:891,CCNB1,891:up|hsa:85477,SCIN,85477:down|hsa:5756,TWF1,5756:up|hsa:675,BRCA2,675:up|hsa:4751,NEK2,4751:down|hsa:81573,ANKRD13C,81573:up|hsa:23345,SYNE1,23345:down|hsa:1062,…	http://amigo.geneontology.org/cgi-bin/amigo/term_details?term=GO:0045185
DNA conformation change	Biological Process	GO:0071103	29	260	1438	17840	0.0201668984700974	0.0145739910313901	4.657729e-02	0.6731420	hsa:9837,GINS1,9837:up|hsa:1643,DDB2,1643:down|hsa:4175,MCM6,4175:up|hsa:546,ATRX,546:up|hsa:6662,SOX9,6662:up|hsa:54069,MIS18A,54069:up|hsa:4869,NPM1,4869:up|hsa:7155,TOP2B,7155:up|hsa:64105,CENPK,64105:up|hsa:51773,RSF1,51773:up|hsa:10592,SMC2,10592:up|hsa:891,CCNB1,891:up|hsa:641,BLM,641:up|hsa:55320,MIS18BP1,55320:up|hsa:440689,HIST2H2BF,440689:up|hsa:7153,TOP2A,7153:up|hsa:3070,HELLS,3070:up…	http://amigo.geneontology.org/cgi-bin/amigo/term_details?term=GO:0071103
circulatory system development	Biological Process	GO:0072359	88	917	1438	17840	0.0611961057023644	0.0514013452914798	4.790013e-02	0.6731420	hsa:7122,CLDN5,7122:down|hsa:4052,LTBP1,4052:up|hsa:90,ACVR1,90:up|hsa:1848,DUSP6,1848:up|hsa:79812,MMRN2,79812:down|hsa:57545,CC2D2A,57545:up|hsa:1950,EGF,1950:up|hsa:9451,EIF2AK3,9451:up|hsa:26160,IFT172,26160:up|hsa:7135,TNNI1,7135:up|hsa:891,CCNB1,891:up|hsa:2535,FZD2,2535:up|hsa:6491,STIL,6491:up|hsa:6095,RORA,6095:down|hsa:7474,WNT5A,7474:up|hsa:8543,LMO4,8543:up|hsa:1232,CCR3,1232:down|hsa…	http://amigo.geneontology.org/cgi-bin/amigo/term_details?term=GO:0072359
cardiovascular system development	Biological Process	GO:0072358	88	917	1438	17840	0.0611961057023644	0.0514013452914798	4.790013e-02	0.6731420	hsa:7122,CLDN5,7122:down|hsa:4052,LTBP1,4052:up|hsa:90,ACVR1,90:up|hsa:1848,DUSP6,1848:up|hsa:79812,MMRN2,79812:down|hsa:57545,CC2D2A,57545:up|hsa:1950,EGF,1950:up|hsa:9451,EIF2AK3,9451:up|hsa:26160,IFT172,26160:up|hsa:7135,TNNI1,7135:up|hsa:891,CCNB1,891:up|hsa:2535,FZD2,2535:up|hsa:6491,STIL,6491:up|hsa:6095,RORA,6095:down|hsa:7474,WNT5A,7474:up|hsa:8543,LMO4,8543:up|hsa:1232,CCR3,1232:down|hsa…	http://amigo.geneontology.org/cgi-bin/amigo/term_details?term=GO:0072358
smoothened signaling pathway	Biological Process	GO:0007224	15	117	1438	17840	0.0104311543810848	0.00655829596412556	4.894190e-02	0.6731420	hsa:860,RUNX2,860:up|hsa:84662,GLIS2,84662:up|hsa:139411,PTCHD1,139411:down|hsa:28996,HIPK2,28996:up|hsa:57545,CC2D2A,57545:up|hsa:200894,ARL13B,200894:up|hsa:26160,IFT172,26160:up|hsa:388585,HES5,388585:down|hsa:27148,STK36,27148:up|hsa:652,BMP4,652:down|hsa:79659,DYNC2H1,79659:up|hsa:6491,STIL,6491:up|hsa:6738,TROVE2,6738:up|hsa:6095,RORA,6095:down|hsa:2735,GLI1,2735:up	http://amigo.geneontology.org/cgi-bin/amigo/term_details?term=GO:0007224
DNA-dependent DNA replication	Biological Process	GO:0006261	16	127	1438	17840	0.0111265646731572	0.00711883408071749	4.919841e-02	0.6731420	hsa:9134,CCNE2,9134:up|hsa:9837,GINS1,9837:up|hsa:4175,MCM6,4175:up|hsa:546,ATRX,546:up|hsa:54962,TIPIN,54962:up|hsa:1602,DACH1,1602:up|hsa:10735,STAG2,10735:up|hsa:7155,TOP2B,7155:up|hsa:641,BLM,641:up|hsa:7153,TOP2A,7153:up|hsa:675,BRCA2,675:up|hsa:9093,DNAJA3,9093:up|hsa:259282,BOD1L1,259282:up|hsa:55294,FBXW7,55294:down|hsa:652,BMP4,652:down|hsa:378708,APITD1,378708:up	http://amigo.geneontology.org/cgi-bin/amigo/term_details?term=GO:0006261
synapse assembly	Biological Process	GO:0007416	17	137	1438	17840	0.0118219749652295	0.00767937219730942	4.920944e-02	0.6731420	hsa:57717,PCDHB16,57717:up|hsa:6712,SPTBN2,6712:down|hsa:9746,CLSTN3,9746:up|hsa:64284,RAB17,64284:up|hsa:23768,FLRT2,23768:up|hsa:56133,PCDHB2,56133:up|hsa:2047,EPHB1,2047:down|hsa:9378,NRXN1,9378:down|hsa:8927,BSN,8927:up|hsa:7474,WNT5A,7474:up|hsa:26167,PCDHB5,26167:up|hsa:23316,CUX2,23316:up|hsa:56127,PCDHB9,56127:up|hsa:84623,KIRREL3,84623:up|hsa:8292,COLQ,8292:up|hsa:22829,NLGN4Y,22829:up|h…	http://amigo.geneontology.org/cgi-bin/amigo/term_details?term=GO:0007416
protein localization to chromosome	Biological Process	GO:0034502	9	60	1438	17840	0.0062586926286509	0.00336322869955157	4.989823e-02	0.6731420	hsa:22948,CCT5,22948:up|hsa:10576,CCT2,10576:up|hsa:6950,TCP1,6950:up|hsa:675,BRCA2,675:up|hsa:546,ATRX,546:up|hsa:113130,CDCA5,113130:up|hsa:157570,ESCO2,157570:up|hsa:545,ATR,545:up|hsa:55719,SLF2,55719:up	http://amigo.geneontology.org/cgi-bin/amigo/term_details?term=GO:0034502
cellular response to abiotic stimulus	Biological Process	GO:0071214	31	283	1438	17840	0.021557719054242	0.0158632286995516	4.992461e-02	0.6731420	hsa:1643,DDB2,1643:down|hsa:3759,KCNJ2,3759:down|hsa:1410,CRYAB,1410:down|hsa:1508,CTSB,1508:up|hsa:4878,NPPA,4878:up|hsa:6662,SOX9,6662:up|hsa:5734,PTGER4,5734:up|hsa:10974,ADIRF,10974:down|hsa:57646,USP28,57646:up|hsa:6247,RS1,6247:down|hsa:9990,SLC12A6,9990:up|hsa:641,BLM,641:up|hsa:2822,GPLD1,2822:down|hsa:6539,SLC6A12,6539:up|hsa:1535,CYBA,1535:up|hsa:7158,TP53BP1,7158:up|hsa:3091,HIF1A,3091…	http://amigo.geneontology.org/cgi-bin/amigo/term_details?term=GO:0071214
regulation of cellular localization	Biological Process	GO:0060341	117	1254	1438	17840	0.0813630041724618	0.0702914798206278	5.069429e-02	0.6731420	hsa:23086,EXPH5,23086:down|hsa:26253,CLEC4E,26253:down|hsa:81555,YIPF5,81555:up|hsa:1410,CRYAB,1410:down|hsa:27242,TNFRSF21,27242:up|hsa:1950,EGF,1950:up|hsa:9451,EIF2AK3,9451:up|hsa:2266,FGG,2266:down|hsa:18,ABAT,18:up|hsa:891,CCNB1,891:up|hsa:112755,STX1B,112755:up|hsa:9378,NRXN1,9378:down|hsa:151056,PLB1,151056:up|hsa:637,BID,637:up|hsa:338322,NLRP10,338322:down|hsa:7474,WNT5A,7474:up|hsa:2294…	http://amigo.geneontology.org/cgi-bin/amigo/term_details?term=GO:0060341
dorsal/ventral pattern formation	Biological Process	GO:0009953	13	98	1438	17840	0.0090403337969402	0.0054932735426009	5.083747e-02	0.6731420	hsa:2019,EN1,2019:down|hsa:26585,GREM1,26585:down|hsa:90,ACVR1,90:up|hsa:1848,DUSP6,1848:up|hsa:9355,LHX2,9355:up|hsa:200894,ARL13B,200894:up|hsa:1950,EGF,1950:up|hsa:4040,LRP6,4040:up|hsa:26160,IFT172,26160:up|hsa:652,BMP4,652:down|hsa:79659,DYNC2H1,79659:up|hsa:3212,HOXB2,3212:down|hsa:2735,GLI1,2735:up	http://amigo.geneontology.org/cgi-bin/amigo/term_details?term=GO:0009953
regulation of macromolecule biosynthetic process	Biological Process	GO:0010556	340	3906	1438	17840	0.23643949930459	0.218946188340807	5.141314e-02	0.6731420	hsa:90,ACVR1,90:up|hsa:1950,EGF,1950:up|hsa:4869,NPM1,4869:up|hsa:65056,GPBP1,65056:up|hsa:6596,HLTF,6596:up|hsa:170622,COMMD6,170622:up|hsa:26053,AUTS2,26053:up|hsa:56924,PAK6,56924:down|hsa:7752,ZNF200,7752:up|hsa:3479,IGF1,3479:down|hsa:7707,ZNF148,7707:up|hsa:1408,CRY2,1408:down|hsa:92552,ATXN3L,92552:down|hsa:1786,DNMT1,1786:up|hsa:27332,ZNF638,27332:up|hsa:6787,NEK4,6787:up|hsa:222546,RFX6,…	http://amigo.geneontology.org/cgi-bin/amigo/term_details?term=GO:0010556
muscle structure development	Biological Process	GO:0061061	56	558	1438	17840	0.0389429763560501	0.0312780269058296	5.153035e-02	0.6731420	hsa:6938,TCF12,6938:up|hsa:9150,CTDP1,9150:down|hsa:90,ACVR1,90:up|hsa:70,ACTC1,70:down|hsa:1410,CRYAB,1410:down|hsa:1508,CTSB,1508:up|hsa:1063,CENPF,1063:up|hsa:6662,SOX9,6662:up|hsa:25802,LMOD1,25802:down|hsa:7135,TNNI1,7135:up|hsa:891,CCNB1,891:up|hsa:2535,FZD2,2535:up|hsa:6095,RORA,6095:down|hsa:84525,HOPX,84525:down|hsa:7474,WNT5A,7474:up|hsa:811,CALR,811:up|hsa:9456,HOMER1,9456:up|hsa:23363…	http://amigo.geneontology.org/cgi-bin/amigo/term_details?term=GO:0061061
tyrosine phosphorylation of Stat1 protein	Biological Process	GO:0042508	4	18	1438	17840	0.00278164116828929	0.00100896860986547	5.169026e-02	0.6731420	hsa:5771,PTPN2,5771:up|hsa:3717,JAK2,3717:up|hsa:8651,SOCS1,8651:up|hsa:5008,OSM,5008:up	http://amigo.geneontology.org/cgi-bin/amigo/term_details?term=GO:0042508
parasympathetic nervous system development	Biological Process	GO:0048486	4	18	1438	17840	0.00278164116828929	0.00100896860986547	5.169026e-02	0.6731420	hsa:401,PHOX2A,401:up|hsa:91584,PLXNA4,91584:down|hsa:3212,HOXB2,3212:down|hsa:1959,EGR2,1959:up	http://amigo.geneontology.org/cgi-bin/amigo/term_details?term=GO:0048486
histone H4-K16 acetylation	Biological Process	GO:0043984	4	18	1438	17840	0.00278164116828929	0.00100896860986547	5.169026e-02	0.6731420	hsa:10943,MSL3,10943:up|hsa:672,BRCA1,672:up|hsa:9474,ATG5,9474:up|hsa:26053,AUTS2,26053:up	http://amigo.geneontology.org/cgi-bin/amigo/term_details?term=GO:0043984
negative regulation of bone mineralization	Biological Process	GO:0030502	4	18	1438	17840	0.00278164116828929	0.00100896860986547	5.169026e-02	0.6731420	hsa:26585,GREM1,26585:down|hsa:3091,HIF1A,3091:up|hsa:359845,FAM101B,359845:up|hsa:6662,SOX9,6662:up	http://amigo.geneontology.org/cgi-bin/amigo/term_details?term=GO:0030502
negative regulation of extrinsic apoptotic signaling pathway via death domain receptors	Biological Process	GO:1902042	6	34	1438	17840	0.00417246175243394	0.00190582959641256	5.200573e-02	0.6731420	hsa:8743,TNFSF10,8743:up|hsa:5054,SERPINE1,5054:up|hsa:2244,FGB,2244:down|hsa:2266,FGG,2266:down|hsa:672,BRCA1,672:up|hsa:841,CASP8,841:up	http://amigo.geneontology.org/cgi-bin/amigo/term_details?term=GO:1902042
positive regulation of cysteine-type endopeptidase activity involved in apoptotic process	Biological Process	GO:0043280	15	118	1438	17840	0.0104311543810848	0.00661434977578475	5.207513e-02	0.6731420	hsa:51065,RPS27L,51065:up|hsa:5366,PMAIP1,5366:up|hsa:9093,DNAJA3,9093:up|hsa:10550,ARL6IP5,10550:up|hsa:668,FOXL2,668:up|hsa:9451,EIF2AK3,9451:up|hsa:835,CASP2,835:up|hsa:8743,TNFSF10,8743:up|hsa:3717,JAK2,3717:up|hsa:10018,BCL2L11,10018:up|hsa:112399,EGLN3,112399:down|hsa:841,CASP8,841:up|hsa:9141,PDCD5,9141:up|hsa:637,BID,637:up|hsa:9994,CASP8AP2,9994:up	http://amigo.geneontology.org/cgi-bin/amigo/term_details?term=GO:0043280
positive regulation of cysteine-type endopeptidase activity	Biological Process	GO:2001056	16	128	1438	17840	0.0111265646731572	0.00717488789237668	5.220477e-02	0.6731420	hsa:51065,RPS27L,51065:up|hsa:9451,EIF2AK3,9451:up|hsa:8743,TNFSF10,8743:up|hsa:26999,CYFIP2,26999:up|hsa:9141,PDCD5,9141:up|hsa:637,BID,637:up|hsa:5366,PMAIP1,5366:up|hsa:10550,ARL6IP5,10550:up|hsa:9093,DNAJA3,9093:up|hsa:835,CASP2,835:up|hsa:668,FOXL2,668:up|hsa:3717,JAK2,3717:up|hsa:841,CASP8,841:up|hsa:112399,EGLN3,112399:down|hsa:10018,BCL2L11,10018:up|hsa:9994,CASP8AP2,9994:up	http://amigo.geneontology.org/cgi-bin/amigo/term_details?term=GO:2001056
macromolecular complex assembly	Biological Process	GO:0065003	151	1653	1438	17840	0.105006954102921	0.0926569506726457	5.259835e-02	0.6731420	hsa:6712,SPTBN2,6712:down|hsa:8936,WASF1,8936:up|hsa:10157,AASS,10157:up|hsa:1410,CRYAB,1410:down|hsa:546,ATRX,546:up|hsa:7381,UQCRB,7381:up|hsa:57505,AARS2,57505:up|hsa:1950,EGF,1950:up|hsa:25802,LMOD1,25802:down|hsa:140803,TRPM6,140803:up|hsa:50810,HDGFRP3,50810:up|hsa:1798,DPAGT1,1798:up|hsa:3646,EIF3E,3646:up|hsa:4869,NPM1,4869:up|hsa:2266,FGG,2266:down|hsa:891,CCNB1,891:up|hsa:440689,HIST2H2…	http://amigo.geneontology.org/cgi-bin/amigo/term_details?term=GO:0065003
heart development	Biological Process	GO:0007507	50	492	1438	17840	0.0347705146036161	0.0275784753363229	5.270262e-02	0.6731420	hsa:7122,CLDN5,7122:down|hsa:4052,LTBP1,4052:up|hsa:9150,CTDP1,9150:down|hsa:90,ACVR1,90:up|hsa:70,ACTC1,70:down|hsa:1848,DUSP6,1848:up|hsa:57545,CC2D2A,57545:up|hsa:83605,CCM2,83605:up|hsa:6662,SOX9,6662:up|hsa:26160,IFT172,26160:up|hsa:5532,PPP3CB,5532:up|hsa:7135,TNNI1,7135:up|hsa:9321,TRIP11,9321:up|hsa:891,CCNB1,891:up|hsa:2535,FZD2,2535:up|hsa:6491,STIL,6491:up|hsa:84525,HOPX,84525:down|hsa…	http://amigo.geneontology.org/cgi-bin/amigo/term_details?term=GO:0007507
regulation of nuclear cell cycle DNA replication	Biological Process	GO:0033262	3	11	1438	17840	0.00208623087621697	0.000616591928251121	5.283415e-02	0.6731420	hsa:546,ATRX,546:up|hsa:54962,TIPIN,54962:up|hsa:1602,DACH1,1602:up	http://amigo.geneontology.org/cgi-bin/amigo/term_details?term=GO:0033262
regulation of ventricular cardiac muscle cell action potential	Biological Process	GO:0098911	3	11	1438	17840	0.00208623087621697	0.000616591928251121	5.283415e-02	0.6731420	hsa:3728,JUP,3728:down|hsa:1824,DSC2,1824:up|hsa:1829,DSG2,1829:up	http://amigo.geneontology.org/cgi-bin/amigo/term_details?term=GO:0098911
inner cell mass cell proliferation	Biological Process	GO:0001833	3	11	1438	17840	0.00208623087621697	0.000616591928251121	5.283415e-02	0.6731420	hsa:9837,GINS1,9837:up|hsa:675,BRCA2,675:up|hsa:57167,SALL4,57167:down	http://amigo.geneontology.org/cgi-bin/amigo/term_details?term=GO:0001833
regulation of cholesterol homeostasis	Biological Process	GO:2000188	3	11	1438	17840	0.00208623087621697	0.000616591928251121	5.283415e-02	0.6731420	hsa:10802,SEC24A,10802:up|hsa:9572,NR1D1,9572:down|hsa:6095,RORA,6095:down	http://amigo.geneontology.org/cgi-bin/amigo/term_details?term=GO:2000188
cranial nerve structural organization	Biological Process	GO:0021604	3	11	1438	17840	0.00208623087621697	0.000616591928251121	5.283415e-02	0.6731420	hsa:91584,PLXNA4,91584:down|hsa:3212,HOXB2,3212:down|hsa:1959,EGR2,1959:up	http://amigo.geneontology.org/cgi-bin/amigo/term_details?term=GO:0021604
bronchus development	Biological Process	GO:0060433	3	11	1438	17840	0.00208623087621697	0.000616591928251121	5.283415e-02	0.6731420	hsa:652,BMP4,652:down|hsa:3202,HOXA5,3202:down|hsa:6662,SOX9,6662:up	http://amigo.geneontology.org/cgi-bin/amigo/term_details?term=GO:0060433
negative regulation of centrosome duplication	Biological Process	GO:0010826	3	11	1438	17840	0.00208623087621697	0.000616591928251121	5.283415e-02	0.6731420	hsa:4869,NPM1,4869:up|hsa:672,BRCA1,672:up|hsa:899,CCNF,899:up	http://amigo.geneontology.org/cgi-bin/amigo/term_details?term=GO:0010826
regulation of attachment of spindle microtubules to kinetochore	Biological Process	GO:0051988	3	11	1438	17840	0.00208623087621697	0.000616591928251121	5.283415e-02	0.6731420	hsa:90417,KNSTRN,90417:up|hsa:891,CCNB1,891:up|hsa:4751,NEK2,4751:down	http://amigo.geneontology.org/cgi-bin/amigo/term_details?term=GO:0051988
establishment of apical/basal cell polarity	Biological Process	GO:0035089	3	11	1438	17840	0.00208623087621697	0.000616591928251121	5.283415e-02	0.6731420	hsa:6624,FSCN1,6624:up|hsa:5584,PRKCI,5584:up|hsa:7474,WNT5A,7474:up	http://amigo.geneontology.org/cgi-bin/amigo/term_details?term=GO:0035089
negative regulation of centrosome cycle	Biological Process	GO:0046606	3	11	1438	17840	0.00208623087621697	0.000616591928251121	5.283415e-02	0.6731420	hsa:4869,NPM1,4869:up|hsa:672,BRCA1,672:up|hsa:899,CCNF,899:up	http://amigo.geneontology.org/cgi-bin/amigo/term_details?term=GO:0046606
regulation of establishment of protein localization to chromosome	Biological Process	GO:0070202	3	11	1438	17840	0.00208623087621697	0.000616591928251121	5.283415e-02	0.6731420	hsa:22948,CCT5,22948:up|hsa:10576,CCT2,10576:up|hsa:6950,TCP1,6950:up	http://amigo.geneontology.org/cgi-bin/amigo/term_details?term=GO:0070202
negative regulation of multicellular organism growth	Biological Process	GO:0040015	3	11	1438	17840	0.00208623087621697	0.000616591928251121	5.283415e-02	0.6731420	hsa:51316,PLAC8,51316:up|hsa:10743,RAI1,10743:down|hsa:154,ADRB2,154:down	http://amigo.geneontology.org/cgi-bin/amigo/term_details?term=GO:0040015
regulation of cellular response to hypoxia	Biological Process	GO:1900037	3	11	1438	17840	0.00208623087621697	0.000616591928251121	5.283415e-02	0.6731420	hsa:10525,HYOU1,10525:up|hsa:3776,KCNK2,3776:up|hsa:3091,HIF1A,3091:up	http://amigo.geneontology.org/cgi-bin/amigo/term_details?term=GO:1900037
detection of molecule of bacterial origin	Biological Process	GO:0032490	3	11	1438	17840	0.00208623087621697	0.000616591928251121	5.283415e-02	0.6731420	hsa:7097,TLR2,7097:up|hsa:23643,LY96,23643:up|hsa:7096,TLR1,7096:up	http://amigo.geneontology.org/cgi-bin/amigo/term_details?term=GO:0032490
regulation of odontogenesis of dentin-containing tooth	Biological Process	GO:0042487	3	11	1438	17840	0.00208623087621697	0.000616591928251121	5.283415e-02	0.6731420	hsa:4982,TNFRSF11B,4982:up|hsa:860,RUNX2,860:up|hsa:652,BMP4,652:down	http://amigo.geneontology.org/cgi-bin/amigo/term_details?term=GO:0042487
muscle system process	Biological Process	GO:0003012	41	393	1438	17840	0.0285118219749652	0.0220291479820628	5.309739e-02	0.6731420	hsa:4622,MYH4,4622:down|hsa:9150,CTDP1,9150:down|hsa:3728,JUP,3728:down|hsa:70,ACTC1,70:down|hsa:1410,CRYAB,1410:down|hsa:7094,TLN1,7094:up|hsa:25802,LMOD1,25802:down|hsa:8082,SSPN,8082:up|hsa:7135,TNNI1,7135:up|hsa:18,ABAT,18:up|hsa:10021,HCN4,10021:up|hsa:1113,CHGA,1113:up|hsa:9456,HOMER1,9456:up|hsa:1829,DSG2,1829:up|hsa:3479,IGF1,3479:down|hsa:6548,SLC9A1,6548:down|hsa:5742,PTGS1,5742:down|hs…	http://amigo.geneontology.org/cgi-bin/amigo/term_details?term=GO:0003012
regulation of intracellular transport	Biological Process	GO:0032386	59	593	1438	17840	0.041029207232267	0.0332399103139013	5.352256e-02	0.6731420	hsa:81555,YIPF5,81555:up|hsa:3728,JUP,3728:down|hsa:114899,C1QTNF3,114899:down|hsa:4659,PPP1R12A,4659:up|hsa:1410,CRYAB,1410:down|hsa:1950,EGF,1950:up|hsa:54069,MIS18A,54069:up|hsa:3843,IPO5,3843:up|hsa:5532,PPP3CB,5532:up|hsa:9141,PDCD5,9141:up|hsa:637,BID,637:up|hsa:163882,CNST,163882:down|hsa:51308,REEP2,51308:up|hsa:8723,SNX4,8723:up|hsa:5366,PMAIP1,5366:up|hsa:80184,CEP290,80184:up|hsa:65055…	http://amigo.geneontology.org/cgi-bin/amigo/term_details?term=GO:0032386
microvillus organization	Biological Process	GO:0032528	5	26	1438	17840	0.00347705146036161	0.00145739910313901	5.363455e-02	0.6731420	hsa:2054,STX2,2054:up|hsa:688,KLF5,688:down|hsa:5337,PLD1,5337:down|hsa:6624,FSCN1,6624:up|hsa:5911,RAP2A,5911:up	http://amigo.geneontology.org/cgi-bin/amigo/term_details?term=GO:0032528
establishment or maintenance of epithelial cell apical/basal polarity	Biological Process	GO:0045197	5	26	1438	17840	0.00347705146036161	0.00145739910313901	5.363455e-02	0.6731420	hsa:9355,LHX2,9355:up|hsa:57216,VANGL2,57216:up|hsa:378,ARF4,378:up|hsa:5584,PRKCI,5584:up|hsa:7474,WNT5A,7474:up	http://amigo.geneontology.org/cgi-bin/amigo/term_details?term=GO:0045197
tube morphogenesis	Biological Process	GO:0035239	36	339	1438	17840	0.0250347705146036	0.0190022421524664	5.402288e-02	0.6731420	hsa:2054,STX2,2054:up|hsa:90,ACVR1,90:up|hsa:57545,CC2D2A,57545:up|hsa:83605,CCM2,83605:up|hsa:6662,SOX9,6662:up|hsa:1950,EGF,1950:up|hsa:26160,IFT172,26160:up|hsa:2535,FZD2,2535:up|hsa:6491,STIL,6491:up|hsa:7474,WNT5A,7474:up|hsa:7482,WNT2B,7482:down|hsa:56998,CTNNBIP1,56998:down|hsa:6788,STK3,6788:up|hsa:9355,LHX2,9355:up|hsa:8543,LMO4,8543:up|hsa:8914,TIMELESS,8914:up|hsa:4040,LRP6,4040:up|hsa…	http://amigo.geneontology.org/cgi-bin/amigo/term_details?term=GO:0035239
double-strand break repair	Biological Process	GO:0006302	22	190	1438	17840	0.0152990264255911	0.0106502242152466	5.424287e-02	0.6731420	hsa:7913,DEK,7913:up|hsa:157570,ESCO2,157570:up|hsa:7468,WHSC1,7468:up|hsa:79677,SMC6,79677:up|hsa:64421,DCLRE1C,64421:up|hsa:672,BRCA1,672:up|hsa:641,BLM,641:up|hsa:6119,RPA3,6119:up|hsa:254394,MCM9,254394:down|hsa:401720,FIGNL2,401720:up|hsa:675,BRCA2,675:up|hsa:7158,TP53BP1,7158:up|hsa:10111,RAD50,10111:up|hsa:113130,CDCA5,113130:up|hsa:642636,RAD21L1,642636:down|hsa:84515,MCM8,84515:up|hsa:90…	http://amigo.geneontology.org/cgi-bin/amigo/term_details?term=GO:0006302
regulation of muscle cell apoptotic process	Biological Process	GO:0010660	7	43	1438	17840	0.00486787204450626	0.00241031390134529	5.450900e-02	0.6731420	hsa:4040,LRP6,4040:up|hsa:3717,JAK2,3717:up|hsa:116,ADCYAP1,116:up|hsa:57103,TIGAR,57103:up|hsa:23409,SIRT4,23409:up|hsa:1029,CDKN2A,1029:up|hsa:3479,IGF1,3479:down	http://amigo.geneontology.org/cgi-bin/amigo/term_details?term=GO:0010660
oocyte development	Biological Process	GO:0048599	7	43	1438	17840	0.00486787204450626	0.00241031390134529	5.450900e-02	0.6731420	hsa:675,BRCA2,675:up|hsa:891,CCNB1,891:up|hsa:283,ANG,283:down|hsa:4882,NPR2,4882:down|hsa:668,FOXL2,668:up|hsa:2069,EREG,2069:down|hsa:3479,IGF1,3479:down	http://amigo.geneontology.org/cgi-bin/amigo/term_details?term=GO:0048599
regulation of tyrosine phosphorylation of Stat3 protein	Biological Process	GO:0042516	7	43	1438	17840	0.00486787204450626	0.00241031390134529	5.450900e-02	0.6731420	hsa:5771,PTPN2,5771:up|hsa:388585,HES5,388585:down|hsa:3717,JAK2,3717:up|hsa:8651,SOCS1,8651:up|hsa:3066,HDAC2,3066:up|hsa:5734,PTGER4,5734:up|hsa:5008,OSM,5008:up	http://amigo.geneontology.org/cgi-bin/amigo/term_details?term=GO:0042516
heterotypic cell-cell adhesion	Biological Process	GO:0034113	7	43	1438	17840	0.00486787204450626	0.00241031390134529	5.450900e-02	0.6731420	hsa:2244,FGB,2244:down|hsa:2266,FGG,2266:down|hsa:3728,JUP,3728:down|hsa:1824,DSC2,1824:up|hsa:9314,KLF4,9314:down|hsa:3676,ITGA4,3676:up|hsa:1829,DSG2,1829:up	http://amigo.geneontology.org/cgi-bin/amigo/term_details?term=GO:0034113
positive regulation of transcription from RNA polymerase II promoter	Biological Process	GO:0045944	95	1004	1438	17840	0.0660639777468707	0.0562780269058296	5.505009e-02	0.6731420	hsa:892,CCNC,892:up|hsa:6938,TCF12,6938:up|hsa:90,ACVR1,90:up|hsa:546,ATRX,546:up|hsa:1875,E2F5,1875:up|hsa:10974,ADIRF,10974:down|hsa:6596,HLTF,6596:up|hsa:6095,RORA,6095:down|hsa:1390,CREM,1390:up|hsa:7474,WNT5A,7474:up|hsa:26053,AUTS2,26053:up|hsa:84662,GLIS2,84662:up|hsa:8543,LMO4,8543:up|hsa:3479,IGF1,3479:down|hsa:55294,FBXW7,55294:down|hsa:7707,ZNF148,7707:up|hsa:166793,ZBTB49,166793:up|hs…	http://amigo.geneontology.org/cgi-bin/amigo/term_details?term=GO:0045944
negative regulation of protein complex assembly	Biological Process	GO:0031333	14	109	1438	17840	0.00973574408901252	0.00610986547085202	5.505704e-02	0.6731420	hsa:5756,TWF1,5756:up|hsa:56998,CTNNBIP1,56998:down|hsa:29765,TMOD4,29765:up|hsa:6712,SPTBN2,6712:down|hsa:114088,TRIM9,114088:up|hsa:10677,AVIL,10677:up|hsa:8543,LMO4,8543:up|hsa:25802,LMOD1,25802:down|hsa:5734,PTGER4,5734:up|hsa:830,CAPZA2,830:up|hsa:27124,INPP5J,27124:down|hsa:3925,STMN1,3925:up|hsa:54739,XAF1,54739:up|hsa:85477,SCIN,85477:down	http://amigo.geneontology.org/cgi-bin/amigo/term_details?term=GO:0031333
eye morphogenesis	Biological Process	GO:0048592	17	139	1438	17840	0.0118219749652295	0.0077914798206278	5.509380e-02	0.6731420	hsa:6662,SOX9,6662:up|hsa:6247,RS1,6247:down|hsa:2047,EPHB1,2047:down|hsa:25987,TSKU,25987:up|hsa:7482,WNT2B,7482:down|hsa:7474,WNT5A,7474:up|hsa:3091,HIF1A,3091:up|hsa:80184,CEP290,80184:up|hsa:28996,HIPK2,28996:up|hsa:220,ALDH1A3,220:up|hsa:668,FOXL2,668:up|hsa:5584,PRKCI,5584:up|hsa:4040,LRP6,4040:up|hsa:64220,STRA6,64220:up|hsa:4901,NRL,4901:up|hsa:652,BMP4,652:down|hsa:4211,MEIS1,4211:up	http://amigo.geneontology.org/cgi-bin/amigo/term_details?term=GO:0048592
regulation of isomerase activity	Biological Process	GO:0010911	2	5	1438	17840	0.00139082058414465	0.000280269058295964	5.509384e-02	0.6731420	hsa:5359,PLSCR1,5359:up|hsa:29128,UHRF1,29128:up	http://amigo.geneontology.org/cgi-bin/amigo/term_details?term=GO:0010911
septum primum development	Biological Process	GO:0003284	2	5	1438	17840	0.00139082058414465	0.000280269058295964	5.509384e-02	0.6731420	hsa:7468,WHSC1,7468:up|hsa:90,ACVR1,90:up	http://amigo.geneontology.org/cgi-bin/amigo/term_details?term=GO:0003284
negative regulation of establishment of protein localization to mitochondrion	Biological Process	GO:1903748	2	5	1438	17840	0.00139082058414465	0.000280269058295964	5.509384e-02	0.6731420	hsa:10808,HSPH1,10808:up|hsa:23409,SIRT4,23409:up	http://amigo.geneontology.org/cgi-bin/amigo/term_details?term=GO:1903748
response to hydroxyurea	Biological Process	GO:0072710	2	5	1438	17840	0.00139082058414465	0.000280269058295964	5.509384e-02	0.6731420	hsa:641,BLM,641:up|hsa:546,ATRX,546:up	http://amigo.geneontology.org/cgi-bin/amigo/term_details?term=GO:0072710
attachment of mitotic spindle microtubules to kinetochore	Biological Process	GO:0051315	2	5	1438	17840	0.00139082058414465	0.000280269058295964	5.509384e-02	0.6731420	hsa:1062,CENPE,1062:up|hsa:10403,NDC80,10403:up	http://amigo.geneontology.org/cgi-bin/amigo/term_details?term=GO:0051315
interleukin-4-mediated signaling pathway	Biological Process	GO:0035771	2	5	1438	17840	0.00139082058414465	0.000280269058295964	5.509384e-02	0.6731420	hsa:5771,PTPN2,5771:up|hsa:3561,IL2RG,3561:up	http://amigo.geneontology.org/cgi-bin/amigo/term_details?term=GO:0035771
negative regulation of DNA endoreduplication	Biological Process	GO:0032876	2	5	1438	17840	0.00139082058414465	0.000280269058295964	5.509384e-02	0.6731420	hsa:55294,FBXW7,55294:down|hsa:10735,STAG2,10735:up	http://amigo.geneontology.org/cgi-bin/amigo/term_details?term=GO:0032876
cellular response to cobalt ion	Biological Process	GO:0071279	2	5	1438	17840	0.00139082058414465	0.000280269058295964	5.509384e-02	0.6731420	hsa:57103,TIGAR,57103:up|hsa:3091,HIF1A,3091:up	http://amigo.geneontology.org/cgi-bin/amigo/term_details?term=GO:0071279
intestinal epithelial structure maintenance	Biological Process	GO:0060729	2	5	1438	17840	0.00139082058414465	0.000280269058295964	5.509384e-02	0.6731420	hsa:6662,SOX9,6662:up|hsa:6584,SLC22A5,6584:up	http://amigo.geneontology.org/cgi-bin/amigo/term_details?term=GO:0060729
nucleoside monophosphate phosphorylation	Biological Process	GO:0046940	2	5	1438	17840	0.00139082058414465	0.000280269058295964	5.509384e-02	0.6731420	hsa:205,AK4,205:down|hsa:1841,DTYMK,1841:up	http://amigo.geneontology.org/cgi-bin/amigo/term_details?term=GO:0046940
positive regulation of hyaluronan biosynthetic process	Biological Process	GO:1900127	2	5	1438	17840	0.00139082058414465	0.000280269058295964	5.509384e-02	0.6731420	hsa:1950,EGF,1950:up|hsa:5734,PTGER4,5734:up	http://amigo.geneontology.org/cgi-bin/amigo/term_details?term=GO:1900127
response to methotrexate	Biological Process	GO:0031427	2	5	1438	17840	0.00139082058414465	0.000280269058295964	5.509384e-02	0.6731420	hsa:1719,DHFR,1719:up|hsa:9356,SLC22A6,9356:up	http://amigo.geneontology.org/cgi-bin/amigo/term_details?term=GO:0031427
negative regulation of response to interferon-gamma	Biological Process	GO:0060331	2	5	1438	17840	0.00139082058414465	0.000280269058295964	5.509384e-02	0.6731420	hsa:5771,PTPN2,5771:up|hsa:9093,DNAJA3,9093:up	http://amigo.geneontology.org/cgi-bin/amigo/term_details?term=GO:0060331
fructose catabolic process to hydroxyacetone phosphate and glyceraldehyde-3-phosphate	Biological Process	GO:0061624	2	5	1438	17840	0.00139082058414465	0.000280269058295964	5.509384e-02	0.6731420	hsa:229,ALDOB,229:down|hsa:3795,KHK,3795:up	http://amigo.geneontology.org/cgi-bin/amigo/term_details?term=GO:0061624
regulation of L-glutamate transport	Biological Process	GO:0002036	2	5	1438	17840	0.00139082058414465	0.000280269058295964	5.509384e-02	0.6731420	hsa:10550,ARL6IP5,10550:up|hsa:23204,ARL6IP1,23204:up	http://amigo.geneontology.org/cgi-bin/amigo/term_details?term=GO:0002036
somite specification	Biological Process	GO:0001757	2	5	1438	17840	0.00139082058414465	0.000280269058295964	5.509384e-02	0.6731420	hsa:4222,MEOX1,4222:up|hsa:23242,COBL,23242:down	http://amigo.geneontology.org/cgi-bin/amigo/term_details?term=GO:0001757
interleukin-1 alpha secretion	Biological Process	GO:0050703	2	5	1438	17840	0.00139082058414465	0.000280269058295964	5.509384e-02	0.6731420	hsa:24145,PANX1,24145:up|hsa:5734,PTGER4,5734:up	http://amigo.geneontology.org/cgi-bin/amigo/term_details?term=GO:0050703
cellular response to hydroxyurea	Biological Process	GO:0072711	2	5	1438	17840	0.00139082058414465	0.000280269058295964	5.509384e-02	0.6731420	hsa:641,BLM,641:up|hsa:546,ATRX,546:up	http://amigo.geneontology.org/cgi-bin/amigo/term_details?term=GO:0072711
soft palate development	Biological Process	GO:0060023	2	5	1438	17840	0.00139082058414465	0.000280269058295964	5.509384e-02	0.6731420	hsa:2304,FOXE1,2304:up|hsa:1302,COL11A2,1302:up	http://amigo.geneontology.org/cgi-bin/amigo/term_details?term=GO:0060023
fructose catabolic process	Biological Process	GO:0006001	2	5	1438	17840	0.00139082058414465	0.000280269058295964	5.509384e-02	0.6731420	hsa:229,ALDOB,229:down|hsa:3795,KHK,3795:up	http://amigo.geneontology.org/cgi-bin/amigo/term_details?term=GO:0006001
positive regulation of isomerase activity	Biological Process	GO:0010912	2	5	1438	17840	0.00139082058414465	0.000280269058295964	5.509384e-02	0.6731420	hsa:5359,PLSCR1,5359:up|hsa:29128,UHRF1,29128:up	http://amigo.geneontology.org/cgi-bin/amigo/term_details?term=GO:0010912
regulation of prostatic bud formation	Biological Process	GO:0060685	2	5	1438	17840	0.00139082058414465	0.000280269058295964	5.509384e-02	0.6731420	hsa:652,BMP4,652:down|hsa:7474,WNT5A,7474:up	http://amigo.geneontology.org/cgi-bin/amigo/term_details?term=GO:0060685
regulation of bone mineralization involved in bone maturation	Biological Process	GO:1900157	2	5	1438	17840	0.00139082058414465	0.000280269058295964	5.509384e-02	0.6731420	hsa:26585,GREM1,26585:down|hsa:359845,FAM101B,359845:up	http://amigo.geneontology.org/cgi-bin/amigo/term_details?term=GO:1900157
negative regulation of interferon-gamma-mediated signaling pathway	Biological Process	GO:0060336	2	5	1438	17840	0.00139082058414465	0.000280269058295964	5.509384e-02	0.6731420	hsa:5771,PTPN2,5771:up|hsa:9093,DNAJA3,9093:up	http://amigo.geneontology.org/cgi-bin/amigo/term_details?term=GO:0060336
response to indole-3-methanol	Biological Process	GO:0071680	2	5	1438	17840	0.00139082058414465	0.000280269058295964	5.509384e-02	0.6731420	hsa:672,BRCA1,672:up|hsa:3728,JUP,3728:down	http://amigo.geneontology.org/cgi-bin/amigo/term_details?term=GO:0071680
pulmonary artery morphogenesis	Biological Process	GO:0061156	2	5	1438	17840	0.00139082058414465	0.000280269058295964	5.509384e-02	0.6731420	hsa:64220,STRA6,64220:up|hsa:652,BMP4,652:down	http://amigo.geneontology.org/cgi-bin/amigo/term_details?term=GO:0061156
regulation of Fc receptor mediated stimulatory signaling pathway	Biological Process	GO:0060368	2	5	1438	17840	0.00139082058414465	0.000280269058295964	5.509384e-02	0.6731420	hsa:5359,PLSCR1,5359:up|hsa:10666,CD226,10666:up	http://amigo.geneontology.org/cgi-bin/amigo/term_details?term=GO:0060368
meiotic chromosome condensation	Biological Process	GO:0010032	2	5	1438	17840	0.00139082058414465	0.000280269058295964	5.509384e-02	0.6731420	hsa:10592,SMC2,10592:up|hsa:10051,SMC4,10051:up	http://amigo.geneontology.org/cgi-bin/amigo/term_details?term=GO:0010032
regulation of synaptic vesicle priming	Biological Process	GO:0010807	2	5	1438	17840	0.00139082058414465	0.000280269058295964	5.509384e-02	0.6731420	hsa:112755,STX1B,112755:up|hsa:6804,STX1A,6804:up	http://amigo.geneontology.org/cgi-bin/amigo/term_details?term=GO:0010807
negative regulation of myosin-light-chain-phosphatase activity	Biological Process	GO:0035509	2	5	1438	17840	0.00139082058414465	0.000280269058295964	5.509384e-02	0.6731420	hsa:6093,ROCK1,6093:up|hsa:9475,ROCK2,9475:up	http://amigo.geneontology.org/cgi-bin/amigo/term_details?term=GO:0035509
negative regulation of protein folding	Biological Process	GO:1903333	2	5	1438	17840	0.00139082058414465	0.000280269058295964	5.509384e-02	0.6731420	hsa:9141,PDCD5,9141:up|hsa:5082,PDCL,5082:up	http://amigo.geneontology.org/cgi-bin/amigo/term_details?term=GO:1903333
negative regulation of Golgi to plasma membrane protein transport	Biological Process	GO:0042997	2	5	1438	17840	0.00139082058414465	0.000280269058295964	5.509384e-02	0.6731420	hsa:91461,PKDCC,91461:down|hsa:57120,GOPC,57120:up	http://amigo.geneontology.org/cgi-bin/amigo/term_details?term=GO:0042997
cellular response to indole-3-methanol	Biological Process	GO:0071681	2	5	1438	17840	0.00139082058414465	0.000280269058295964	5.509384e-02	0.6731420	hsa:672,BRCA1,672:up|hsa:3728,JUP,3728:down	http://amigo.geneontology.org/cgi-bin/amigo/term_details?term=GO:0071681
macrophage colony-stimulating factor signaling pathway	Biological Process	GO:0038145	2	5	1438	17840	0.00139082058414465	0.000280269058295964	5.509384e-02	0.6731420	hsa:5771,PTPN2,5771:up|hsa:4486,MST1R,4486:down	http://amigo.geneontology.org/cgi-bin/amigo/term_details?term=GO:0038145
negative regulation of nuclear division	Biological Process	GO:0051784	8	52	1438	17840	0.00556328233657858	0.00291479820627803	5.510117e-02	0.6731420	hsa:7175,TPR,7175:up|hsa:146691,TOM1L2,146691:down|hsa:546,ATRX,546:up|hsa:1063,CENPF,1063:up|hsa:699,BUB1,699:up|hsa:652,BMP4,652:down|hsa:891,CCNB1,891:up|hsa:5008,OSM,5008:up	http://amigo.geneontology.org/cgi-bin/amigo/term_details?term=GO:0051784
epithelium development	Biological Process	GO:0060429	104	1108	1438	17840	0.0723226703755216	0.0621076233183857	5.521756e-02	0.6731420	hsa:23086,EXPH5,23086:down|hsa:2054,STX2,2054:up|hsa:56647,BCCIP,56647:up|hsa:7122,CLDN5,7122:down|hsa:90,ACVR1,90:up|hsa:546,ATRX,546:up|hsa:57545,CC2D2A,57545:up|hsa:5721,PSME2,5721:up|hsa:1950,EGF,1950:up|hsa:26160,IFT172,26160:up|hsa:353139,LCE2A,353139:down|hsa:2535,FZD2,2535:up|hsa:6491,STIL,6491:up|hsa:7474,WNT5A,7474:up|hsa:7482,WNT2B,7482:down|hsa:230,ALDOC,230:down|hsa:8543,LMO4,8543:up…	http://amigo.geneontology.org/cgi-bin/amigo/term_details?term=GO:0060429
striated muscle cell development	Biological Process	GO:0055002	16	129	1438	17840	0.0111265646731572	0.00723094170403587	5.533680e-02	0.6731420	hsa:9150,CTDP1,9150:down|hsa:70,ACTC1,70:down|hsa:4878,NPPA,4878:up|hsa:25802,LMOD1,25802:down|hsa:58529,MYOZ1,58529:up|hsa:891,CCNB1,891:up|hsa:91624,NEXN,91624:up|hsa:4629,MYH11,4629:down|hsa:29765,TMOD4,29765:up|hsa:9456,HOMER1,9456:up|hsa:10529,NEBL,10529:down|hsa:23363,OBSL1,23363:up|hsa:3479,IGF1,3479:down|hsa:652,BMP4,652:down|hsa:7168,TPM1,7168:up|hsa:9474,ATG5,9474:up	http://amigo.geneontology.org/cgi-bin/amigo/term_details?term=GO:0055002
development of primary male sexual characteristics	Biological Process	GO:0046546	16	129	1438	17840	0.0111265646731572	0.00723094170403587	5.533680e-02	0.6731420	hsa:546,ATRX,546:up|hsa:4142,MAS1,4142:down|hsa:259266,ASPM,259266:up|hsa:638,BIK,638:up|hsa:6662,SOX9,6662:up|hsa:51742,ARID4B,51742:up|hsa:2175,FANCA,2175:up|hsa:7482,WNT2B,7482:down|hsa:3206,HOXA10,3206:down|hsa:7474,WNT5A,7474:up|hsa:56956,LHX9,56956:up|hsa:3205,HOXA9,3205:down|hsa:1515,CTSV,1515:up|hsa:642636,RAD21L1,642636:down|hsa:6665,SOX15,6665:down|hsa:10018,BCL2L11,10018:up	http://amigo.geneontology.org/cgi-bin/amigo/term_details?term=GO:0046546
male gonad development	Biological Process	GO:0008584	16	129	1438	17840	0.0111265646731572	0.00723094170403587	5.533680e-02	0.6731420	hsa:546,ATRX,546:up|hsa:4142,MAS1,4142:down|hsa:259266,ASPM,259266:up|hsa:638,BIK,638:up|hsa:6662,SOX9,6662:up|hsa:51742,ARID4B,51742:up|hsa:2175,FANCA,2175:up|hsa:7482,WNT2B,7482:down|hsa:3206,HOXA10,3206:down|hsa:7474,WNT5A,7474:up|hsa:56956,LHX9,56956:up|hsa:3205,HOXA9,3205:down|hsa:1515,CTSV,1515:up|hsa:642636,RAD21L1,642636:down|hsa:6665,SOX15,6665:down|hsa:10018,BCL2L11,10018:up	http://amigo.geneontology.org/cgi-bin/amigo/term_details?term=GO:0008584
synapse organization	Biological Process	GO:0050808	25	222	1438	17840	0.0173852573018081	0.0124439461883408	5.572407e-02	0.6731420	hsa:57717,PCDHB16,57717:up|hsa:6712,SPTBN2,6712:down|hsa:6623,SNCG,6623:down|hsa:80059,LRRTM4,80059:up|hsa:27185,DISC1,27185:down|hsa:9746,CLSTN3,9746:up|hsa:64284,RAB17,64284:up|hsa:23768,FLRT2,23768:up|hsa:56133,PCDHB2,56133:up|hsa:2047,EPHB1,2047:down|hsa:9378,NRXN1,9378:down|hsa:1134,CHRNA1,1134:up|hsa:9148,NEURL1,9148:down|hsa:8927,BSN,8927:up|hsa:7474,WNT5A,7474:up|hsa:56097,PCDHGC5,56097:u…	http://amigo.geneontology.org/cgi-bin/amigo/term_details?term=GO:0050808
skeletal system development	Biological Process	GO:0001501	49	483	1438	17840	0.0340751043115438	0.0270739910313901	5.599725e-02	0.6731420	hsa:860,RUNX2,860:up|hsa:51141,INSIG2,51141:up|hsa:3636,INPPL1,3636:up|hsa:659,BMPR2,659:up|hsa:9060,PAPSS2,9060:up|hsa:4882,NPR2,4882:down|hsa:6662,SOX9,6662:up|hsa:9451,EIF2AK3,9451:up|hsa:26160,IFT172,26160:up|hsa:10743,RAI1,10743:down|hsa:56243,SKT,56243:up|hsa:1009,CDH11,1009:up|hsa:359845,FAM101B,359845:up|hsa:3212,HOXB2,3212:down|hsa:80739,C6orf25,80739:down|hsa:60676,PAPPA2,60676:down|hsa…	http://amigo.geneontology.org/cgi-bin/amigo/term_details?term=GO:0001501
heart contraction	Biological Process	GO:0060047	28	254	1438	17840	0.019471488178025	0.014237668161435	5.621347e-02	0.6731420	hsa:10142,AKAP9,10142:up|hsa:3728,JUP,3728:down|hsa:70,ACTC1,70:down|hsa:3759,KCNJ2,3759:down|hsa:157378,TMEM65,157378:up|hsa:4878,NPPA,4878:up|hsa:4882,NPR2,4882:down|hsa:1573,CYP2J2,1573:down|hsa:7135,TNNI1,7135:up|hsa:154,ADRB2,154:down|hsa:10021,HCN4,10021:up|hsa:3757,KCNH2,3757:up|hsa:487,ATP2A1,487:up|hsa:1113,CHGA,1113:up|hsa:84525,HOPX,84525:down|hsa:7852,CXCR4,7852:up|hsa:3750,KCND1,3750…	http://amigo.geneontology.org/cgi-bin/amigo/term_details?term=GO:0060047
axis specification	Biological Process	GO:0009798	12	90	1438	17840	0.00834492350486787	0.00504484304932735	5.715589e-02	0.6731420	hsa:57669,EPB41L5,57669:up|hsa:1046,CDX4,1046:down|hsa:200894,ARL13B,200894:up|hsa:1950,EGF,1950:up|hsa:4040,LRP6,4040:up|hsa:26160,IFT172,26160:up|hsa:652,BMP4,652:down|hsa:6491,STIL,6491:up|hsa:55329,MNS1,55329:up|hsa:23242,COBL,23242:down|hsa:6781,STC1,6781:up|hsa:7474,WNT5A,7474:up	http://amigo.geneontology.org/cgi-bin/amigo/term_details?term=GO:0009798
regulation of microtubule-based process	Biological Process	GO:0032886	18	150	1438	17840	0.0125173852573018	0.00840807174887892	5.764796e-02	0.6731420	hsa:90417,KNSTRN,90417:up|hsa:57662,CAMSAP3,57662:down|hsa:50810,HDGFRP3,50810:up|hsa:4869,NPM1,4869:up|hsa:672,BRCA1,672:up|hsa:891,CCNB1,891:up|hsa:899,CCNF,899:up|hsa:27124,INPP5J,27124:down|hsa:3925,STMN1,3925:up|hsa:7175,TPR,7175:up|hsa:57159,TRIM54,57159:up|hsa:7514,XPO1,7514:up|hsa:4751,NEK2,4751:down|hsa:57542,KLHL42,57542:up|hsa:26054,SENP6,26054:up|hsa:9475,ROCK2,9475:up|hsa:4281,MID1,4…	http://amigo.geneontology.org/cgi-bin/amigo/term_details?term=GO:0032886
regulation of cellular protein localization	Biological Process	GO:1903827	55	551	1438	17840	0.0382475660639777	0.0308856502242152	5.769180e-02	0.6731420	hsa:10808,HSPH1,10808:up|hsa:3728,JUP,3728:down|hsa:114899,C1QTNF3,114899:down|hsa:1950,EGF,1950:up|hsa:54069,MIS18A,54069:up|hsa:3843,IPO5,3843:up|hsa:9451,EIF2AK3,9451:up|hsa:5532,PPP3CB,5532:up|hsa:891,CCNB1,891:up|hsa:9141,PDCD5,9141:up|hsa:637,BID,637:up|hsa:7474,WNT5A,7474:up|hsa:22948,CCT5,22948:up|hsa:3799,KIF5B,3799:up|hsa:163882,CNST,163882:down|hsa:23607,CD2AP,23607:up|hsa:5366,PMAIP1,…	http://amigo.geneontology.org/cgi-bin/amigo/term_details?term=GO:1903827
bone mineralization	Biological Process	GO:0030282	13	100	1438	17840	0.0090403337969402	0.00560538116591928	5.812176e-02	0.6731420	hsa:26585,GREM1,26585:down|hsa:90,ACVR1,90:up|hsa:54829,ASPN,54829:up|hsa:659,BMPR2,659:up|hsa:3091,HIF1A,3091:up|hsa:6662,SOX9,6662:up|hsa:9451,EIF2AK3,9451:up|hsa:3479,IGF1,3479:down|hsa:7286,TUFT1,7286:down|hsa:154,ADRB2,154:down|hsa:652,BMP4,652:down|hsa:91461,PKDCC,91461:down|hsa:359845,FAM101B,359845:up	http://amigo.geneontology.org/cgi-bin/amigo/term_details?term=GO:0030282
RNA biosynthetic process	Biological Process	GO:0032774	323	3712	1438	17840	0.22461752433936	0.208071748878924	5.817718e-02	0.6731420	hsa:90,ACVR1,90:up|hsa:1950,EGF,1950:up|hsa:4869,NPM1,4869:up|hsa:65056,GPBP1,65056:up|hsa:6596,HLTF,6596:up|hsa:170622,COMMD6,170622:up|hsa:26053,AUTS2,26053:up|hsa:56924,PAK6,56924:down|hsa:440400,RNASEK,440400:up|hsa:7752,ZNF200,7752:up|hsa:3479,IGF1,3479:down|hsa:7707,ZNF148,7707:up|hsa:1408,CRY2,1408:down|hsa:92552,ATXN3L,92552:down|hsa:1786,DNMT1,1786:up|hsa:27332,ZNF638,27332:up|hsa:6787,N…	http://amigo.geneontology.org/cgi-bin/amigo/term_details?term=GO:0032774
maintenance of protein location in cell	Biological Process	GO:0032507	16	130	1438	17840	0.0111265646731572	0.00728699551569507	5.859639e-02	0.6731420	hsa:90417,KNSTRN,90417:up|hsa:11116,FGFR1OP,11116:up|hsa:9648,GCC2,9648:up|hsa:57662,CAMSAP3,57662:down|hsa:3728,JUP,3728:down|hsa:7094,TLN1,7094:up|hsa:57120,GOPC,57120:up|hsa:10403,NDC80,10403:up|hsa:891,CCNB1,891:up|hsa:85477,SCIN,85477:down|hsa:5756,TWF1,5756:up|hsa:675,BRCA2,675:up|hsa:4751,NEK2,4751:down|hsa:81573,ANKRD13C,81573:up|hsa:23345,SYNE1,23345:down|hsa:1062,CENPE,1062:up	http://amigo.geneontology.org/cgi-bin/amigo/term_details?term=GO:0032507
coenzyme metabolic process	Biological Process	GO:0006732	32	298	1438	17840	0.0222531293463143	0.0167040358744395	5.863030e-02	0.6731420	hsa:349565,NMNAT3,349565:down|hsa:10157,AASS,10157:up|hsa:5166,PDK4,5166:down|hsa:8884,SLC5A6,8884:up|hsa:284486,THEM5,284486:down|hsa:4338,MOCS2,4338:up|hsa:83594,NUDT12,83594:up|hsa:60496,AASDHPPT,60496:up|hsa:729020,RPEL1,729020:up|hsa:57103,TIGAR,57103:up|hsa:57834,CYP4F11,57834:up|hsa:230,ALDOC,230:down|hsa:26027,ACOT11,26027:up|hsa:3479,IGF1,3479:down|hsa:5805,PTS,5805:up|hsa:4200,ME2,4200:…	http://amigo.geneontology.org/cgi-bin/amigo/term_details?term=GO:0006732
lymphocyte homeostasis	Biological Process	GO:0002260	9	62	1438	17840	0.0062586926286509	0.00347533632286996	5.943673e-02	0.6731420	hsa:57864,SLC46A2,57864:down|hsa:5366,PMAIP1,5366:up|hsa:115650,TNFRSF13C,115650:down|hsa:3091,HIF1A,3091:up|hsa:9093,DNAJA3,9093:up|hsa:3559,IL2RA,3559:up|hsa:5532,PPP3CB,5532:up|hsa:10018,BCL2L11,10018:up|hsa:9133,CCNB2,9133:up	http://amigo.geneontology.org/cgi-bin/amigo/term_details?term=GO:0002260
positive regulation of insulin secretion	Biological Process	GO:0032024	9	62	1438	17840	0.0062586926286509	0.00347533632286996	5.943673e-02	0.6731420	hsa:222546,RFX6,222546:down|hsa:3091,HIF1A,3091:up|hsa:7447,VSNL1,7447:up|hsa:3717,JAK2,3717:up|hsa:169026,SLC30A8,169026:down|hsa:5532,PPP3CB,5532:up|hsa:18,ABAT,18:up|hsa:5213,PFKM,5213:up|hsa:2822,GPLD1,2822:down	http://amigo.geneontology.org/cgi-bin/amigo/term_details?term=GO:0032024
establishment of protein localization to membrane	Biological Process	GO:0090150	37	353	1438	17840	0.0257301808066759	0.0197869955156951	6.005740e-02	0.6731420	hsa:64108,RTP4,64108:up|hsa:3728,JUP,3728:down|hsa:6235,RPS29,6235:up|hsa:11231,SEC63,11231:up|hsa:9141,PDCD5,9141:up|hsa:637,BID,637:up|hsa:26262,TSPAN17,26262:up|hsa:6164,RPL34,6164:up|hsa:84938,ATG4C,84938:up|hsa:3799,KIF5B,3799:up|hsa:163882,CNST,163882:down|hsa:51308,REEP2,51308:up|hsa:5366,PMAIP1,5366:up|hsa:6170,RPL39,6170:up|hsa:65055,REEP1,65055:up|hsa:5584,PRKCI,5584:up|hsa:23204,ARL6IP…	http://amigo.geneontology.org/cgi-bin/amigo/term_details?term=GO:0090150
tyrosine phosphorylation of Stat3 protein	Biological Process	GO:0042503	7	44	1438	17840	0.00486787204450626	0.00246636771300448	6.051032e-02	0.6731420	hsa:5771,PTPN2,5771:up|hsa:388585,HES5,388585:down|hsa:3717,JAK2,3717:up|hsa:8651,SOCS1,8651:up|hsa:3066,HDAC2,3066:up|hsa:5734,PTGER4,5734:up|hsa:5008,OSM,5008:up	http://amigo.geneontology.org/cgi-bin/amigo/term_details?term=GO:0042503
actin filament depolymerization	Biological Process	GO:0030042	8	53	1438	17840	0.00556328233657858	0.00297085201793722	6.051840e-02	0.6731420	hsa:5756,TWF1,5756:up|hsa:29765,TMOD4,29765:up|hsa:6712,SPTBN2,6712:down|hsa:57026,PDXP,57026:up|hsa:10677,AVIL,10677:up|hsa:25802,LMOD1,25802:down|hsa:830,CAPZA2,830:up|hsa:85477,SCIN,85477:down	http://amigo.geneontology.org/cgi-bin/amigo/term_details?term=GO:0030042
myofibril assembly	Biological Process	GO:0030239	8	53	1438	17840	0.00556328233657858	0.00297085201793722	6.051840e-02	0.6731420	hsa:29765,TMOD4,29765:up|hsa:23363,OBSL1,23363:up|hsa:70,ACTC1,70:down|hsa:10529,NEBL,10529:down|hsa:25802,LMOD1,25802:down|hsa:58529,MYOZ1,58529:up|hsa:7168,TPM1,7168:up|hsa:4629,MYH11,4629:down	http://amigo.geneontology.org/cgi-bin/amigo/term_details?term=GO:0030239
transcription, DNA-templated	Biological Process	GO:0006351	312	3583	1438	17840	0.216968011126565	0.200840807174888	6.058637e-02	0.6731420	hsa:90,ACVR1,90:up|hsa:1950,EGF,1950:up|hsa:4869,NPM1,4869:up|hsa:65056,GPBP1,65056:up|hsa:6596,HLTF,6596:up|hsa:170622,COMMD6,170622:up|hsa:26053,AUTS2,26053:up|hsa:56924,PAK6,56924:down|hsa:440400,RNASEK,440400:up|hsa:7752,ZNF200,7752:up|hsa:3479,IGF1,3479:down|hsa:7707,ZNF148,7707:up|hsa:1408,CRY2,1408:down|hsa:92552,ATXN3L,92552:down|hsa:1786,DNMT1,1786:up|hsa:27332,ZNF638,27332:up|hsa:6787,N…	http://amigo.geneontology.org/cgi-bin/amigo/term_details?term=GO:0006351
nucleic acid metabolic process	Biological Process	GO:0090304	420	4892	1438	17840	0.292072322670376	0.274215246636771	6.093769e-02	0.6731420	hsa:90,ACVR1,90:up|hsa:57505,AARS2,57505:up|hsa:1950,EGF,1950:up|hsa:4869,NPM1,4869:up|hsa:65056,GPBP1,65056:up|hsa:6596,HLTF,6596:up|hsa:891,CCNB1,891:up|hsa:170622,COMMD6,170622:up|hsa:26053,AUTS2,26053:up|hsa:56924,PAK6,56924:down|hsa:440400,RNASEK,440400:up|hsa:7752,ZNF200,7752:up|hsa:3479,IGF1,3479:down|hsa:7707,ZNF148,7707:up|hsa:1408,CRY2,1408:down|hsa:93587,TRMT10A,93587:up|hsa:92552,ATXN…	http://amigo.geneontology.org/cgi-bin/amigo/term_details?term=GO:0090304
positive regulation of chondrocyte differentiation	Biological Process	GO:0032332	4	19	1438	17840	0.00278164116828929	0.00106502242152466	6.144567e-02	0.6731420	hsa:860,RUNX2,860:up|hsa:91461,PKDCC,91461:down|hsa:55553,SOX6,55553:down|hsa:6662,SOX9,6662:up	http://amigo.geneontology.org/cgi-bin/amigo/term_details?term=GO:0032332
plasma lipoprotein particle assembly	Biological Process	GO:0034377	4	19	1438	17840	0.00278164116828929	0.00106502242152466	6.144567e-02	0.6731420	hsa:4547,MTTP,4547:down|hsa:8435,SOAT2,8435:up|hsa:338,APOB,338:down|hsa:2181,ACSL3,2181:up	http://amigo.geneontology.org/cgi-bin/amigo/term_details?term=GO:0034377
GMP metabolic process	Biological Process	GO:0046037	4	19	1438	17840	0.00278164116828929	0.00106502242152466	6.144567e-02	0.6731420	hsa:1740,DLG2,1740:down|hsa:8573,CASK,8573:up|hsa:5158,PDE6B,5158:up|hsa:5145,PDE6A,5145:up	http://amigo.geneontology.org/cgi-bin/amigo/term_details?term=GO:0046037
regulation of keratinocyte proliferation	Biological Process	GO:0010837	5	27	1438	17840	0.00347705146036161	0.00151345291479821	6.163125e-02	0.6731420	hsa:7421,VDR,7421:up|hsa:8573,CASK,8573:up|hsa:57152,SLURP1,57152:down|hsa:252983,STXBP4,252983:up|hsa:1515,CTSV,1515:up	http://amigo.geneontology.org/cgi-bin/amigo/term_details?term=GO:0010837
motor neuron axon guidance	Biological Process	GO:0008045	5	27	1438	17840	0.00347705146036161	0.00151345291479821	6.163125e-02	0.6731420	hsa:1123,CHN1,1123:up|hsa:91584,PLXNA4,91584:down|hsa:56956,LHX9,56956:up|hsa:214,ALCAM,214:up|hsa:1959,EGR2,1959:up	http://amigo.geneontology.org/cgi-bin/amigo/term_details?term=GO:0008045
centriole replication	Biological Process	GO:0007099	5	27	1438	17840	0.00347705146036161	0.00151345291479821	6.163125e-02	0.6731420	hsa:22995,CEP152,22995:up|hsa:4869,NPM1,4869:up|hsa:672,BRCA1,672:up|hsa:9738,CCP110,9738:up|hsa:163786,SASS6,163786:up	http://amigo.geneontology.org/cgi-bin/amigo/term_details?term=GO:0007099
prostate gland morphogenesis	Biological Process	GO:0060512	5	27	1438	17840	0.00347705146036161	0.00151345291479821	6.163125e-02	0.6731420	hsa:5268,SERPINB5,5268:down|hsa:652,BMP4,652:down|hsa:6662,SOX9,6662:up|hsa:1396,CRIP1,1396:down|hsa:7474,WNT5A,7474:up	http://amigo.geneontology.org/cgi-bin/amigo/term_details?term=GO:0060512
calcium-dependent cell-cell adhesion via plasma membrane cell adhesion molecules	Biological Process	GO:0016339	5	27	1438	17840	0.00347705146036161	0.00151345291479821	6.163125e-02	0.6731420	hsa:57717,PCDHB16,57717:up|hsa:22920,KIFAP3,22920:up|hsa:56133,PCDHB2,56133:up|hsa:26167,PCDHB5,26167:up|hsa:56127,PCDHB9,56127:up	http://amigo.geneontology.org/cgi-bin/amigo/term_details?term=GO:0016339
regulation of endothelial cell differentiation	Biological Process	GO:0045601	5	27	1438	17840	0.00347705146036161	0.00151345291479821	6.163125e-02	0.6731420	hsa:7122,CLDN5,7122:down|hsa:652,BMP4,652:down|hsa:6093,ROCK1,6093:up|hsa:9475,ROCK2,9475:up|hsa:1903,S1PR3,1903:up	http://amigo.geneontology.org/cgi-bin/amigo/term_details?term=GO:0045601
nucleic acid-templated transcription	Biological Process	GO:0097659	313	3597	1438	17840	0.217663421418637	0.201625560538117	6.190081e-02	0.6731420	hsa:90,ACVR1,90:up|hsa:1950,EGF,1950:up|hsa:4869,NPM1,4869:up|hsa:65056,GPBP1,65056:up|hsa:6596,HLTF,6596:up|hsa:170622,COMMD6,170622:up|hsa:26053,AUTS2,26053:up|hsa:56924,PAK6,56924:down|hsa:440400,RNASEK,440400:up|hsa:7752,ZNF200,7752:up|hsa:3479,IGF1,3479:down|hsa:7707,ZNF148,7707:up|hsa:1408,CRY2,1408:down|hsa:92552,ATXN3L,92552:down|hsa:1786,DNMT1,1786:up|hsa:27332,ZNF638,27332:up|hsa:6787,N…	http://amigo.geneontology.org/cgi-bin/amigo/term_details?term=GO:0097659
cardiac conduction	Biological Process	GO:0061337	16	131	1438	17840	0.0111265646731572	0.00734304932735426	6.198527e-02	0.6731420	hsa:10142,AKAP9,10142:up|hsa:3728,JUP,3728:down|hsa:3759,KCNJ2,3759:down|hsa:157378,TMEM65,157378:up|hsa:4878,NPPA,4878:up|hsa:4882,NPR2,4882:down|hsa:3757,KCNH2,3757:up|hsa:10021,HCN4,10021:up|hsa:487,ATP2A1,487:up|hsa:1824,DSC2,1824:up|hsa:3750,KCND1,3750:up|hsa:1829,DSG2,1829:up|hsa:7220,TRPC1,7220:up|hsa:6548,SLC9A1,6548:down|hsa:51086,TNNI3K,51086:down|hsa:5144,PDE4D,5144:down	http://amigo.geneontology.org/cgi-bin/amigo/term_details?term=GO:0061337
negative regulation of angiogenesis	Biological Process	GO:0016525	10	72	1438	17840	0.00695410292072323	0.00403587443946188	6.239597e-02	0.6731420	hsa:79812,MMRN2,79812:down|hsa:7060,THBS4,7060:up|hsa:9314,KLF4,9314:down|hsa:3202,HOXA5,3202:down|hsa:5054,SERPINE1,5054:up|hsa:154,ADRB2,154:down|hsa:6093,ROCK1,6093:up|hsa:154796,AMOT,154796:down|hsa:9475,ROCK2,9475:up|hsa:2296,FOXC1,2296:up	http://amigo.geneontology.org/cgi-bin/amigo/term_details?term=GO:0016525
positive regulation of macromolecule biosynthetic process	Biological Process	GO:0010557	149	1641	1438	17840	0.103616133518776	0.0919843049327354	6.298915e-02	0.6731420	hsa:892,CCNC,892:up|hsa:90,ACVR1,90:up|hsa:546,ATRX,546:up|hsa:1950,EGF,1950:up|hsa:10974,ADIRF,10974:down|hsa:4869,NPM1,4869:up|hsa:65056,GPBP1,65056:up|hsa:6596,HLTF,6596:up|hsa:2535,FZD2,2535:up|hsa:1390,CREM,1390:up|hsa:26053,AUTS2,26053:up|hsa:84662,GLIS2,84662:up|hsa:3479,IGF1,3479:down|hsa:7984,ARHGEF5,7984:down|hsa:7707,ZNF148,7707:up|hsa:2115,ETV1,2115:up|hsa:163081,ZNF567,163081:up|hsa:…	http://amigo.geneontology.org/cgi-bin/amigo/term_details?term=GO:0010557
heart process	Biological Process	GO:0003015	28	257	1438	17840	0.019471488178025	0.0144058295964126	6.327465e-02	0.6731420	hsa:10142,AKAP9,10142:up|hsa:3728,JUP,3728:down|hsa:70,ACTC1,70:down|hsa:3759,KCNJ2,3759:down|hsa:157378,TMEM65,157378:up|hsa:4878,NPPA,4878:up|hsa:4882,NPR2,4882:down|hsa:1573,CYP2J2,1573:down|hsa:7135,TNNI1,7135:up|hsa:154,ADRB2,154:down|hsa:10021,HCN4,10021:up|hsa:3757,KCNH2,3757:up|hsa:487,ATP2A1,487:up|hsa:1113,CHGA,1113:up|hsa:84525,HOPX,84525:down|hsa:7852,CXCR4,7852:up|hsa:3750,KCND1,3750…	http://amigo.geneontology.org/cgi-bin/amigo/term_details?term=GO:0003015
DNA packaging	Biological Process	GO:0006323	21	183	1438	17840	0.0146036161335188	0.0102578475336323	6.363718e-02	0.6731420	hsa:546,ATRX,546:up|hsa:6662,SOX9,6662:up|hsa:54069,MIS18A,54069:up|hsa:4869,NPM1,4869:up|hsa:64105,CENPK,64105:up|hsa:51773,RSF1,51773:up|hsa:10592,SMC2,10592:up|hsa:891,CCNB1,891:up|hsa:55320,MIS18BP1,55320:up|hsa:440689,HIST2H2BF,440689:up|hsa:7153,TOP2A,7153:up|hsa:7175,TPR,7175:up|hsa:3070,HELLS,3070:up|hsa:4673,NAP1L1,4673:up|hsa:113130,CDCA5,113130:up|hsa:23198,PSME4,23198:up|hsa:8467,SMAR…	http://amigo.geneontology.org/cgi-bin/amigo/term_details?term=GO:0006323
regulation of nucleic acid-templated transcription	Biological Process	GO:1903506	300	3445	1438	17840	0.208623087621697	0.193105381165919	6.521473e-02	0.6731420	hsa:90,ACVR1,90:up|hsa:1950,EGF,1950:up|hsa:4869,NPM1,4869:up|hsa:65056,GPBP1,65056:up|hsa:6596,HLTF,6596:up|hsa:170622,COMMD6,170622:up|hsa:26053,AUTS2,26053:up|hsa:56924,PAK6,56924:down|hsa:7752,ZNF200,7752:up|hsa:3479,IGF1,3479:down|hsa:7707,ZNF148,7707:up|hsa:1408,CRY2,1408:down|hsa:92552,ATXN3L,92552:down|hsa:1786,DNMT1,1786:up|hsa:27332,ZNF638,27332:up|hsa:6787,NEK4,6787:up|hsa:222546,RFX6,…	http://amigo.geneontology.org/cgi-bin/amigo/term_details?term=GO:1903506
positive regulation of glucose metabolic process	Biological Process	GO:0010907	6	36	1438	17840	0.00417246175243394	0.00201793721973094	6.580805e-02	0.6731420	hsa:5771,PTPN2,5771:up|hsa:9852,EPM2AIP1,9852:up|hsa:10776,ARPP19,10776:up|hsa:5366,PMAIP1,5366:up|hsa:3479,IGF1,3479:down|hsa:2822,GPLD1,2822:down	http://amigo.geneontology.org/cgi-bin/amigo/term_details?term=GO:0010907
positive regulation of heart contraction	Biological Process	GO:0045823	6	36	1438	17840	0.00417246175243394	0.00201793721973094	6.580805e-02	0.6731420	hsa:154,ADRB2,154:down|hsa:5144,PDE4D,5144:down|hsa:3320,HSP90AA1,3320:up|hsa:7168,TPM1,7168:up|hsa:4878,NPPA,4878:up|hsa:1113,CHGA,1113:up	http://amigo.geneontology.org/cgi-bin/amigo/term_details?term=GO:0045823
camera-type eye morphogenesis	Biological Process	GO:0048593	13	102	1438	17840	0.0090403337969402	0.00571748878923767	6.607752e-02	0.6731420	hsa:3091,HIF1A,3091:up|hsa:28996,HIPK2,28996:up|hsa:220,ALDH1A3,220:up|hsa:6662,SOX9,6662:up|hsa:4040,LRP6,4040:up|hsa:6247,RS1,6247:down|hsa:64220,STRA6,64220:up|hsa:652,BMP4,652:down|hsa:2047,EPHB1,2047:down|hsa:4211,MEIS1,4211:up|hsa:25987,TSKU,25987:up|hsa:7482,WNT2B,7482:down|hsa:7474,WNT5A,7474:up	http://amigo.geneontology.org/cgi-bin/amigo/term_details?term=GO:0048593
kinetochore assembly	Biological Process	GO:0051382	3	12	1438	17840	0.00208623087621697	0.000672645739910314	6.634614e-02	0.6731420	hsa:1062,CENPE,1062:up|hsa:26054,SENP6,26054:up|hsa:1063,CENPF,1063:up	http://amigo.geneontology.org/cgi-bin/amigo/term_details?term=GO:0051382
regulation of thymocyte apoptotic process	Biological Process	GO:0070243	3	12	1438	17840	0.00208623087621697	0.000672645739910314	6.634614e-02	0.6731420	hsa:652,BMP4,652:down|hsa:3091,HIF1A,3091:up|hsa:7474,WNT5A,7474:up	http://amigo.geneontology.org/cgi-bin/amigo/term_details?term=GO:0070243
embryonic camera-type eye formation	Biological Process	GO:0060900	3	12	1438	17840	0.00208623087621697	0.000672645739910314	6.634614e-02	0.6731420	hsa:64220,STRA6,64220:up|hsa:220,ALDH1A3,220:up|hsa:7474,WNT5A,7474:up	http://amigo.geneontology.org/cgi-bin/amigo/term_details?term=GO:0060900
mechanosensory behavior	Biological Process	GO:0007638	3	12	1438	17840	0.00208623087621697	0.000672645739910314	6.634614e-02	0.6731420	hsa:64220,STRA6,64220:up|hsa:9378,NRXN1,9378:down|hsa:2115,ETV1,2115:up	http://amigo.geneontology.org/cgi-bin/amigo/term_details?term=GO:0007638
cellular response to cholesterol	Biological Process	GO:0071397	3	12	1438	17840	0.00208623087621697	0.000672645739910314	6.634614e-02	0.6731420	hsa:4040,LRP6,4040:up|hsa:114881,OSBPL7,114881:up|hsa:2822,GPLD1,2822:down	http://amigo.geneontology.org/cgi-bin/amigo/term_details?term=GO:0071397
lateral sprouting from an epithelium	Biological Process	GO:0060601	3	12	1438	17840	0.00208623087621697	0.000672645739910314	6.634614e-02	0.6731420	hsa:652,BMP4,652:down|hsa:57216,VANGL2,57216:up|hsa:7474,WNT5A,7474:up	http://amigo.geneontology.org/cgi-bin/amigo/term_details?term=GO:0060601
positive regulation of DNA damage response, signal transduction by p53 class mediator	Biological Process	GO:0043517	3	12	1438	17840	0.00208623087621697	0.000672645739910314	6.634614e-02	0.6731420	hsa:545,ATR,545:up|hsa:5366,PMAIP1,5366:up|hsa:9521,EEF1E1,9521:up	http://amigo.geneontology.org/cgi-bin/amigo/term_details?term=GO:0043517
trachea morphogenesis	Biological Process	GO:0060439	3	12	1438	17840	0.00208623087621697	0.000672645739910314	6.634614e-02	0.6731420	hsa:4040,LRP6,4040:up|hsa:652,BMP4,652:down|hsa:3202,HOXA5,3202:down	http://amigo.geneontology.org/cgi-bin/amigo/term_details?term=GO:0060439
positive regulation of cardiac muscle contraction	Biological Process	GO:0060452	3	12	1438	17840	0.00208623087621697	0.000672645739910314	6.634614e-02	0.6731420	hsa:3320,HSP90AA1,3320:up|hsa:4878,NPPA,4878:up|hsa:1113,CHGA,1113:up	http://amigo.geneontology.org/cgi-bin/amigo/term_details?term=GO:0060452
apical protein localization	Biological Process	GO:0045176	3	12	1438	17840	0.00208623087621697	0.000672645739910314	6.634614e-02	0.6731420	hsa:57216,VANGL2,57216:up|hsa:57120,GOPC,57120:up|hsa:378,ARF4,378:up	http://amigo.geneontology.org/cgi-bin/amigo/term_details?term=GO:0045176
mucus secretion	Biological Process	GO:0070254	3	12	1438	17840	0.00208623087621697	0.000672645739910314	6.634614e-02	0.6731420	hsa:9474,ATG5,9474:up|hsa:1535,CYBA,1535:up|hsa:5734,PTGER4,5734:up	http://amigo.geneontology.org/cgi-bin/amigo/term_details?term=GO:0070254
activation of transmembrane receptor protein tyrosine kinase activity	Biological Process	GO:0007171	3	12	1438	17840	0.00208623087621697	0.000672645739910314	6.634614e-02	0.6731420	hsa:26585,GREM1,26585:down|hsa:154,ADRB2,154:down|hsa:1950,EGF,1950:up	http://amigo.geneontology.org/cgi-bin/amigo/term_details?term=GO:0007171
cartilage morphogenesis	Biological Process	GO:0060536	3	12	1438	17840	0.00208623087621697	0.000672645739910314	6.634614e-02	0.6731420	hsa:4040,LRP6,4040:up|hsa:6781,STC1,6781:up|hsa:3202,HOXA5,3202:down	http://amigo.geneontology.org/cgi-bin/amigo/term_details?term=GO:0060536
positive regulation of neurotransmitter secretion	Biological Process	GO:0001956	3	12	1438	17840	0.00208623087621697	0.000672645739910314	6.634614e-02	0.6731420	hsa:112755,STX1B,112755:up|hsa:6804,STX1A,6804:up|hsa:5734,PTGER4,5734:up	http://amigo.geneontology.org/cgi-bin/amigo/term_details?term=GO:0001956
heterochromatin organization	Biological Process	GO:0070828	3	12	1438	17840	0.00208623087621697	0.000672645739910314	6.634614e-02	0.6731420	hsa:3070,HELLS,3070:up|hsa:7175,TPR,7175:up|hsa:1029,CDKN2A,1029:up	http://amigo.geneontology.org/cgi-bin/amigo/term_details?term=GO:0070828
response to cold	Biological Process	GO:0009409	7	45	1438	17840	0.00486787204450626	0.00252242152466368	6.690045e-02	0.6731420	hsa:51316,PLAC8,51316:up|hsa:154,ADRB2,154:down|hsa:3320,HSP90AA1,3320:up|hsa:841,CASP8,841:up|hsa:3306,HSPA2,3306:down|hsa:26027,ACOT11,26027:up|hsa:9451,EIF2AK3,9451:up	http://amigo.geneontology.org/cgi-bin/amigo/term_details?term=GO:0009409
intrinsic apoptotic signaling pathway in response to oxidative stress	Biological Process	GO:0008631	7	45	1438	17840	0.00486787204450626	0.00252242152466368	6.690045e-02	0.6731420	hsa:5625,PRODH,5625:down|hsa:10808,HSPH1,10808:up|hsa:3717,JAK2,3717:up|hsa:55294,FBXW7,55294:down|hsa:3091,HIF1A,3091:up|hsa:10550,ARL6IP5,10550:up|hsa:4137,MAPT,4137:down	http://amigo.geneontology.org/cgi-bin/amigo/term_details?term=GO:0008631
negative regulation of lipid biosynthetic process	Biological Process	GO:0051055	7	45	1438	17840	0.00486787204450626	0.00252242152466368	6.690045e-02	0.6731420	hsa:33,ACADL,33:down|hsa:55294,FBXW7,55294:down|hsa:51141,INSIG2,51141:up|hsa:672,BRCA1,672:up|hsa:79888,LPCAT1,79888:up|hsa:145264,SERPINA12,145264:down|hsa:11160,ERLIN2,11160:up	http://amigo.geneontology.org/cgi-bin/amigo/term_details?term=GO:0051055
ATP-dependent chromatin remodeling	Biological Process	GO:0043044	10	73	1438	17840	0.00695410292072323	0.00409192825112108	6.732684e-02	0.6731420	hsa:54069,MIS18A,54069:up|hsa:23198,PSME4,23198:up|hsa:4869,NPM1,4869:up|hsa:64105,CENPK,64105:up|hsa:51773,RSF1,51773:up|hsa:5928,RBBP4,5928:up|hsa:8467,SMARCA5,8467:up|hsa:378708,APITD1,378708:up|hsa:55320,MIS18BP1,55320:up|hsa:3066,HDAC2,3066:up	http://amigo.geneontology.org/cgi-bin/amigo/term_details?term=GO:0043044
regulation of protein localization to nucleus	Biological Process	GO:1900180	24	216	1438	17840	0.0166898470097357	0.0121076233183857	6.767883e-02	0.6731420	hsa:10576,CCT2,10576:up|hsa:26585,GREM1,26585:down|hsa:3728,JUP,3728:down|hsa:114899,C1QTNF3,114899:down|hsa:1950,EGF,1950:up|hsa:3843,IPO5,3843:up|hsa:9451,EIF2AK3,9451:up|hsa:9516,LITAF,9516:up|hsa:5532,PPP3CB,5532:up|hsa:672,BRCA1,672:up|hsa:22948,CCT5,22948:up|hsa:7097,TLR2,7097:up|hsa:7175,TPR,7175:up|hsa:6950,TCP1,6950:up|hsa:10913,EDAR,10913:up|hsa:23607,CD2AP,23607:up|hsa:3479,IGF1,3479:d…	http://amigo.geneontology.org/cgi-bin/amigo/term_details?term=GO:1900180
regulation of biosynthetic process	Biological Process	GO:0009889	357	4138	1438	17840	0.248261474269819	0.23195067264574	6.811894e-02	0.6731420	hsa:90,ACVR1,90:up|hsa:1950,EGF,1950:up|hsa:4869,NPM1,4869:up|hsa:65056,GPBP1,65056:up|hsa:6596,HLTF,6596:up|hsa:170622,COMMD6,170622:up|hsa:26053,AUTS2,26053:up|hsa:56924,PAK6,56924:down|hsa:7752,ZNF200,7752:up|hsa:3479,IGF1,3479:down|hsa:7707,ZNF148,7707:up|hsa:1408,CRY2,1408:down|hsa:92552,ATXN3L,92552:down|hsa:1786,DNMT1,1786:up|hsa:27332,ZNF638,27332:up|hsa:6787,NEK4,6787:up|hsa:222546,RFX6,…	http://amigo.geneontology.org/cgi-bin/amigo/term_details?term=GO:0009889
gamete generation	Biological Process	GO:0007276	57	580	1438	17840	0.0396383866481224	0.0325112107623318	6.828654e-02	0.6731420	hsa:90,ACVR1,90:up|hsa:546,ATRX,546:up|hsa:85315,PAQR8,85315:up|hsa:1508,CTSB,1508:up|hsa:4142,MAS1,4142:down|hsa:4882,NPR2,4882:down|hsa:638,BIK,638:up|hsa:6662,SOX9,6662:up|hsa:64395,GMCL1,64395:up|hsa:30014,SPANXA1,30014:down|hsa:891,CCNB1,891:up|hsa:84690,SPATA22,84690:down|hsa:338,APOB,338:down|hsa:254394,MCM9,254394:down|hsa:55329,MNS1,55329:up|hsa:1390,CREM,1390:up|hsa:3206,HOXA10,3206:dow…	http://amigo.geneontology.org/cgi-bin/amigo/term_details?term=GO:0007276
regulation of transcription, DNA-templated	Biological Process	GO:0006355	298	3426	1438	17840	0.207232267037552	0.192040358744395	6.898791e-02	0.6731420	hsa:90,ACVR1,90:up|hsa:1950,EGF,1950:up|hsa:4869,NPM1,4869:up|hsa:65056,GPBP1,65056:up|hsa:6596,HLTF,6596:up|hsa:170622,COMMD6,170622:up|hsa:26053,AUTS2,26053:up|hsa:56924,PAK6,56924:down|hsa:7752,ZNF200,7752:up|hsa:3479,IGF1,3479:down|hsa:7707,ZNF148,7707:up|hsa:1408,CRY2,1408:down|hsa:92552,ATXN3L,92552:down|hsa:1786,DNMT1,1786:up|hsa:27332,ZNF638,27332:up|hsa:6787,NEK4,6787:up|hsa:222546,RFX6,…	http://amigo.geneontology.org/cgi-bin/amigo/term_details?term=GO:0006355
positive regulation of ossification	Biological Process	GO:0045778	11	83	1438	17840	0.00764951321279555	0.004652466367713	6.901951e-02	0.6731420	hsa:56998,CTNNBIP1,56998:down|hsa:860,RUNX2,860:up|hsa:90,ACVR1,90:up|hsa:659,BMPR2,659:up|hsa:5734,PTGER4,5734:up|hsa:51430,SUCO,51430:up|hsa:3479,IGF1,3479:down|hsa:91461,PKDCC,91461:down|hsa:652,BMP4,652:down|hsa:154,ADRB2,154:down|hsa:7474,WNT5A,7474:up	http://amigo.geneontology.org/cgi-bin/amigo/term_details?term=GO:0045778
multicellular organismal signaling	Biological Process	GO:0035637	21	185	1438	17840	0.0146036161335188	0.0103699551569507	6.972161e-02	0.6731420	hsa:10142,AKAP9,10142:up|hsa:3728,JUP,3728:down|hsa:3759,KCNJ2,3759:down|hsa:157378,TMEM65,157378:up|hsa:6334,SCN8A,6334:up|hsa:4878,NPPA,4878:up|hsa:4882,NPR2,4882:down|hsa:10021,HCN4,10021:up|hsa:3757,KCNH2,3757:up|hsa:1134,CHRNA1,1134:up|hsa:487,ATP2A1,487:up|hsa:3750,KCND1,3750:up|hsa:1824,DSC2,1824:up|hsa:1829,DSG2,1829:up|hsa:27094,KCNMB3,27094:up|hsa:6548,SLC9A1,6548:down|hsa:7220,TRPC1,72…	http://amigo.geneontology.org/cgi-bin/amigo/term_details?term=GO:0035637
meiotic chromosome segregation	Biological Process	GO:0045132	9	64	1438	17840	0.0062586926286509	0.00358744394618834	7.007038e-02	0.6731420	hsa:7153,TOP2A,7153:up|hsa:675,BRCA2,675:up|hsa:151246,SGO2,151246:up|hsa:642636,RAD21L1,642636:down|hsa:7155,TOP2B,7155:up|hsa:10592,SMC2,10592:up|hsa:84690,SPATA22,84690:down|hsa:378708,APITD1,378708:up|hsa:10051,SMC4,10051:up	http://amigo.geneontology.org/cgi-bin/amigo/term_details?term=GO:0045132
epithelial tube branching involved in lung morphogenesis	Biological Process	GO:0060441	5	28	1438	17840	0.00347705146036161	0.0015695067264574	7.026349e-02	0.6731420	hsa:652,BMP4,652:down|hsa:57216,VANGL2,57216:up|hsa:3202,HOXA5,3202:down|hsa:6662,SOX9,6662:up|hsa:7482,WNT2B,7482:down	http://amigo.geneontology.org/cgi-bin/amigo/term_details?term=GO:0060441
positive regulation of telomerase activity	Biological Process	GO:0051973	5	28	1438	17840	0.00347705146036161	0.0015695067264574	7.026349e-02	0.6731420	hsa:10576,CCT2,10576:up|hsa:26585,GREM1,26585:down|hsa:6950,TCP1,6950:up|hsa:9314,KLF4,9314:down|hsa:4751,NEK2,4751:down	http://amigo.geneontology.org/cgi-bin/amigo/term_details?term=GO:0051973
protein localization	Biological Process	GO:0008104	211	2384	1438	17840	0.14673157162726	0.133632286995516	7.040587e-02	0.6731420	hsa:23086,EXPH5,23086:down|hsa:4052,LTBP1,4052:up|hsa:11116,FGFR1OP,11116:up|hsa:23390,ZDHHC17,23390:up|hsa:10527,IPO7,10527:up|hsa:546,ATRX,546:up|hsa:27242,TNFRSF21,27242:up|hsa:1950,EGF,1950:up|hsa:10403,NDC80,10403:up|hsa:112609,MRAP2,112609:up|hsa:4869,NPM1,4869:up|hsa:2266,FGG,2266:down|hsa:18,ABAT,18:up|hsa:891,CCNB1,891:up|hsa:338322,NLRP10,338322:down|hsa:23225,NUP210,23225:up|hsa:23607,…	http://amigo.geneontology.org/cgi-bin/amigo/term_details?term=GO:0008104
nucleobase-containing compound metabolic process	Biological Process	GO:0006139	469	5505	1438	17840	0.326147426981919	0.308576233183857	7.063415e-02	0.6731420	hsa:90,ACVR1,90:up|hsa:57505,AARS2,57505:up|hsa:1950,EGF,1950:up|hsa:4869,NPM1,4869:up|hsa:65056,GPBP1,65056:up|hsa:6596,HLTF,6596:up|hsa:891,CCNB1,891:up|hsa:4338,MOCS2,4338:up|hsa:170622,COMMD6,170622:up|hsa:26053,AUTS2,26053:up|hsa:56924,PAK6,56924:down|hsa:440400,RNASEK,440400:up|hsa:7752,ZNF200,7752:up|hsa:3479,IGF1,3479:down|hsa:7707,ZNF148,7707:up|hsa:1408,CRY2,1408:down|hsa:1836,SLC26A2,1…	http://amigo.geneontology.org/cgi-bin/amigo/term_details?term=GO:0006139
regulation of organelle organization	Biological Process	GO:0033043	111	1203	1438	17840	0.0771905424200278	0.067432735426009	7.086603e-02	0.6731420	hsa:6712,SPTBN2,6712:down|hsa:10602,CDC42EP3,10602:up|hsa:92170,MTG1,92170:up|hsa:685,BTC,685:down|hsa:9637,FEZ2,9637:up|hsa:8936,WASF1,8936:up|hsa:546,ATRX,546:up|hsa:1950,EGF,1950:up|hsa:25802,LMOD1,25802:down|hsa:50810,HDGFRP3,50810:up|hsa:4869,NPM1,4869:up|hsa:90167,FRMD7,90167:down|hsa:891,CCNB1,891:up|hsa:3925,STMN1,3925:up|hsa:637,BID,637:up|hsa:55329,MNS1,55329:up|hsa:9715,FAM131B,9715:up…	http://amigo.geneontology.org/cgi-bin/amigo/term_details?term=GO:0033043
adenylate cyclase-activating adrenergic receptor signaling pathway	Biological Process	GO:0071880	4	20	1438	17840	0.00278164116828929	0.00112107623318386	7.209804e-02	0.6731420	hsa:154,ADRB2,154:down|hsa:5144,PDE4D,5144:down|hsa:120796,OR56A1,120796:down|hsa:1113,CHGA,1113:up	http://amigo.geneontology.org/cgi-bin/amigo/term_details?term=GO:0071880
negative regulation of macroautophagy	Biological Process	GO:0016242	4	20	1438	17840	0.00278164116828929	0.00112107623318386	7.209804e-02	0.6731420	hsa:9637,FEZ2,9637:up|hsa:57103,TIGAR,57103:up|hsa:79142,PHF23,79142:up|hsa:11178,LZTS1,11178:up	http://amigo.geneontology.org/cgi-bin/amigo/term_details?term=GO:0016242
trachea development	Biological Process	GO:0060438	4	20	1438	17840	0.00278164116828929	0.00112107623318386	7.209804e-02	0.6731420	hsa:4040,LRP6,4040:up|hsa:652,BMP4,652:down|hsa:3202,HOXA5,3202:down|hsa:6662,SOX9,6662:up	http://amigo.geneontology.org/cgi-bin/amigo/term_details?term=GO:0060438
negative regulation of chondrocyte differentiation	Biological Process	GO:0032331	4	20	1438	17840	0.00278164116828929	0.00112107623318386	7.209804e-02	0.6731420	hsa:26585,GREM1,26585:down|hsa:652,BMP4,652:down|hsa:359845,FAM101B,359845:up|hsa:6662,SOX9,6662:up	http://amigo.geneontology.org/cgi-bin/amigo/term_details?term=GO:0032331
Sertoli cell differentiation	Biological Process	GO:0060008	4	20	1438	17840	0.00278164116828929	0.00112107623318386	7.209804e-02	0.6731420	hsa:51742,ARID4B,51742:up|hsa:546,ATRX,546:up|hsa:6662,SOX9,6662:up|hsa:1515,CTSV,1515:up	http://amigo.geneontology.org/cgi-bin/amigo/term_details?term=GO:0060008
negative regulation of protein tyrosine kinase activity	Biological Process	GO:0061099	4	20	1438	17840	0.00278164116828929	0.00112107623318386	7.209804e-02	0.6731420	hsa:5771,PTPN2,5771:up|hsa:11116,FGFR1OP,11116:up|hsa:25998,IBTK,25998:up|hsa:122809,SOCS4,122809:up	http://amigo.geneontology.org/cgi-bin/amigo/term_details?term=GO:0061099
positive regulation of tumor necrosis factor production	Biological Process	GO:0032760	8	55	1438	17840	0.00556328233657858	0.00308295964125561	7.232263e-02	0.6731420	hsa:7097,TLR2,7097:up|hsa:1535,CYBA,1535:up|hsa:64170,CARD9,64170:up|hsa:148022,TICAM1,148022:down|hsa:3717,JAK2,3717:up|hsa:23643,LY96,23643:up|hsa:7096,TLR1,7096:up|hsa:3066,HDAC2,3066:up	http://amigo.geneontology.org/cgi-bin/amigo/term_details?term=GO:0032760
regulation of plasma lipoprotein particle levels	Biological Process	GO:0097006	8	55	1438	17840	0.00556328233657858	0.00308295964125561	7.232263e-02	0.6731420	hsa:4547,MTTP,4547:down|hsa:10330,CNPY2,10330:up|hsa:8435,SOAT2,8435:up|hsa:2181,ACSL3,2181:up|hsa:4040,LRP6,4040:up|hsa:9388,LIPG,9388:up|hsa:338,APOB,338:down|hsa:2822,GPLD1,2822:down	http://amigo.geneontology.org/cgi-bin/amigo/term_details?term=GO:0097006
insulin secretion involved in cellular response to glucose stimulus	Biological Process	GO:0035773	8	55	1438	17840	0.00556328233657858	0.00308295964125561	7.232263e-02	0.6731420	hsa:222546,RFX6,222546:down|hsa:3091,HIF1A,3091:up|hsa:7447,VSNL1,7447:up|hsa:5532,PPP3CB,5532:up|hsa:9378,NRXN1,9378:down|hsa:9572,NR1D1,9572:down|hsa:252983,STXBP4,252983:up|hsa:2822,GPLD1,2822:down	http://amigo.geneontology.org/cgi-bin/amigo/term_details?term=GO:0035773
positive regulation of protein secretion	Biological Process	GO:0050714	23	207	1438	17840	0.0159944367176634	0.0116031390134529	7.242185e-02	0.6731420	hsa:23086,EXPH5,23086:down|hsa:10802,SEC24A,10802:up|hsa:26253,CLEC4E,26253:down|hsa:114899,C1QTNF3,114899:down|hsa:222546,RFX6,222546:down|hsa:5734,PTGER4,5734:up|hsa:7447,VSNL1,7447:up|hsa:2266,FGG,2266:down|hsa:5532,PPP3CB,5532:up|hsa:18,ABAT,18:up|hsa:338322,NLRP10,338322:down|hsa:5213,PFKM,5213:up|hsa:24145,PANX1,24145:up|hsa:7474,WNT5A,7474:up|hsa:2822,GPLD1,2822:down|hsa:55540,IL17RB,55540…	http://amigo.geneontology.org/cgi-bin/amigo/term_details?term=GO:0050714
toxin transport	Biological Process	GO:1901998	6	37	1438	17840	0.00417246175243394	0.00207399103139013	7.343665e-02	0.6731420	hsa:22948,CCT5,22948:up|hsa:4040,LRP6,4040:up|hsa:10576,CCT2,10576:up|hsa:3301,DNAJA1,3301:up|hsa:6950,TCP1,6950:up|hsa:339122,RAB43,339122:up	http://amigo.geneontology.org/cgi-bin/amigo/term_details?term=GO:1901998
positive regulation of potassium ion transport	Biological Process	GO:0043268	6	37	1438	17840	0.00417246175243394	0.00207399103139013	7.343665e-02	0.6731420	hsa:3799,KIF5B,3799:up|hsa:10142,AKAP9,10142:up|hsa:154,ADRB2,154:down|hsa:3757,KCNH2,3757:up|hsa:3759,KCNJ2,3759:down|hsa:4878,NPPA,4878:up	http://amigo.geneontology.org/cgi-bin/amigo/term_details?term=GO:0043268
regulation of nucleocytoplasmic transport	Biological Process	GO:0046822	24	218	1438	17840	0.0166898470097357	0.012219730941704	7.349959e-02	0.6731420	hsa:26585,GREM1,26585:down|hsa:3728,JUP,3728:down|hsa:114899,C1QTNF3,114899:down|hsa:4659,PPP1R12A,4659:up|hsa:11163,NUDT4,11163:up|hsa:1950,EGF,1950:up|hsa:3843,IPO5,3843:up|hsa:9516,LITAF,9516:up|hsa:5532,PPP3CB,5532:up|hsa:672,BRCA1,672:up|hsa:55677,IWS1,55677:up|hsa:7097,TLR2,7097:up|hsa:7175,TPR,7175:up|hsa:7514,XPO1,7514:up|hsa:10913,EDAR,10913:up|hsa:3479,IGF1,3479:down|hsa:6548,SLC9A1,654…	http://amigo.geneontology.org/cgi-bin/amigo/term_details?term=GO:0046822
oocyte differentiation	Biological Process	GO:0009994	7	46	1438	17840	0.00486787204450626	0.00257847533632287	7.368074e-02	0.6731420	hsa:675,BRCA2,675:up|hsa:891,CCNB1,891:up|hsa:283,ANG,283:down|hsa:4882,NPR2,4882:down|hsa:668,FOXL2,668:up|hsa:2069,EREG,2069:down|hsa:3479,IGF1,3479:down	http://amigo.geneontology.org/cgi-bin/amigo/term_details?term=GO:0009994
positive regulation of telomere maintenance	Biological Process	GO:0032206	7	46	1438	17840	0.00486787204450626	0.00257847533632287	7.368074e-02	0.6731420	hsa:22948,CCT5,22948:up|hsa:10576,CCT2,10576:up|hsa:545,ATR,545:up|hsa:6950,TCP1,6950:up|hsa:546,ATRX,546:up|hsa:10111,RAD50,10111:up|hsa:4751,NEK2,4751:down	http://amigo.geneontology.org/cgi-bin/amigo/term_details?term=GO:0032206
regulation of phosphatase activity	Biological Process	GO:0010921	15	124	1438	17840	0.0104311543810848	0.00695067264573991	7.380368e-02	0.6731420	hsa:84365,NIFK,84365:up|hsa:57662,CAMSAP3,57662:down|hsa:163882,CNST,163882:down|hsa:10199,MPHOSPH10,10199:up|hsa:7184,HSP90B1,7184:up|hsa:4659,PPP1R12A,4659:up|hsa:55105,GPATCH2,55105:up|hsa:1740,DLG2,1740:down|hsa:1408,CRY2,1408:down|hsa:3717,JAK2,3717:up|hsa:6093,ROCK1,6093:up|hsa:10776,ARPP19,10776:up|hsa:9475,ROCK2,9475:up|hsa:63928,CHP2,63928:down|hsa:2822,GPLD1,2822:down	http://amigo.geneontology.org/cgi-bin/amigo/term_details?term=GO:0010921
establishment of cell polarity	Biological Process	GO:0030010	13	104	1438	17840	0.0090403337969402	0.00582959641255605	7.472023e-02	0.6731420	hsa:143098,MPP7,143098:down|hsa:6624,FSCN1,6624:up|hsa:6993,DYNLT1,6993:up|hsa:10806,SDCCAG8,10806:up|hsa:5584,PRKCI,5584:up|hsa:10403,NDC80,10403:up|hsa:388585,HES5,388585:down|hsa:9585,KIF20B,9585:up|hsa:6093,ROCK1,6093:up|hsa:2047,EPHB1,2047:down|hsa:154796,AMOT,154796:down|hsa:9475,ROCK2,9475:up|hsa:7474,WNT5A,7474:up	http://amigo.geneontology.org/cgi-bin/amigo/term_details?term=GO:0030010
regulation of protein transport	Biological Process	GO:0051223	72	755	1438	17840	0.0500695410292072	0.0423206278026906	7.543982e-02	0.6731420	hsa:23086,EXPH5,23086:down|hsa:26253,CLEC4E,26253:down|hsa:27242,TNFRSF21,27242:up|hsa:1950,EGF,1950:up|hsa:2266,FGG,2266:down|hsa:18,ABAT,18:up|hsa:9378,NRXN1,9378:down|hsa:338322,NLRP10,338322:down|hsa:7474,WNT5A,7474:up|hsa:8651,SOCS1,8651:up|hsa:3479,IGF1,3479:down|hsa:7984,ARHGEF5,7984:down|hsa:55294,FBXW7,55294:down|hsa:81573,ANKRD13C,81573:up|hsa:51706,CYB5R1,51706:down|hsa:9572,NR1D1,9572…	http://amigo.geneontology.org/cgi-bin/amigo/term_details?term=GO:0051223
cell-cell adhesion via plasma-membrane adhesion molecules	Biological Process	GO:0098742	23	208	1438	17840	0.0159944367176634	0.0116591928251121	7.550795e-02	0.6731420	hsa:81607,NECTIN4,81607:down|hsa:57717,PCDHB16,57717:up|hsa:1825,DSC3,1825:down|hsa:7122,CLDN5,7122:down|hsa:9746,CLSTN3,9746:up|hsa:5817,PVR,5817:up|hsa:137075,CLDN23,137075:down|hsa:10205,MPZL2,10205:up|hsa:56133,PCDHB2,56133:up|hsa:4345,CD200,4345:up|hsa:1009,CDH11,1009:up|hsa:214,ALCAM,214:up|hsa:10666,CD226,10666:up|hsa:92211,CDHR1,92211:down|hsa:56097,PCDHGC5,56097:up|hsa:1824,DSC2,1824:up|…	http://amigo.geneontology.org/cgi-bin/amigo/term_details?term=GO:0098742
regulation of cellular macromolecule biosynthetic process	Biological Process	GO:2000112	328	3797	1438	17840	0.228094575799722	0.212836322869955	7.562473e-02	0.6731420	hsa:90,ACVR1,90:up|hsa:1950,EGF,1950:up|hsa:4869,NPM1,4869:up|hsa:65056,GPBP1,65056:up|hsa:6596,HLTF,6596:up|hsa:170622,COMMD6,170622:up|hsa:26053,AUTS2,26053:up|hsa:56924,PAK6,56924:down|hsa:7752,ZNF200,7752:up|hsa:3479,IGF1,3479:down|hsa:7707,ZNF148,7707:up|hsa:1408,CRY2,1408:down|hsa:92552,ATXN3L,92552:down|hsa:1786,DNMT1,1786:up|hsa:27332,ZNF638,27332:up|hsa:6787,NEK4,6787:up|hsa:222546,RFX6,…	http://amigo.geneontology.org/cgi-bin/amigo/term_details?term=GO:2000112
response to ionizing radiation	Biological Process	GO:0010212	17	145	1438	17840	0.0118219749652295	0.00812780269058296	7.562856e-02	0.6731420	hsa:10206,TRIM13,10206:up|hsa:1410,CRYAB,1410:down|hsa:57646,USP28,57646:up|hsa:64421,DCLRE1C,64421:up|hsa:672,BRCA1,672:up|hsa:641,BLM,641:up|hsa:121457,IKBIP,121457:up|hsa:675,BRCA2,675:up|hsa:1535,CYBA,1535:up|hsa:57103,TIGAR,57103:up|hsa:5366,PMAIP1,5366:up|hsa:7158,TP53BP1,7158:up|hsa:3091,HIF1A,3091:up|hsa:64782,AEN,64782:up|hsa:545,ATR,545:up|hsa:7518,XRCC4,7518:up|hsa:1786,DNMT1,1786:up	http://amigo.geneontology.org/cgi-bin/amigo/term_details?term=GO:0010212
tissue development	Biological Process	GO:0009888	162	1807	1438	17840	0.112656467315716	0.101289237668161	7.576906e-02	0.6731420	hsa:23086,EXPH5,23086:down|hsa:90,ACVR1,90:up|hsa:546,ATRX,546:up|hsa:57545,CC2D2A,57545:up|hsa:1950,EGF,1950:up|hsa:26160,IFT172,26160:up|hsa:6247,RS1,6247:down|hsa:353139,LCE2A,353139:down|hsa:891,CCNB1,891:up|hsa:2535,FZD2,2535:up|hsa:359845,FAM101B,359845:up|hsa:7482,WNT2B,7482:down|hsa:220,ALDH1A3,220:up|hsa:3479,IGF1,3479:down|hsa:59277,NTN4,59277:up|hsa:6781,STC1,6781:up|hsa:9333,TGM5,9333…	http://amigo.geneontology.org/cgi-bin/amigo/term_details?term=GO:0009888
response to axon injury	Biological Process	GO:0048678	9	65	1438	17840	0.0062586926286509	0.00364349775784753	7.580354e-02	0.6731420	hsa:9314,KLF4,9314:down|hsa:4147,MATN2,4147:down|hsa:813,CALU,813:up|hsa:1719,DHFR,1719:up|hsa:9469,CHST3,9469:up|hsa:3717,JAK2,3717:up|hsa:3776,KCNK2,3776:up|hsa:4671,NAIP,4671:up|hsa:378,ARF4,378:up	http://amigo.geneontology.org/cgi-bin/amigo/term_details?term=GO:0048678
positive regulation of cellular carbohydrate metabolic process	Biological Process	GO:0010676	9	65	1438	17840	0.0062586926286509	0.00364349775784753	7.580354e-02	0.6731420	hsa:5771,PTPN2,5771:up|hsa:9852,EPM2AIP1,9852:up|hsa:57103,TIGAR,57103:up|hsa:5366,PMAIP1,5366:up|hsa:3091,HIF1A,3091:up|hsa:4142,MAS1,4142:down|hsa:3479,IGF1,3479:down|hsa:10776,ARPP19,10776:up|hsa:2822,GPLD1,2822:down	http://amigo.geneontology.org/cgi-bin/amigo/term_details?term=GO:0010676
cellular protein complex assembly	Biological Process	GO:0043623	52	528	1438	17840	0.0361613351877608	0.0295964125560538	7.634156e-02	0.6731420	hsa:6712,SPTBN2,6712:down|hsa:10602,CDC42EP3,10602:up|hsa:10142,AKAP9,10142:up|hsa:8936,WASF1,8936:up|hsa:1410,CRYAB,1410:down|hsa:7381,UQCRB,7381:up|hsa:29091,STXBP6,29091:down|hsa:57505,AARS2,57505:up|hsa:1063,CENPF,1063:up|hsa:1950,EGF,1950:up|hsa:25802,LMOD1,25802:down|hsa:3843,IPO5,3843:up|hsa:50810,HDGFRP3,50810:up|hsa:2266,FGG,2266:down|hsa:112755,STX1B,112755:up|hsa:161582,DYX1C1,161582:u…	http://amigo.geneontology.org/cgi-bin/amigo/term_details?term=GO:0043623
cellular response to hypoxia	Biological Process	GO:0071456	16	135	1438	17840	0.0111265646731572	0.00756726457399103	7.686374e-02	0.6731420	hsa:23409,SIRT4,23409:up|hsa:10525,HYOU1,10525:up|hsa:154,ADRB2,154:down|hsa:891,CCNB1,891:up|hsa:6095,RORA,6095:down|hsa:57103,TIGAR,57103:up|hsa:3091,HIF1A,3091:up|hsa:5366,PMAIP1,5366:up|hsa:28996,HIPK2,28996:up|hsa:10449,ACAA2,10449:up|hsa:7220,TRPC1,7220:up|hsa:6548,SLC9A1,6548:down|hsa:3776,KCNK2,3776:up|hsa:112399,EGLN3,112399:down|hsa:6781,STC1,6781:up|hsa:1179,CLCA1,1179:down	http://amigo.geneontology.org/cgi-bin/amigo/term_details?term=GO:0071456
camera-type eye development	Biological Process	GO:0043010	30	284	1438	17840	0.0208623087621697	0.0159192825112108	7.717934e-02	0.6731420	hsa:659,BMPR2,659:up|hsa:1410,CRYAB,1410:down|hsa:57545,CC2D2A,57545:up|hsa:10586,MAB21L2,10586:down|hsa:6662,SOX9,6662:up|hsa:4081,MAB21L1,4081:up|hsa:6247,RS1,6247:down|hsa:2047,EPHB1,2047:down|hsa:2296,FOXC1,2296:up|hsa:25987,TSKU,25987:up|hsa:7482,WNT2B,7482:down|hsa:7474,WNT5A,7474:up|hsa:9355,LHX2,9355:up|hsa:3091,HIF1A,3091:up|hsa:57045,TWSG1,57045:up|hsa:9314,KLF4,9314:down|hsa:28996,HIPK…	http://amigo.geneontology.org/cgi-bin/amigo/term_details?term=GO:0043010
regulation of RNA biosynthetic process	Biological Process	GO:2001141	300	3461	1438	17840	0.208623087621697	0.194002242152466	7.756884e-02	0.6731420	hsa:90,ACVR1,90:up|hsa:1950,EGF,1950:up|hsa:4869,NPM1,4869:up|hsa:65056,GPBP1,65056:up|hsa:6596,HLTF,6596:up|hsa:170622,COMMD6,170622:up|hsa:26053,AUTS2,26053:up|hsa:56924,PAK6,56924:down|hsa:7752,ZNF200,7752:up|hsa:3479,IGF1,3479:down|hsa:7707,ZNF148,7707:up|hsa:1408,CRY2,1408:down|hsa:92552,ATXN3L,92552:down|hsa:1786,DNMT1,1786:up|hsa:27332,ZNF638,27332:up|hsa:6787,NEK4,6787:up|hsa:222546,RFX6,…	http://amigo.geneontology.org/cgi-bin/amigo/term_details?term=GO:2001141
muscle tissue development	Biological Process	GO:0060537	35	339	1438	17840	0.0243393602225313	0.0190022421524664	7.778822e-02	0.6731420	hsa:9150,CTDP1,9150:down|hsa:90,ACVR1,90:up|hsa:70,ACTC1,70:down|hsa:1508,CTSB,1508:up|hsa:1063,CENPF,1063:up|hsa:6662,SOX9,6662:up|hsa:7135,TNNI1,7135:up|hsa:891,CCNB1,891:up|hsa:7474,WNT5A,7474:up|hsa:811,CALR,811:up|hsa:9456,HOMER1,9456:up|hsa:23363,OBSL1,23363:up|hsa:10529,NEBL,10529:down|hsa:1829,DSG2,1829:up|hsa:6548,SLC9A1,6548:down|hsa:3776,KCNK2,3776:up|hsa:55553,SOX6,55553:down|hsa:2658…	http://amigo.geneontology.org/cgi-bin/amigo/term_details?term=GO:0060537
regulation of biomineral tissue development	Biological Process	GO:0070167	10	75	1438	17840	0.00695410292072323	0.00420403587443946	7.791417e-02	0.6731420	hsa:26585,GREM1,26585:down|hsa:90,ACVR1,90:up|hsa:54829,ASPN,54829:up|hsa:659,BMPR2,659:up|hsa:3091,HIF1A,3091:up|hsa:6662,SOX9,6662:up|hsa:154,ADRB2,154:down|hsa:91461,PKDCC,91461:down|hsa:652,BMP4,652:down|hsa:359845,FAM101B,359845:up	http://amigo.geneontology.org/cgi-bin/amigo/term_details?term=GO:0070167
negative regulation of lipid metabolic process	Biological Process	GO:0045833	10	75	1438	17840	0.00695410292072323	0.00420403587443946	7.791417e-02	0.6731420	hsa:892,CCNC,892:up|hsa:33,ACADL,33:down|hsa:51141,INSIG2,51141:up|hsa:23409,SIRT4,23409:up|hsa:145264,SERPINA12,145264:down|hsa:11160,ERLIN2,11160:up|hsa:55294,FBXW7,55294:down|hsa:672,BRCA1,672:up|hsa:79888,LPCAT1,79888:up|hsa:2822,GPLD1,2822:down	http://amigo.geneontology.org/cgi-bin/amigo/term_details?term=GO:0045833
modulation of programmed cell death in other organism	Biological Process	GO:0044531	2	6	1438	17840	0.00139082058414465	0.000336322869955157	7.830037e-02	0.6731420	hsa:10018,BCL2L11,10018:up|hsa:841,CASP8,841:up	http://amigo.geneontology.org/cgi-bin/amigo/term_details?term=GO:0044531
negative regulation of mesonephros development	Biological Process	GO:0061218	2	6	1438	17840	0.00139082058414465	0.000336322869955157	7.830037e-02	0.6731420	hsa:26585,GREM1,26585:down|hsa:652,BMP4,652:down	http://amigo.geneontology.org/cgi-bin/amigo/term_details?term=GO:0061218
cellular response to bacterial lipopeptide	Biological Process	GO:0071221	2	6	1438	17840	0.00139082058414465	0.000336322869955157	7.830037e-02	0.6731420	hsa:7097,TLR2,7097:up|hsa:7096,TLR1,7096:up	http://amigo.geneontology.org/cgi-bin/amigo/term_details?term=GO:0071221
nucleolus organization	Biological Process	GO:0007000	2	6	1438	17840	0.00139082058414465	0.000336322869955157	7.830037e-02	0.6731420	hsa:54700,RRN3,54700:up|hsa:6940,ZNF354A,6940:up	http://amigo.geneontology.org/cgi-bin/amigo/term_details?term=GO:0007000
hard palate development	Biological Process	GO:0060022	2	6	1438	17840	0.00139082058414465	0.000336322869955157	7.830037e-02	0.6731420	hsa:2304,FOXE1,2304:up|hsa:2535,FZD2,2535:up	http://amigo.geneontology.org/cgi-bin/amigo/term_details?term=GO:0060022
vitamin K metabolic process	Biological Process	GO:0042373	2	6	1438	17840	0.00139082058414465	0.000336322869955157	7.830037e-02	0.6731420	hsa:8529,CYP4F2,8529:up|hsa:57834,CYP4F11,57834:up	http://amigo.geneontology.org/cgi-bin/amigo/term_details?term=GO:0042373
urea transmembrane transport	Biological Process	GO:0071918	2	6	1438	17840	0.00139082058414465	0.000336322869955157	7.830037e-02	0.6731420	hsa:89872,AQP10,89872:up|hsa:366,AQP9,366:down	http://amigo.geneontology.org/cgi-bin/amigo/term_details?term=GO:0071918
regulation of interleukin-5 secretion	Biological Process	GO:2000662	2	6	1438	17840	0.00139082058414465	0.000336322869955157	7.830037e-02	0.6731420	hsa:55540,IL17RB,55540:up|hsa:27242,TNFRSF21,27242:up	http://amigo.geneontology.org/cgi-bin/amigo/term_details?term=GO:2000662
regulation of mesenchymal stem cell differentiation	Biological Process	GO:2000739	2	6	1438	17840	0.00139082058414465	0.000336322869955157	7.830037e-02	0.6731420	hsa:55553,SOX6,55553:down|hsa:6662,SOX9,6662:up	http://amigo.geneontology.org/cgi-bin/amigo/term_details?term=GO:2000739
convergent extension involved in organogenesis	Biological Process	GO:0060029	2	6	1438	17840	0.00139082058414465	0.000336322869955157	7.830037e-02	0.6731420	hsa:57216,VANGL2,57216:up|hsa:7474,WNT5A,7474:up	http://amigo.geneontology.org/cgi-bin/amigo/term_details?term=GO:0060029
regulation of autophagosome maturation	Biological Process	GO:1901096	2	6	1438	17840	0.00139082058414465	0.000336322869955157	7.830037e-02	0.6731420	hsa:154,ADRB2,154:down|hsa:79142,PHF23,79142:up	http://amigo.geneontology.org/cgi-bin/amigo/term_details?term=GO:1901096
adrenergic receptor signaling pathway involved in heart process	Biological Process	GO:0086023	2	6	1438	17840	0.00139082058414465	0.000336322869955157	7.830037e-02	0.6731420	hsa:5144,PDE4D,5144:down|hsa:1113,CHGA,1113:up	http://amigo.geneontology.org/cgi-bin/amigo/term_details?term=GO:0086023
3'-phosphoadenosine 5'-phosphosulfate biosynthetic process	Biological Process	GO:0050428	2	6	1438	17840	0.00139082058414465	0.000336322869955157	7.830037e-02	0.6731420	hsa:1836,SLC26A2,1836:up|hsa:9060,PAPSS2,9060:up	http://amigo.geneontology.org/cgi-bin/amigo/term_details?term=GO:0050428
regulation of protein folding	Biological Process	GO:1903332	2	6	1438	17840	0.00139082058414465	0.000336322869955157	7.830037e-02	0.6731420	hsa:9141,PDCD5,9141:up|hsa:5082,PDCL,5082:up	http://amigo.geneontology.org/cgi-bin/amigo/term_details?term=GO:1903332
negative regulation of glucocorticoid receptor signaling pathway	Biological Process	GO:2000323	2	6	1438	17840	0.00139082058414465	0.000336322869955157	7.830037e-02	0.6731420	hsa:1408,CRY2,1408:down|hsa:5187,PER1,5187:down	http://amigo.geneontology.org/cgi-bin/amigo/term_details?term=GO:2000323
cellular response to bacterial lipoprotein	Biological Process	GO:0071220	2	6	1438	17840	0.00139082058414465	0.000336322869955157	7.830037e-02	0.6731420	hsa:7097,TLR2,7097:up|hsa:7096,TLR1,7096:up	http://amigo.geneontology.org/cgi-bin/amigo/term_details?term=GO:0071220
interleukin-5 secretion	Biological Process	GO:0072603	2	6	1438	17840	0.00139082058414465	0.000336322869955157	7.830037e-02	0.6731420	hsa:55540,IL17RB,55540:up|hsa:27242,TNFRSF21,27242:up	http://amigo.geneontology.org/cgi-bin/amigo/term_details?term=GO:0072603
neural crest formation	Biological Process	GO:0014029	2	6	1438	17840	0.00139082058414465	0.000336322869955157	7.830037e-02	0.6731420	hsa:4040,LRP6,4040:up|hsa:5077,PAX3,5077:up	http://amigo.geneontology.org/cgi-bin/amigo/term_details?term=GO:0014029
purine ribonucleoside bisphosphate biosynthetic process	Biological Process	GO:0034036	2	6	1438	17840	0.00139082058414465	0.000336322869955157	7.830037e-02	0.6731420	hsa:1836,SLC26A2,1836:up|hsa:9060,PAPSS2,9060:up	http://amigo.geneontology.org/cgi-bin/amigo/term_details?term=GO:0034036
positive regulation of myoblast proliferation	Biological Process	GO:2000288	2	6	1438	17840	0.00139082058414465	0.000336322869955157	7.830037e-02	0.6731420	hsa:94104,PAXBP1,94104:up|hsa:6665,SOX15,6665:down	http://amigo.geneontology.org/cgi-bin/amigo/term_details?term=GO:2000288
protein transport into membrane raft	Biological Process	GO:0032596	2	6	1438	17840	0.00139082058414465	0.000336322869955157	7.830037e-02	0.6731420	hsa:100133941,CD24,100133941:up|hsa:51308,REEP2,51308:up	http://amigo.geneontology.org/cgi-bin/amigo/term_details?term=GO:0032596
modulation by symbiont of host programmed cell death	Biological Process	GO:0052040	2	6	1438	17840	0.00139082058414465	0.000336322869955157	7.830037e-02	0.6731420	hsa:10018,BCL2L11,10018:up|hsa:841,CASP8,841:up	http://amigo.geneontology.org/cgi-bin/amigo/term_details?term=GO:0052040
modulation by symbiont of host apoptotic process	Biological Process	GO:0052150	2	6	1438	17840	0.00139082058414465	0.000336322869955157	7.830037e-02	0.6731420	hsa:10018,BCL2L11,10018:up|hsa:841,CASP8,841:up	http://amigo.geneontology.org/cgi-bin/amigo/term_details?term=GO:0052150
sequestering of actin monomers	Biological Process	GO:0042989	2	6	1438	17840	0.00139082058414465	0.000336322869955157	7.830037e-02	0.6731420	hsa:5756,TWF1,5756:up|hsa:85477,SCIN,85477:down	http://amigo.geneontology.org/cgi-bin/amigo/term_details?term=GO:0042989
protein localization to cell junction	Biological Process	GO:1902414	2	6	1438	17840	0.00139082058414465	0.000336322869955157	7.830037e-02	0.6731420	hsa:143098,MPP7,143098:down|hsa:91862,MARVELD3,91862:up	http://amigo.geneontology.org/cgi-bin/amigo/term_details?term=GO:1902414
ductus arteriosus closure	Biological Process	GO:0097070	2	6	1438	17840	0.00139082058414465	0.000336322869955157	7.830037e-02	0.6731420	hsa:64220,STRA6,64220:up|hsa:5734,PTGER4,5734:up	http://amigo.geneontology.org/cgi-bin/amigo/term_details?term=GO:0097070
modulation by organism of apoptotic process in other organism involved in symbiotic interaction	Biological Process	GO:0052433	2	6	1438	17840	0.00139082058414465	0.000336322869955157	7.830037e-02	0.6731420	hsa:10018,BCL2L11,10018:up|hsa:841,CASP8,841:up	http://amigo.geneontology.org/cgi-bin/amigo/term_details?term=GO:0052433
planar cell polarity pathway involved in axis elongation	Biological Process	GO:0003402	2	6	1438	17840	0.00139082058414465	0.000336322869955157	7.830037e-02	0.6731420	hsa:57216,VANGL2,57216:up|hsa:7474,WNT5A,7474:up	http://amigo.geneontology.org/cgi-bin/amigo/term_details?term=GO:0003402
modulation of programmed cell death in other organism involved in symbiotic interaction	Biological Process	GO:0052248	2	6	1438	17840	0.00139082058414465	0.000336322869955157	7.830037e-02	0.6731420	hsa:10018,BCL2L11,10018:up|hsa:841,CASP8,841:up	http://amigo.geneontology.org/cgi-bin/amigo/term_details?term=GO:0052248
negative regulation of tyrosine phosphorylation of Stat3 protein	Biological Process	GO:0042518	2	6	1438	17840	0.00139082058414465	0.000336322869955157	7.830037e-02	0.6731420	hsa:5771,PTPN2,5771:up|hsa:8651,SOCS1,8651:up	http://amigo.geneontology.org/cgi-bin/amigo/term_details?term=GO:0042518
negative regulation of transforming growth factor beta production	Biological Process	GO:0071635	2	6	1438	17840	0.00139082058414465	0.000336322869955157	7.830037e-02	0.6731420	hsa:100133941,CD24,100133941:up|hsa:23607,CD2AP,23607:up	http://amigo.geneontology.org/cgi-bin/amigo/term_details?term=GO:0071635
negative regulation of thymocyte apoptotic process	Biological Process	GO:0070244	2	6	1438	17840	0.00139082058414465	0.000336322869955157	7.830037e-02	0.6731420	hsa:652,BMP4,652:down|hsa:3091,HIF1A,3091:up	http://amigo.geneontology.org/cgi-bin/amigo/term_details?term=GO:0070244
comma-shaped body morphogenesis	Biological Process	GO:0072049	2	6	1438	17840	0.00139082058414465	0.000336322869955157	7.830037e-02	0.6731420	hsa:388585,HES5,388585:down|hsa:652,BMP4,652:down	http://amigo.geneontology.org/cgi-bin/amigo/term_details?term=GO:0072049
protein import into mitochondrial outer membrane	Biological Process	GO:0045040	2	6	1438	17840	0.00139082058414465	0.000336322869955157	7.830037e-02	0.6731420	hsa:3320,HSP90AA1,3320:up|hsa:9141,PDCD5,9141:up	http://amigo.geneontology.org/cgi-bin/amigo/term_details?term=GO:0045040
response to bacterial lipopeptide	Biological Process	GO:0070339	2	6	1438	17840	0.00139082058414465	0.000336322869955157	7.830037e-02	0.6731420	hsa:7097,TLR2,7097:up|hsa:7096,TLR1,7096:up	http://amigo.geneontology.org/cgi-bin/amigo/term_details?term=GO:0070339
positive regulation of histone H4 acetylation	Biological Process	GO:0090240	2	6	1438	17840	0.00139082058414465	0.000336322869955157	7.830037e-02	0.6731420	hsa:672,BRCA1,672:up|hsa:26053,AUTS2,26053:up	http://amigo.geneontology.org/cgi-bin/amigo/term_details?term=GO:0090240
regulation of interleukin-1 alpha production	Biological Process	GO:0032650	2	6	1438	17840	0.00139082058414465	0.000336322869955157	7.830037e-02	0.6731420	hsa:24145,PANX1,24145:up|hsa:5734,PTGER4,5734:up	http://amigo.geneontology.org/cgi-bin/amigo/term_details?term=GO:0032650
positive regulation of cellular senescence	Biological Process	GO:2000774	2	6	1438	17840	0.00139082058414465	0.000336322869955157	7.830037e-02	0.6731420	hsa:9521,EEF1E1,9521:up|hsa:1029,CDKN2A,1029:up	http://amigo.geneontology.org/cgi-bin/amigo/term_details?term=GO:2000774
negative regulation of smooth muscle cell apoptotic process	Biological Process	GO:0034392	2	6	1438	17840	0.00139082058414465	0.000336322869955157	7.830037e-02	0.6731420	hsa:4040,LRP6,4040:up|hsa:3479,IGF1,3479:down	http://amigo.geneontology.org/cgi-bin/amigo/term_details?term=GO:0034392
modulation of apoptotic process in other organism	Biological Process	GO:0044532	2	6	1438	17840	0.00139082058414465	0.000336322869955157	7.830037e-02	0.6731420	hsa:10018,BCL2L11,10018:up|hsa:841,CASP8,841:up	http://amigo.geneontology.org/cgi-bin/amigo/term_details?term=GO:0044532
fructose 2,6-bisphosphate metabolic process	Biological Process	GO:0006003	2	6	1438	17840	0.00139082058414465	0.000336322869955157	7.830037e-02	0.6731420	hsa:5210,PFKFB4,5210:up|hsa:57103,TIGAR,57103:up	http://amigo.geneontology.org/cgi-bin/amigo/term_details?term=GO:0006003
positive regulation of skeletal muscle tissue regeneration	Biological Process	GO:0043415	2	6	1438	17840	0.00139082058414465	0.000336322869955157	7.830037e-02	0.6731420	hsa:6665,SOX15,6665:down|hsa:84525,HOPX,84525:down	http://amigo.geneontology.org/cgi-bin/amigo/term_details?term=GO:0043415
actin filament network formation	Biological Process	GO:0051639	2	6	1438	17840	0.00139082058414465	0.000336322869955157	7.830037e-02	0.6731420	hsa:87,ACTN1,87:up|hsa:23242,COBL,23242:down	http://amigo.geneontology.org/cgi-bin/amigo/term_details?term=GO:0051639
negative regulation of epithelial cell proliferation	Biological Process	GO:0050680	14	115	1438	17840	0.00973574408901252	0.00644618834080718	7.876644e-02	0.6731420	hsa:7421,VDR,7421:up|hsa:10247,RIDA,10247:up|hsa:8573,CASK,8573:up|hsa:675,BRCA2,675:up|hsa:6662,SOX9,6662:up|hsa:1515,CTSV,1515:up|hsa:2069,EREG,2069:down|hsa:26160,IFT172,26160:up|hsa:55294,FBXW7,55294:down|hsa:652,BMP4,652:down|hsa:55840,EAF2,55840:up|hsa:57152,SLURP1,57152:down|hsa:91862,MARVELD3,91862:up|hsa:7474,WNT5A,7474:up	http://amigo.geneontology.org/cgi-bin/amigo/term_details?term=GO:0050680
actin filament-based process	Biological Process	GO:0030029	60	620	1438	17840	0.0417246175243394	0.0347533632286996	7.896328e-02	0.6731420	hsa:4622,MYH4,4622:down|hsa:6712,SPTBN2,6712:down|hsa:10602,CDC42EP3,10602:up|hsa:3636,INPPL1,3636:up|hsa:7184,HSP90B1,7184:up|hsa:3728,JUP,3728:down|hsa:70,ACTC1,70:down|hsa:8936,WASF1,8936:up|hsa:7094,TLN1,7094:up|hsa:25802,LMOD1,25802:down|hsa:7135,TNNI1,7135:up|hsa:90167,FRMD7,90167:down|hsa:359845,FAM101B,359845:up|hsa:85477,SCIN,85477:down|hsa:5756,TWF1,5756:up|hsa:811,CALR,811:up|hsa:57026…	http://amigo.geneontology.org/cgi-bin/amigo/term_details?term=GO:0030029
extrinsic apoptotic signaling pathway via death domain receptors	Biological Process	GO:0008625	11	85	1438	17840	0.00764951321279555	0.00476457399103139	7.903768e-02	0.6731420	hsa:3958,LGALS3,3958:down|hsa:6788,STK3,6788:up|hsa:5366,PMAIP1,5366:up|hsa:8743,TNFSF10,8743:up|hsa:5054,SERPINE1,5054:up|hsa:2244,FGB,2244:down|hsa:2266,FGG,2266:down|hsa:672,BRCA1,672:up|hsa:841,CASP8,841:up|hsa:637,BID,637:up|hsa:9994,CASP8AP2,9994:up	http://amigo.geneontology.org/cgi-bin/amigo/term_details?term=GO:0008625
regulation of glucose metabolic process	Biological Process	GO:0010906	13	105	1438	17840	0.0090403337969402	0.00588565022421525	7.930286e-02	0.6731420	hsa:5771,PTPN2,5771:up|hsa:57001,SDHAF3,57001:up|hsa:9852,EPM2AIP1,9852:up|hsa:114899,C1QTNF3,114899:down|hsa:57103,TIGAR,57103:up|hsa:5366,PMAIP1,5366:up|hsa:145264,SERPINA12,145264:down|hsa:5166,PDK4,5166:down|hsa:3479,IGF1,3479:down|hsa:10776,ARPP19,10776:up|hsa:9572,NR1D1,9572:down|hsa:6095,RORA,6095:down|hsa:2822,GPLD1,2822:down	http://amigo.geneontology.org/cgi-bin/amigo/term_details?term=GO:0010906
protein depolymerization	Biological Process	GO:0051261	12	95	1438	17840	0.00834492350486787	0.00532511210762332	7.943829e-02	0.6731420	hsa:5756,TWF1,5756:up|hsa:29765,TMOD4,29765:up|hsa:6712,SPTBN2,6712:down|hsa:57026,PDXP,57026:up|hsa:57159,TRIM54,57159:up|hsa:10677,AVIL,10677:up|hsa:25802,LMOD1,25802:down|hsa:50810,HDGFRP3,50810:up|hsa:830,CAPZA2,830:up|hsa:3925,STMN1,3925:up|hsa:4281,MID1,4281:down|hsa:85477,SCIN,85477:down	http://amigo.geneontology.org/cgi-bin/amigo/term_details?term=GO:0051261
negative regulation of microtubule polymerization or depolymerization	Biological Process	GO:0031111	5	29	1438	17840	0.00347705146036161	0.00162556053811659	7.952422e-02	0.6731420	hsa:50810,HDGFRP3,50810:up|hsa:57159,TRIM54,57159:up|hsa:27124,INPP5J,27124:down|hsa:3925,STMN1,3925:up|hsa:4281,MID1,4281:down	http://amigo.geneontology.org/cgi-bin/amigo/term_details?term=GO:0031111
regulation of oligodendrocyte differentiation	Biological Process	GO:0048713	5	29	1438	17840	0.00347705146036161	0.00162556053811659	7.952422e-02	0.6731420	hsa:388585,HES5,388585:down|hsa:7852,CXCR4,7852:up|hsa:652,BMP4,652:down|hsa:27242,TNFRSF21,27242:up|hsa:3066,HDAC2,3066:up	http://amigo.geneontology.org/cgi-bin/amigo/term_details?term=GO:0048713
cortical actin cytoskeleton organization	Biological Process	GO:0030866	5	29	1438	17840	0.00347705146036161	0.00162556053811659	7.952422e-02	0.6731420	hsa:811,CALR,811:up|hsa:6093,ROCK1,6093:up|hsa:7094,TLN1,7094:up|hsa:9475,ROCK2,9475:up|hsa:114793,FMNL2,114793:up	http://amigo.geneontology.org/cgi-bin/amigo/term_details?term=GO:0030866
potassium ion import	Biological Process	GO:0010107	5	29	1438	17840	0.00347705146036161	0.00162556053811659	7.952422e-02	0.6731420	hsa:3762,KCNJ5,3762:up|hsa:9990,SLC12A6,9990:up|hsa:3765,KCNJ9,3765:down|hsa:3759,KCNJ2,3759:down|hsa:3773,KCNJ16,3773:down	http://amigo.geneontology.org/cgi-bin/amigo/term_details?term=GO:0010107
regulation of cytoplasmic transport	Biological Process	GO:1903649	45	451	1438	17840	0.0312934631432545	0.025280269058296	7.980522e-02	0.6731420	hsa:81555,YIPF5,81555:up|hsa:3728,JUP,3728:down|hsa:114899,C1QTNF3,114899:down|hsa:4659,PPP1R12A,4659:up|hsa:1950,EGF,1950:up|hsa:54069,MIS18A,54069:up|hsa:3843,IPO5,3843:up|hsa:5532,PPP3CB,5532:up|hsa:9141,PDCD5,9141:up|hsa:163882,CNST,163882:down|hsa:3479,IGF1,3479:down|hsa:6548,SLC9A1,6548:down|hsa:7220,TRPC1,7220:up|hsa:55294,FBXW7,55294:down|hsa:3717,JAK2,3717:up|hsa:51706,CYB5R1,51706:down|…	http://amigo.geneontology.org/cgi-bin/amigo/term_details?term=GO:1903649
protein localization to nucleus	Biological Process	GO:0034504	36	351	1438	17840	0.0250347705146036	0.0196748878923767	8.019746e-02	0.6731420	hsa:54971,BANP,54971:down|hsa:10527,IPO7,10527:up|hsa:3728,JUP,3728:down|hsa:114899,C1QTNF3,114899:down|hsa:6662,SOX9,6662:up|hsa:1950,EGF,1950:up|hsa:3843,IPO5,3843:up|hsa:9451,EIF2AK3,9451:up|hsa:5532,PPP3CB,5532:up|hsa:22948,CCT5,22948:up|hsa:811,CALR,811:up|hsa:23607,CD2AP,23607:up|hsa:10628,TXNIP,10628:down|hsa:3479,IGF1,3479:down|hsa:6548,SLC9A1,6548:down|hsa:3717,JAK2,3717:up|hsa:1408,CRY2…	http://amigo.geneontology.org/cgi-bin/amigo/term_details?term=GO:0034504
striated muscle cell differentiation	Biological Process	GO:0051146	25	231	1438	17840	0.0173852573018081	0.0129484304932735	8.046920e-02	0.6731420	hsa:9150,CTDP1,9150:down|hsa:26585,GREM1,26585:down|hsa:90,ACVR1,90:up|hsa:70,ACTC1,70:down|hsa:4878,NPPA,4878:up|hsa:25802,LMOD1,25802:down|hsa:58529,MYOZ1,58529:up|hsa:891,CCNB1,891:up|hsa:91624,NEXN,91624:up|hsa:55544,RBM38,55544:up|hsa:4629,MYH11,4629:down|hsa:84525,HOPX,84525:down|hsa:811,CALR,811:up|hsa:29765,TMOD4,29765:up|hsa:9456,HOMER1,9456:up|hsa:23363,OBSL1,23363:up|hsa:10529,NEBL,105…	http://amigo.geneontology.org/cgi-bin/amigo/term_details?term=GO:0051146
connective tissue development	Biological Process	GO:0061448	25	231	1438	17840	0.0173852573018081	0.0129484304932735	8.046920e-02	0.6731420	hsa:26585,GREM1,26585:down|hsa:860,RUNX2,860:up|hsa:659,BMPR2,659:up|hsa:1302,COL11A2,1302:up|hsa:6662,SOX9,6662:up|hsa:9451,EIF2AK3,9451:up|hsa:91461,PKDCC,91461:down|hsa:359845,FAM101B,359845:up|hsa:2822,GPLD1,2822:down|hsa:7474,WNT5A,7474:up|hsa:85477,SCIN,85477:down|hsa:7482,WNT2B,7482:down|hsa:3696,ITGB8,3696:up|hsa:3091,HIF1A,3091:up|hsa:3202,HOXA5,3202:down|hsa:5307,PITX1,5307:up|hsa:8710,…	http://amigo.geneontology.org/cgi-bin/amigo/term_details?term=GO:0061448
chemoattraction of axon	Biological Process	GO:0061642	1	1	1438	17840	0.000695410292072323	5.60538116591928e-05	8.060538e-02	0.6731420	hsa:7474,WNT5A,7474:up	http://amigo.geneontology.org/cgi-bin/amigo/term_details?term=GO:0061642
positive regulation of macromitophagy	Biological Process	GO:1901526	1	1	1438	17840	0.000695410292072323	5.60538116591928e-05	8.060538e-02	0.6731420	hsa:154,ADRB2,154:down	http://amigo.geneontology.org/cgi-bin/amigo/term_details?term=GO:1901526
telomeric RNA transcription	Biological Process	GO:0097393	1	1	1438	17840	0.000695410292072323	5.60538116591928e-05	8.060538e-02	0.6731420	hsa:546,ATRX,546:up	http://amigo.geneontology.org/cgi-bin/amigo/term_details?term=GO:0097393
mitochondrial alanyl-tRNA aminoacylation	Biological Process	GO:0070143	1	1	1438	17840	0.000695410292072323	5.60538116591928e-05	8.060538e-02	0.6731420	hsa:57505,AARS2,57505:up	http://amigo.geneontology.org/cgi-bin/amigo/term_details?term=GO:0070143
sequestering of nodal from receptor via nodal binding	Biological Process	GO:0038101	1	1	1438	17840	0.000695410292072323	5.60538116591928e-05	8.060538e-02	0.6731420	hsa:199699,DAND5,199699:up	http://amigo.geneontology.org/cgi-bin/amigo/term_details?term=GO:0038101
bud dilation involved in lung branching	Biological Process	GO:0060503	1	1	1438	17840	0.000695410292072323	5.60538116591928e-05	8.060538e-02	0.6731420	hsa:652,BMP4,652:down	http://amigo.geneontology.org/cgi-bin/amigo/term_details?term=GO:0060503
intermediate mesoderm formation	Biological Process	GO:0048391	1	1	1438	17840	0.000695410292072323	5.60538116591928e-05	8.060538e-02	0.6731420	hsa:652,BMP4,652:down	http://amigo.geneontology.org/cgi-bin/amigo/term_details?term=GO:0048391
mitochondrial tRNA pseudouridine synthesis	Biological Process	GO:0070902	1	1	1438	17840	0.000695410292072323	5.60538116591928e-05	8.060538e-02	0.6731420	hsa:80324,PUS1,80324:down	http://amigo.geneontology.org/cgi-bin/amigo/term_details?term=GO:0070902
negative regulation of Golgi to plasma membrane CFTR protein transport	Biological Process	GO:0043002	1	1	1438	17840	0.000695410292072323	5.60538116591928e-05	8.060538e-02	0.6731420	hsa:57120,GOPC,57120:up	http://amigo.geneontology.org/cgi-bin/amigo/term_details?term=GO:0043002
regulation of cell proliferation involved in tissue homeostasis	Biological Process	GO:0060784	1	1	1438	17840	0.000695410292072323	5.60538116591928e-05	8.060538e-02	0.6731420	hsa:6662,SOX9,6662:up	http://amigo.geneontology.org/cgi-bin/amigo/term_details?term=GO:0060784
regulation of pro-T cell differentiation	Biological Process	GO:2000174	1	1	1438	17840	0.000695410292072323	5.60538116591928e-05	8.060538e-02	0.6731420	hsa:22890,ZBTB1,22890:up	http://amigo.geneontology.org/cgi-bin/amigo/term_details?term=GO:2000174
suppression by virus of host catalytic activity	Biological Process	GO:0039513	1	1	1438	17840	0.000695410292072323	5.60538116591928e-05	8.060538e-02	0.6731420	hsa:841,CASP8,841:up	http://amigo.geneontology.org/cgi-bin/amigo/term_details?term=GO:0039513
regulation of replicative cell aging	Biological Process	GO:1900062	1	1	1438	17840	0.000695410292072323	5.60538116591928e-05	8.060538e-02	0.6731420	hsa:6787,NEK4,6787:up	http://amigo.geneontology.org/cgi-bin/amigo/term_details?term=GO:1900062
cell adhesion involved in heart morphogenesis	Biological Process	GO:0061343	1	1	1438	17840	0.000695410292072323	5.60538116591928e-05	8.060538e-02	0.6731420	hsa:23768,FLRT2,23768:up	http://amigo.geneontology.org/cgi-bin/amigo/term_details?term=GO:0061343
regulation of potassium ion export across plasma membrane	Biological Process	GO:1903764	1	1	1438	17840	0.000695410292072323	5.60538116591928e-05	8.060538e-02	0.6731420	hsa:4878,NPPA,4878:up	http://amigo.geneontology.org/cgi-bin/amigo/term_details?term=GO:1903764
renal system segmentation	Biological Process	GO:0061150	1	1	1438	17840	0.000695410292072323	5.60538116591928e-05	8.060538e-02	0.6731420	hsa:652,BMP4,652:down	http://amigo.geneontology.org/cgi-bin/amigo/term_details?term=GO:0061150
inactivation of X chromosome by DNA methylation	Biological Process	GO:0060821	1	1	1438	17840	0.000695410292072323	5.60538116591928e-05	8.060538e-02	0.6731420	hsa:23347,SMCHD1,23347:up	http://amigo.geneontology.org/cgi-bin/amigo/term_details?term=GO:0060821
primary follicle stage	Biological Process	GO:0048160	1	1	1438	17840	0.000695410292072323	5.60538116591928e-05	8.060538e-02	0.6731420	hsa:2069,EREG,2069:down	http://amigo.geneontology.org/cgi-bin/amigo/term_details?term=GO:0048160
L-ornithine import across plasma membrane	Biological Process	GO:0097640	1	1	1438	17840	0.000695410292072323	5.60538116591928e-05	8.060538e-02	0.6731420	hsa:6542,SLC7A2,6542:up	http://amigo.geneontology.org/cgi-bin/amigo/term_details?term=GO:0097640
negative regulation of L-glutamate transport	Biological Process	GO:0002037	1	1	1438	17840	0.000695410292072323	5.60538116591928e-05	8.060538e-02	0.6731420	hsa:10550,ARL6IP5,10550:up	http://amigo.geneontology.org/cgi-bin/amigo/term_details?term=GO:0002037
L-lysine import	Biological Process	GO:0061461	1	1	1438	17840	0.000695410292072323	5.60538116591928e-05	8.060538e-02	0.6731420	hsa:6542,SLC7A2,6542:up	http://amigo.geneontology.org/cgi-bin/amigo/term_details?term=GO:0061461
negative regulation of vascular wound healing	Biological Process	GO:0061044	1	1	1438	17840	0.000695410292072323	5.60538116591928e-05	8.060538e-02	0.6731420	hsa:5054,SERPINE1,5054:up	http://amigo.geneontology.org/cgi-bin/amigo/term_details?term=GO:0061044
B cell receptor transport into membrane raft	Biological Process	GO:0032597	1	1	1438	17840	0.000695410292072323	5.60538116591928e-05	8.060538e-02	0.6731420	hsa:100133941,CD24,100133941:up	http://amigo.geneontology.org/cgi-bin/amigo/term_details?term=GO:0032597
peptide antigen assembly with MHC class I protein complex	Biological Process	GO:0002502	1	1	1438	17840	0.000695410292072323	5.60538116591928e-05	8.060538e-02	0.6731420	hsa:811,CALR,811:up	http://amigo.geneontology.org/cgi-bin/amigo/term_details?term=GO:0002502
endothelial cell activation involved in immune response	Biological Process	GO:0002264	1	1	1438	17840	0.000695410292072323	5.60538116591928e-05	8.060538e-02	0.6731420	hsa:56892,C8orf4,56892:up	http://amigo.geneontology.org/cgi-bin/amigo/term_details?term=GO:0002264
specification of ureteric bud anterior/posterior symmetry by BMP signaling pathway	Biological Process	GO:0072101	1	1	1438	17840	0.000695410292072323	5.60538116591928e-05	8.060538e-02	0.6731420	hsa:652,BMP4,652:down	http://amigo.geneontology.org/cgi-bin/amigo/term_details?term=GO:0072101
regulation of leukotriene production involved in inflammatory response	Biological Process	GO:0035490	1	1	1438	17840	0.000695410292072323	5.60538116591928e-05	8.060538e-02	0.6731420	hsa:5054,SERPINE1,5054:up	http://amigo.geneontology.org/cgi-bin/amigo/term_details?term=GO:0035490
positive regulation of bile acid metabolic process	Biological Process	GO:1904253	1	1	1438	17840	0.000695410292072323	5.60538116591928e-05	8.060538e-02	0.6731420	hsa:9572,NR1D1,9572:down	http://amigo.geneontology.org/cgi-bin/amigo/term_details?term=GO:1904253
pulmonary artery endothelial tube morphogenesis	Biological Process	GO:0061155	1	1	1438	17840	0.000695410292072323	5.60538116591928e-05	8.060538e-02	0.6731420	hsa:652,BMP4,652:down	http://amigo.geneontology.org/cgi-bin/amigo/term_details?term=GO:0061155
histone displacement	Biological Process	GO:0001207	1	1	1438	17840	0.000695410292072323	5.60538116591928e-05	8.060538e-02	0.6731420	hsa:676,BRDT,676:down	http://amigo.geneontology.org/cgi-bin/amigo/term_details?term=GO:0001207
polyamine homeostasis	Biological Process	GO:0010509	1	1	1438	17840	0.000695410292072323	5.60538116591928e-05	8.060538e-02	0.6731420	hsa:56648,EIF5A2,56648:up	http://amigo.geneontology.org/cgi-bin/amigo/term_details?term=GO:0010509
positive regulation of single stranded viral RNA replication via double stranded DNA intermediate	Biological Process	GO:0045870	1	1	1438	17840	0.000695410292072323	5.60538116591928e-05	8.060538e-02	0.6731420	hsa:7153,TOP2A,7153:up	http://amigo.geneontology.org/cgi-bin/amigo/term_details?term=GO:0045870
renal phosphate excretion	Biological Process	GO:0044722	1	1	1438	17840	0.000695410292072323	5.60538116591928e-05	8.060538e-02	0.6731420	hsa:6781,STC1,6781:up	http://amigo.geneontology.org/cgi-bin/amigo/term_details?term=GO:0044722
positive regulation of the force of heart contraction by epinephrine	Biological Process	GO:0003059	1	1	1438	17840	0.000695410292072323	5.60538116591928e-05	8.060538e-02	0.6731420	hsa:154,ADRB2,154:down	http://amigo.geneontology.org/cgi-bin/amigo/term_details?term=GO:0003059
GPI anchor release	Biological Process	GO:0006507	1	1	1438	17840	0.000695410292072323	5.60538116591928e-05	8.060538e-02	0.6731420	hsa:2822,GPLD1,2822:down	http://amigo.geneontology.org/cgi-bin/amigo/term_details?term=GO:0006507
negative regulation of tyrosine phosphorylation of Stat6 protein	Biological Process	GO:0042527	1	1	1438	17840	0.000695410292072323	5.60538116591928e-05	8.060538e-02	0.6731420	hsa:5771,PTPN2,5771:up	http://amigo.geneontology.org/cgi-bin/amigo/term_details?term=GO:0042527
BMP signaling pathway involved in ureter morphogenesis	Biological Process	GO:0061149	1	1	1438	17840	0.000695410292072323	5.60538116591928e-05	8.060538e-02	0.6731420	hsa:652,BMP4,652:down	http://amigo.geneontology.org/cgi-bin/amigo/term_details?term=GO:0061149
negative regulation of telomeric RNA transcription from RNA pol II promoter	Biological Process	GO:1901581	1	1	1438	17840	0.000695410292072323	5.60538116591928e-05	8.060538e-02	0.6731420	hsa:546,ATRX,546:up	http://amigo.geneontology.org/cgi-bin/amigo/term_details?term=GO:1901581
histone H3-S10 phosphorylation involved in chromosome condensation	Biological Process	GO:2000775	1	1	1438	17840	0.000695410292072323	5.60538116591928e-05	8.060538e-02	0.6731420	hsa:891,CCNB1,891:up	http://amigo.geneontology.org/cgi-bin/amigo/term_details?term=GO:2000775
microtubule-dependent intracellular transport of viral material	Biological Process	GO:0075519	1	1	1438	17840	0.000695410292072323	5.60538116591928e-05	8.060538e-02	0.6731420	hsa:6993,DYNLT1,6993:up	http://amigo.geneontology.org/cgi-bin/amigo/term_details?term=GO:0075519
negative regulation of glomerular filtration by angiotensin	Biological Process	GO:0003106	1	1	1438	17840	0.000695410292072323	5.60538116591928e-05	8.060538e-02	0.6731420	hsa:1535,CYBA,1535:up	http://amigo.geneontology.org/cgi-bin/amigo/term_details?term=GO:0003106
neural fold elevation formation	Biological Process	GO:0021502	1	1	1438	17840	0.000695410292072323	5.60538116591928e-05	8.060538e-02	0.6731420	hsa:3091,HIF1A,3091:up	http://amigo.geneontology.org/cgi-bin/amigo/term_details?term=GO:0021502
regulation of skeletal muscle contraction via regulation of action potential	Biological Process	GO:0014861	1	1	1438	17840	0.000695410292072323	5.60538116591928e-05	8.060538e-02	0.6731420	hsa:3759,KCNJ2,3759:down	http://amigo.geneontology.org/cgi-bin/amigo/term_details?term=GO:0014861
positive regulation of potassium ion export across plasma membrane	Biological Process	GO:1903766	1	1	1438	17840	0.000695410292072323	5.60538116591928e-05	8.060538e-02	0.6731420	hsa:4878,NPPA,4878:up	http://amigo.geneontology.org/cgi-bin/amigo/term_details?term=GO:1903766
regulation of interleukin-4-mediated signaling pathway	Biological Process	GO:1902214	1	1	1438	17840	0.000695410292072323	5.60538116591928e-05	8.060538e-02	0.6731420	hsa:5771,PTPN2,5771:up	http://amigo.geneontology.org/cgi-bin/amigo/term_details?term=GO:1902214
regulation of skeletal muscle contraction by action potential	Biological Process	GO:0100001	1	1	1438	17840	0.000695410292072323	5.60538116591928e-05	8.060538e-02	0.6731420	hsa:3759,KCNJ2,3759:down	http://amigo.geneontology.org/cgi-bin/amigo/term_details?term=GO:0100001
regulation of metanephric comma-shaped body morphogenesis	Biological Process	GO:2000006	1	1	1438	17840	0.000695410292072323	5.60538116591928e-05	8.060538e-02	0.6731420	hsa:652,BMP4,652:down	http://amigo.geneontology.org/cgi-bin/amigo/term_details?term=GO:2000006
negative regulation of interleukin-4-mediated signaling pathway	Biological Process	GO:1902215	1	1	1438	17840	0.000695410292072323	5.60538116591928e-05	8.060538e-02	0.6731420	hsa:5771,PTPN2,5771:up	http://amigo.geneontology.org/cgi-bin/amigo/term_details?term=GO:1902215
positive regulation of trophectodermal cell proliferation	Biological Process	GO:1904075	1	1	1438	17840	0.000695410292072323	5.60538116591928e-05	8.060538e-02	0.6731420	hsa:3479,IGF1,3479:down	http://amigo.geneontology.org/cgi-bin/amigo/term_details?term=GO:1904075
regulation of cytokinetic process	Biological Process	GO:0032954	1	1	1438	17840	0.000695410292072323	5.60538116591928e-05	8.060538e-02	0.6731420	hsa:9585,KIF20B,9585:up	http://amigo.geneontology.org/cgi-bin/amigo/term_details?term=GO:0032954
quorum sensing involved in interaction with host	Biological Process	GO:0052106	1	1	1438	17840	0.000695410292072323	5.60538116591928e-05	8.060538e-02	0.6731420	hsa:6584,SLC22A5,6584:up	http://amigo.geneontology.org/cgi-bin/amigo/term_details?term=GO:0052106
eosinophil extravasation	Biological Process	GO:0072682	1	1	1438	17840	0.000695410292072323	5.60538116591928e-05	8.060538e-02	0.6731420	hsa:5734,PTGER4,5734:up	http://amigo.geneontology.org/cgi-bin/amigo/term_details?term=GO:0072682
regulation of histone H3-K36 trimethylation	Biological Process	GO:2001253	1	1	1438	17840	0.000695410292072323	5.60538116591928e-05	8.060538e-02	0.6731420	hsa:55677,IWS1,55677:up	http://amigo.geneontology.org/cgi-bin/amigo/term_details?term=GO:2001253
pancreatic epsilon cell differentiation	Biological Process	GO:0090104	1	1	1438	17840	0.000695410292072323	5.60538116591928e-05	8.060538e-02	0.6731420	hsa:222546,RFX6,222546:down	http://amigo.geneontology.org/cgi-bin/amigo/term_details?term=GO:0090104
smooth muscle hypertrophy	Biological Process	GO:0014895	1	1	1438	17840	0.000695410292072323	5.60538116591928e-05	8.060538e-02	0.6731420	hsa:1535,CYBA,1535:up	http://amigo.geneontology.org/cgi-bin/amigo/term_details?term=GO:0014895
negative regulation of eosinophil extravasation	Biological Process	GO:2000420	1	1	1438	17840	0.000695410292072323	5.60538116591928e-05	8.060538e-02	0.6731420	hsa:5734,PTGER4,5734:up	http://amigo.geneontology.org/cgi-bin/amigo/term_details?term=GO:2000420
phytosphingosine biosynthetic process	Biological Process	GO:0071602	1	1	1438	17840	0.000695410292072323	5.60538116591928e-05	8.060538e-02	0.6731420	hsa:55331,ACER3,55331:up	http://amigo.geneontology.org/cgi-bin/amigo/term_details?term=GO:0071602
response to cyanide	Biological Process	GO:1903927	1	1	1438	17840	0.000695410292072323	5.60538116591928e-05	8.060538e-02	0.6731420	hsa:3091,HIF1A,3091:up	http://amigo.geneontology.org/cgi-bin/amigo/term_details?term=GO:1903927
regulation of transcription from RNA polymerase II promoter involved in mesonephros development	Biological Process	GO:0061216	1	1	1438	17840	0.000695410292072323	5.60538116591928e-05	8.060538e-02	0.6731420	hsa:652,BMP4,652:down	http://amigo.geneontology.org/cgi-bin/amigo/term_details?term=GO:0061216
positive regulation of pro-T cell differentiation	Biological Process	GO:2000176	1	1	1438	17840	0.000695410292072323	5.60538116591928e-05	8.060538e-02	0.6731420	hsa:22890,ZBTB1,22890:up	http://amigo.geneontology.org/cgi-bin/amigo/term_details?term=GO:2000176
regulation of DNA-templated transcription, termination	Biological Process	GO:0031554	1	1	1438	17840	0.000695410292072323	5.60538116591928e-05	8.060538e-02	0.6731420	hsa:23064,SETX,23064:up	http://amigo.geneontology.org/cgi-bin/amigo/term_details?term=GO:0031554
modulation by symbiont of host catalytic activity	Biological Process	GO:0052148	1	1	1438	17840	0.000695410292072323	5.60538116591928e-05	8.060538e-02	0.6731420	hsa:841,CASP8,841:up	http://amigo.geneontology.org/cgi-bin/amigo/term_details?term=GO:0052148
cellular response to iron(III) ion	Biological Process	GO:0071283	1	1	1438	17840	0.000695410292072323	5.60538116591928e-05	8.060538e-02	0.6731420	hsa:891,CCNB1,891:up	http://amigo.geneontology.org/cgi-bin/amigo/term_details?term=GO:0071283
adrenergic receptor signaling pathway involved in cardiac muscle relaxation	Biological Process	GO:0086030	1	1	1438	17840	0.000695410292072323	5.60538116591928e-05	8.060538e-02	0.6731420	hsa:1113,CHGA,1113:up	http://amigo.geneontology.org/cgi-bin/amigo/term_details?term=GO:0086030
glycolysis from storage polysaccharide	Biological Process	GO:0093001	1	1	1438	17840	0.000695410292072323	5.60538116591928e-05	8.060538e-02	0.6731420	hsa:5213,PFKM,5213:up	http://amigo.geneontology.org/cgi-bin/amigo/term_details?term=GO:0093001
regulation of response to DNA integrity checkpoint signaling	Biological Process	GO:1902151	1	1	1438	17840	0.000695410292072323	5.60538116591928e-05	8.060538e-02	0.6731420	hsa:57103,TIGAR,57103:up	http://amigo.geneontology.org/cgi-bin/amigo/term_details?term=GO:1902151
regulation of termination of RNA polymerase II transcription, poly(A)-coupled	Biological Process	GO:2000804	1	1	1438	17840	0.000695410292072323	5.60538116591928e-05	8.060538e-02	0.6731420	hsa:23064,SETX,23064:up	http://amigo.geneontology.org/cgi-bin/amigo/term_details?term=GO:2000804
lysine import	Biological Process	GO:0034226	1	1	1438	17840	0.000695410292072323	5.60538116591928e-05	8.060538e-02	0.6731420	hsa:6542,SLC7A2,6542:up	http://amigo.geneontology.org/cgi-bin/amigo/term_details?term=GO:0034226
post-embryonic limb morphogenesis	Biological Process	GO:0035127	1	1	1438	17840	0.000695410292072323	5.60538116591928e-05	8.060538e-02	0.6731420	hsa:546,ATRX,546:up	http://amigo.geneontology.org/cgi-bin/amigo/term_details?term=GO:0035127
positive regulation of termination of RNA polymerase II transcription, poly(A)-coupled	Biological Process	GO:2000806	1	1	1438	17840	0.000695410292072323	5.60538116591928e-05	8.060538e-02	0.6731420	hsa:23064,SETX,23064:up	http://amigo.geneontology.org/cgi-bin/amigo/term_details?term=GO:2000806
modulation by virus of host catalytic activity	Biological Process	GO:0039516	1	1	1438	17840	0.000695410292072323	5.60538116591928e-05	8.060538e-02	0.6731420	hsa:841,CASP8,841:up	http://amigo.geneontology.org/cgi-bin/amigo/term_details?term=GO:0039516
menstruation	Biological Process	GO:0042703	1	1	1438	17840	0.000695410292072323	5.60538116591928e-05	8.060538e-02	0.6731420	hsa:668,FOXL2,668:up	http://amigo.geneontology.org/cgi-bin/amigo/term_details?term=GO:0042703
chemokine receptor transport out of membrane raft	Biological Process	GO:0032600	1	1	1438	17840	0.000695410292072323	5.60538116591928e-05	8.060538e-02	0.6731420	hsa:100133941,CD24,100133941:up	http://amigo.geneontology.org/cgi-bin/amigo/term_details?term=GO:0032600
positive regulation of myosin-light-chain-phosphatase activity	Biological Process	GO:0035508	1	1	1438	17840	0.000695410292072323	5.60538116591928e-05	8.060538e-02	0.6731420	hsa:4659,PPP1R12A,4659:up	http://amigo.geneontology.org/cgi-bin/amigo/term_details?term=GO:0035508
negative regulation of tyrosine phosphorylation of Stat1 protein	Biological Process	GO:0042512	1	1	1438	17840	0.000695410292072323	5.60538116591928e-05	8.060538e-02	0.6731420	hsa:5771,PTPN2,5771:up	http://amigo.geneontology.org/cgi-bin/amigo/term_details?term=GO:0042512
carnitine catabolic process	Biological Process	GO:0042413	1	1	1438	17840	0.000695410292072323	5.60538116591928e-05	8.060538e-02	0.6731420	hsa:33,ACADL,33:down	http://amigo.geneontology.org/cgi-bin/amigo/term_details?term=GO:0042413
regulation of eIF2 alpha phosphorylation by dsRNA	Biological Process	GO:0060735	1	1	1438	17840	0.000695410292072323	5.60538116591928e-05	8.060538e-02	0.6731420	hsa:4869,NPM1,4869:up	http://amigo.geneontology.org/cgi-bin/amigo/term_details?term=GO:0060735
mitochondrial iron ion transport	Biological Process	GO:0048250	1	1	1438	17840	0.000695410292072323	5.60538116591928e-05	8.060538e-02	0.6731420	hsa:51312,SLC25A37,51312:up	http://amigo.geneontology.org/cgi-bin/amigo/term_details?term=GO:0048250
cytoplasmic sequestering of CFTR protein	Biological Process	GO:0043004	1	1	1438	17840	0.000695410292072323	5.60538116591928e-05	8.060538e-02	0.6731420	hsa:57120,GOPC,57120:up	http://amigo.geneontology.org/cgi-bin/amigo/term_details?term=GO:0043004
negative regulation of renal output by angiotensin	Biological Process	GO:0003083	1	1	1438	17840	0.000695410292072323	5.60538116591928e-05	8.060538e-02	0.6731420	hsa:1535,CYBA,1535:up	http://amigo.geneontology.org/cgi-bin/amigo/term_details?term=GO:0003083
histone-tyrosine phosphorylation	Biological Process	GO:0035406	1	1	1438	17840	0.000695410292072323	5.60538116591928e-05	8.060538e-02	0.6731420	hsa:3717,JAK2,3717:up	http://amigo.geneontology.org/cgi-bin/amigo/term_details?term=GO:0035406
negative regulation of branch elongation involved in ureteric bud branching by BMP signaling pathway	Biological Process	GO:0072097	1	1	1438	17840	0.000695410292072323	5.60538116591928e-05	8.060538e-02	0.6731420	hsa:652,BMP4,652:down	http://amigo.geneontology.org/cgi-bin/amigo/term_details?term=GO:0072097
keratinocyte activation	Biological Process	GO:0032980	1	1	1438	17840	0.000695410292072323	5.60538116591928e-05	8.060538e-02	0.6731420	hsa:3849,KRT2,3849:down	http://amigo.geneontology.org/cgi-bin/amigo/term_details?term=GO:0032980
positive regulation of hematopoietic stem cell differentiation	Biological Process	GO:1902038	1	1	1438	17840	0.000695410292072323	5.60538116591928e-05	8.060538e-02	0.6731420	hsa:2296,FOXC1,2296:up	http://amigo.geneontology.org/cgi-bin/amigo/term_details?term=GO:1902038
regulation of collecting lymphatic vessel constriction	Biological Process	GO:1903814	1	1	1438	17840	0.000695410292072323	5.60538116591928e-05	8.060538e-02	0.6731420	hsa:4878,NPPA,4878:up	http://amigo.geneontology.org/cgi-bin/amigo/term_details?term=GO:1903814
positive regulation of histone H4-K20 methylation	Biological Process	GO:0070512	1	1	1438	17840	0.000695410292072323	5.60538116591928e-05	8.060538e-02	0.6731420	hsa:672,BRCA1,672:up	http://amigo.geneontology.org/cgi-bin/amigo/term_details?term=GO:0070512
negative regulation of chaperone-mediated protein folding	Biological Process	GO:1903645	1	1	1438	17840	0.000695410292072323	5.60538116591928e-05	8.060538e-02	0.6731420	hsa:9141,PDCD5,9141:up	http://amigo.geneontology.org/cgi-bin/amigo/term_details?term=GO:1903645
regulation of telomeric RNA transcription from RNA pol II promoter	Biological Process	GO:1901580	1	1	1438	17840	0.000695410292072323	5.60538116591928e-05	8.060538e-02	0.6731420	hsa:546,ATRX,546:up	http://amigo.geneontology.org/cgi-bin/amigo/term_details?term=GO:1901580
regulation of transcription during meiosis	Biological Process	GO:0051037	1	1	1438	17840	0.000695410292072323	5.60538116591928e-05	8.060538e-02	0.6731420	hsa:676,BRDT,676:down	http://amigo.geneontology.org/cgi-bin/amigo/term_details?term=GO:0051037
cyclic threonylcarbamoyladenosine biosynthetic process	Biological Process	GO:0061504	1	1	1438	17840	0.000695410292072323	5.60538116591928e-05	8.060538e-02	0.6731420	hsa:79876,UBA5,79876:up	http://amigo.geneontology.org/cgi-bin/amigo/term_details?term=GO:0061504
regulation of Golgi to plasma membrane CFTR protein transport	Biological Process	GO:0042999	1	1	1438	17840	0.000695410292072323	5.60538116591928e-05	8.060538e-02	0.6731420	hsa:57120,GOPC,57120:up	http://amigo.geneontology.org/cgi-bin/amigo/term_details?term=GO:0042999
cornified envelope assembly	Biological Process	GO:1903575	1	1	1438	17840	0.000695410292072323	5.60538116591928e-05	8.060538e-02	0.6731420	hsa:2054,STX2,2054:up	http://amigo.geneontology.org/cgi-bin/amigo/term_details?term=GO:1903575
sodium ion import into cell	Biological Process	GO:1990118	1	1	1438	17840	0.000695410292072323	5.60538116591928e-05	8.060538e-02	0.6731420	hsa:6548,SLC9A1,6548:down	http://amigo.geneontology.org/cgi-bin/amigo/term_details?term=GO:1990118
planar cell polarity pathway involved in cardiac muscle tissue morphogenesis	Biological Process	GO:0061350	1	1	1438	17840	0.000695410292072323	5.60538116591928e-05	8.060538e-02	0.6731420	hsa:7474,WNT5A,7474:up	http://amigo.geneontology.org/cgi-bin/amigo/term_details?term=GO:0061350
negative regulation of interleukin-2-mediated signaling pathway	Biological Process	GO:1902206	1	1	1438	17840	0.000695410292072323	5.60538116591928e-05	8.060538e-02	0.6731420	hsa:5771,PTPN2,5771:up	http://amigo.geneontology.org/cgi-bin/amigo/term_details?term=GO:1902206
actin phosphorylation	Biological Process	GO:0031289	1	1	1438	17840	0.000695410292072323	5.60538116591928e-05	8.060538e-02	0.6731420	hsa:5756,TWF1,5756:up	http://amigo.geneontology.org/cgi-bin/amigo/term_details?term=GO:0031289
kinesis	Biological Process	GO:0042465	1	1	1438	17840	0.000695410292072323	5.60538116591928e-05	8.060538e-02	0.6731420	hsa:5734,PTGER4,5734:up	http://amigo.geneontology.org/cgi-bin/amigo/term_details?term=GO:0042465
cellular response to triglyceride	Biological Process	GO:0071401	1	1	1438	17840	0.000695410292072323	5.60538116591928e-05	8.060538e-02	0.6731420	hsa:2822,GPLD1,2822:down	http://amigo.geneontology.org/cgi-bin/amigo/term_details?term=GO:0071401
regulation of SREBP signaling pathway	Biological Process	GO:2000638	1	1	1438	17840	0.000695410292072323	5.60538116591928e-05	8.060538e-02	0.6731420	hsa:55294,FBXW7,55294:down	http://amigo.geneontology.org/cgi-bin/amigo/term_details?term=GO:2000638
negative regulation of potassium ion export	Biological Process	GO:1902303	1	1	1438	17840	0.000695410292072323	5.60538116591928e-05	8.060538e-02	0.6731420	hsa:3757,KCNH2,3757:up	http://amigo.geneontology.org/cgi-bin/amigo/term_details?term=GO:1902303
L-lysine import into cell	Biological Process	GO:1903410	1	1	1438	17840	0.000695410292072323	5.60538116591928e-05	8.060538e-02	0.6731420	hsa:6542,SLC7A2,6542:up	http://amigo.geneontology.org/cgi-bin/amigo/term_details?term=GO:1903410
positive regulation of prolactin secretion	Biological Process	GO:1902722	1	1	1438	17840	0.000695410292072323	5.60538116591928e-05	8.060538e-02	0.6731420	hsa:18,ABAT,18:up	http://amigo.geneontology.org/cgi-bin/amigo/term_details?term=GO:1902722
somatic sex determination	Biological Process	GO:0018993	1	1	1438	17840	0.000695410292072323	5.60538116591928e-05	8.060538e-02	0.6731420	hsa:668,FOXL2,668:up	http://amigo.geneontology.org/cgi-bin/amigo/term_details?term=GO:0018993
negative regulation of cell proliferation involved in heart morphogenesis	Biological Process	GO:2000137	1	1	1438	17840	0.000695410292072323	5.60538116591928e-05	8.060538e-02	0.6731420	hsa:652,BMP4,652:down	http://amigo.geneontology.org/cgi-bin/amigo/term_details?term=GO:2000137
response to anesthetic	Biological Process	GO:0072347	1	1	1438	17840	0.000695410292072323	5.60538116591928e-05	8.060538e-02	0.6731420	hsa:3091,HIF1A,3091:up	http://amigo.geneontology.org/cgi-bin/amigo/term_details?term=GO:0072347
regulation of response to DNA damage checkpoint signaling	Biological Process	GO:1902153	1	1	1438	17840	0.000695410292072323	5.60538116591928e-05	8.060538e-02	0.6731420	hsa:57103,TIGAR,57103:up	http://amigo.geneontology.org/cgi-bin/amigo/term_details?term=GO:1902153
negative regulation of asymmetric cell division	Biological Process	GO:0045769	1	1	1438	17840	0.000695410292072323	5.60538116591928e-05	8.060538e-02	0.6731420	hsa:259266,ASPM,259266:up	http://amigo.geneontology.org/cgi-bin/amigo/term_details?term=GO:0045769
response to melanocyte-stimulating hormone	Biological Process	GO:1990680	1	1	1438	17840	0.000695410292072323	5.60538116591928e-05	8.060538e-02	0.6731420	hsa:4925,NUCB2,4925:up	http://amigo.geneontology.org/cgi-bin/amigo/term_details?term=GO:1990680
negative regulation of SREBP signaling pathway	Biological Process	GO:2000639	1	1	1438	17840	0.000695410292072323	5.60538116591928e-05	8.060538e-02	0.6731420	hsa:55294,FBXW7,55294:down	http://amigo.geneontology.org/cgi-bin/amigo/term_details?term=GO:2000639
riboflavin biosynthetic process	Biological Process	GO:0009231	1	1	1438	17840	0.000695410292072323	5.60538116591928e-05	8.060538e-02	0.6731420	hsa:55312,RFK,55312:up	http://amigo.geneontology.org/cgi-bin/amigo/term_details?term=GO:0009231
anterior/posterior pattern specification involved in ureteric bud development	Biological Process	GO:0072099	1	1	1438	17840	0.000695410292072323	5.60538116591928e-05	8.060538e-02	0.6731420	hsa:652,BMP4,652:down	http://amigo.geneontology.org/cgi-bin/amigo/term_details?term=GO:0072099
L-lysine import across plasma membrane	Biological Process	GO:0097639	1	1	1438	17840	0.000695410292072323	5.60538116591928e-05	8.060538e-02	0.6731420	hsa:6542,SLC7A2,6542:up	http://amigo.geneontology.org/cgi-bin/amigo/term_details?term=GO:0097639
collecting lymphatic vessel constriction	Biological Process	GO:1990192	1	1	1438	17840	0.000695410292072323	5.60538116591928e-05	8.060538e-02	0.6731420	hsa:4878,NPPA,4878:up	http://amigo.geneontology.org/cgi-bin/amigo/term_details?term=GO:1990192
regulation of trophectodermal cell proliferation	Biological Process	GO:1904073	1	1	1438	17840	0.000695410292072323	5.60538116591928e-05	8.060538e-02	0.6731420	hsa:3479,IGF1,3479:down	http://amigo.geneontology.org/cgi-bin/amigo/term_details?term=GO:1904073
positive regulation of heterochromatin assembly	Biological Process	GO:0031453	1	1	1438	17840	0.000695410292072323	5.60538116591928e-05	8.060538e-02	0.6731420	hsa:7175,TPR,7175:up	http://amigo.geneontology.org/cgi-bin/amigo/term_details?term=GO:0031453
phytosphingosine metabolic process	Biological Process	GO:0006671	1	1	1438	17840	0.000695410292072323	5.60538116591928e-05	8.060538e-02	0.6731420	hsa:55331,ACER3,55331:up	http://amigo.geneontology.org/cgi-bin/amigo/term_details?term=GO:0006671
translocation of molecules into other organism involved in symbiotic interaction	Biological Process	GO:0051836	1	1	1438	17840	0.000695410292072323	5.60538116591928e-05	8.060538e-02	0.6731420	hsa:6950,TCP1,6950:up	http://amigo.geneontology.org/cgi-bin/amigo/term_details?term=GO:0051836
regulation of lymphatic vessel size	Biological Process	GO:1990186	1	1	1438	17840	0.000695410292072323	5.60538116591928e-05	8.060538e-02	0.6731420	hsa:4878,NPPA,4878:up	http://amigo.geneontology.org/cgi-bin/amigo/term_details?term=GO:1990186
locus ceruleus development	Biological Process	GO:0021703	1	1	1438	17840	0.000695410292072323	5.60538116591928e-05	8.060538e-02	0.6731420	hsa:401,PHOX2A,401:up	http://amigo.geneontology.org/cgi-bin/amigo/term_details?term=GO:0021703
negative regulation of mesenchymal cell proliferation involved in ureter development	Biological Process	GO:0072200	1	1	1438	17840	0.000695410292072323	5.60538116591928e-05	8.060538e-02	0.6731420	hsa:652,BMP4,652:down	http://amigo.geneontology.org/cgi-bin/amigo/term_details?term=GO:0072200
female somatic sex determination	Biological Process	GO:0019101	1	1	1438	17840	0.000695410292072323	5.60538116591928e-05	8.060538e-02	0.6731420	hsa:668,FOXL2,668:up	http://amigo.geneontology.org/cgi-bin/amigo/term_details?term=GO:0019101
positive regulation of fast-twitch skeletal muscle fiber contraction	Biological Process	GO:0031448	1	1	1438	17840	0.000695410292072323	5.60538116591928e-05	8.060538e-02	0.6731420	hsa:487,ATP2A1,487:up	http://amigo.geneontology.org/cgi-bin/amigo/term_details?term=GO:0031448
regulation of fast-twitch skeletal muscle fiber contraction	Biological Process	GO:0031446	1	1	1438	17840	0.000695410292072323	5.60538116591928e-05	8.060538e-02	0.6731420	hsa:487,ATP2A1,487:up	http://amigo.geneontology.org/cgi-bin/amigo/term_details?term=GO:0031446
regulation of response to cell cycle checkpoint signaling	Biological Process	GO:1902145	1	1	1438	17840	0.000695410292072323	5.60538116591928e-05	8.060538e-02	0.6731420	hsa:57103,TIGAR,57103:up	http://amigo.geneontology.org/cgi-bin/amigo/term_details?term=GO:1902145
negative regulation of renal phosphate excretion	Biological Process	GO:1903403	1	1	1438	17840	0.000695410292072323	5.60538116591928e-05	8.060538e-02	0.6731420	hsa:6781,STC1,6781:up	http://amigo.geneontology.org/cgi-bin/amigo/term_details?term=GO:1903403
L-arginine import into cell	Biological Process	GO:1902765	1	1	1438	17840	0.000695410292072323	5.60538116591928e-05	8.060538e-02	0.6731420	hsa:6542,SLC7A2,6542:up	http://amigo.geneontology.org/cgi-bin/amigo/term_details?term=GO:1902765
pyridoxal phosphate catabolic process	Biological Process	GO:0032361	1	1	1438	17840	0.000695410292072323	5.60538116591928e-05	8.060538e-02	0.6731420	hsa:57026,PDXP,57026:up	http://amigo.geneontology.org/cgi-bin/amigo/term_details?term=GO:0032361
transport of viral material towards nucleus	Biological Process	GO:0075606	1	1	1438	17840	0.000695410292072323	5.60538116591928e-05	8.060538e-02	0.6731420	hsa:6993,DYNLT1,6993:up	http://amigo.geneontology.org/cgi-bin/amigo/term_details?term=GO:0075606
positive regulation of transcription during meiosis	Biological Process	GO:0051039	1	1	1438	17840	0.000695410292072323	5.60538116591928e-05	8.060538e-02	0.6731420	hsa:676,BRDT,676:down	http://amigo.geneontology.org/cgi-bin/amigo/term_details?term=GO:0051039
FMN metabolic process	Biological Process	GO:0046444	1	1	1438	17840	0.000695410292072323	5.60538116591928e-05	8.060538e-02	0.6731420	hsa:55312,RFK,55312:up	http://amigo.geneontology.org/cgi-bin/amigo/term_details?term=GO:0046444
planar cell polarity pathway involved in cardiac right atrium morphogenesis	Biological Process	GO:0061349	1	1	1438	17840	0.000695410292072323	5.60538116591928e-05	8.060538e-02	0.6731420	hsa:7474,WNT5A,7474:up	http://amigo.geneontology.org/cgi-bin/amigo/term_details?term=GO:0061349
translocation of peptides or proteins into host	Biological Process	GO:0042000	1	1	1438	17840	0.000695410292072323	5.60538116591928e-05	8.060538e-02	0.6731420	hsa:6950,TCP1,6950:up	http://amigo.geneontology.org/cgi-bin/amigo/term_details?term=GO:0042000
negative regulation of establishment of endothelial barrier	Biological Process	GO:1903141	1	1	1438	17840	0.000695410292072323	5.60538116591928e-05	8.060538e-02	0.6731420	hsa:1903,S1PR3,1903:up	http://amigo.geneontology.org/cgi-bin/amigo/term_details?term=GO:1903141
positive regulation of bile acid biosynthetic process	Biological Process	GO:0070859	1	1	1438	17840	0.000695410292072323	5.60538116591928e-05	8.060538e-02	0.6731420	hsa:9572,NR1D1,9572:down	http://amigo.geneontology.org/cgi-bin/amigo/term_details?term=GO:0070859
negative regulation of metanephric comma-shaped body morphogenesis	Biological Process	GO:2000007	1	1	1438	17840	0.000695410292072323	5.60538116591928e-05	8.060538e-02	0.6731420	hsa:652,BMP4,652:down	http://amigo.geneontology.org/cgi-bin/amigo/term_details?term=GO:2000007
negative regulation of NAD metabolic process	Biological Process	GO:1902689	1	1	1438	17840	0.000695410292072323	5.60538116591928e-05	8.060538e-02	0.6731420	hsa:57103,TIGAR,57103:up	http://amigo.geneontology.org/cgi-bin/amigo/term_details?term=GO:1902689
attachment of spindle microtubules to kinetochore involved in meiotic chromosome segregation	Biological Process	GO:0051316	1	1	1438	17840	0.000695410292072323	5.60538116591928e-05	8.060538e-02	0.6731420	hsa:675,BRCA2,675:up	http://amigo.geneontology.org/cgi-bin/amigo/term_details?term=GO:0051316
FMN biosynthetic process	Biological Process	GO:0009398	1	1	1438	17840	0.000695410292072323	5.60538116591928e-05	8.060538e-02	0.6731420	hsa:55312,RFK,55312:up	http://amigo.geneontology.org/cgi-bin/amigo/term_details?term=GO:0009398
exon-exon junction complex disassembly	Biological Process	GO:1903259	1	1	1438	17840	0.000695410292072323	5.60538116591928e-05	8.060538e-02	0.6731420	hsa:84305,PYM1,84305:down	http://amigo.geneontology.org/cgi-bin/amigo/term_details?term=GO:1903259
negative regulation by symbiont of host catalytic activity	Biological Process	GO:0052053	1	1	1438	17840	0.000695410292072323	5.60538116591928e-05	8.060538e-02	0.6731420	hsa:841,CASP8,841:up	http://amigo.geneontology.org/cgi-bin/amigo/term_details?term=GO:0052053
regulation of protein import into mitochondrial outer membrane	Biological Process	GO:1903636	1	1	1438	17840	0.000695410292072323	5.60538116591928e-05	8.060538e-02	0.6731420	hsa:9141,PDCD5,9141:up	http://amigo.geneontology.org/cgi-bin/amigo/term_details?term=GO:1903636
negative regulation of endothelial cell development	Biological Process	GO:1901551	1	1	1438	17840	0.000695410292072323	5.60538116591928e-05	8.060538e-02	0.6731420	hsa:1903,S1PR3,1903:up	http://amigo.geneontology.org/cgi-bin/amigo/term_details?term=GO:1901551
regulation of cyclin-dependent protein serine/threonine kinase activity involved in G2/M transition of mitotic cell cycle	Biological Process	GO:0031660	1	1	1438	17840	0.000695410292072323	5.60538116591928e-05	8.060538e-02	0.6731420	hsa:3306,HSPA2,3306:down	http://amigo.geneontology.org/cgi-bin/amigo/term_details?term=GO:0031660
lysine biosynthetic process	Biological Process	GO:0009085	1	1	1438	17840	0.000695410292072323	5.60538116591928e-05	8.060538e-02	0.6731420	hsa:60496,AASDHPPT,60496:up	http://amigo.geneontology.org/cgi-bin/amigo/term_details?term=GO:0009085
lysine biosynthetic process via aminoadipic acid	Biological Process	GO:0019878	1	1	1438	17840	0.000695410292072323	5.60538116591928e-05	8.060538e-02	0.6731420	hsa:60496,AASDHPPT,60496:up	http://amigo.geneontology.org/cgi-bin/amigo/term_details?term=GO:0019878
telomeric RNA transcription from RNA pol II promoter	Biological Process	GO:0097394	1	1	1438	17840	0.000695410292072323	5.60538116591928e-05	8.060538e-02	0.6731420	hsa:546,ATRX,546:up	http://amigo.geneontology.org/cgi-bin/amigo/term_details?term=GO:0097394
quorum sensing	Biological Process	GO:0009372	1	1	1438	17840	0.000695410292072323	5.60538116591928e-05	8.060538e-02	0.6731420	hsa:6584,SLC22A5,6584:up	http://amigo.geneontology.org/cgi-bin/amigo/term_details?term=GO:0009372
pantothenate transmembrane transport	Biological Process	GO:0015887	1	1	1438	17840	0.000695410292072323	5.60538116591928e-05	8.060538e-02	0.6731420	hsa:8884,SLC5A6,8884:up	http://amigo.geneontology.org/cgi-bin/amigo/term_details?term=GO:0015887
positive regulation of heart rate by epinephrine	Biological Process	GO:0003065	1	1	1438	17840	0.000695410292072323	5.60538116591928e-05	8.060538e-02	0.6731420	hsa:7168,TPM1,7168:up	http://amigo.geneontology.org/cgi-bin/amigo/term_details?term=GO:0003065
positive regulation of intestinal epithelial structure maintenance	Biological Process	GO:0060731	1	1	1438	17840	0.000695410292072323	5.60538116591928e-05	8.060538e-02	0.6731420	hsa:6584,SLC22A5,6584:up	http://amigo.geneontology.org/cgi-bin/amigo/term_details?term=GO:0060731
attachment of spindle microtubules to kinetochore involved in homologous chromosome segregation	Biological Process	GO:0051455	1	1	1438	17840	0.000695410292072323	5.60538116591928e-05	8.060538e-02	0.6731420	hsa:675,BRCA2,675:up	http://amigo.geneontology.org/cgi-bin/amigo/term_details?term=GO:0051455
negative regulation of phosphatidylcholine biosynthetic process	Biological Process	GO:2001246	1	1	1438	17840	0.000695410292072323	5.60538116591928e-05	8.060538e-02	0.6731420	hsa:79888,LPCAT1,79888:up	http://amigo.geneontology.org/cgi-bin/amigo/term_details?term=GO:2001246
biotin transport	Biological Process	GO:0015878	1	1	1438	17840	0.000695410292072323	5.60538116591928e-05	8.060538e-02	0.6731420	hsa:8884,SLC5A6,8884:up	http://amigo.geneontology.org/cgi-bin/amigo/term_details?term=GO:0015878
endocardial cushion cell fate commitment	Biological Process	GO:0061445	1	1	1438	17840	0.000695410292072323	5.60538116591928e-05	8.060538e-02	0.6731420	hsa:90,ACVR1,90:up	http://amigo.geneontology.org/cgi-bin/amigo/term_details?term=GO:0061445
chemokine receptor transport within lipid bilayer	Biological Process	GO:0033606	1	1	1438	17840	0.000695410292072323	5.60538116591928e-05	8.060538e-02	0.6731420	hsa:100133941,CD24,100133941:up	http://amigo.geneontology.org/cgi-bin/amigo/term_details?term=GO:0033606
regulation of transcription from RNA polymerase II promoter involved in kidney development	Biological Process	GO:0060994	1	1	1438	17840	0.000695410292072323	5.60538116591928e-05	8.060538e-02	0.6731420	hsa:652,BMP4,652:down	http://amigo.geneontology.org/cgi-bin/amigo/term_details?term=GO:0060994
translocation of molecules into host	Biological Process	GO:0044417	1	1	1438	17840	0.000695410292072323	5.60538116591928e-05	8.060538e-02	0.6731420	hsa:6950,TCP1,6950:up	http://amigo.geneontology.org/cgi-bin/amigo/term_details?term=GO:0044417
lateral sprouting involved in mammary gland duct morphogenesis	Biological Process	GO:0060599	1	1	1438	17840	0.000695410292072323	5.60538116591928e-05	8.060538e-02	0.6731420	hsa:7474,WNT5A,7474:up	http://amigo.geneontology.org/cgi-bin/amigo/term_details?term=GO:0060599
intermediate mesodermal cell differentiation	Biological Process	GO:0048392	1	1	1438	17840	0.000695410292072323	5.60538116591928e-05	8.060538e-02	0.6731420	hsa:652,BMP4,652:down	http://amigo.geneontology.org/cgi-bin/amigo/term_details?term=GO:0048392
homeostasis of number of cells in a free-living population	Biological Process	GO:0048874	1	1	1438	17840	0.000695410292072323	5.60538116591928e-05	8.060538e-02	0.6731420	hsa:6584,SLC22A5,6584:up	http://amigo.geneontology.org/cgi-bin/amigo/term_details?term=GO:0048874
regulation of pyruvate dehydrogenase activity	Biological Process	GO:1904182	1	1	1438	17840	0.000695410292072323	5.60538116591928e-05	8.060538e-02	0.6731420	hsa:23409,SIRT4,23409:up	http://amigo.geneontology.org/cgi-bin/amigo/term_details?term=GO:1904182
suppression by virus of host cysteine-type endopeptidase activity involved in apoptotic process	Biological Process	GO:0039650	1	1	1438	17840	0.000695410292072323	5.60538116591928e-05	8.060538e-02	0.6731420	hsa:841,CASP8,841:up	http://amigo.geneontology.org/cgi-bin/amigo/term_details?term=GO:0039650
rhombomere formation	Biological Process	GO:0021594	1	1	1438	17840	0.000695410292072323	5.60538116591928e-05	8.060538e-02	0.6731420	hsa:1959,EGR2,1959:up	http://amigo.geneontology.org/cgi-bin/amigo/term_details?term=GO:0021594
positive regulation of mitotic cytokinetic process	Biological Process	GO:1903438	1	1	1438	17840	0.000695410292072323	5.60538116591928e-05	8.060538e-02	0.6731420	hsa:9585,KIF20B,9585:up	http://amigo.geneontology.org/cgi-bin/amigo/term_details?term=GO:1903438
rhombomere 3 formation	Biological Process	GO:0021660	1	1	1438	17840	0.000695410292072323	5.60538116591928e-05	8.060538e-02	0.6731420	hsa:1959,EGR2,1959:up	http://amigo.geneontology.org/cgi-bin/amigo/term_details?term=GO:0021660
BMP signaling pathway involved in nephric duct formation	Biological Process	GO:0071893	1	1	1438	17840	0.000695410292072323	5.60538116591928e-05	8.060538e-02	0.6731420	hsa:652,BMP4,652:down	http://amigo.geneontology.org/cgi-bin/amigo/term_details?term=GO:0071893
post-embryonic appendage morphogenesis	Biological Process	GO:0035120	1	1	1438	17840	0.000695410292072323	5.60538116591928e-05	8.060538e-02	0.6731420	hsa:546,ATRX,546:up	http://amigo.geneontology.org/cgi-bin/amigo/term_details?term=GO:0035120
regulation of renal phosphate excretion	Biological Process	GO:1903402	1	1	1438	17840	0.000695410292072323	5.60538116591928e-05	8.060538e-02	0.6731420	hsa:6781,STC1,6781:up	http://amigo.geneontology.org/cgi-bin/amigo/term_details?term=GO:1903402
regulation of chaperone-mediated protein folding	Biological Process	GO:1903644	1	1	1438	17840	0.000695410292072323	5.60538116591928e-05	8.060538e-02	0.6731420	hsa:9141,PDCD5,9141:up	http://amigo.geneontology.org/cgi-bin/amigo/term_details?term=GO:1903644
rhombomere 5 morphogenesis	Biological Process	GO:0021664	1	1	1438	17840	0.000695410292072323	5.60538116591928e-05	8.060538e-02	0.6731420	hsa:1959,EGR2,1959:up	http://amigo.geneontology.org/cgi-bin/amigo/term_details?term=GO:0021664
histone H3-Y41 phosphorylation	Biological Process	GO:0035409	1	1	1438	17840	0.000695410292072323	5.60538116591928e-05	8.060538e-02	0.6731420	hsa:3717,JAK2,3717:up	http://amigo.geneontology.org/cgi-bin/amigo/term_details?term=GO:0035409
cardiac muscle thin filament assembly	Biological Process	GO:0071691	1	1	1438	17840	0.000695410292072323	5.60538116591928e-05	8.060538e-02	0.6731420	hsa:10529,NEBL,10529:down	http://amigo.geneontology.org/cgi-bin/amigo/term_details?term=GO:0071691
protein localization to photoreceptor connecting cilium	Biological Process	GO:1903621	1	1	1438	17840	0.000695410292072323	5.60538116591928e-05	8.060538e-02	0.6731420	hsa:55812,SPATA7,55812:up	http://amigo.geneontology.org/cgi-bin/amigo/term_details?term=GO:1903621
planar cell polarity pathway involved in pericardium morphogenesis	Biological Process	GO:0061354	1	1	1438	17840	0.000695410292072323	5.60538116591928e-05	8.060538e-02	0.6731420	hsa:7474,WNT5A,7474:up	http://amigo.geneontology.org/cgi-bin/amigo/term_details?term=GO:0061354
positive regulation of calcium-dependent cell-cell adhesion	Biological Process	GO:0046587	1	1	1438	17840	0.000695410292072323	5.60538116591928e-05	8.060538e-02	0.6731420	hsa:22920,KIFAP3,22920:up	http://amigo.geneontology.org/cgi-bin/amigo/term_details?term=GO:0046587
regulation of histone H4-K20 methylation	Biological Process	GO:0070510	1	1	1438	17840	0.000695410292072323	5.60538116591928e-05	8.060538e-02	0.6731420	hsa:672,BRCA1,672:up	http://amigo.geneontology.org/cgi-bin/amigo/term_details?term=GO:0070510
L-ornithine import into cell	Biological Process	GO:1903411	1	1	1438	17840	0.000695410292072323	5.60538116591928e-05	8.060538e-02	0.6731420	hsa:6542,SLC7A2,6542:up	http://amigo.geneontology.org/cgi-bin/amigo/term_details?term=GO:1903411
nucleus accumbens development	Biological Process	GO:0021768	1	1	1438	17840	0.000695410292072323	5.60538116591928e-05	8.060538e-02	0.6731420	hsa:220,ALDH1A3,220:up	http://amigo.geneontology.org/cgi-bin/amigo/term_details?term=GO:0021768
sodium-dependent organic cation transport	Biological Process	GO:0070715	1	1	1438	17840	0.000695410292072323	5.60538116591928e-05	8.060538e-02	0.6731420	hsa:6584,SLC22A5,6584:up	http://amigo.geneontology.org/cgi-bin/amigo/term_details?term=GO:0070715
fast-twitch skeletal muscle fiber contraction	Biological Process	GO:0031443	1	1	1438	17840	0.000695410292072323	5.60538116591928e-05	8.060538e-02	0.6731420	hsa:487,ATP2A1,487:up	http://amigo.geneontology.org/cgi-bin/amigo/term_details?term=GO:0031443
plasma membrane ATP synthesis coupled electron transport	Biological Process	GO:0042774	1	1	1438	17840	0.000695410292072323	5.60538116591928e-05	8.060538e-02	0.6731420	hsa:388753,COA6,388753:up	http://amigo.geneontology.org/cgi-bin/amigo/term_details?term=GO:0042774
regulation of eosinophil extravasation	Biological Process	GO:2000419	1	1	1438	17840	0.000695410292072323	5.60538116591928e-05	8.060538e-02	0.6731420	hsa:5734,PTGER4,5734:up	http://amigo.geneontology.org/cgi-bin/amigo/term_details?term=GO:2000419
B cell receptor transport within lipid bilayer	Biological Process	GO:0032595	1	1	1438	17840	0.000695410292072323	5.60538116591928e-05	8.060538e-02	0.6731420	hsa:100133941,CD24,100133941:up	http://amigo.geneontology.org/cgi-bin/amigo/term_details?term=GO:0032595
translocation of peptides or proteins into host cell cytoplasm	Biological Process	GO:0044053	1	1	1438	17840	0.000695410292072323	5.60538116591928e-05	8.060538e-02	0.6731420	hsa:6950,TCP1,6950:up	http://amigo.geneontology.org/cgi-bin/amigo/term_details?term=GO:0044053
DNA strand elongation involved in nuclear cell cycle DNA replication	Biological Process	GO:1902319	1	1	1438	17840	0.000695410292072323	5.60538116591928e-05	8.060538e-02	0.6731420	hsa:9837,GINS1,9837:up	http://amigo.geneontology.org/cgi-bin/amigo/term_details?term=GO:1902319
specification of ureteric bud anterior/posterior symmetry	Biological Process	GO:0072100	1	1	1438	17840	0.000695410292072323	5.60538116591928e-05	8.060538e-02	0.6731420	hsa:652,BMP4,652:down	http://amigo.geneontology.org/cgi-bin/amigo/term_details?term=GO:0072100
amino acid import across plasma membrane	Biological Process	GO:0089718	1	1	1438	17840	0.000695410292072323	5.60538116591928e-05	8.060538e-02	0.6731420	hsa:6542,SLC7A2,6542:up	http://amigo.geneontology.org/cgi-bin/amigo/term_details?term=GO:0089718
aspartate secretion	Biological Process	GO:0061528	1	1	1438	17840	0.000695410292072323	5.60538116591928e-05	8.060538e-02	0.6731420	hsa:18,ABAT,18:up	http://amigo.geneontology.org/cgi-bin/amigo/term_details?term=GO:0061528
interspecies quorum sensing	Biological Process	GO:0052097	1	1	1438	17840	0.000695410292072323	5.60538116591928e-05	8.060538e-02	0.6731420	hsa:6584,SLC22A5,6584:up	http://amigo.geneontology.org/cgi-bin/amigo/term_details?term=GO:0052097
positive regulation of cyclin-dependent protein serine/threonine kinase activity involved in G2/M transition of mitotic cell cycle	Biological Process	GO:0031662	1	1	1438	17840	0.000695410292072323	5.60538116591928e-05	8.060538e-02	0.6731420	hsa:3306,HSPA2,3306:down	http://amigo.geneontology.org/cgi-bin/amigo/term_details?term=GO:0031662
alveolar primary septum development	Biological Process	GO:0061143	1	1	1438	17840	0.000695410292072323	5.60538116591928e-05	8.060538e-02	0.6731420	hsa:64220,STRA6,64220:up	http://amigo.geneontology.org/cgi-bin/amigo/term_details?term=GO:0061143
negative regulation of metanephric S-shaped body morphogenesis	Biological Process	GO:2000005	1	1	1438	17840	0.000695410292072323	5.60538116591928e-05	8.060538e-02	0.6731420	hsa:652,BMP4,652:down	http://amigo.geneontology.org/cgi-bin/amigo/term_details?term=GO:2000005
homologous chromosome orientation involved in meiotic metaphase I plate congression	Biological Process	GO:0031619	1	1	1438	17840	0.000695410292072323	5.60538116591928e-05	8.060538e-02	0.6731420	hsa:675,BRCA2,675:up	http://amigo.geneontology.org/cgi-bin/amigo/term_details?term=GO:0031619
ureter epithelial cell differentiation	Biological Process	GO:0072192	1	1	1438	17840	0.000695410292072323	5.60538116591928e-05	8.060538e-02	0.6731420	hsa:652,BMP4,652:down	http://amigo.geneontology.org/cgi-bin/amigo/term_details?term=GO:0072192
negative regulation of positive thymic T cell selection	Biological Process	GO:1902233	1	1	1438	17840	0.000695410292072323	5.60538116591928e-05	8.060538e-02	0.6731420	hsa:5771,PTPN2,5771:up	http://amigo.geneontology.org/cgi-bin/amigo/term_details?term=GO:1902233
positive regulation of leukotriene production involved in inflammatory response	Biological Process	GO:0035491	1	1	1438	17840	0.000695410292072323	5.60538116591928e-05	8.060538e-02	0.6731420	hsa:5054,SERPINE1,5054:up	http://amigo.geneontology.org/cgi-bin/amigo/term_details?term=GO:0035491
intermediate mesoderm morphogenesis	Biological Process	GO:0048390	1	1	1438	17840	0.000695410292072323	5.60538116591928e-05	8.060538e-02	0.6731420	hsa:652,BMP4,652:down	http://amigo.geneontology.org/cgi-bin/amigo/term_details?term=GO:0048390
positive regulation of L-glutamate transport	Biological Process	GO:0002038	1	1	1438	17840	0.000695410292072323	5.60538116591928e-05	8.060538e-02	0.6731420	hsa:23204,ARL6IP1,23204:up	http://amigo.geneontology.org/cgi-bin/amigo/term_details?term=GO:0002038
cellular response to cyanide	Biological Process	GO:1903928	1	1	1438	17840	0.000695410292072323	5.60538116591928e-05	8.060538e-02	0.6731420	hsa:3091,HIF1A,3091:up	http://amigo.geneontology.org/cgi-bin/amigo/term_details?term=GO:1903928
positive regulation of mitotic cytokinesis	Biological Process	GO:1903490	1	1	1438	17840	0.000695410292072323	5.60538116591928e-05	8.060538e-02	0.6731420	hsa:9585,KIF20B,9585:up	http://amigo.geneontology.org/cgi-bin/amigo/term_details?term=GO:1903490
negative regulation of acute inflammatory response to non-antigenic stimulus	Biological Process	GO:0002878	1	1	1438	17840	0.000695410292072323	5.60538116591928e-05	8.060538e-02	0.6731420	hsa:116,ADCYAP1,116:up	http://amigo.geneontology.org/cgi-bin/amigo/term_details?term=GO:0002878
heterotrimeric G-protein complex assembly	Biological Process	GO:1902605	1	1	1438	17840	0.000695410292072323	5.60538116591928e-05	8.060538e-02	0.6731420	hsa:5082,PDCL,5082:up	http://amigo.geneontology.org/cgi-bin/amigo/term_details?term=GO:1902605
negative regulation of interleukin-1 alpha secretion	Biological Process	GO:0050712	1	1	1438	17840	0.000695410292072323	5.60538116591928e-05	8.060538e-02	0.6731420	hsa:5734,PTGER4,5734:up	http://amigo.geneontology.org/cgi-bin/amigo/term_details?term=GO:0050712
regulation of heterochromatin assembly	Biological Process	GO:0031445	1	1	1438	17840	0.000695410292072323	5.60538116591928e-05	8.060538e-02	0.6731420	hsa:7175,TPR,7175:up	http://amigo.geneontology.org/cgi-bin/amigo/term_details?term=GO:0031445
chaperone mediated protein folding independent of cofactor	Biological Process	GO:0051086	1	1	1438	17840	0.000695410292072323	5.60538116591928e-05	8.060538e-02	0.6731420	hsa:10576,CCT2,10576:up	http://amigo.geneontology.org/cgi-bin/amigo/term_details?term=GO:0051086
negative regulation of centriole-centriole cohesion	Biological Process	GO:1903126	1	1	1438	17840	0.000695410292072323	5.60538116591928e-05	8.060538e-02	0.6731420	hsa:4751,NEK2,4751:down	http://amigo.geneontology.org/cgi-bin/amigo/term_details?term=GO:1903126
negative regulation of collecting lymphatic vessel constriction	Biological Process	GO:1903815	1	1	1438	17840	0.000695410292072323	5.60538116591928e-05	8.060538e-02	0.6731420	hsa:4878,NPPA,4878:up	http://amigo.geneontology.org/cgi-bin/amigo/term_details?term=GO:1903815
protein insertion into membrane from inner side	Biological Process	GO:0032978	1	1	1438	17840	0.000695410292072323	5.60538116591928e-05	8.060538e-02	0.6731420	hsa:6557,SLC12A1,6557:down	http://amigo.geneontology.org/cgi-bin/amigo/term_details?term=GO:0032978
translocation of peptides or proteins into other organism involved in symbiotic interaction	Biological Process	GO:0051808	1	1	1438	17840	0.000695410292072323	5.60538116591928e-05	8.060538e-02	0.6731420	hsa:6950,TCP1,6950:up	http://amigo.geneontology.org/cgi-bin/amigo/term_details?term=GO:0051808
lymphatic vascular process in circulatory system	Biological Process	GO:1990183	1	1	1438	17840	0.000695410292072323	5.60538116591928e-05	8.060538e-02	0.6731420	hsa:4878,NPPA,4878:up	http://amigo.geneontology.org/cgi-bin/amigo/term_details?term=GO:1990183
pancreatic D cell differentiation	Biological Process	GO:0003311	1	1	1438	17840	0.000695410292072323	5.60538116591928e-05	8.060538e-02	0.6731420	hsa:222546,RFX6,222546:down	http://amigo.geneontology.org/cgi-bin/amigo/term_details?term=GO:0003311
calcitonin secretion	Biological Process	GO:0036161	1	1	1438	17840	0.000695410292072323	5.60538116591928e-05	8.060538e-02	0.6731420	hsa:5734,PTGER4,5734:up	http://amigo.geneontology.org/cgi-bin/amigo/term_details?term=GO:0036161
amino acid transmembrane import	Biological Process	GO:0044745	1	1	1438	17840	0.000695410292072323	5.60538116591928e-05	8.060538e-02	0.6731420	hsa:6542,SLC7A2,6542:up	http://amigo.geneontology.org/cgi-bin/amigo/term_details?term=GO:0044745
rhombomere 5 formation	Biological Process	GO:0021666	1	1	1438	17840	0.000695410292072323	5.60538116591928e-05	8.060538e-02	0.6731420	hsa:1959,EGR2,1959:up	http://amigo.geneontology.org/cgi-bin/amigo/term_details?term=GO:0021666
negative regulation of prolactin signaling pathway	Biological Process	GO:1902212	1	1	1438	17840	0.000695410292072323	5.60538116591928e-05	8.060538e-02	0.6731420	hsa:5771,PTPN2,5771:up	http://amigo.geneontology.org/cgi-bin/amigo/term_details?term=GO:1902212
intrahepatic bile duct development	Biological Process	GO:0035622	1	1	1438	17840	0.000695410292072323	5.60538116591928e-05	8.060538e-02	0.6731420	hsa:6662,SOX9,6662:up	http://amigo.geneontology.org/cgi-bin/amigo/term_details?term=GO:0035622
cellular response to tumor cell	Biological Process	GO:0071228	1	1	1438	17840	0.000695410292072323	5.60538116591928e-05	8.060538e-02	0.6731420	hsa:10628,TXNIP,10628:down	http://amigo.geneontology.org/cgi-bin/amigo/term_details?term=GO:0071228
negative regulation of transforming growth factor beta3 production	Biological Process	GO:0032913	1	1	1438	17840	0.000695410292072323	5.60538116591928e-05	8.060538e-02	0.6731420	hsa:100133941,CD24,100133941:up	http://amigo.geneontology.org/cgi-bin/amigo/term_details?term=GO:0032913
epithelial cell proliferation involved in prostatic bud elongation	Biological Process	GO:0060517	1	1	1438	17840	0.000695410292072323	5.60538116591928e-05	8.060538e-02	0.6731420	hsa:6662,SOX9,6662:up	http://amigo.geneontology.org/cgi-bin/amigo/term_details?term=GO:0060517
chemokinesis	Biological Process	GO:0042466	1	1	1438	17840	0.000695410292072323	5.60538116591928e-05	8.060538e-02	0.6731420	hsa:5734,PTGER4,5734:up	http://amigo.geneontology.org/cgi-bin/amigo/term_details?term=GO:0042466
positive regulation of protein import into mitochondrial outer membrane	Biological Process	GO:1903638	1	1	1438	17840	0.000695410292072323	5.60538116591928e-05	8.060538e-02	0.6731420	hsa:9141,PDCD5,9141:up	http://amigo.geneontology.org/cgi-bin/amigo/term_details?term=GO:1903638
immunoglobulin secretion involved in immune response	Biological Process	GO:0002380	1	1	1438	17840	0.000695410292072323	5.60538116591928e-05	8.060538e-02	0.6731420	hsa:5452,POU2F2,5452:up	http://amigo.geneontology.org/cgi-bin/amigo/term_details?term=GO:0002380
U6 snRNA 3'-end processing	Biological Process	GO:0034477	1	1	1438	17840	0.000695410292072323	5.60538116591928e-05	8.060538e-02	0.6731420	hsa:79650,USB1,79650:up	http://amigo.geneontology.org/cgi-bin/amigo/term_details?term=GO:0034477
innate vocalization behavior	Biological Process	GO:0098582	1	1	1438	17840	0.000695410292072323	5.60538116591928e-05	8.060538e-02	0.6731420	hsa:26053,AUTS2,26053:up	http://amigo.geneontology.org/cgi-bin/amigo/term_details?term=GO:0098582
positive regulation of Wnt signaling pathway involved in dorsal/ventral axis specification	Biological Process	GO:2000055	1	1	1438	17840	0.000695410292072323	5.60538116591928e-05	8.060538e-02	0.6731420	hsa:4040,LRP6,4040:up	http://amigo.geneontology.org/cgi-bin/amigo/term_details?term=GO:2000055
positive regulation of DNA-templated transcription, termination	Biological Process	GO:0060566	1	1	1438	17840	0.000695410292072323	5.60538116591928e-05	8.060538e-02	0.6731420	hsa:23064,SETX,23064:up	http://amigo.geneontology.org/cgi-bin/amigo/term_details?term=GO:0060566
post-embryonic forelimb morphogenesis	Biological Process	GO:0035128	1	1	1438	17840	0.000695410292072323	5.60538116591928e-05	8.060538e-02	0.6731420	hsa:546,ATRX,546:up	http://amigo.geneontology.org/cgi-bin/amigo/term_details?term=GO:0035128
regulation of actin phosphorylation	Biological Process	GO:0043538	1	1	1438	17840	0.000695410292072323	5.60538116591928e-05	8.060538e-02	0.6731420	hsa:5756,TWF1,5756:up	http://amigo.geneontology.org/cgi-bin/amigo/term_details?term=GO:0043538
planar cell polarity pathway involved in outflow tract morphogenesis	Biological Process	GO:0061347	1	1	1438	17840	0.000695410292072323	5.60538116591928e-05	8.060538e-02	0.6731420	hsa:7474,WNT5A,7474:up	http://amigo.geneontology.org/cgi-bin/amigo/term_details?term=GO:0061347
chemorepulsion of branchiomotor axon	Biological Process	GO:0021793	1	1	1438	17840	0.000695410292072323	5.60538116591928e-05	8.060538e-02	0.6731420	hsa:91584,PLXNA4,91584:down	http://amigo.geneontology.org/cgi-bin/amigo/term_details?term=GO:0021793
negative regulation of branch elongation involved in ureteric bud branching	Biological Process	GO:0072096	1	1	1438	17840	0.000695410292072323	5.60538116591928e-05	8.060538e-02	0.6731420	hsa:652,BMP4,652:down	http://amigo.geneontology.org/cgi-bin/amigo/term_details?term=GO:0072096
response to DDT	Biological Process	GO:0046680	1	1	1438	17840	0.000695410292072323	5.60538116591928e-05	8.060538e-02	0.6731420	hsa:891,CCNB1,891:up	http://amigo.geneontology.org/cgi-bin/amigo/term_details?term=GO:0046680
regulation of cardiac muscle fiber development	Biological Process	GO:0055018	1	1	1438	17840	0.000695410292072323	5.60538116591928e-05	8.060538e-02	0.6731420	hsa:652,BMP4,652:down	http://amigo.geneontology.org/cgi-bin/amigo/term_details?term=GO:0055018
MHC class I protein complex assembly	Biological Process	GO:0002397	1	1	1438	17840	0.000695410292072323	5.60538116591928e-05	8.060538e-02	0.6731420	hsa:811,CALR,811:up	http://amigo.geneontology.org/cgi-bin/amigo/term_details?term=GO:0002397
microtubule cytoskeleton organization involved in homologous chromosome segregation	Biological Process	GO:0090172	1	1	1438	17840	0.000695410292072323	5.60538116591928e-05	8.060538e-02	0.6731420	hsa:675,BRCA2,675:up	http://amigo.geneontology.org/cgi-bin/amigo/term_details?term=GO:0090172
protein transport out of membrane raft	Biological Process	GO:0032599	1	1	1438	17840	0.000695410292072323	5.60538116591928e-05	8.060538e-02	0.6731420	hsa:100133941,CD24,100133941:up	http://amigo.geneontology.org/cgi-bin/amigo/term_details?term=GO:0032599
BMP signaling pathway involved in renal system segmentation	Biological Process	GO:0061151	1	1	1438	17840	0.000695410292072323	5.60538116591928e-05	8.060538e-02	0.6731420	hsa:652,BMP4,652:down	http://amigo.geneontology.org/cgi-bin/amigo/term_details?term=GO:0061151
renal tubular secretion	Biological Process	GO:0097254	1	1	1438	17840	0.000695410292072323	5.60538116591928e-05	8.060538e-02	0.6731420	hsa:9356,SLC22A6,9356:up	http://amigo.geneontology.org/cgi-bin/amigo/term_details?term=GO:0097254
L-arginine transmembrane transport	Biological Process	GO:1903400	1	1	1438	17840	0.000695410292072323	5.60538116591928e-05	8.060538e-02	0.6731420	hsa:6542,SLC7A2,6542:up	http://amigo.geneontology.org/cgi-bin/amigo/term_details?term=GO:1903400
sodium ion import across plasma membrane	Biological Process	GO:0098719	1	1	1438	17840	0.000695410292072323	5.60538116591928e-05	8.060538e-02	0.6731420	hsa:6548,SLC9A1,6548:down	http://amigo.geneontology.org/cgi-bin/amigo/term_details?term=GO:0098719
trochlear nerve morphogenesis	Biological Process	GO:0021639	1	1	1438	17840	0.000695410292072323	5.60538116591928e-05	8.060538e-02	0.6731420	hsa:401,PHOX2A,401:up	http://amigo.geneontology.org/cgi-bin/amigo/term_details?term=GO:0021639
growth plate cartilage axis specification	Biological Process	GO:0003421	1	1	1438	17840	0.000695410292072323	5.60538116591928e-05	8.060538e-02	0.6731420	hsa:6781,STC1,6781:up	http://amigo.geneontology.org/cgi-bin/amigo/term_details?term=GO:0003421
negative regulation of glucose catabolic process to lactate via pyruvate	Biological Process	GO:1904024	1	1	1438	17840	0.000695410292072323	5.60538116591928e-05	8.060538e-02	0.6731420	hsa:57103,TIGAR,57103:up	http://amigo.geneontology.org/cgi-bin/amigo/term_details?term=GO:1904024
regulation of metanephric S-shaped body morphogenesis	Biological Process	GO:2000004	1	1	1438	17840	0.000695410292072323	5.60538116591928e-05	8.060538e-02	0.6731420	hsa:652,BMP4,652:down	http://amigo.geneontology.org/cgi-bin/amigo/term_details?term=GO:2000004
adrenergic receptor signaling pathway involved in positive regulation of heart rate	Biological Process	GO:0086024	1	1	1438	17840	0.000695410292072323	5.60538116591928e-05	8.060538e-02	0.6731420	hsa:5144,PDE4D,5144:down	http://amigo.geneontology.org/cgi-bin/amigo/term_details?term=GO:0086024
planar cell polarity pathway involved in ventricular septum morphogenesis	Biological Process	GO:0061348	1	1	1438	17840	0.000695410292072323	5.60538116591928e-05	8.060538e-02	0.6731420	hsa:7474,WNT5A,7474:up	http://amigo.geneontology.org/cgi-bin/amigo/term_details?term=GO:0061348
termination of RNA polymerase II transcription, poly(A)-coupled	Biological Process	GO:0030846	1	1	1438	17840	0.000695410292072323	5.60538116591928e-05	8.060538e-02	0.6731420	hsa:23064,SETX,23064:up	http://amigo.geneontology.org/cgi-bin/amigo/term_details?term=GO:0030846
pyramidal neuron migration	Biological Process	GO:0021852	1	1	1438	17840	0.000695410292072323	5.60538116591928e-05	8.060538e-02	0.6731420	hsa:27185,DISC1,27185:down	http://amigo.geneontology.org/cgi-bin/amigo/term_details?term=GO:0021852
microtubule-dependent intracellular transport of viral material towards nucleus	Biological Process	GO:0075521	1	1	1438	17840	0.000695410292072323	5.60538116591928e-05	8.060538e-02	0.6731420	hsa:6993,DYNLT1,6993:up	http://amigo.geneontology.org/cgi-bin/amigo/term_details?term=GO:0075521
regulation of mitotic cytokinetic process	Biological Process	GO:1903436	1	1	1438	17840	0.000695410292072323	5.60538116591928e-05	8.060538e-02	0.6731420	hsa:9585,KIF20B,9585:up	http://amigo.geneontology.org/cgi-bin/amigo/term_details?term=GO:1903436
positive regulation of telomeric RNA transcription from RNA pol II promoter	Biological Process	GO:1901582	1	1	1438	17840	0.000695410292072323	5.60538116591928e-05	8.060538e-02	0.6731420	hsa:546,ATRX,546:up	http://amigo.geneontology.org/cgi-bin/amigo/term_details?term=GO:1901582
positive regulation of cardiac muscle fiber development	Biological Process	GO:0055020	1	1	1438	17840	0.000695410292072323	5.60538116591928e-05	8.060538e-02	0.6731420	hsa:652,BMP4,652:down	http://amigo.geneontology.org/cgi-bin/amigo/term_details?term=GO:0055020
regulation of interleukin-2-mediated signaling pathway	Biological Process	GO:1902205	1	1	1438	17840	0.000695410292072323	5.60538116591928e-05	8.060538e-02	0.6731420	hsa:5771,PTPN2,5771:up	http://amigo.geneontology.org/cgi-bin/amigo/term_details?term=GO:1902205
DNA strand elongation involved in cell cycle DNA replication	Biological Process	GO:1902296	1	1	1438	17840	0.000695410292072323	5.60538116591928e-05	8.060538e-02	0.6731420	hsa:9837,GINS1,9837:up	http://amigo.geneontology.org/cgi-bin/amigo/term_details?term=GO:1902296
nucleolar fragmentation	Biological Process	GO:0007576	1	1	1438	17840	0.000695410292072323	5.60538116591928e-05	8.060538e-02	0.6731420	hsa:6940,ZNF354A,6940:up	http://amigo.geneontology.org/cgi-bin/amigo/term_details?term=GO:0007576
regulation of branching involved in salivary gland morphogenesis by extracellular matrix-epithelial cell signaling	Biological Process	GO:0060668	1	1	1438	17840	0.000695410292072323	5.60538116591928e-05	8.060538e-02	0.6731420	hsa:59277,NTN4,59277:up	http://amigo.geneontology.org/cgi-bin/amigo/term_details?term=GO:0060668
DNA strand elongation involved in mitotic DNA replication	Biological Process	GO:1902983	1	1	1438	17840	0.000695410292072323	5.60538116591928e-05	8.060538e-02	0.6731420	hsa:9837,GINS1,9837:up	http://amigo.geneontology.org/cgi-bin/amigo/term_details?term=GO:1902983
trochlear nerve formation	Biological Process	GO:0021642	1	1	1438	17840	0.000695410292072323	5.60538116591928e-05	8.060538e-02	0.6731420	hsa:401,PHOX2A,401:up	http://amigo.geneontology.org/cgi-bin/amigo/term_details?term=GO:0021642
toll-like receptor 1 signaling pathway	Biological Process	GO:0034130	1	1	1438	17840	0.000695410292072323	5.60538116591928e-05	8.060538e-02	0.6731420	hsa:7096,TLR1,7096:up	http://amigo.geneontology.org/cgi-bin/amigo/term_details?term=GO:0034130
endocardial cell fate commitment	Biological Process	GO:0060957	1	1	1438	17840	0.000695410292072323	5.60538116591928e-05	8.060538e-02	0.6731420	hsa:90,ACVR1,90:up	http://amigo.geneontology.org/cgi-bin/amigo/term_details?term=GO:0060957
L-arginine import across plasma membrane	Biological Process	GO:0097638	1	1	1438	17840	0.000695410292072323	5.60538116591928e-05	8.060538e-02	0.6731420	hsa:6542,SLC7A2,6542:up	http://amigo.geneontology.org/cgi-bin/amigo/term_details?term=GO:0097638
negative regulation of interleukin-1 alpha production	Biological Process	GO:0032690	1	1	1438	17840	0.000695410292072323	5.60538116591928e-05	8.060538e-02	0.6731420	hsa:5734,PTGER4,5734:up	http://amigo.geneontology.org/cgi-bin/amigo/term_details?term=GO:0032690
positive regulation of phosphatidylcholine biosynthetic process	Biological Process	GO:2001247	1	1	1438	17840	0.000695410292072323	5.60538116591928e-05	8.060538e-02	0.6731420	hsa:2181,ACSL3,2181:up	http://amigo.geneontology.org/cgi-bin/amigo/term_details?term=GO:2001247
regulation of cardiac muscle cell contraction	Biological Process	GO:0086004	7	47	1438	17840	0.00486787204450626	0.00263452914798206	8.085102e-02	0.6731420	hsa:5144,PDE4D,5144:down|hsa:3728,JUP,3728:down|hsa:1824,DSC2,1824:up|hsa:3757,KCNH2,3757:up|hsa:3759,KCNJ2,3759:down|hsa:6781,STC1,6781:up|hsa:1829,DSG2,1829:up	http://amigo.geneontology.org/cgi-bin/amigo/term_details?term=GO:0086004
protein insertion into membrane	Biological Process	GO:0051205	7	47	1438	17840	0.00486787204450626	0.00263452914798206	8.085102e-02	0.6731420	hsa:6557,SLC12A1,6557:down|hsa:64108,RTP4,64108:up|hsa:10018,BCL2L11,10018:up|hsa:841,CASP8,841:up|hsa:5366,PMAIP1,5366:up|hsa:637,BID,637:up|hsa:65055,REEP1,65055:up	http://amigo.geneontology.org/cgi-bin/amigo/term_details?term=GO:0051205
neuron migration	Biological Process	GO:0001764	16	136	1438	17840	0.0111265646731572	0.00762331838565022	8.092025e-02	0.6731420	hsa:27185,DISC1,27185:down|hsa:259266,ASPM,259266:up|hsa:7976,FZD3,7976:up|hsa:23768,FLRT2,23768:up|hsa:7155,TOP2B,7155:up|hsa:9585,KIF20B,9585:up|hsa:161582,DYX1C1,161582:up|hsa:57556,SEMA6A,57556:up|hsa:7852,CXCR4,7852:up|hsa:4147,MATN2,4147:down|hsa:10806,SDCCAG8,10806:up|hsa:5194,PEX13,5194:up|hsa:3320,HSP90AA1,3320:up|hsa:84623,KIRREL3,84623:up|hsa:4137,MAPT,4137:down|hsa:23284,ADGRL3,23284:…	http://amigo.geneontology.org/cgi-bin/amigo/term_details?term=GO:0001764
cellular water homeostasis	Biological Process	GO:0009992	3	13	1438	17840	0.00208623087621697	0.000728699551569507	8.125542e-02	0.6731420	hsa:89872,AQP10,89872:up|hsa:6539,SLC6A12,6539:up|hsa:366,AQP9,366:down	http://amigo.geneontology.org/cgi-bin/amigo/term_details?term=GO:0009992
meiotic chromosome separation	Biological Process	GO:0051307	3	13	1438	17840	0.00208623087621697	0.000728699551569507	8.125542e-02	0.6731420	hsa:7153,TOP2A,7153:up|hsa:7155,TOP2B,7155:up|hsa:378708,APITD1,378708:up	http://amigo.geneontology.org/cgi-bin/amigo/term_details?term=GO:0051307
activation of cysteine-type endopeptidase activity involved in apoptotic signaling pathway	Biological Process	GO:0097296	3	13	1438	17840	0.00208623087621697	0.000728699551569507	8.125542e-02	0.6731420	hsa:8743,TNFSF10,8743:up|hsa:3717,JAK2,3717:up|hsa:841,CASP8,841:up	http://amigo.geneontology.org/cgi-bin/amigo/term_details?term=GO:0097296
negative regulation of systemic arterial blood pressure	Biological Process	GO:0003085	3	13	1438	17840	0.00208623087621697	0.000728699551569507	8.125542e-02	0.6731420	hsa:154,ADRB2,154:down|hsa:659,BMPR2,659:up|hsa:4878,NPPA,4878:up	http://amigo.geneontology.org/cgi-bin/amigo/term_details?term=GO:0003085
planar cell polarity pathway involved in neural tube closure	Biological Process	GO:0090179	3	13	1438	17840	0.00208623087621697	0.000728699551569507	8.125542e-02	0.6731420	hsa:2535,FZD2,2535:up|hsa:57216,VANGL2,57216:up|hsa:7474,WNT5A,7474:up	http://amigo.geneontology.org/cgi-bin/amigo/term_details?term=GO:0090179
glial cell fate commitment	Biological Process	GO:0021781	3	13	1438	17840	0.00208623087621697	0.000728699551569507	8.125542e-02	0.6731420	hsa:388585,HES5,388585:down|hsa:55553,SOX6,55553:down|hsa:6662,SOX9,6662:up	http://amigo.geneontology.org/cgi-bin/amigo/term_details?term=GO:0021781
establishment of monopolar cell polarity	Biological Process	GO:0061162	3	13	1438	17840	0.00208623087621697	0.000728699551569507	8.125542e-02	0.6731420	hsa:6624,FSCN1,6624:up|hsa:5584,PRKCI,5584:up|hsa:7474,WNT5A,7474:up	http://amigo.geneontology.org/cgi-bin/amigo/term_details?term=GO:0061162
carnitine metabolic process	Biological Process	GO:0009437	3	13	1438	17840	0.00208623087621697	0.000728699551569507	8.125542e-02	0.6731420	hsa:33,ACADL,33:down|hsa:55217,TMLHE,55217:up|hsa:6584,SLC22A5,6584:up	http://amigo.geneontology.org/cgi-bin/amigo/term_details?term=GO:0009437
regulation of podosome assembly	Biological Process	GO:0071801	3	13	1438	17840	0.00208623087621697	0.000728699551569507	8.125542e-02	0.6731420	hsa:6624,FSCN1,6624:up|hsa:3567,IL5,3567:down|hsa:7984,ARHGEF5,7984:down	http://amigo.geneontology.org/cgi-bin/amigo/term_details?term=GO:0071801
regulation of gluconeogenesis	Biological Process	GO:0006111	6	38	1438	17840	0.00417246175243394	0.00213004484304933	8.154774e-02	0.6732986	hsa:5771,PTPN2,5771:up|hsa:57001,SDHAF3,57001:up|hsa:114899,C1QTNF3,114899:down|hsa:10776,ARPP19,10776:up|hsa:145264,SERPINA12,145264:down|hsa:9572,NR1D1,9572:down	http://amigo.geneontology.org/cgi-bin/amigo/term_details?term=GO:0006111
male meiosis	Biological Process	GO:0007140	6	38	1438	17840	0.00417246175243394	0.00213004484304933	8.154774e-02	0.6732986	hsa:136991,ASZ1,136991:down|hsa:54456,MOV10L1,54456:up|hsa:675,BRCA2,675:up|hsa:676,BRDT,676:down|hsa:2175,FANCA,2175:up|hsa:3306,HSPA2,3306:down	http://amigo.geneontology.org/cgi-bin/amigo/term_details?term=GO:0007140
protein N-linked glycosylation via asparagine	Biological Process	GO:0018279	6	38	1438	17840	0.00417246175243394	0.00213004484304933	8.154774e-02	0.6732986	hsa:4247,MGAT2,4247:up|hsa:6483,ST3GAL2,6483:up|hsa:58505,OSTC,58505:up|hsa:3998,LMAN1,3998:up|hsa:8869,ST3GAL5,8869:up|hsa:30815,ST6GALNAC6,30815:up	http://amigo.geneontology.org/cgi-bin/amigo/term_details?term=GO:0018279
regulation of peptide transport	Biological Process	GO:0090087	27	253	1438	17840	0.0187760778859527	0.0141816143497758	8.169552e-02	0.6739538	hsa:26585,GREM1,26585:down|hsa:114899,C1QTNF3,114899:down|hsa:222546,RFX6,222546:down|hsa:23409,SIRT4,23409:up|hsa:11069,RAPGEF4,11069:down|hsa:5734,PTGER4,5734:up|hsa:7447,VSNL1,7447:up|hsa:9516,LITAF,9516:up|hsa:2266,FGG,2266:down|hsa:5532,PPP3CB,5532:up|hsa:116,ADCYAP1,116:up|hsa:18,ABAT,18:up|hsa:4925,NUCB2,4925:up|hsa:9378,NRXN1,9378:down|hsa:5213,PFKM,5213:up|hsa:252983,STXBP4,252983:up|hsa…	http://amigo.geneontology.org/cgi-bin/amigo/term_details?term=GO:0090087
cofactor metabolic process	Biological Process	GO:0051186	37	363	1438	17840	0.0257301808066759	0.020347533632287	8.252777e-02	0.6796810	hsa:349565,NMNAT3,349565:down|hsa:10058,ABCB6,10058:up|hsa:10157,AASS,10157:up|hsa:5166,PDK4,5166:down|hsa:8884,SLC5A6,8884:up|hsa:284486,THEM5,284486:down|hsa:4338,MOCS2,4338:up|hsa:83594,NUDT12,83594:up|hsa:57026,PDXP,57026:up|hsa:60496,AASDHPPT,60496:up|hsa:729020,RPEL1,729020:up|hsa:57103,TIGAR,57103:up|hsa:57834,CYP4F11,57834:up|hsa:230,ALDOC,230:down|hsa:26027,ACOT11,26027:up|hsa:3479,IGF1,…	http://amigo.geneontology.org/cgi-bin/amigo/term_details?term=GO:0051186
positive regulation of nucleic acid-templated transcription	Biological Process	GO:1903508	128	1412	1438	17840	0.0890125173852573	0.0791479820627803	8.322884e-02	0.6807226	hsa:892,CCNC,892:up|hsa:90,ACVR1,90:up|hsa:546,ATRX,546:up|hsa:1950,EGF,1950:up|hsa:10974,ADIRF,10974:down|hsa:4869,NPM1,4869:up|hsa:65056,GPBP1,65056:up|hsa:6596,HLTF,6596:up|hsa:2535,FZD2,2535:up|hsa:1390,CREM,1390:up|hsa:26053,AUTS2,26053:up|hsa:84662,GLIS2,84662:up|hsa:3479,IGF1,3479:down|hsa:7984,ARHGEF5,7984:down|hsa:7707,ZNF148,7707:up|hsa:2115,ETV1,2115:up|hsa:163081,ZNF567,163081:up|hsa:…	http://amigo.geneontology.org/cgi-bin/amigo/term_details?term=GO:1903508
positive regulation of transcription, DNA-templated	Biological Process	GO:0045893	128	1412	1438	17840	0.0890125173852573	0.0791479820627803	8.322884e-02	0.6807226	hsa:892,CCNC,892:up|hsa:90,ACVR1,90:up|hsa:546,ATRX,546:up|hsa:1950,EGF,1950:up|hsa:10974,ADIRF,10974:down|hsa:4869,NPM1,4869:up|hsa:65056,GPBP1,65056:up|hsa:6596,HLTF,6596:up|hsa:2535,FZD2,2535:up|hsa:1390,CREM,1390:up|hsa:26053,AUTS2,26053:up|hsa:84662,GLIS2,84662:up|hsa:3479,IGF1,3479:down|hsa:7984,ARHGEF5,7984:down|hsa:7707,ZNF148,7707:up|hsa:2115,ETV1,2115:up|hsa:163081,ZNF567,163081:up|hsa:…	http://amigo.geneontology.org/cgi-bin/amigo/term_details?term=GO:0045893
DNA metabolic process	Biological Process	GO:0006259	87	933	1438	17840	0.0605006954102921	0.0522982062780269	8.347596e-02	0.6807226	hsa:9134,CCNE2,9134:up|hsa:56647,BCCIP,56647:up|hsa:54737,MPHOSPH8,54737:up|hsa:546,ATRX,546:up|hsa:1602,DACH1,1602:up|hsa:1950,EGF,1950:up|hsa:157570,ESCO2,157570:up|hsa:4869,NPM1,4869:up|hsa:6596,HLTF,6596:up|hsa:84690,SPATA22,84690:down|hsa:254394,MCM9,254394:down|hsa:22948,CCT5,22948:up|hsa:23198,PSME4,23198:up|hsa:3479,IGF1,3479:down|hsa:259282,BOD1L1,259282:up|hsa:3776,KCNK2,3776:up|hsa:552…	http://amigo.geneontology.org/cgi-bin/amigo/term_details?term=GO:0006259
regulation of interferon-gamma-mediated signaling pathway	Biological Process	GO:0060334	4	21	1438	17840	0.00278164116828929	0.00117713004484305	8.362176e-02	0.6807226	hsa:5771,PTPN2,5771:up|hsa:3717,JAK2,3717:up|hsa:8651,SOCS1,8651:up|hsa:9093,DNAJA3,9093:up	http://amigo.geneontology.org/cgi-bin/amigo/term_details?term=GO:0060334
left/right pattern formation	Biological Process	GO:0060972	4	21	1438	17840	0.00278164116828929	0.00117713004484305	8.362176e-02	0.6807226	hsa:57669,EPB41L5,57669:up|hsa:26160,IFT172,26160:up|hsa:55329,MNS1,55329:up|hsa:200894,ARL13B,200894:up	http://amigo.geneontology.org/cgi-bin/amigo/term_details?term=GO:0060972
positive regulation of neuroblast proliferation	Biological Process	GO:0002052	4	21	1438	17840	0.00278164116828929	0.00117713004484305	8.362176e-02	0.6807226	hsa:27185,DISC1,27185:down|hsa:3091,HIF1A,3091:up|hsa:259266,ASPM,259266:up|hsa:7976,FZD3,7976:up	http://amigo.geneontology.org/cgi-bin/amigo/term_details?term=GO:0002052
central nervous system projection neuron axonogenesis	Biological Process	GO:0021952	4	21	1438	17840	0.00278164116828929	0.00117713004484305	8.362176e-02	0.6807226	hsa:91584,PLXNA4,91584:down|hsa:2047,EPHB1,2047:down|hsa:1009,CDH11,1009:up|hsa:25987,TSKU,25987:up	http://amigo.geneontology.org/cgi-bin/amigo/term_details?term=GO:0021952
phosphate ion transport	Biological Process	GO:0006817	4	21	1438	17840	0.00278164116828929	0.00117713004484305	8.362176e-02	0.6807226	hsa:1408,CRY2,1408:down|hsa:54020,SLC37A1,54020:down|hsa:10246,SLC17A2,10246:down|hsa:11095,ADAMTS8,11095:up	http://amigo.geneontology.org/cgi-bin/amigo/term_details?term=GO:0006817
regulation of protein import into nucleus, translocation	Biological Process	GO:0033158	4	21	1438	17840	0.00278164116828929	0.00117713004484305	8.362176e-02	0.6807226	hsa:3717,JAK2,3717:up|hsa:672,BRCA1,672:up|hsa:3320,HSP90AA1,3320:up|hsa:3479,IGF1,3479:down	http://amigo.geneontology.org/cgi-bin/amigo/term_details?term=GO:0033158
negative regulation of translational initiation	Biological Process	GO:0045947	4	21	1438	17840	0.00278164116828929	0.00117713004484305	8.362176e-02	0.6807226	hsa:3646,EIF3E,3646:up|hsa:7175,TPR,7175:up|hsa:400961,PAIP2B,400961:down|hsa:9451,EIF2AK3,9451:up	http://amigo.geneontology.org/cgi-bin/amigo/term_details?term=GO:0045947
protein mannosylation	Biological Process	GO:0035268	4	21	1438	17840	0.00278164116828929	0.00117713004484305	8.362176e-02	0.6807226	hsa:23333,DPY19L1,23333:up|hsa:10329,TMEM5,10329:up|hsa:286148,DPY19L4,286148:up|hsa:147991,DPY19L3,147991:up	http://amigo.geneontology.org/cgi-bin/amigo/term_details?term=GO:0035268
macromolecule biosynthetic process	Biological Process	GO:0009059	418	4901	1438	17840	0.290681502086231	0.274719730941704	8.379434e-02	0.6815642	hsa:23390,ZDHHC17,23390:up|hsa:90,ACVR1,90:up|hsa:57505,AARS2,57505:up|hsa:1950,EGF,1950:up|hsa:4869,NPM1,4869:up|hsa:65056,GPBP1,65056:up|hsa:6596,HLTF,6596:up|hsa:170622,COMMD6,170622:up|hsa:51312,SLC25A37,51312:up|hsa:26053,AUTS2,26053:up|hsa:56924,PAK6,56924:down|hsa:440400,RNASEK,440400:up|hsa:7752,ZNF200,7752:up|hsa:3479,IGF1,3479:down|hsa:7707,ZNF148,7707:up|hsa:1408,CRY2,1408:down|hsa:925…	http://amigo.geneontology.org/cgi-bin/amigo/term_details?term=GO:0009059
platelet degranulation	Biological Process	GO:0002576	13	106	1438	17840	0.0090403337969402	0.00594170403587444	8.406107e-02	0.6831696	hsa:5265,SERPINA1,5265:up|hsa:7094,TLN1,7094:up|hsa:1950,EGF,1950:up|hsa:3479,IGF1,3479:down|hsa:2277,FIGF,2277:up|hsa:87,ACTN1,87:up|hsa:5054,SERPINE1,5054:up|hsa:2266,FGG,2266:down|hsa:2244,FGB,2244:down|hsa:51706,CYB5R1,51706:down|hsa:29106,SCG3,29106:down|hsa:3959,LGALS3BP,3959:up|hsa:7277,TUBA4A,7277:down	http://amigo.geneontology.org/cgi-bin/amigo/term_details?term=GO:0002576
cell junction organization	Biological Process	GO:0034330	26	243	1438	17840	0.0180806675938804	0.0136210762331839	8.423252e-02	0.6839986	hsa:81607,NECTIN4,81607:down|hsa:57669,EPB41L5,57669:up|hsa:7122,CLDN5,7122:down|hsa:57662,CAMSAP3,57662:down|hsa:26585,GREM1,26585:down|hsa:3728,JUP,3728:down|hsa:5817,PVR,5817:up|hsa:7094,TLN1,7094:up|hsa:2706,GJB2,2706:up|hsa:83605,CCM2,83605:up|hsa:87,ACTN1,87:up|hsa:1009,CDH11,1009:up|hsa:5586,PKN2,5586:up|hsa:5795,PTPRJ,5795:up|hsa:283,ANG,283:down|hsa:6624,FSCN1,6624:up|hsa:143098,MPP7,143…	http://amigo.geneontology.org/cgi-bin/amigo/term_details?term=GO:0034330
regulation of carbohydrate biosynthetic process	Biological Process	GO:0043255	11	86	1438	17840	0.00764951321279555	0.00482062780269058	8.437052e-02	0.6845549	hsa:5771,PTPN2,5771:up|hsa:57001,SDHAF3,57001:up|hsa:9852,EPM2AIP1,9852:up|hsa:114899,C1QTNF3,114899:down|hsa:145264,SERPINA12,145264:down|hsa:4142,MAS1,4142:down|hsa:1950,EGF,1950:up|hsa:5734,PTGER4,5734:up|hsa:3479,IGF1,3479:down|hsa:10776,ARPP19,10776:up|hsa:9572,NR1D1,9572:down	http://amigo.geneontology.org/cgi-bin/amigo/term_details?term=GO:0043255
regulation of hormone secretion	Biological Process	GO:0046883	27	254	1438	17840	0.0187760778859527	0.014237668161435	8.472643e-02	0.6863119	hsa:114899,C1QTNF3,114899:down|hsa:222546,RFX6,222546:down|hsa:23409,SIRT4,23409:up|hsa:11069,RAPGEF4,11069:down|hsa:5734,PTGER4,5734:up|hsa:7447,VSNL1,7447:up|hsa:2266,FGG,2266:down|hsa:5532,PPP3CB,5532:up|hsa:116,ADCYAP1,116:up|hsa:18,ABAT,18:up|hsa:4925,NUCB2,4925:up|hsa:9378,NRXN1,9378:down|hsa:5213,PFKM,5213:up|hsa:252983,STXBP4,252983:up|hsa:2822,GPLD1,2822:down|hsa:3745,KCNB1,3745:down|hsa…	http://amigo.geneontology.org/cgi-bin/amigo/term_details?term=GO:0046883
response to mechanical stimulus	Biological Process	GO:0009612	23	211	1438	17840	0.0159944367176634	0.0118273542600897	8.529718e-02	0.6903674	hsa:3728,JUP,3728:down|hsa:3759,KCNJ2,3759:down|hsa:1508,CTSB,1508:up|hsa:4878,NPPA,4878:up|hsa:6662,SOX9,6662:up|hsa:5734,PTGER4,5734:up|hsa:891,CCNB1,891:up|hsa:9378,NRXN1,9378:down|hsa:200539,ANKRD23,200539:up|hsa:1535,CYBA,1535:up|hsa:3091,HIF1A,3091:up|hsa:10628,TXNIP,10628:down|hsa:835,CASP2,835:up|hsa:3479,IGF1,3479:down|hsa:6548,SLC9A1,6548:down|hsa:3776,KCNK2,3776:up|hsa:64220,STRA6,6422…	http://amigo.geneontology.org/cgi-bin/amigo/term_details?term=GO:0009612
positive regulation of tumor necrosis factor superfamily cytokine production	Biological Process	GO:1903557	8	57	1438	17840	0.00556328233657858	0.00319506726457399	8.542851e-02	0.6908627	hsa:7097,TLR2,7097:up|hsa:1535,CYBA,1535:up|hsa:64170,CARD9,64170:up|hsa:148022,TICAM1,148022:down|hsa:3717,JAK2,3717:up|hsa:23643,LY96,23643:up|hsa:7096,TLR1,7096:up|hsa:3066,HDAC2,3066:up	http://amigo.geneontology.org/cgi-bin/amigo/term_details?term=GO:1903557
reproductive system development	Biological Process	GO:0061458	42	420	1438	17840	0.0292072322670376	0.023542600896861	8.571732e-02	0.6926297	hsa:659,BMPR2,659:up|hsa:546,ATRX,546:up|hsa:1508,CTSB,1508:up|hsa:4142,MAS1,4142:down|hsa:638,BIK,638:up|hsa:6662,SOX9,6662:up|hsa:116,ADCYAP1,116:up|hsa:84690,SPATA22,84690:down|hsa:7474,WNT5A,7474:up|hsa:3206,HOXA10,3206:down|hsa:7482,WNT2B,7482:down|hsa:3696,ITGB8,3696:up|hsa:283,ANG,283:down|hsa:1046,CDX4,1046:down|hsa:6788,STK3,6788:up|hsa:835,CASP2,835:up|hsa:4040,LRP6,4040:up|hsa:10018,BC…	http://amigo.geneontology.org/cgi-bin/amigo/term_details?term=GO:0061458
organelle organization	Biological Process	GO:0006996	308	3569	1438	17840	0.214186369958275	0.200056053811659	8.725645e-02	0.7027605	hsa:6712,SPTBN2,6712:down|hsa:11116,FGFR1OP,11116:up|hsa:1410,CRYAB,1410:down|hsa:57505,AARS2,57505:up|hsa:1950,EGF,1950:up|hsa:25802,LMOD1,25802:down|hsa:26160,IFT172,26160:up|hsa:4869,NPM1,4869:up|hsa:90167,FRMD7,90167:down|hsa:6596,HLTF,6596:up|hsa:891,CCNB1,891:up|hsa:359845,FAM101B,359845:up|hsa:26053,AUTS2,26053:up|hsa:56924,PAK6,56924:down|hsa:9796,PHYHIP,9796:down|hsa:23607,CD2AP,23607:up…	http://amigo.geneontology.org/cgi-bin/amigo/term_details?term=GO:0006996
regulation of RNA metabolic process	Biological Process	GO:0051252	308	3569	1438	17840	0.214186369958275	0.200056053811659	8.725645e-02	0.7027605	hsa:90,ACVR1,90:up|hsa:1950,EGF,1950:up|hsa:4869,NPM1,4869:up|hsa:65056,GPBP1,65056:up|hsa:6596,HLTF,6596:up|hsa:891,CCNB1,891:up|hsa:170622,COMMD6,170622:up|hsa:26053,AUTS2,26053:up|hsa:56924,PAK6,56924:down|hsa:7752,ZNF200,7752:up|hsa:3479,IGF1,3479:down|hsa:7707,ZNF148,7707:up|hsa:1408,CRY2,1408:down|hsa:92552,ATXN3L,92552:down|hsa:1786,DNMT1,1786:up|hsa:27332,ZNF638,27332:up|hsa:6787,NEK4,678…	http://amigo.geneontology.org/cgi-bin/amigo/term_details?term=GO:0051252
regulation of stress fiber assembly	Biological Process	GO:0051492	9	67	1438	17840	0.0062586926286509	0.00375560538116592	8.810718e-02	0.7084536	hsa:5734,PTGER4,5734:up|hsa:7984,ARHGEF5,7984:down|hsa:6548,SLC9A1,6548:down|hsa:90167,FRMD7,90167:down|hsa:6093,ROCK1,6093:up|hsa:7168,TPM1,7168:up|hsa:154796,AMOT,154796:down|hsa:11346,SYNPO,11346:up|hsa:9475,ROCK2,9475:up	http://amigo.geneontology.org/cgi-bin/amigo/term_details?term=GO:0051492
response to antibiotic	Biological Process	GO:0046677	7	48	1438	17840	0.00486787204450626	0.00269058295964126	8.840955e-02	0.7085712	hsa:6548,SLC9A1,6548:down|hsa:3717,JAK2,3717:up|hsa:3320,HSP90AA1,3320:up|hsa:841,CASP8,841:up|hsa:255189,PLA2G4F,255189:down|hsa:51319,RSRC1,51319:up|hsa:1396,CRIP1,1396:down	http://amigo.geneontology.org/cgi-bin/amigo/term_details?term=GO:0046677
negative regulation of actin filament polymerization	Biological Process	GO:0030837	7	48	1438	17840	0.00486787204450626	0.00269058295964126	8.840955e-02	0.7085712	hsa:5756,TWF1,5756:up|hsa:29765,TMOD4,29765:up|hsa:6712,SPTBN2,6712:down|hsa:10677,AVIL,10677:up|hsa:830,CAPZA2,830:up|hsa:25802,LMOD1,25802:down|hsa:85477,SCIN,85477:down	http://amigo.geneontology.org/cgi-bin/amigo/term_details?term=GO:0030837
primary alcohol metabolic process	Biological Process	GO:0034308	7	48	1438	17840	0.00486787204450626	0.00269058295964126	8.840955e-02	0.7085712	hsa:130,ADH6,130:down|hsa:195814,SDR16C5,195814:down|hsa:151056,PLB1,151056:up|hsa:10170,DHRS9,10170:up|hsa:9227,LRAT,9227:up|hsa:220,ALDH1A3,220:up|hsa:3479,IGF1,3479:down	http://amigo.geneontology.org/cgi-bin/amigo/term_details?term=GO:0034308
chaperone-mediated protein folding	Biological Process	GO:0061077	7	48	1438	17840	0.00486787204450626	0.00269058295964126	8.840955e-02	0.7085712	hsa:811,CALR,811:up|hsa:10576,CCT2,10576:up|hsa:10808,HSPH1,10808:up|hsa:9141,PDCD5,9141:up|hsa:2287,FKBP3,2287:up|hsa:51303,FKBP11,51303:up|hsa:9601,PDIA4,9601:up	http://amigo.geneontology.org/cgi-bin/amigo/term_details?term=GO:0061077
centriole assembly	Biological Process	GO:0098534	5	30	1438	17840	0.00347705146036161	0.00168161434977578	8.940238e-02	0.7116498	hsa:22995,CEP152,22995:up|hsa:4869,NPM1,4869:up|hsa:672,BRCA1,672:up|hsa:9738,CCP110,9738:up|hsa:163786,SASS6,163786:up	http://amigo.geneontology.org/cgi-bin/amigo/term_details?term=GO:0098534
chromosome condensation	Biological Process	GO:0030261	5	30	1438	17840	0.00347705146036161	0.00168161434977578	8.940238e-02	0.7116498	hsa:7153,TOP2A,7153:up|hsa:10592,SMC2,10592:up|hsa:891,CCNB1,891:up|hsa:113130,CDCA5,113130:up|hsa:10051,SMC4,10051:up	http://amigo.geneontology.org/cgi-bin/amigo/term_details?term=GO:0030261
negative regulation of muscle cell apoptotic process	Biological Process	GO:0010656	5	30	1438	17840	0.00347705146036161	0.00168161434977578	8.940238e-02	0.7116498	hsa:4040,LRP6,4040:up|hsa:3717,JAK2,3717:up|hsa:116,ADCYAP1,116:up|hsa:23409,SIRT4,23409:up|hsa:3479,IGF1,3479:down	http://amigo.geneontology.org/cgi-bin/amigo/term_details?term=GO:0010656
positive regulation of membrane potential	Biological Process	GO:0045838	5	30	1438	17840	0.00347705146036161	0.00168161434977578	8.940238e-02	0.7116498	hsa:112755,STX1B,112755:up|hsa:9378,NRXN1,9378:down|hsa:6804,STX1A,6804:up|hsa:23316,CUX2,23316:up|hsa:9699,RIMS2,9699:up	http://amigo.geneontology.org/cgi-bin/amigo/term_details?term=GO:0045838
retinol metabolic process	Biological Process	GO:0042572	5	30	1438	17840	0.00347705146036161	0.00168161434977578	8.940238e-02	0.7116498	hsa:195814,SDR16C5,195814:down|hsa:151056,PLB1,151056:up|hsa:10170,DHRS9,10170:up|hsa:9227,LRAT,9227:up|hsa:220,ALDH1A3,220:up	http://amigo.geneontology.org/cgi-bin/amigo/term_details?term=GO:0042572
regulation of endoplasmic reticulum stress-induced intrinsic apoptotic signaling pathway	Biological Process	GO:1902235	5	30	1438	17840	0.00347705146036161	0.00168161434977578	8.940238e-02	0.7116498	hsa:10525,HYOU1,10525:up|hsa:5771,PTPN2,5771:up|hsa:10018,BCL2L11,10018:up|hsa:5366,PMAIP1,5366:up|hsa:9451,EIF2AK3,9451:up	http://amigo.geneontology.org/cgi-bin/amigo/term_details?term=GO:1902235
digestive tract development	Biological Process	GO:0048565	16	138	1438	17840	0.0111265646731572	0.00773542600896861	8.944390e-02	0.7116498	hsa:2054,STX2,2054:up|hsa:57669,EPB41L5,57669:up|hsa:26160,IFT172,26160:up|hsa:91461,PKDCC,91461:down|hsa:891,CCNB1,891:up|hsa:57216,VANGL2,57216:up|hsa:7474,WNT5A,7474:up|hsa:57103,TIGAR,57103:up|hsa:3091,HIF1A,3091:up|hsa:3202,HOXA5,3202:down|hsa:64220,STRA6,64220:up|hsa:688,KLF5,688:down|hsa:652,BMP4,652:down|hsa:2304,FOXE1,2304:up|hsa:23242,COBL,23242:down|hsa:2735,GLI1,2735:up	http://amigo.geneontology.org/cgi-bin/amigo/term_details?term=GO:0048565
leukocyte apoptotic process	Biological Process	GO:0071887	12	97	1438	17840	0.00834492350486787	0.0054372197309417	8.969942e-02	0.7131068	hsa:5133,PDCD1,5133:up|hsa:6950,TCP1,6950:up|hsa:57864,SLC46A2,57864:down|hsa:3958,LGALS3,3958:down|hsa:3091,HIF1A,3091:up|hsa:9093,DNAJA3,9093:up|hsa:27242,TNFRSF21,27242:up|hsa:3559,IL2RA,3559:up|hsa:652,BMP4,652:down|hsa:10018,BCL2L11,10018:up|hsa:1029,CDKN2A,1029:up|hsa:7474,WNT5A,7474:up	http://amigo.geneontology.org/cgi-bin/amigo/term_details?term=GO:0071887
peptidyl-asparagine modification	Biological Process	GO:0018196	6	39	1438	17840	0.00417246175243394	0.00218609865470852	9.013646e-02	0.7160033	hsa:4247,MGAT2,4247:up|hsa:6483,ST3GAL2,6483:up|hsa:58505,OSTC,58505:up|hsa:3998,LMAN1,3998:up|hsa:8869,ST3GAL5,8869:up|hsa:30815,ST6GALNAC6,30815:up	http://amigo.geneontology.org/cgi-bin/amigo/term_details?term=GO:0018196
positive regulation of RNA biosynthetic process	Biological Process	GO:1902680	129	1430	1438	17840	0.0897079276773296	0.0801569506726457	9.148296e-02	0.7261137	hsa:892,CCNC,892:up|hsa:90,ACVR1,90:up|hsa:546,ATRX,546:up|hsa:1950,EGF,1950:up|hsa:10974,ADIRF,10974:down|hsa:4869,NPM1,4869:up|hsa:65056,GPBP1,65056:up|hsa:6596,HLTF,6596:up|hsa:2535,FZD2,2535:up|hsa:1390,CREM,1390:up|hsa:26053,AUTS2,26053:up|hsa:84662,GLIS2,84662:up|hsa:3479,IGF1,3479:down|hsa:7984,ARHGEF5,7984:down|hsa:7707,ZNF148,7707:up|hsa:2115,ETV1,2115:up|hsa:163081,ZNF567,163081:up|hsa:…	http://amigo.geneontology.org/cgi-bin/amigo/term_details?term=GO:1902680
positive regulation of secretion	Biological Process	GO:0051047	37	367	1438	17840	0.0257301808066759	0.0205717488789238	9.295761e-02	0.7292725	hsa:23086,EXPH5,23086:down|hsa:26253,CLEC4E,26253:down|hsa:114899,C1QTNF3,114899:down|hsa:2266,FGG,2266:down|hsa:5532,PPP3CB,5532:up|hsa:116,ADCYAP1,116:up|hsa:18,ABAT,18:up|hsa:4925,NUCB2,4925:up|hsa:112755,STX1B,112755:up|hsa:151056,PLB1,151056:up|hsa:338322,NLRP10,338322:down|hsa:24145,PANX1,24145:up|hsa:7474,WNT5A,7474:up|hsa:85477,SCIN,85477:down|hsa:55540,IL17RB,55540:up|hsa:283,ANG,283:dow…	http://amigo.geneontology.org/cgi-bin/amigo/term_details?term=GO:0051047
heterocycle metabolic process	Biological Process	GO:0046483	480	5671	1438	17840	0.333796940194715	0.317881165919283	9.340903e-02	0.7292725	hsa:56606,SLC2A9,56606:up|hsa:90,ACVR1,90:up|hsa:57505,AARS2,57505:up|hsa:1950,EGF,1950:up|hsa:4869,NPM1,4869:up|hsa:65056,GPBP1,65056:up|hsa:6596,HLTF,6596:up|hsa:891,CCNB1,891:up|hsa:4338,MOCS2,4338:up|hsa:170622,COMMD6,170622:up|hsa:26053,AUTS2,26053:up|hsa:56924,PAK6,56924:down|hsa:440400,RNASEK,440400:up|hsa:7752,ZNF200,7752:up|hsa:3479,IGF1,3479:down|hsa:7707,ZNF148,7707:up|hsa:1408,CRY2,14…	http://amigo.geneontology.org/cgi-bin/amigo/term_details?term=GO:0046483
system development	Biological Process	GO:0048731	357	4171	1438	17840	0.248261474269819	0.233800448430493	9.419873e-02	0.7292725	hsa:6712,SPTBN2,6712:down|hsa:90,ACVR1,90:up|hsa:1410,CRYAB,1410:down|hsa:27242,TNFRSF21,27242:up|hsa:1950,EGF,1950:up|hsa:26160,IFT172,26160:up|hsa:6247,RS1,6247:down|hsa:353139,LCE2A,353139:down|hsa:90167,FRMD7,90167:down|hsa:891,CCNB1,891:up|hsa:56243,SKT,56243:up|hsa:359845,FAM101B,359845:up|hsa:55326,AGPAT5,55326:up|hsa:5911,RAP2A,5911:up|hsa:220,ALDH1A3,220:up|hsa:3479,IGF1,3479:down|hsa:77…	http://amigo.geneontology.org/cgi-bin/amigo/term_details?term=GO:0048731
single-organism organelle organization	Biological Process	GO:1902589	227	2600	1438	17840	0.157858136300417	0.145739910313901	9.444157e-02	0.7292725	hsa:6712,SPTBN2,6712:down|hsa:11116,FGFR1OP,11116:up|hsa:8936,WASF1,8936:up|hsa:1410,CRYAB,1410:down|hsa:546,ATRX,546:up|hsa:57545,CC2D2A,57545:up|hsa:57505,AARS2,57505:up|hsa:1950,EGF,1950:up|hsa:25802,LMOD1,25802:down|hsa:10403,NDC80,10403:up|hsa:50810,HDGFRP3,50810:up|hsa:26160,IFT172,26160:up|hsa:4869,NPM1,4869:up|hsa:90167,FRMD7,90167:down|hsa:891,CCNB1,891:up|hsa:255928,SYT14,255928:down|hs…	http://amigo.geneontology.org/cgi-bin/amigo/term_details?term=GO:1902589
mesoderm formation	Biological Process	GO:0001707	9	68	1438	17840	0.0062586926286509	0.00381165919282511	9.467725e-02	0.7292725	hsa:7296,TXNRD1,7296:up|hsa:57669,EPB41L5,57669:up|hsa:90,ACVR1,90:up|hsa:659,BMPR2,659:up|hsa:57045,TWSG1,57045:up|hsa:9314,KLF4,9314:down|hsa:652,BMP4,652:down|hsa:2296,FOXC1,2296:up|hsa:7474,WNT5A,7474:up	http://amigo.geneontology.org/cgi-bin/amigo/term_details?term=GO:0001707
negative regulation of phosphatase activity	Biological Process	GO:0010923	9	68	1438	17840	0.0062586926286509	0.00381165919282511	9.467725e-02	0.7292725	hsa:84365,NIFK,84365:up|hsa:57662,CAMSAP3,57662:down|hsa:163882,CNST,163882:down|hsa:10199,MPHOSPH10,10199:up|hsa:55105,GPATCH2,55105:up|hsa:1408,CRY2,1408:down|hsa:1740,DLG2,1740:down|hsa:6093,ROCK1,6093:up|hsa:9475,ROCK2,9475:up	http://amigo.geneontology.org/cgi-bin/amigo/term_details?term=GO:0010923
regulation of heart rate	Biological Process	GO:0002027	11	88	1438	17840	0.00764951321279555	0.00493273542600897	9.568624e-02	0.7292725	hsa:10142,AKAP9,10142:up|hsa:3728,JUP,3728:down|hsa:1824,DSC2,1824:up|hsa:3759,KCNJ2,3759:down|hsa:4878,NPPA,4878:up|hsa:1829,DSG2,1829:up|hsa:51086,TNNI3K,51086:down|hsa:5144,PDE4D,5144:down|hsa:3757,KCNH2,3757:up|hsa:10021,HCN4,10021:up|hsa:7168,TPM1,7168:up	http://amigo.geneontology.org/cgi-bin/amigo/term_details?term=GO:0002027
cellular macromolecule biosynthetic process	Biological Process	GO:0034645	404	4745	1438	17840	0.280945757997218	0.26597533632287	9.576996e-02	0.7292725	hsa:23390,ZDHHC17,23390:up|hsa:90,ACVR1,90:up|hsa:57505,AARS2,57505:up|hsa:1950,EGF,1950:up|hsa:4869,NPM1,4869:up|hsa:65056,GPBP1,65056:up|hsa:6596,HLTF,6596:up|hsa:170622,COMMD6,170622:up|hsa:51312,SLC25A37,51312:up|hsa:26053,AUTS2,26053:up|hsa:56924,PAK6,56924:down|hsa:440400,RNASEK,440400:up|hsa:7752,ZNF200,7752:up|hsa:3479,IGF1,3479:down|hsa:7707,ZNF148,7707:up|hsa:1408,CRY2,1408:down|hsa:925…	http://amigo.geneontology.org/cgi-bin/amigo/term_details?term=GO:0034645
regulation of lipid biosynthetic process	Biological Process	GO:0046890	15	129	1438	17840	0.0104311543810848	0.00723094170403587	9.590636e-02	0.7292725	hsa:7421,VDR,7421:up|hsa:33,ACADL,33:down|hsa:51141,INSIG2,51141:up|hsa:23409,SIRT4,23409:up|hsa:145264,SERPINA12,145264:down|hsa:2181,ACSL3,2181:up|hsa:5166,PDK4,5166:down|hsa:11160,ERLIN2,11160:up|hsa:55294,FBXW7,55294:down|hsa:672,BRCA1,672:up|hsa:79888,LPCAT1,79888:up|hsa:345275,HSD17B13,345275:down|hsa:9572,NR1D1,9572:down|hsa:338,APOB,338:down|hsa:2822,GPLD1,2822:down	http://amigo.geneontology.org/cgi-bin/amigo/term_details?term=GO:0046890
regulation of cholesterol metabolic process	Biological Process	GO:0090181	4	22	1438	17840	0.00278164116828929	0.00123318385650224	9.598415e-02	0.7292725	hsa:33,ACADL,33:down|hsa:145264,SERPINA12,145264:down|hsa:338,APOB,338:down|hsa:11160,ERLIN2,11160:up	http://amigo.geneontology.org/cgi-bin/amigo/term_details?term=GO:0090181
carbohydrate phosphorylation	Biological Process	GO:0046835	4	22	1438	17840	0.00278164116828929	0.00123318385650224	9.598415e-02	0.7292725	hsa:5210,PFKFB4,5210:up|hsa:80201,HKDC1,80201:down|hsa:3795,KHK,3795:up|hsa:5213,PFKM,5213:up	http://amigo.geneontology.org/cgi-bin/amigo/term_details?term=GO:0046835
positive regulation of collagen biosynthetic process	Biological Process	GO:0032967	4	22	1438	17840	0.00278164116828929	0.00123318385650224	9.598415e-02	0.7292725	hsa:652,BMP4,652:down|hsa:3066,HDAC2,3066:up|hsa:51430,SUCO,51430:up|hsa:8710,SERPINB7,8710:down	http://amigo.geneontology.org/cgi-bin/amigo/term_details?term=GO:0032967
cochlea morphogenesis	Biological Process	GO:0090103	4	22	1438	17840	0.00278164116828929	0.00123318385650224	9.598415e-02	0.7292725	hsa:2535,FZD2,2535:up|hsa:57216,VANGL2,57216:up|hsa:6662,SOX9,6662:up|hsa:7474,WNT5A,7474:up	http://amigo.geneontology.org/cgi-bin/amigo/term_details?term=GO:0090103
positive regulation of protein autophosphorylation	Biological Process	GO:0031954	4	22	1438	17840	0.00278164116828929	0.00123318385650224	9.598415e-02	0.7292725	hsa:26585,GREM1,26585:down|hsa:152110,NEK10,152110:up|hsa:10111,RAD50,10111:up|hsa:5911,RAP2A,5911:up	http://amigo.geneontology.org/cgi-bin/amigo/term_details?term=GO:0031954
protein-lipid complex assembly	Biological Process	GO:0065005	4	22	1438	17840	0.00278164116828929	0.00123318385650224	9.598415e-02	0.7292725	hsa:4547,MTTP,4547:down|hsa:8435,SOAT2,8435:up|hsa:338,APOB,338:down|hsa:2181,ACSL3,2181:up	http://amigo.geneontology.org/cgi-bin/amigo/term_details?term=GO:0065005
nuclear DNA replication	Biological Process	GO:0033260	4	22	1438	17840	0.00278164116828929	0.00123318385650224	9.598415e-02	0.7292725	hsa:9837,GINS1,9837:up|hsa:546,ATRX,546:up|hsa:54962,TIPIN,54962:up|hsa:1602,DACH1,1602:up	http://amigo.geneontology.org/cgi-bin/amigo/term_details?term=GO:0033260
cellular nitrogen compound metabolic process	Biological Process	GO:0034641	527	6251	1438	17840	0.366481223922114	0.350392376681614	9.624818e-02	0.7292725	hsa:56606,SLC2A9,56606:up|hsa:57505,AARS2,57505:up|hsa:4869,NPM1,4869:up|hsa:65056,GPBP1,65056:up|hsa:6596,HLTF,6596:up|hsa:4338,MOCS2,4338:up|hsa:26053,AUTS2,26053:up|hsa:7707,ZNF148,7707:up|hsa:1408,CRY2,1408:down|hsa:92552,ATXN3L,92552:down|hsa:27332,ZNF638,27332:up|hsa:6787,NEK4,6787:up|hsa:388753,COA6,388753:up|hsa:222546,RFX6,222546:down|hsa:23409,SIRT4,23409:up|hsa:10962,MLLT11,10962:up|hs…	http://amigo.geneontology.org/cgi-bin/amigo/term_details?term=GO:0034641
regulation of heart contraction	Biological Process	GO:0008016	24	225	1438	17840	0.0166898470097357	0.0126121076233184	9.652863e-02	0.7292725	hsa:10142,AKAP9,10142:up|hsa:3728,JUP,3728:down|hsa:3759,KCNJ2,3759:down|hsa:157378,TMEM65,157378:up|hsa:4878,NPPA,4878:up|hsa:4882,NPR2,4882:down|hsa:1573,CYP2J2,1573:down|hsa:154,ADRB2,154:down|hsa:10021,HCN4,10021:up|hsa:3757,KCNH2,3757:up|hsa:487,ATP2A1,487:up|hsa:1113,CHGA,1113:up|hsa:84525,HOPX,84525:down|hsa:3750,KCND1,3750:up|hsa:1824,DSC2,1824:up|hsa:1829,DSG2,1829:up|hsa:6548,SLC9A1,654…	http://amigo.geneontology.org/cgi-bin/amigo/term_details?term=GO:0008016
regulation of synapse maturation	Biological Process	GO:0090128	3	14	1438	17840	0.00208623087621697	0.0007847533632287	9.745713e-02	0.7292725	hsa:27185,DISC1,27185:down|hsa:9378,NRXN1,9378:down|hsa:9148,NEURL1,9148:down	http://amigo.geneontology.org/cgi-bin/amigo/term_details?term=GO:0090128
hyaluronan biosynthetic process	Biological Process	GO:0030213	3	14	1438	17840	0.00208623087621697	0.0007847533632287	9.745713e-02	0.7292725	hsa:3038,HAS3,3038:up|hsa:1950,EGF,1950:up|hsa:5734,PTGER4,5734:up	http://amigo.geneontology.org/cgi-bin/amigo/term_details?term=GO:0030213
regulation of lipoprotein particle clearance	Biological Process	GO:0010984	3	14	1438	17840	0.00208623087621697	0.0007847533632287	9.745713e-02	0.7292725	hsa:9388,LIPG,9388:up|hsa:10330,CNPY2,10330:up|hsa:2822,GPLD1,2822:down	http://amigo.geneontology.org/cgi-bin/amigo/term_details?term=GO:0010984
regulation of smooth muscle cell apoptotic process	Biological Process	GO:0034391	3	14	1438	17840	0.00208623087621697	0.0007847533632287	9.745713e-02	0.7292725	hsa:4040,LRP6,4040:up|hsa:1029,CDKN2A,1029:up|hsa:3479,IGF1,3479:down	http://amigo.geneontology.org/cgi-bin/amigo/term_details?term=GO:0034391
mitotic chromosome condensation	Biological Process	GO:0007076	3	14	1438	17840	0.00208623087621697	0.0007847533632287	9.745713e-02	0.7292725	hsa:10592,SMC2,10592:up|hsa:113130,CDCA5,113130:up|hsa:10051,SMC4,10051:up	http://amigo.geneontology.org/cgi-bin/amigo/term_details?term=GO:0007076
regulation of microvillus organization	Biological Process	GO:0032530	3	14	1438	17840	0.00208623087621697	0.0007847533632287	9.745713e-02	0.7292725	hsa:688,KLF5,688:down|hsa:5337,PLD1,5337:down|hsa:6624,FSCN1,6624:up	http://amigo.geneontology.org/cgi-bin/amigo/term_details?term=GO:0032530
regulation of establishment of planar polarity involved in neural tube closure	Biological Process	GO:0090178	3	14	1438	17840	0.00208623087621697	0.0007847533632287	9.745713e-02	0.7292725	hsa:2535,FZD2,2535:up|hsa:57216,VANGL2,57216:up|hsa:7474,WNT5A,7474:up	http://amigo.geneontology.org/cgi-bin/amigo/term_details?term=GO:0090178
lymphangiogenesis	Biological Process	GO:0001946	3	14	1438	17840	0.00208623087621697	0.0007847533632287	9.745713e-02	0.7292725	hsa:5532,PPP3CB,5532:up|hsa:659,BMPR2,659:up|hsa:2296,FOXC1,2296:up	http://amigo.geneontology.org/cgi-bin/amigo/term_details?term=GO:0001946
establishment or maintenance of monopolar cell polarity	Biological Process	GO:0061339	3	14	1438	17840	0.00208623087621697	0.0007847533632287	9.745713e-02	0.7292725	hsa:6624,FSCN1,6624:up|hsa:5584,PRKCI,5584:up|hsa:7474,WNT5A,7474:up	http://amigo.geneontology.org/cgi-bin/amigo/term_details?term=GO:0061339
cellular response to electrical stimulus	Biological Process	GO:0071257	3	14	1438	17840	0.00208623087621697	0.0007847533632287	9.745713e-02	0.7292725	hsa:6548,SLC9A1,6548:down|hsa:3091,HIF1A,3091:up|hsa:3479,IGF1,3479:down	http://amigo.geneontology.org/cgi-bin/amigo/term_details?term=GO:0071257
epithelial cell-cell adhesion	Biological Process	GO:0090136	3	14	1438	17840	0.00208623087621697	0.0007847533632287	9.745713e-02	0.7292725	hsa:57662,CAMSAP3,57662:down|hsa:3728,JUP,3728:down|hsa:7060,THBS4,7060:up	http://amigo.geneontology.org/cgi-bin/amigo/term_details?term=GO:0090136
vocalization behavior	Biological Process	GO:0071625	3	14	1438	17840	0.00208623087621697	0.0007847533632287	9.745713e-02	0.7292725	hsa:9378,NRXN1,9378:down|hsa:22829,NLGN4Y,22829:up|hsa:26053,AUTS2,26053:up	http://amigo.geneontology.org/cgi-bin/amigo/term_details?term=GO:0071625
cytokine secretion involved in immune response	Biological Process	GO:0002374	3	14	1438	17840	0.00208623087621697	0.0007847533632287	9.745713e-02	0.7292725	hsa:7097,TLR2,7097:up|hsa:9474,ATG5,9474:up|hsa:7474,WNT5A,7474:up	http://amigo.geneontology.org/cgi-bin/amigo/term_details?term=GO:0002374
cell migration involved in gastrulation	Biological Process	GO:0042074	3	14	1438	17840	0.00208623087621697	0.0007847533632287	9.745713e-02	0.7292725	hsa:57669,EPB41L5,57669:up|hsa:154796,AMOT,154796:down|hsa:7474,WNT5A,7474:up	http://amigo.geneontology.org/cgi-bin/amigo/term_details?term=GO:0042074
regulation of platelet-derived growth factor receptor signaling pathway	Biological Process	GO:0010640	3	14	1438	17840	0.00208623087621697	0.0007847533632287	9.745713e-02	0.7292725	hsa:5771,PTPN2,5771:up|hsa:5795,PTPRJ,5795:up|hsa:9678,PHF14,9678:up	http://amigo.geneontology.org/cgi-bin/amigo/term_details?term=GO:0010640
positive regulation of endoplasmic reticulum unfolded protein response	Biological Process	GO:1900103	3	14	1438	17840	0.00208623087621697	0.0007847533632287	9.745713e-02	0.7292725	hsa:5771,PTPN2,5771:up|hsa:10018,BCL2L11,10018:up|hsa:55161,TMEM33,55161:up	http://amigo.geneontology.org/cgi-bin/amigo/term_details?term=GO:1900103
C-terminal protein amino acid modification	Biological Process	GO:0018410	3	14	1438	17840	0.00208623087621697	0.0007847533632287	9.745713e-02	0.7292725	hsa:9140,ATG12,9140:up|hsa:84938,ATG4C,84938:up|hsa:9474,ATG5,9474:up	http://amigo.geneontology.org/cgi-bin/amigo/term_details?term=GO:0018410
smooth muscle cell apoptotic process	Biological Process	GO:0034390	3	14	1438	17840	0.00208623087621697	0.0007847533632287	9.745713e-02	0.7292725	hsa:4040,LRP6,4040:up|hsa:1029,CDKN2A,1029:up|hsa:3479,IGF1,3479:down	http://amigo.geneontology.org/cgi-bin/amigo/term_details?term=GO:0034390
regulation of intracellular protein transport	Biological Process	GO:0033157	38	380	1438	17840	0.0264255910987483	0.0213004484304933	9.797450e-02	0.7292725	hsa:3728,JUP,3728:down|hsa:114899,C1QTNF3,114899:down|hsa:1950,EGF,1950:up|hsa:54069,MIS18A,54069:up|hsa:3843,IPO5,3843:up|hsa:5532,PPP3CB,5532:up|hsa:9141,PDCD5,9141:up|hsa:163882,CNST,163882:down|hsa:80184,CEP290,80184:up|hsa:3479,IGF1,3479:down|hsa:6548,SLC9A1,6548:down|hsa:55294,FBXW7,55294:down|hsa:3717,JAK2,3717:up|hsa:51706,CYB5R1,51706:down|hsa:3320,HSP90AA1,3320:up|hsa:56892,C8orf4,56892…	http://amigo.geneontology.org/cgi-bin/amigo/term_details?term=GO:0033157
heterocycle biosynthetic process	Biological Process	GO:0018130	364	4261	1438	17840	0.253129346314325	0.238845291479821	9.858929e-02	0.7292725	hsa:90,ACVR1,90:up|hsa:1950,EGF,1950:up|hsa:4869,NPM1,4869:up|hsa:65056,GPBP1,65056:up|hsa:6596,HLTF,6596:up|hsa:4338,MOCS2,4338:up|hsa:170622,COMMD6,170622:up|hsa:26053,AUTS2,26053:up|hsa:56924,PAK6,56924:down|hsa:440400,RNASEK,440400:up|hsa:7752,ZNF200,7752:up|hsa:3479,IGF1,3479:down|hsa:7707,ZNF148,7707:up|hsa:1408,CRY2,1408:down|hsa:1836,SLC26A2,1836:up|hsa:92552,ATXN3L,92552:down|hsa:1786,DN…	http://amigo.geneontology.org/cgi-bin/amigo/term_details?term=GO:0018130
organic substance biosynthetic process	Biological Process	GO:1901576	501	5935	1438	17840	0.348400556328234	0.332679372197309	9.876068e-02	0.7292725	hsa:23390,ZDHHC17,23390:up|hsa:90,ACVR1,90:up|hsa:57505,AARS2,57505:up|hsa:1950,EGF,1950:up|hsa:4869,NPM1,4869:up|hsa:65056,GPBP1,65056:up|hsa:6596,HLTF,6596:up|hsa:4338,MOCS2,4338:up|hsa:170622,COMMD6,170622:up|hsa:51312,SLC25A37,51312:up|hsa:26053,AUTS2,26053:up|hsa:56924,PAK6,56924:down|hsa:55326,AGPAT5,55326:up|hsa:440400,RNASEK,440400:up|hsa:220,ALDH1A3,220:up|hsa:7752,ZNF200,7752:up|hsa:347…	http://amigo.geneontology.org/cgi-bin/amigo/term_details?term=GO:1901576
regulation of meiotic cell cycle	Biological Process	GO:0051445	6	40	1438	17840	0.00417246175243394	0.00224215246636771	9.919570e-02	0.7292725	hsa:811,CALR,811:up|hsa:84690,SPATA22,84690:down|hsa:259266,ASPM,259266:up|hsa:4882,NPR2,4882:down|hsa:7474,WNT5A,7474:up|hsa:5008,OSM,5008:up	http://amigo.geneontology.org/cgi-bin/amigo/term_details?term=GO:0051445
cochlea development	Biological Process	GO:0090102	6	40	1438	17840	0.00417246175243394	0.00224215246636771	9.919570e-02	0.7292725	hsa:55084,SOBP,55084:up|hsa:3776,KCNK2,3776:up|hsa:2535,FZD2,2535:up|hsa:57216,VANGL2,57216:up|hsa:6662,SOX9,6662:up|hsa:7474,WNT5A,7474:up	http://amigo.geneontology.org/cgi-bin/amigo/term_details?term=GO:0090102
acylglycerol metabolic process	Biological Process	GO:0006639	13	109	1438	17840	0.0090403337969402	0.00610986547085202	9.939471e-02	0.7292725	hsa:892,CCNC,892:up|hsa:51141,INSIG2,51141:up|hsa:8513,LIPF,8513:down|hsa:283,ANG,283:down|hsa:10555,AGPAT2,10555:down|hsa:55326,AGPAT5,55326:up|hsa:145264,SERPINA12,145264:down|hsa:8527,DGKD,8527:up|hsa:55294,FBXW7,55294:down|hsa:79888,LPCAT1,79888:up|hsa:2712,GK2,2712:down|hsa:338,APOB,338:down|hsa:2822,GPLD1,2822:down	http://amigo.geneontology.org/cgi-bin/amigo/term_details?term=GO:0006639
positive regulation of osteoblast differentiation	Biological Process	GO:0045669	8	59	1438	17840	0.00556328233657858	0.00330717488789238	9.983159e-02	0.7292725	hsa:56998,CTNNBIP1,56998:down|hsa:860,RUNX2,860:up|hsa:90,ACVR1,90:up|hsa:659,BMPR2,659:up|hsa:5734,PTGER4,5734:up|hsa:51430,SUCO,51430:up|hsa:3479,IGF1,3479:down|hsa:652,BMP4,652:down	http://amigo.geneontology.org/cgi-bin/amigo/term_details?term=GO:0045669
regulation of sister chromatid segregation	Biological Process	GO:0033045	8	59	1438	17840	0.00556328233657858	0.00330717488789238	9.983159e-02	0.7292725	hsa:7175,TPR,7175:up|hsa:546,ATRX,546:up|hsa:1063,CENPF,1063:up|hsa:113130,CDCA5,113130:up|hsa:699,BUB1,699:up|hsa:1062,CENPE,1062:up|hsa:891,CCNB1,891:up|hsa:55719,SLF2,55719:up	http://amigo.geneontology.org/cgi-bin/amigo/term_details?term=GO:0033045
positive regulation of multicellular organismal metabolic process	Biological Process	GO:0044253	5	31	1438	17840	0.00347705146036161	0.00173766816143498	9.988317e-02	0.7292725	hsa:154,ADRB2,154:down|hsa:652,BMP4,652:down|hsa:3066,HDAC2,3066:up|hsa:51430,SUCO,51430:up|hsa:8710,SERPINB7,8710:down	http://amigo.geneontology.org/cgi-bin/amigo/term_details?term=GO:0044253
glucose catabolic process	Biological Process	GO:0006007	5	31	1438	17840	0.00347705146036161	0.00173766816143498	9.988317e-02	0.7292725	hsa:5210,PFKFB4,5210:up|hsa:57103,TIGAR,57103:up|hsa:229,ALDOB,229:down|hsa:230,ALDOC,230:down|hsa:5213,PFKM,5213:up	http://amigo.geneontology.org/cgi-bin/amigo/term_details?term=GO:0006007
negative regulation of mitotic sister chromatid segregation	Biological Process	GO:0033048	5	31	1438	17840	0.00347705146036161	0.00173766816143498	9.988317e-02	0.7292725	hsa:7175,TPR,7175:up|hsa:699,BUB1,699:up|hsa:891,CCNB1,891:up|hsa:546,ATRX,546:up|hsa:1063,CENPF,1063:up	http://amigo.geneontology.org/cgi-bin/amigo/term_details?term=GO:0033048
regulation of gene expression	Biological Process	GO:0010468	355	4153	1438	17840	0.246870653685675	0.232791479820628	9.992501e-02	0.7292725	hsa:90,ACVR1,90:up|hsa:1410,CRYAB,1410:down|hsa:1950,EGF,1950:up|hsa:4869,NPM1,4869:up|hsa:65056,GPBP1,65056:up|hsa:6596,HLTF,6596:up|hsa:891,CCNB1,891:up|hsa:170622,COMMD6,170622:up|hsa:26053,AUTS2,26053:up|hsa:56924,PAK6,56924:down|hsa:7752,ZNF200,7752:up|hsa:3479,IGF1,3479:down|hsa:7707,ZNF148,7707:up|hsa:1408,CRY2,1408:down|hsa:92552,ATXN3L,92552:down|hsa:1786,DNMT1,1786:up|hsa:27332,ZNF638,2…	http://amigo.geneontology.org/cgi-bin/amigo/term_details?term=GO:0010468
cellular nitrogen compound biosynthetic process	Biological Process	GO:0044271	405	4762	1438	17840	0.281641168289291	0.266928251121076	9.995852e-02	0.7292725	hsa:90,ACVR1,90:up|hsa:57505,AARS2,57505:up|hsa:1950,EGF,1950:up|hsa:4869,NPM1,4869:up|hsa:65056,GPBP1,65056:up|hsa:6596,HLTF,6596:up|hsa:170622,COMMD6,170622:up|hsa:51312,SLC25A37,51312:up|hsa:26053,AUTS2,26053:up|hsa:56924,PAK6,56924:down|hsa:440400,RNASEK,440400:up|hsa:7752,ZNF200,7752:up|hsa:3479,IGF1,3479:down|hsa:7707,ZNF148,7707:up|hsa:1408,CRY2,1408:down|hsa:1836,SLC26A2,1836:up|hsa:17154…	http://amigo.geneontology.org/cgi-bin/amigo/term_details?term=GO:0044271
male sex differentiation	Biological Process	GO:0046661	17	151	1438	17840	0.0118219749652295	0.00846412556053812	1.006839e-01	0.7292725	hsa:546,ATRX,546:up|hsa:4142,MAS1,4142:down|hsa:259266,ASPM,259266:up|hsa:2706,GJB2,2706:up|hsa:638,BIK,638:up|hsa:6662,SOX9,6662:up|hsa:51742,ARID4B,51742:up|hsa:2175,FANCA,2175:up|hsa:7482,WNT2B,7482:down|hsa:3206,HOXA10,3206:down|hsa:7474,WNT5A,7474:up|hsa:56956,LHX9,56956:up|hsa:3205,HOXA9,3205:down|hsa:1515,CTSV,1515:up|hsa:642636,RAD21L1,642636:down|hsa:6665,SOX15,6665:down|hsa:10018,BCL2L1…	http://amigo.geneontology.org/cgi-bin/amigo/term_details?term=GO:0046661
regulation of epithelial cell proliferation	Biological Process	GO:0050678	29	281	1438	17840	0.0201668984700974	0.0157511210762332	1.010380e-01	0.7292725	hsa:4321,MMP12,4321:up|hsa:8573,CASK,8573:up|hsa:659,BMPR2,659:up|hsa:6662,SOX9,6662:up|hsa:26160,IFT172,26160:up|hsa:55840,EAF2,55840:up|hsa:57152,SLURP1,57152:down|hsa:252983,STXBP4,252983:up|hsa:7474,WNT5A,7474:up|hsa:7421,VDR,7421:up|hsa:10247,RIDA,10247:up|hsa:675,BRCA2,675:up|hsa:283,ANG,283:down|hsa:1535,CYBA,1535:up|hsa:3091,HIF1A,3091:up|hsa:7060,THBS4,7060:up|hsa:1232,CCR3,1232:down|hsa…	http://amigo.geneontology.org/cgi-bin/amigo/term_details?term=GO:0050678
regulation of bone mineralization	Biological Process	GO:0030500	9	69	1438	17840	0.0062586926286509	0.0038677130044843	1.015246e-01	0.7292725	hsa:26585,GREM1,26585:down|hsa:90,ACVR1,90:up|hsa:659,BMPR2,659:up|hsa:3091,HIF1A,3091:up|hsa:6662,SOX9,6662:up|hsa:91461,PKDCC,91461:down|hsa:652,BMP4,652:down|hsa:154,ADRB2,154:down|hsa:359845,FAM101B,359845:up	http://amigo.geneontology.org/cgi-bin/amigo/term_details?term=GO:0030500
reproductive structure development	Biological Process	GO:0048608	41	415	1438	17840	0.0285118219749652	0.023262331838565	1.015914e-01	0.7292725	hsa:659,BMPR2,659:up|hsa:546,ATRX,546:up|hsa:1508,CTSB,1508:up|hsa:4142,MAS1,4142:down|hsa:638,BIK,638:up|hsa:6662,SOX9,6662:up|hsa:116,ADCYAP1,116:up|hsa:7474,WNT5A,7474:up|hsa:3206,HOXA10,3206:down|hsa:7482,WNT2B,7482:down|hsa:3696,ITGB8,3696:up|hsa:283,ANG,283:down|hsa:1046,CDX4,1046:down|hsa:6788,STK3,6788:up|hsa:835,CASP2,835:up|hsa:4040,LRP6,4040:up|hsa:10018,BCL2L11,10018:up|hsa:841,CASP8,…	http://amigo.geneontology.org/cgi-bin/amigo/term_details?term=GO:0048608
aromatic compound biosynthetic process	Biological Process	GO:0019438	364	4265	1438	17840	0.253129346314325	0.239069506726457	1.022785e-01	0.7292725	hsa:90,ACVR1,90:up|hsa:1950,EGF,1950:up|hsa:4869,NPM1,4869:up|hsa:65056,GPBP1,65056:up|hsa:6596,HLTF,6596:up|hsa:170622,COMMD6,170622:up|hsa:26053,AUTS2,26053:up|hsa:56924,PAK6,56924:down|hsa:440400,RNASEK,440400:up|hsa:7752,ZNF200,7752:up|hsa:3479,IGF1,3479:down|hsa:7707,ZNF148,7707:up|hsa:1408,CRY2,1408:down|hsa:1836,SLC26A2,1836:up|hsa:92552,ATXN3L,92552:down|hsa:1786,DNMT1,1786:up|hsa:27332,Z…	http://amigo.geneontology.org/cgi-bin/amigo/term_details?term=GO:0019438
striated muscle tissue development	Biological Process	GO:0014706	33	326	1438	17840	0.0229485396383866	0.0182735426008969	1.032635e-01	0.7292725	hsa:9150,CTDP1,9150:down|hsa:90,ACVR1,90:up|hsa:70,ACTC1,70:down|hsa:1508,CTSB,1508:up|hsa:1063,CENPF,1063:up|hsa:7135,TNNI1,7135:up|hsa:891,CCNB1,891:up|hsa:7474,WNT5A,7474:up|hsa:811,CALR,811:up|hsa:9456,HOMER1,9456:up|hsa:23363,OBSL1,23363:up|hsa:10529,NEBL,10529:down|hsa:1829,DSG2,1829:up|hsa:6548,SLC9A1,6548:down|hsa:3776,KCNK2,3776:up|hsa:55553,SOX6,55553:down|hsa:26585,GREM1,26585:down|hsa…	http://amigo.geneontology.org/cgi-bin/amigo/term_details?term=GO:0014706
regulation of cell cycle process	Biological Process	GO:0010564	53	552	1438	17840	0.0368567454798331	0.0309417040358744	1.037659e-01	0.7292725	hsa:685,BTC,685:down|hsa:152110,NEK10,152110:up|hsa:546,ATRX,546:up|hsa:11113,CIT,11113:up|hsa:5721,PSME2,5721:up|hsa:54962,TIPIN,54962:up|hsa:1063,CENPF,1063:up|hsa:1602,DACH1,1602:up|hsa:6662,SOX9,6662:up|hsa:1950,EGF,1950:up|hsa:4869,NPM1,4869:up|hsa:891,CCNB1,891:up|hsa:641,BLM,641:up|hsa:637,BID,637:up|hsa:7474,WNT5A,7474:up|hsa:5586,PKN2,5586:up|hsa:811,CALR,811:up|hsa:57026,PDXP,57026:up|h…	http://amigo.geneontology.org/cgi-bin/amigo/term_details?term=GO:0010564
regulation of relaxation of cardiac muscle	Biological Process	GO:1901897	2	7	1438	17840	0.00139082058414465	0.00039237668161435	1.039059e-01	0.7292725	hsa:5144,PDE4D,5144:down|hsa:1113,CHGA,1113:up	http://amigo.geneontology.org/cgi-bin/amigo/term_details?term=GO:1901897
interleukin-1 alpha production	Biological Process	GO:0032610	2	7	1438	17840	0.00139082058414465	0.00039237668161435	1.039059e-01	0.7292725	hsa:24145,PANX1,24145:up|hsa:5734,PTGER4,5734:up	http://amigo.geneontology.org/cgi-bin/amigo/term_details?term=GO:0032610
regulation of skeletal muscle tissue regeneration	Biological Process	GO:0043416	2	7	1438	17840	0.00139082058414465	0.00039237668161435	1.039059e-01	0.7292725	hsa:6665,SOX15,6665:down|hsa:84525,HOPX,84525:down	http://amigo.geneontology.org/cgi-bin/amigo/term_details?term=GO:0043416
cell proliferation in midbrain	Biological Process	GO:0033278	2	7	1438	17840	0.00139082058414465	0.00039237668161435	1.039059e-01	0.7292725	hsa:7976,FZD3,7976:up|hsa:7474,WNT5A,7474:up	http://amigo.geneontology.org/cgi-bin/amigo/term_details?term=GO:0033278
long-chain fatty acid catabolic process	Biological Process	GO:0042758	2	7	1438	17840	0.00139082058414465	0.00039237668161435	1.039059e-01	0.7292725	hsa:33,ACADL,33:down|hsa:8529,CYP4F2,8529:up	http://amigo.geneontology.org/cgi-bin/amigo/term_details?term=GO:0042758
pericardium morphogenesis	Biological Process	GO:0003344	2	7	1438	17840	0.00139082058414465	0.00039237668161435	1.039059e-01	0.7292725	hsa:4040,LRP6,4040:up|hsa:7474,WNT5A,7474:up	http://amigo.geneontology.org/cgi-bin/amigo/term_details?term=GO:0003344
tetrahydrobiopterin biosynthetic process	Biological Process	GO:0006729	2	7	1438	17840	0.00139082058414465	0.00039237668161435	1.039059e-01	0.7292725	hsa:1719,DHFR,1719:up|hsa:5805,PTS,5805:up	http://amigo.geneontology.org/cgi-bin/amigo/term_details?term=GO:0006729
plus-end-directed vesicle transport along microtubule	Biological Process	GO:0072383	2	7	1438	17840	0.00139082058414465	0.00039237668161435	1.039059e-01	0.7292725	hsa:3799,KIF5B,3799:up|hsa:22920,KIFAP3,22920:up	http://amigo.geneontology.org/cgi-bin/amigo/term_details?term=GO:0072383
tubulin complex assembly	Biological Process	GO:0007021	2	7	1438	17840	0.00139082058414465	0.00039237668161435	1.039059e-01	0.7292725	hsa:6950,TCP1,6950:up|hsa:1410,CRYAB,1410:down	http://amigo.geneontology.org/cgi-bin/amigo/term_details?term=GO:0007021
convergent extension involved in axis elongation	Biological Process	GO:0060028	2	7	1438	17840	0.00139082058414465	0.00039237668161435	1.039059e-01	0.7292725	hsa:57216,VANGL2,57216:up|hsa:7474,WNT5A,7474:up	http://amigo.geneontology.org/cgi-bin/amigo/term_details?term=GO:0060028
response to bacterial lipoprotein	Biological Process	GO:0032493	2	7	1438	17840	0.00139082058414465	0.00039237668161435	1.039059e-01	0.7292725	hsa:7097,TLR2,7097:up|hsa:7096,TLR1,7096:up	http://amigo.geneontology.org/cgi-bin/amigo/term_details?term=GO:0032493
regulation of maintenance of mitotic sister chromatid cohesion	Biological Process	GO:0034182	2	7	1438	17840	0.00139082058414465	0.00039237668161435	1.039059e-01	0.7292725	hsa:546,ATRX,546:up|hsa:55719,SLF2,55719:up	http://amigo.geneontology.org/cgi-bin/amigo/term_details?term=GO:0034182
maintenance of organelle location	Biological Process	GO:0051657	2	7	1438	17840	0.00139082058414465	0.00039237668161435	1.039059e-01	0.7292725	hsa:487,ATP2A1,487:up|hsa:259266,ASPM,259266:up	http://amigo.geneontology.org/cgi-bin/amigo/term_details?term=GO:0051657
regulation of maintenance of sister chromatid cohesion	Biological Process	GO:0034091	2	7	1438	17840	0.00139082058414465	0.00039237668161435	1.039059e-01	0.7292725	hsa:546,ATRX,546:up|hsa:55719,SLF2,55719:up	http://amigo.geneontology.org/cgi-bin/amigo/term_details?term=GO:0034091
insulin metabolic process	Biological Process	GO:1901142	2	7	1438	17840	0.00139082058414465	0.00039237668161435	1.039059e-01	0.7292725	hsa:3416,IDE,3416:down|hsa:4925,NUCB2,4925:up	http://amigo.geneontology.org/cgi-bin/amigo/term_details?term=GO:1901142
regulation of oxidative stress-induced neuron intrinsic apoptotic signaling pathway	Biological Process	GO:1903376	2	7	1438	17840	0.00139082058414465	0.00039237668161435	1.039059e-01	0.7292725	hsa:55294,FBXW7,55294:down|hsa:3091,HIF1A,3091:up	http://amigo.geneontology.org/cgi-bin/amigo/term_details?term=GO:1903376
skeletal myofibril assembly	Biological Process	GO:0014866	2	7	1438	17840	0.00139082058414465	0.00039237668161435	1.039059e-01	0.7292725	hsa:70,ACTC1,70:down|hsa:4629,MYH11,4629:down	http://amigo.geneontology.org/cgi-bin/amigo/term_details?term=GO:0014866
columnar/cuboidal epithelial cell maturation	Biological Process	GO:0002069	2	7	1438	17840	0.00139082058414465	0.00039237668161435	1.039059e-01	0.7292725	hsa:3091,HIF1A,3091:up|hsa:3202,HOXA5,3202:down	http://amigo.geneontology.org/cgi-bin/amigo/term_details?term=GO:0002069
neuron intrinsic apoptotic signaling pathway in response to oxidative stress	Biological Process	GO:0036480	2	7	1438	17840	0.00139082058414465	0.00039237668161435	1.039059e-01	0.7292725	hsa:55294,FBXW7,55294:down|hsa:3091,HIF1A,3091:up	http://amigo.geneontology.org/cgi-bin/amigo/term_details?term=GO:0036480
neural plate morphogenesis	Biological Process	GO:0001839	2	7	1438	17840	0.00139082058414465	0.00039237668161435	1.039059e-01	0.7292725	hsa:57669,EPB41L5,57669:up|hsa:57216,VANGL2,57216:up	http://amigo.geneontology.org/cgi-bin/amigo/term_details?term=GO:0001839
Wnt signaling pathway involved in dorsal/ventral axis specification	Biological Process	GO:0044332	2	7	1438	17840	0.00139082058414465	0.00039237668161435	1.039059e-01	0.7292725	hsa:4040,LRP6,4040:up|hsa:1950,EGF,1950:up	http://amigo.geneontology.org/cgi-bin/amigo/term_details?term=GO:0044332
positive regulation of cell aging	Biological Process	GO:0090343	2	7	1438	17840	0.00139082058414465	0.00039237668161435	1.039059e-01	0.7292725	hsa:9521,EEF1E1,9521:up|hsa:1029,CDKN2A,1029:up	http://amigo.geneontology.org/cgi-bin/amigo/term_details?term=GO:0090343
pantothenate metabolic process	Biological Process	GO:0015939	2	7	1438	17840	0.00139082058414465	0.00039237668161435	1.039059e-01	0.7292725	hsa:8884,SLC5A6,8884:up|hsa:60496,AASDHPPT,60496:up	http://amigo.geneontology.org/cgi-bin/amigo/term_details?term=GO:0015939
embryonic brain development	Biological Process	GO:1990403	2	7	1438	17840	0.00139082058414465	0.00039237668161435	1.039059e-01	0.7292725	hsa:2019,EN1,2019:down|hsa:57545,CC2D2A,57545:up	http://amigo.geneontology.org/cgi-bin/amigo/term_details?term=GO:1990403
positive regulation of ruffle assembly	Biological Process	GO:1900029	2	7	1438	17840	0.00139082058414465	0.00039237668161435	1.039059e-01	0.7292725	hsa:54869,EPS8L1,54869:down|hsa:23242,COBL,23242:down	http://amigo.geneontology.org/cgi-bin/amigo/term_details?term=GO:1900029
rhombomere development	Biological Process	GO:0021546	2	7	1438	17840	0.00139082058414465	0.00039237668161435	1.039059e-01	0.7292725	hsa:3212,HOXB2,3212:down|hsa:1959,EGR2,1959:up	http://amigo.geneontology.org/cgi-bin/amigo/term_details?term=GO:0021546
pointed-end actin filament capping	Biological Process	GO:0051694	2	7	1438	17840	0.00139082058414465	0.00039237668161435	1.039059e-01	0.7292725	hsa:29765,TMOD4,29765:up|hsa:25802,LMOD1,25802:down	http://amigo.geneontology.org/cgi-bin/amigo/term_details?term=GO:0051694
queuosine biosynthetic process	Biological Process	GO:0008616	2	7	1438	17840	0.00139082058414465	0.00039237668161435	1.039059e-01	0.7292725	hsa:132954,PDCL2,132954:down|hsa:5082,PDCL,5082:up	http://amigo.geneontology.org/cgi-bin/amigo/term_details?term=GO:0008616
chromosome movement towards spindle pole	Biological Process	GO:0051305	2	7	1438	17840	0.00139082058414465	0.00039237668161435	1.039059e-01	0.7292725	hsa:1062,CENPE,1062:up|hsa:3837,KPNB1,3837:up	http://amigo.geneontology.org/cgi-bin/amigo/term_details?term=GO:0051305
floor plate development	Biological Process	GO:0033504	2	7	1438	17840	0.00139082058414465	0.00039237668161435	1.039059e-01	0.7292725	hsa:6491,STIL,6491:up|hsa:23242,COBL,23242:down	http://amigo.geneontology.org/cgi-bin/amigo/term_details?term=GO:0033504
plus-end-directed organelle transport along microtubule	Biological Process	GO:0072386	2	7	1438	17840	0.00139082058414465	0.00039237668161435	1.039059e-01	0.7292725	hsa:3799,KIF5B,3799:up|hsa:22920,KIFAP3,22920:up	http://amigo.geneontology.org/cgi-bin/amigo/term_details?term=GO:0072386
dosage compensation by inactivation of X chromosome	Biological Process	GO:0009048	2	7	1438	17840	0.00139082058414465	0.00039237668161435	1.039059e-01	0.7292725	hsa:672,BRCA1,672:up|hsa:23347,SMCHD1,23347:up	http://amigo.geneontology.org/cgi-bin/amigo/term_details?term=GO:0009048
vocal learning	Biological Process	GO:0042297	2	7	1438	17840	0.00139082058414465	0.00039237668161435	1.039059e-01	0.7292725	hsa:64220,STRA6,64220:up|hsa:9378,NRXN1,9378:down	http://amigo.geneontology.org/cgi-bin/amigo/term_details?term=GO:0042297
paraxial mesoderm formation	Biological Process	GO:0048341	2	7	1438	17840	0.00139082058414465	0.00039237668161435	1.039059e-01	0.7292725	hsa:2296,FOXC1,2296:up|hsa:7474,WNT5A,7474:up	http://amigo.geneontology.org/cgi-bin/amigo/term_details?term=GO:0048341
embryonic retina morphogenesis in camera-type eye	Biological Process	GO:0060059	2	7	1438	17840	0.00139082058414465	0.00039237668161435	1.039059e-01	0.7292725	hsa:4040,LRP6,4040:up|hsa:28996,HIPK2,28996:up	http://amigo.geneontology.org/cgi-bin/amigo/term_details?term=GO:0060059
regulation of double-strand break repair via nonhomologous end joining	Biological Process	GO:2001032	2	7	1438	17840	0.00139082058414465	0.00039237668161435	1.039059e-01	0.7292725	hsa:7468,WHSC1,7468:up|hsa:7913,DEK,7913:up	http://amigo.geneontology.org/cgi-bin/amigo/term_details?term=GO:2001032
imitative learning	Biological Process	GO:0098596	2	7	1438	17840	0.00139082058414465	0.00039237668161435	1.039059e-01	0.7292725	hsa:64220,STRA6,64220:up|hsa:9378,NRXN1,9378:down	http://amigo.geneontology.org/cgi-bin/amigo/term_details?term=GO:0098596
negative regulation of MyD88-independent toll-like receptor signaling pathway	Biological Process	GO:0034128	2	7	1438	17840	0.00139082058414465	0.00039237668161435	1.039059e-01	0.7292725	hsa:148022,TICAM1,148022:down|hsa:23643,LY96,23643:up	http://amigo.geneontology.org/cgi-bin/amigo/term_details?term=GO:0034128
learned vocalization behavior or vocal learning	Biological Process	GO:0098598	2	7	1438	17840	0.00139082058414465	0.00039237668161435	1.039059e-01	0.7292725	hsa:64220,STRA6,64220:up|hsa:9378,NRXN1,9378:down	http://amigo.geneontology.org/cgi-bin/amigo/term_details?term=GO:0098598
queuosine metabolic process	Biological Process	GO:0046116	2	7	1438	17840	0.00139082058414465	0.00039237668161435	1.039059e-01	0.7292725	hsa:132954,PDCL2,132954:down|hsa:5082,PDCL,5082:up	http://amigo.geneontology.org/cgi-bin/amigo/term_details?term=GO:0046116
negative regulation of myelination	Biological Process	GO:0031642	2	7	1438	17840	0.00139082058414465	0.00039237668161435	1.039059e-01	0.7292725	hsa:27242,TNFRSF21,27242:up|hsa:9451,EIF2AK3,9451:up	http://amigo.geneontology.org/cgi-bin/amigo/term_details?term=GO:0031642
urea transport	Biological Process	GO:0015840	2	7	1438	17840	0.00139082058414465	0.00039237668161435	1.039059e-01	0.7292725	hsa:89872,AQP10,89872:up|hsa:366,AQP9,366:down	http://amigo.geneontology.org/cgi-bin/amigo/term_details?term=GO:0015840
regulation of NADP metabolic process	Biological Process	GO:1902031	2	7	1438	17840	0.00139082058414465	0.00039237668161435	1.039059e-01	0.7292725	hsa:4200,ME2,4200:up|hsa:57103,TIGAR,57103:up	http://amigo.geneontology.org/cgi-bin/amigo/term_details?term=GO:1902031
endochondral bone morphogenesis	Biological Process	GO:0060350	7	50	1438	17840	0.00486787204450626	0.00280269058295964	1.046769e-01	0.7292725	hsa:860,RUNX2,860:up|hsa:652,BMP4,652:down|hsa:3636,INPPL1,3636:up|hsa:659,BMPR2,659:up|hsa:6781,STC1,6781:up|hsa:6662,SOX9,6662:up|hsa:344901,OSTN,344901:down	http://amigo.geneontology.org/cgi-bin/amigo/term_details?term=GO:0060350
neutral lipid metabolic process	Biological Process	GO:0006638	13	110	1438	17840	0.0090403337969402	0.00616591928251121	1.048593e-01	0.7292725	hsa:892,CCNC,892:up|hsa:51141,INSIG2,51141:up|hsa:8513,LIPF,8513:down|hsa:283,ANG,283:down|hsa:10555,AGPAT2,10555:down|hsa:55326,AGPAT5,55326:up|hsa:145264,SERPINA12,145264:down|hsa:8527,DGKD,8527:up|hsa:55294,FBXW7,55294:down|hsa:79888,LPCAT1,79888:up|hsa:2712,GK2,2712:down|hsa:338,APOB,338:down|hsa:2822,GPLD1,2822:down	http://amigo.geneontology.org/cgi-bin/amigo/term_details?term=GO:0006638
regulation of actin filament-based process	Biological Process	GO:0032970	33	327	1438	17840	0.0229485396383866	0.0183295964125561	1.064025e-01	0.7292725	hsa:6712,SPTBN2,6712:down|hsa:10602,CDC42EP3,10602:up|hsa:3728,JUP,3728:down|hsa:8936,WASF1,8936:up|hsa:25802,LMOD1,25802:down|hsa:90167,FRMD7,90167:down|hsa:85477,SCIN,85477:down|hsa:5756,TWF1,5756:up|hsa:57026,PDXP,57026:up|hsa:23607,CD2AP,23607:up|hsa:1829,DSG2,1829:up|hsa:7984,ARHGEF5,7984:down|hsa:6548,SLC9A1,6548:down|hsa:1265,CNN2,1265:up|hsa:5144,PDE4D,5144:down|hsa:154796,AMOT,154796:dow…	http://amigo.geneontology.org/cgi-bin/amigo/term_details?term=GO:0032970
molting cycle	Biological Process	GO:0042303	12	100	1438	17840	0.00834492350486787	0.00560538116591928	1.065508e-01	0.7292725	hsa:10913,EDAR,10913:up|hsa:9355,LHX2,9355:up|hsa:11166,SOX21,11166:down|hsa:5187,PER1,5187:down|hsa:7976,FZD3,7976:up|hsa:6662,SOX9,6662:up|hsa:1515,CTSV,1515:up|hsa:6635,SNRPE,6635:up|hsa:2304,FOXE1,2304:up|hsa:57216,VANGL2,57216:up|hsa:3066,HDAC2,3066:up|hsa:94234,FOXQ1,94234:down	http://amigo.geneontology.org/cgi-bin/amigo/term_details?term=GO:0042303
hair cycle	Biological Process	GO:0042633	12	100	1438	17840	0.00834492350486787	0.00560538116591928	1.065508e-01	0.7292725	hsa:10913,EDAR,10913:up|hsa:9355,LHX2,9355:up|hsa:11166,SOX21,11166:down|hsa:5187,PER1,5187:down|hsa:7976,FZD3,7976:up|hsa:6662,SOX9,6662:up|hsa:1515,CTSV,1515:up|hsa:6635,SNRPE,6635:up|hsa:2304,FOXE1,2304:up|hsa:57216,VANGL2,57216:up|hsa:3066,HDAC2,3066:up|hsa:94234,FOXQ1,94234:down	http://amigo.geneontology.org/cgi-bin/amigo/term_details?term=GO:0042633
nucleobase-containing compound biosynthetic process	Biological Process	GO:0034654	358	4197	1438	17840	0.248956884561892	0.235257847533632	1.070539e-01	0.7292725	hsa:90,ACVR1,90:up|hsa:1950,EGF,1950:up|hsa:4869,NPM1,4869:up|hsa:65056,GPBP1,65056:up|hsa:6596,HLTF,6596:up|hsa:170622,COMMD6,170622:up|hsa:26053,AUTS2,26053:up|hsa:56924,PAK6,56924:down|hsa:440400,RNASEK,440400:up|hsa:7752,ZNF200,7752:up|hsa:3479,IGF1,3479:down|hsa:7707,ZNF148,7707:up|hsa:1408,CRY2,1408:down|hsa:1836,SLC26A2,1836:up|hsa:92552,ATXN3L,92552:down|hsa:1786,DNMT1,1786:up|hsa:27332,Z…	http://amigo.geneontology.org/cgi-bin/amigo/term_details?term=GO:0034654
cellular biosynthetic process	Biological Process	GO:0044249	494	5859	1438	17840	0.343532684283727	0.328419282511211	1.071273e-01	0.7292725	hsa:23390,ZDHHC17,23390:up|hsa:90,ACVR1,90:up|hsa:57505,AARS2,57505:up|hsa:1950,EGF,1950:up|hsa:4869,NPM1,4869:up|hsa:65056,GPBP1,65056:up|hsa:6596,HLTF,6596:up|hsa:4338,MOCS2,4338:up|hsa:170622,COMMD6,170622:up|hsa:51312,SLC25A37,51312:up|hsa:26053,AUTS2,26053:up|hsa:56924,PAK6,56924:down|hsa:55326,AGPAT5,55326:up|hsa:440400,RNASEK,440400:up|hsa:220,ALDH1A3,220:up|hsa:7752,ZNF200,7752:up|hsa:347…	http://amigo.geneontology.org/cgi-bin/amigo/term_details?term=GO:0044249
maternal process involved in female pregnancy	Biological Process	GO:0060135	8	60	1438	17840	0.00556328233657858	0.00336322869955157	1.075136e-01	0.7292725	hsa:7421,VDR,7421:up|hsa:659,BMPR2,659:up|hsa:3091,HIF1A,3091:up|hsa:1508,CTSB,1508:up|hsa:2706,GJB2,2706:up|hsa:1829,DSG2,1829:up|hsa:1515,CTSV,1515:up|hsa:6781,STC1,6781:up	http://amigo.geneontology.org/cgi-bin/amigo/term_details?term=GO:0060135
nucleotide phosphorylation	Biological Process	GO:0046939	11	90	1438	17840	0.00764951321279555	0.00504484304932735	1.078668e-01	0.7292725	hsa:5210,PFKFB4,5210:up|hsa:1841,DTYMK,1841:up|hsa:57103,TIGAR,57103:up|hsa:3091,HIF1A,3091:up|hsa:230,ALDOC,230:down|hsa:10111,RAD50,10111:up|hsa:3479,IGF1,3479:down|hsa:205,AK4,205:down|hsa:80201,HKDC1,80201:down|hsa:229,ALDOB,229:down|hsa:5213,PFKM,5213:up	http://amigo.geneontology.org/cgi-bin/amigo/term_details?term=GO:0046939
cell aging	Biological Process	GO:0007569	11	90	1438	17840	0.00764951321279555	0.00504484304932735	1.078668e-01	0.7292725	hsa:6787,NEK4,6787:up|hsa:811,CALR,811:up|hsa:675,BRCA2,675:up|hsa:6940,ZNF354A,6940:up|hsa:9093,DNAJA3,9093:up|hsa:4869,NPM1,4869:up|hsa:79677,SMC6,79677:up|hsa:545,ATR,545:up|hsa:5054,SERPINE1,5054:up|hsa:9521,EEF1E1,9521:up|hsa:1029,CDKN2A,1029:up	http://amigo.geneontology.org/cgi-bin/amigo/term_details?term=GO:0007569
cell-cell adhesion	Biological Process	GO:0098609	79	854	1438	17840	0.0549374130737135	0.0478699551569507	1.080731e-01	0.7292725	hsa:7122,CLDN5,7122:down|hsa:26253,CLEC4E,26253:down|hsa:57864,SLC46A2,57864:down|hsa:5817,PVR,5817:up|hsa:27242,TNFRSF21,27242:up|hsa:2266,FGG,2266:down|hsa:18,ABAT,18:up|hsa:9378,NRXN1,9378:down|hsa:6095,RORA,6095:down|hsa:921,CD5,921:up|hsa:7474,WNT5A,7474:up|hsa:23607,CD2AP,23607:up|hsa:26167,PCDHB5,26167:up|hsa:3479,IGF1,3479:down|hsa:841,CASP8,841:up|hsa:1825,DSC3,1825:down|hsa:57662,CAMSAP…	http://amigo.geneontology.org/cgi-bin/amigo/term_details?term=GO:0098609
cellular response to decreased oxygen levels	Biological Process	GO:0036294	16	142	1438	17840	0.0111265646731572	0.00795964125560538	1.081464e-01	0.7292725	hsa:23409,SIRT4,23409:up|hsa:10525,HYOU1,10525:up|hsa:154,ADRB2,154:down|hsa:891,CCNB1,891:up|hsa:6095,RORA,6095:down|hsa:57103,TIGAR,57103:up|hsa:3091,HIF1A,3091:up|hsa:5366,PMAIP1,5366:up|hsa:28996,HIPK2,28996:up|hsa:10449,ACAA2,10449:up|hsa:7220,TRPC1,7220:up|hsa:6548,SLC9A1,6548:down|hsa:3776,KCNK2,3776:up|hsa:112399,EGLN3,112399:down|hsa:6781,STC1,6781:up|hsa:1179,CLCA1,1179:down	http://amigo.geneontology.org/cgi-bin/amigo/term_details?term=GO:0036294
muscle cell development	Biological Process	GO:0055001	16	142	1438	17840	0.0111265646731572	0.00795964125560538	1.081464e-01	0.7292725	hsa:9150,CTDP1,9150:down|hsa:70,ACTC1,70:down|hsa:4878,NPPA,4878:up|hsa:25802,LMOD1,25802:down|hsa:58529,MYOZ1,58529:up|hsa:891,CCNB1,891:up|hsa:91624,NEXN,91624:up|hsa:4629,MYH11,4629:down|hsa:29765,TMOD4,29765:up|hsa:9456,HOMER1,9456:up|hsa:10529,NEBL,10529:down|hsa:23363,OBSL1,23363:up|hsa:3479,IGF1,3479:down|hsa:652,BMP4,652:down|hsa:7168,TPM1,7168:up|hsa:9474,ATG5,9474:up	http://amigo.geneontology.org/cgi-bin/amigo/term_details?term=GO:0055001
hair cycle process	Biological Process	GO:0022405	10	80	1438	17840	0.00695410292072323	0.00448430493273543	1.086449e-01	0.7292725	hsa:10913,EDAR,10913:up|hsa:9355,LHX2,9355:up|hsa:11166,SOX21,11166:down|hsa:7976,FZD3,7976:up|hsa:6662,SOX9,6662:up|hsa:1515,CTSV,1515:up|hsa:2304,FOXE1,2304:up|hsa:57216,VANGL2,57216:up|hsa:3066,HDAC2,3066:up|hsa:94234,FOXQ1,94234:down	http://amigo.geneontology.org/cgi-bin/amigo/term_details?term=GO:0022405
hair follicle development	Biological Process	GO:0001942	10	80	1438	17840	0.00695410292072323	0.00448430493273543	1.086449e-01	0.7292725	hsa:10913,EDAR,10913:up|hsa:9355,LHX2,9355:up|hsa:11166,SOX21,11166:down|hsa:7976,FZD3,7976:up|hsa:6662,SOX9,6662:up|hsa:1515,CTSV,1515:up|hsa:2304,FOXE1,2304:up|hsa:57216,VANGL2,57216:up|hsa:3066,HDAC2,3066:up|hsa:94234,FOXQ1,94234:down	http://amigo.geneontology.org/cgi-bin/amigo/term_details?term=GO:0001942
molting cycle process	Biological Process	GO:0022404	10	80	1438	17840	0.00695410292072323	0.00448430493273543	1.086449e-01	0.7292725	hsa:10913,EDAR,10913:up|hsa:9355,LHX2,9355:up|hsa:11166,SOX21,11166:down|hsa:7976,FZD3,7976:up|hsa:6662,SOX9,6662:up|hsa:1515,CTSV,1515:up|hsa:2304,FOXE1,2304:up|hsa:57216,VANGL2,57216:up|hsa:3066,HDAC2,3066:up|hsa:94234,FOXQ1,94234:down	http://amigo.geneontology.org/cgi-bin/amigo/term_details?term=GO:0022404
mesoderm morphogenesis	Biological Process	GO:0048332	9	70	1438	17840	0.0062586926286509	0.0039237668161435	1.086472e-01	0.7292725	hsa:7296,TXNRD1,7296:up|hsa:57669,EPB41L5,57669:up|hsa:90,ACVR1,90:up|hsa:659,BMPR2,659:up|hsa:57045,TWSG1,57045:up|hsa:9314,KLF4,9314:down|hsa:652,BMP4,652:down|hsa:2296,FOXC1,2296:up|hsa:7474,WNT5A,7474:up	http://amigo.geneontology.org/cgi-bin/amigo/term_details?term=GO:0048332
regulation of centrosome cycle	Biological Process	GO:0046605	6	41	1438	17840	0.00417246175243394	0.00229820627802691	1.087162e-01	0.7292725	hsa:4869,NPM1,4869:up|hsa:7514,XPO1,7514:up|hsa:672,BRCA1,672:up|hsa:899,CCNF,899:up|hsa:9475,ROCK2,9475:up|hsa:4751,NEK2,4751:down	http://amigo.geneontology.org/cgi-bin/amigo/term_details?term=GO:0046605
positive regulation of kidney development	Biological Process	GO:0090184	6	41	1438	17840	0.00417246175243394	0.00229820627802691	1.087162e-01	0.7292725	hsa:26585,GREM1,26585:down|hsa:100133941,CD24,100133941:up|hsa:652,BMP4,652:down|hsa:6662,SOX9,6662:up|hsa:8710,SERPINB7,8710:down|hsa:7482,WNT2B,7482:down	http://amigo.geneontology.org/cgi-bin/amigo/term_details?term=GO:0090184
mitotic cell cycle phase transition	Biological Process	GO:0044772	48	497	1438	17840	0.0333796940194715	0.0278587443946188	1.088039e-01	0.7292725	hsa:22995,CEP152,22995:up|hsa:9134,CCNE2,9134:up|hsa:10142,AKAP9,10142:up|hsa:11116,FGFR1OP,11116:up|hsa:9150,CTDP1,9150:down|hsa:90,ACVR1,90:up|hsa:4175,MCM6,4175:up|hsa:80321,CEP70,80321:up|hsa:4659,PPP1R12A,4659:up|hsa:10383,TUBB4B,10383:down|hsa:5721,PSME2,5721:up|hsa:1063,CENPF,1063:up|hsa:4869,NPM1,4869:up|hsa:891,CCNB1,891:up|hsa:641,BLM,641:up|hsa:637,BID,637:up|hsa:5218,CDK14,5218:up|hsa…	http://amigo.geneontology.org/cgi-bin/amigo/term_details?term=GO:0044772
muscle cell differentiation	Biological Process	GO:0042692	34	339	1438	17840	0.023643949930459	0.0190022421524664	1.090575e-01	0.7292725	hsa:9150,CTDP1,9150:down|hsa:90,ACVR1,90:up|hsa:70,ACTC1,70:down|hsa:6662,SOX9,6662:up|hsa:25802,LMOD1,25802:down|hsa:891,CCNB1,891:up|hsa:6095,RORA,6095:down|hsa:84525,HOPX,84525:down|hsa:811,CALR,811:up|hsa:9456,HOMER1,9456:up|hsa:23363,OBSL1,23363:up|hsa:10529,NEBL,10529:down|hsa:79365,BHLHE41,79365:up|hsa:3479,IGF1,3479:down|hsa:51725,FBXO40,51725:up|hsa:6548,SLC9A1,6548:down|hsa:84814,PLPP7,…	http://amigo.geneontology.org/cgi-bin/amigo/term_details?term=GO:0042692
positive regulation of collagen metabolic process	Biological Process	GO:0010714	4	23	1438	17840	0.00278164116828929	0.00128923766816143	1.091465e-01	0.7292725	hsa:652,BMP4,652:down|hsa:3066,HDAC2,3066:up|hsa:51430,SUCO,51430:up|hsa:8710,SERPINB7,8710:down	http://amigo.geneontology.org/cgi-bin/amigo/term_details?term=GO:0010714
morphogenesis of an epithelial fold	Biological Process	GO:0060571	4	23	1438	17840	0.00278164116828929	0.00128923766816143	1.091465e-01	0.7292725	hsa:652,BMP4,652:down|hsa:3091,HIF1A,3091:up|hsa:7474,WNT5A,7474:up|hsa:7482,WNT2B,7482:down	http://amigo.geneontology.org/cgi-bin/amigo/term_details?term=GO:0060571
glyceraldehyde-3-phosphate metabolic process	Biological Process	GO:0019682	4	23	1438	17840	0.00278164116828929	0.00128923766816143	1.091465e-01	0.7292725	hsa:729020,RPEL1,729020:up|hsa:57103,TIGAR,57103:up|hsa:229,ALDOB,229:down|hsa:3795,KHK,3795:up	http://amigo.geneontology.org/cgi-bin/amigo/term_details?term=GO:0019682
protein localization to synapse	Biological Process	GO:0035418	4	23	1438	17840	0.00278164116828929	0.00128923766816143	1.091465e-01	0.7292725	hsa:1740,DLG2,1740:down|hsa:9746,CLSTN3,9746:up|hsa:9378,NRXN1,9378:down|hsa:7474,WNT5A,7474:up	http://amigo.geneontology.org/cgi-bin/amigo/term_details?term=GO:0035418
establishment of protein localization to chromosome	Biological Process	GO:0070199	4	23	1438	17840	0.00278164116828929	0.00128923766816143	1.091465e-01	0.7292725	hsa:22948,CCT5,22948:up|hsa:10576,CCT2,10576:up|hsa:6950,TCP1,6950:up|hsa:675,BRCA2,675:up	http://amigo.geneontology.org/cgi-bin/amigo/term_details?term=GO:0070199
regulation of branching involved in ureteric bud morphogenesis	Biological Process	GO:0090189	4	23	1438	17840	0.00278164116828929	0.00128923766816143	1.091465e-01	0.7292725	hsa:26585,GREM1,26585:down|hsa:652,BMP4,652:down|hsa:6662,SOX9,6662:up|hsa:7482,WNT2B,7482:down	http://amigo.geneontology.org/cgi-bin/amigo/term_details?term=GO:0090189
regulation of protein secretion	Biological Process	GO:0050708	38	384	1438	17840	0.0264255910987483	0.02152466367713	1.094666e-01	0.7292725	hsa:23086,EXPH5,23086:down|hsa:26253,CLEC4E,26253:down|hsa:114899,C1QTNF3,114899:down|hsa:27242,TNFRSF21,27242:up|hsa:2266,FGG,2266:down|hsa:5532,PPP3CB,5532:up|hsa:18,ABAT,18:up|hsa:9378,NRXN1,9378:down|hsa:338322,NLRP10,338322:down|hsa:24145,PANX1,24145:up|hsa:7474,WNT5A,7474:up|hsa:55540,IL17RB,55540:up|hsa:283,ANG,283:down|hsa:8651,SOCS1,8651:up|hsa:3479,IGF1,3479:down|hsa:3717,JAK2,3717:up|h…	http://amigo.geneontology.org/cgi-bin/amigo/term_details?term=GO:0050708
macromolecule localization	Biological Process	GO:0033036	237	2734	1438	17840	0.16481223922114	0.153251121076233	1.098191e-01	0.7292725	hsa:23086,EXPH5,23086:down|hsa:4052,LTBP1,4052:up|hsa:11116,FGFR1OP,11116:up|hsa:23390,ZDHHC17,23390:up|hsa:10527,IPO7,10527:up|hsa:546,ATRX,546:up|hsa:27242,TNFRSF21,27242:up|hsa:1950,EGF,1950:up|hsa:10403,NDC80,10403:up|hsa:112609,MRAP2,112609:up|hsa:4869,NPM1,4869:up|hsa:9388,LIPG,9388:up|hsa:2266,FGG,2266:down|hsa:18,ABAT,18:up|hsa:891,CCNB1,891:up|hsa:366,AQP9,366:down|hsa:338322,NLRP10,3383…	http://amigo.geneontology.org/cgi-bin/amigo/term_details?term=GO:0033036
plasma lipoprotein particle clearance	Biological Process	GO:0034381	5	32	1438	17840	0.00347705146036161	0.00179372197309417	1.109484e-01	0.7292725	hsa:4040,LRP6,4040:up|hsa:9388,LIPG,9388:up|hsa:10330,CNPY2,10330:up|hsa:338,APOB,338:down|hsa:2822,GPLD1,2822:down	http://amigo.geneontology.org/cgi-bin/amigo/term_details?term=GO:0034381
phosphatidic acid biosynthetic process	Biological Process	GO:0006654	5	32	1438	17840	0.00347705146036161	0.00179372197309417	1.109484e-01	0.7292725	hsa:80821,DDHD1,80821:up|hsa:5337,PLD1,5337:down|hsa:10555,AGPAT2,10555:down|hsa:55326,AGPAT5,55326:up|hsa:79888,LPCAT1,79888:up	http://amigo.geneontology.org/cgi-bin/amigo/term_details?term=GO:0006654
positive regulation of telomere maintenance via telomerase	Biological Process	GO:0032212	5	32	1438	17840	0.00347705146036161	0.00179372197309417	1.109484e-01	0.7292725	hsa:22948,CCT5,22948:up|hsa:10576,CCT2,10576:up|hsa:545,ATR,545:up|hsa:6950,TCP1,6950:up|hsa:4751,NEK2,4751:down	http://amigo.geneontology.org/cgi-bin/amigo/term_details?term=GO:0032212
positive regulation of BMP signaling pathway	Biological Process	GO:0030513	5	32	1438	17840	0.00347705146036161	0.00179372197309417	1.109484e-01	0.7292725	hsa:388585,HES5,388585:down|hsa:652,BMP4,652:down|hsa:64115,C10orf54,64115:down|hsa:659,BMPR2,659:up|hsa:57045,TWSG1,57045:up	http://amigo.geneontology.org/cgi-bin/amigo/term_details?term=GO:0030513
Golgi to plasma membrane protein transport	Biological Process	GO:0043001	5	32	1438	17840	0.00347705146036161	0.00179372197309417	1.109484e-01	0.7292725	hsa:10139,ARFRP1,10139:up|hsa:163882,CNST,163882:down|hsa:91461,PKDCC,91461:down|hsa:57120,GOPC,57120:up|hsa:2181,ACSL3,2181:up	http://amigo.geneontology.org/cgi-bin/amigo/term_details?term=GO:0043001
axis elongation	Biological Process	GO:0003401	5	32	1438	17840	0.00347705146036161	0.00179372197309417	1.109484e-01	0.7292725	hsa:4040,LRP6,4040:up|hsa:652,BMP4,652:down|hsa:57216,VANGL2,57216:up|hsa:6662,SOX9,6662:up|hsa:7474,WNT5A,7474:up	http://amigo.geneontology.org/cgi-bin/amigo/term_details?term=GO:0003401
[truncated: 6,377 more rows]

## Sheet: Cellular Component
Term	Database	ID	Input number	Background number	All input number	All background number	Input frequency	Background frequency	P-Value	Corrected P-Value	Input	Hyperlink
[truncated: 862 more rows]

## Sheet: Molecular Function
Table S2. Molecular Function
[truncated: 1,543 more rows]
